# Supplementary material
Source: Elsevier journal article supplement (https://www.sciencedirect.com/science/article/pii/S0300893218301131)
Supplement: mmc1 [file S0300893218301131:mmc1.pdf]

## SUPPLEMENTARY MATERIAL

### METHODS

We established a systematic review protocol according to the methodological guidance provided by the Cochrane Collaboration<sup>1</sup> and have reported the findings according to the PRISMA statement.<sup>2</sup>

With the main objective to assess the efficacy of new oral anticoagulants, this systematic review addressed the following clinical question: **What is the comparative effectiveness of new oral anticoagulants vs vitamin K antagonists in terms of a reduction in the risk of stroke or bleeding in patients with nonvalvular atrial fibrillation?**

#### Inclusion Criteria

To respond to the clinical question of the review, we considered eligible studies with the following criteria (studies should meet all of them):

- Participants: patients diagnosed with nonvalvular atrial fibrillation (NVAf) with or without a previous stroke;
- Interventions: direct oral anticoagulants (DOACs: apixaban, dabigatran, and rivaroxaban; any dose);
- Control: vitamin K antagonists (VKAs), focusing on warfarin;
- Outcomes: the primary outcome for effectiveness was ischemic stroke. Major and intracranial bleeding were considered the primary safety outcomes. The secondary outcomes of interest were gastrointestinal and fatal bleeding. Additionally, we also considered a composite end point of stroke/systemic embolism. Because all studies reported time-to-event outcomes, in order to be included in the meta-analysis, studies had to not only provide rates, but also effect measures (hazard ratios [HRs]). Otherwise, studies were excluded;
- Study design: we limited the inclusion to observational studies (either prospective or retrospective) reporting on any of the above outcomes from routinely collected health data. To be

included, studies had to use national or regional registries or registries covering a large population across multiple sites. Single-center studies using local registries were excluded unless they had more than 1000 patients. For studies that used the same registry and were performed in the same (or very similar) period, the most complete publication was selected, discarding the rest in order to avoid including the same patients in duplicate in the meta-analysis. Only when it was perceived that the degree of overlap between studies was low were all publications included.

### **Study Identification**

- To retrieve the studies of interest for the review, MEDLINE (through PubMed) and EMBASE (through Ovid) were searched up to March 2017. Search algorithms (Table 1 of the supplementary material) were designed that were adapted to the requirements of each database; these algorithms included a combination of controlled vocabulary search terms and filters to retrieve clinical trials and cohort studies. The bibliography sections of eligible studies were also searched for additional studies.

### **Data Extraction**

- One reviewer extracted data to describe the included studies according to the following variables: reference, objective, country, design, data source, time period, DOAC, control, outcomes, outcome definitions, population (eligibility), population (study sample), population (baseline participant characteristics), and analysis.
- All of the data obtained in this step are included in tables showing the characteristics of the included studies. In addition, 1 researcher extracted data on the effects estimates for the outcomes of interest reported in the included studies, and a second reviewer checked the data extraction for accuracy.

### **Risk of Bias Assessment**

- We assessed the risk of bias of included studies and judged the bias across outcomes of interest. We used the ROBINS-I tool to assess risk of bias because it was specifically designed to assess nonrandomized studies when they are used to measure the impact of interventions<sup>3</sup> (Table 2 of the supplementary material).
- The assessment of threats of validity for the study designs included in the review is a complex task because studies based on routine collected health data do not fit the classical observational design and do not typically collect data with a specific research question,<sup>4</sup> complicating the appraisal of some domains.
- For each study, we assessed confounding, selection bias, bias in measurement interventions, bias due to deviations from intended interventions, bias due to missing data, bias in outcome assessment, and bias in the selection of the reported results. We adapted the original ROBINS-I tool to fit the design of the included studies and their specificities.
- We established some questions to assess the different biases of interest and appraised each included study. We appraised the different domains according to the main outcome of interest in the included studies. Each domain was classified as having low, moderate, or serious risk of bias and we made a final assessment for each study according to the bias across domains. We considered a study to be at (1) low risk of bias if all of the domains were assessed as low risk; (2) moderate risk if all of the domains were assessed as low or moderate risk; and (3) serious risk if the study was considered to be at serious risk in at least 1 domain.

## **Data Analysis**

### *Timepoints and Effect Measures*

- Most studies presented results up to 1 year, with only a few reporting results from longer follow-up periods (2 years or more). The timepoint chosen for the main comparison was 1 year, with secondary analyses defined for longer follow-up results.

- The effect measures were HRs and their corresponding 95% confidence intervals. In all cases, the data extracted were adjusted by the HR reported in the main analyses of the original papers or, exceptionally, by the HR obtained with the most complete adjustment model.
- When available, the data reported in the main analysis corresponds to the most general population: all doses (standard and reduced), all participants (switch and naïve), all ages, and all purposes (primary and secondary prevention). Whenever a study presented only disaggregated data for 1 or more of these subgroups, the most complete nonoverlapping data were used for the main analysis. Whenever a study presented data for only some level of the subgroups (ie, only including naïve participants), these data were included in the main analysis as well as in the corresponding subgroup analysis.

### **Data Synthesis**

- The main comparison of interest was DOACs vs control, presenting results disaggregated by type of DOAC. The control was warfarin but could also be other VKAs. Other main comparisons of interest were head-to-head comparisons between the different DOACs. However, the meta-analysis was only meaningful for the rivaroxaban vs dabigatran comparison because the included studies presented few data for the other head-to-head comparisons. Thus, there are only 2 main comparisons.
- Pooled estimates of effect for the main comparisons (DOACs vs control, and rivaroxaban vs dabigatran) were computed with a random-effects model applying the inverse-variance meta-analysis method. Meta-analyses were conducted for all primary and secondary outcomes assessed at 1 year.
- For secondary analyses (subgroup analyses, sensitivity analyses, and analysis at 2 years), only the primary outcomes of stroke, major bleeding, and intracranial bleeding were analyzed.

- All meta-analyses were stratified by DOACs and included a pooled category with the trials that presented aggregated data for all DOAC. Because most trials provided data for different categories of DOACs, no total was computed for any meta-analysis.

### **Heterogeneity Assessment**

- All of the included studies were observational real-life studies and all of them implemented some kind of procedure to adjust for differences between the cohort of participants taking warfarin, apixaban, dabigatran, or rivaroxaban. The procedures implemented varied across studies (ie, propensity scores or adjusted Cox models), and the number and type of factors adjusted for varied considerably. For these reasons, large clinical heterogeneity was expected in all of the analyses.
- Between-study heterogeneity was assessed through the  $I^2$  statistic, which can take a range of values from 0% (meaning all observed variability in results can be explained by random variation) to 100% (none of the observed variability in results can be explained by random variation). Cutoff values were defined for the  $I^2$  to help in the interpretation of results: values lower than 20% were considered to correspond to unimportant heterogeneity; values between 21% and 65% were considered moderate heterogeneity; and  $I^2$  values over 65% were considered to be highly heterogeneous.

### **Subgroup and Sensitivity Analyses**

- Several secondary analyses were conducted. First of all, secondary analyses were conducted for each of the planned subgroups (naïve and switched participants, standard and reduced doses).
- A secondary analysis was conducted using the longer-term data available in each study.

## **RESULTS**

### **Search Results and Eligibility**

The PRISMA flowchart shows the search results and the decisions made during the eligibility process (Figure 1 of the manuscript). We obtained 4244 references from MEDLINE and EMBASE searches and screened 3391 unique references after eliminating duplicates. We excluded 3312 references based on their title or abstract and obtained 79 full-text studies for the final decision.

After a detailed assessment of the full texts, we excluded 49 studies:

- 19 did not assess an outcome of interest or reported outcome data in a way that could not be analyzed in the meta-analysis (crude data and rates, without providing an effect measure such as the HR) (Avgil-Tsadok et al.,<sup>5</sup> Badal et al.,<sup>6</sup> Bochatay et al.,<sup>7</sup> Chan et al.,<sup>8</sup> Demir et al.,<sup>9</sup> Ellis et al.,<sup>10</sup> Fontaine et al.,<sup>11</sup> Gorst-Rasmussen et al.,<sup>12</sup> Kodani et al.,<sup>13</sup> Kono et al.,<sup>14</sup> Larsen et al.,<sup>15</sup> Lee et al.,<sup>16</sup> Maura et al.,<sup>17</sup> Michel et al.,<sup>18</sup> Palamaner et al.,<sup>19</sup> Shevelev et al.,<sup>20</sup> Sorensen et al.,<sup>21</sup> Steinberg et al.,<sup>22</sup> and Yap et al.<sup>23</sup>);
- 18 did not obtain data from a reliable source (Al-Khalili et al.,<sup>24</sup> Aslan et al.,<sup>25</sup> Ho et al.,<sup>26</sup> Khan et al.,<sup>27</sup> Kilickiran Avci et al.,<sup>8</sup> Konigsbrugge et al.,<sup>29</sup> Korenstra et al.,<sup>30</sup> Kwon et al.,<sup>31</sup> Labaf et al.,<sup>32</sup> Lee et al.,<sup>33</sup> Leef et al.,<sup>34</sup> Marques-Matos et al.,<sup>35</sup> Naganuma et al.,<sup>36</sup> Riley et al.,<sup>37</sup> Saji et al.,<sup>38</sup> Sherid et al.,<sup>39</sup> Yap et al.,<sup>40</sup> and Yavuz et al.<sup>41</sup>);
- 8 reported overlapping data with other included studies (Abraham et al.,<sup>42</sup> Ho et al.,<sup>43</sup> Lamberts et al.,<sup>44</sup> Larsen et al.,<sup>45</sup> Lauffenburger et al.,<sup>46</sup> Lip et al.,<sup>47</sup> Staerk et al.,<sup>48</sup> and Staerk et al.<sup>49</sup>) (overlaps with Yao et al.,<sup>50</sup> overlaps with Li et al.,<sup>51</sup> overlaps with Larsen et al.,<sup>52</sup> and Nielsen et al.,<sup>53</sup> overlaps with Larsen et al.<sup>52</sup> and Nielsen et al.,<sup>53</sup> overlaps with Bengtson et al.,<sup>54</sup> overlaps with Lip et al.,<sup>55</sup> overlaps with Gorst-Rasmussen et al.,<sup>12</sup> overlaps with Larsen et al.<sup>50</sup> and Nielsen et al.,<sup>53</sup> respectively);
- 2 studies did not assess new oral anticoagulants (Guo et al.<sup>56</sup> and Lip et al.<sup>57</sup>);
- 1 reported data from an ineligible population (anticoagulation resumption after a first major bleed in NVAf patients) (Hernandez et al.<sup>58</sup>);
- and 1 did not adjust data for the comparison (the reference group for the comparison comprised patients treated with warfarin and with a time in therapeutic range  $\geq 65\%$ ) (Li et al.<sup>51</sup>).

Finally, we included 27 different studies publishing data in 30 publications (3 studies published relevant data in 2 separate papers): Arihiro et al.<sup>59</sup> (Japan), Avgil-Tsadok et al.<sup>60</sup> (Canada), Bengtson et al.<sup>54</sup> (US), Bouillon et al.<sup>61</sup> (France), Chan et al.<sup>62,63</sup> a+b (Taiwan), Chang et al.<sup>64</sup> (US), Coleman et al.<sup>65</sup> (US), Forslund et al.<sup>66</sup> (Sweden), Gieling et al.<sup>67</sup> (UK), Graham et al.<sup>68</sup> (US), Graham et al.<sup>69</sup> (US), Halvorsen et al.<sup>70</sup> (Norway), Hernandez et al.<sup>71</sup> (US), Hernandez et al.<sup>72</sup> (US), Hohnloser et al.<sup>73</sup> (Germany), Lai et al.<sup>74</sup> (Taiwan), Laliberté et al.<sup>75</sup> (US), Larsen et al.<sup>76,77</sup> a+b (Denmark), Larsen et al.<sup>52</sup> (Denmark), Li et al.<sup>78</sup> (US), Lip et al.<sup>79</sup> (US), Nielsen et al.<sup>53</sup> (Denmark), Nishtala et al.<sup>80</sup> (New Zealand), Noseworthy et al.<sup>81</sup> (US), Seeger et al.<sup>82</sup> (linked to Yao et al.), Vaughan Sarrazin et al.<sup>83</sup> (US), Villinies et al.<sup>84</sup> (US), and Yao et al.<sup>85</sup> (US) (Table 3 of the supplementary material).

## REFERENCES

1. Higgins JPT, Green S (editors). Cochrane Handbook for Systematic Reviews of Interventions Version 5.1.0 [updated March 2011]. The Cochrane Collaboration, 2011. Available from [www.handbook.cochrane.org](http://www.handbook.cochrane.org). Accessed 7 Jan 2018.
2. Moher D, Liberati A, Tetzlaff J, et al. PRISMA Group Preferred reporting items for systematic reviews and meta-analyses: the PRISMA statement. *PLoS Med*. 2009;6:e1000097.
3. Sterne JA, Hernan MA, Reeves BC, et al. ROBINS-I: a tool for assessing risk of bias in non-randomised studies of interventions. *BMJ*. 2016;355:i4919.
4. Benchimol EI, Smeeth L, Guttman A, et al; RECORD Working Committee. The REporting of studies Conducted using Observational Routinely-collected health Data (RECORD) statement. *PLoS Med*. 2015;12:e1001885.
5. Avgil-Tsadok M, Jackevicius CA, Rahme E, Humphries KH, Pilote L. Sex Differences in Dabigatran Use, Safety, And Effectiveness In a Population-Based Cohort of Patients With Atrial Fibrillation. *Circ Cardiovasc Qual Outcomes*. 2015;8:593-599.
6. Badal M, Aryal MR, Mege J, Chaudhary A, Donato AA. Evaluation of Trends of Inpatient Hospitalisation for Significant Haemorrhage in Patients Anticoagulated for Atrial Fibrillation before and after the Release of Novel Anticoagulants. *Heart Lung Circ*. 2015;24:94-97.
7. Bochatay L, Beney J, Jordan-von Gunten V, Petignat PA, Roulet L. [Appropriateness of the prescriptions of conventional versus new oral anticoagulants at discharge from a department of internal medicine]. *Rev Med Interne*. 2016;37:579-586.
8. Chan PH, Huang D, Lau CP, et al. Net Clinical Benefit of Dabigatran Over Warfarin in Patients With Atrial Fibrillation Stratified by CHA(2)DS(2)-VASc and Time in Therapeutic Range. *Can J Cardiol*. 2016;32:1247.e15-1247.e21.
9. Demir S, Ozdag MF, Kendirli MT, Togrol RE. What Do Anticoagulants Say about Microemboli? *J Stroke Cerebrovasc Dis*. 2015;24:2474-2477.
10. Ellis MH, Neuman T, Bitterman H, et al. Bleeding in patients with atrial fibrillation treated with dabigatran, rivaroxaban or warfarin: A retrospective population-based cohort study. *Eur J Intern Med*. 2016;33:55-59.



11. Fontaine GV, Mathews KD, Woller SC, Stevens SM, Lloyd JF, Evans RS. Major bleeding with dabigatran and rivaroxaban in patients with atrial fibrillation: a real-world setting. *Clin Appl Thromb Hemost*. 2014;20:665-672.
12. Gorst-Rasmussen A, Lip GY, Bjerregaard Larsen T. Rivaroxaban versus warfarin and dabigatran in atrial fibrillation: comparative effectiveness and safety in Danish routine care. *Pharmacoepidemiol Drug Saf*. 2016;25:1236-1244.
13. Kodani E, Atarashi H, Inoue H, Okumura K, Yamashita T, Origasa H; J-RHYTHM Registry Investigators. Beneficial Effect of Non-Vitamin K Antagonist Oral Anticoagulants in Patients With Nonvalvular Atrial Fibrillation- Results of the J-RHYTHM Registry 2. *Circ J*. 2016;80:843-851.
14. Kono T, Ogimoto A, Aono J, Okura T, Shigematsu Y, Higaki J. Anticoagulant therapy with dabigatran in elderly patients  $\geq 80$  years of age with atrial fibrillation. *Nihon Ronen Igakkai Zasshi*. 2014;51:350-355.
15. Larsen TB, Rasmussen LH, Gorst-Rasmussen A, et al. Myocardial ischemic events in 'real world' patients with atrial fibrillation treated with dabigatran or warfarin. *Am J Med*. 2014;127:329-336.e4.
16. Lee KH, Park HW, Cho JG, et al. Comparison of non-vitamin K antagonist oral anticoagulants and warfarin on clinical outcomes in atrial fibrillation patients with renal dysfunction. *Europace*. 2015;17(Suppl 2):ii69-75.
17. Maura G, Blotière PO, Bouillon K, et al. Comparison of the short-term risk of bleeding and arterial thromboembolic events in nonvalvular atrial fibrillation patients newly treated with dabigatran or rivaroxaban versus vitamin K antagonists: a French nationwide propensity-matched cohort study. *Circulation*. 2015;132:1252-1260.
18. Michel J, Mundell D, Boga T, Sasse A. Dabigatran for anticoagulation in atrial fibrillation - early clinical experience in a hospital population and comparison to trial data. *Heart Lung Circ*. 2013;22:50-55.
19. Palamaner Subash Shantha G, Bhavé PD, Girotra S, et al. Sex-Specific Comparative Effectiveness of Oral Anticoagulants in Elderly Patients With Newly Diagnosed Atrial Fibrillation. *Circ Cardiovasc Qual Outcomes*. 2017;10:e003418.
20. Shevelev V I, Kanorsky SG. "[Comparative effectiveness and safety of new oral anticoagulants and warfarin in patients with age-specific non-valvular atrial fibrillation]." *Klin Med (Mosk)*. 2015;93:30-36.
21. Sørensen R, Gislason G, Torp-Pedersen C, et al. Dabigatran use in Danish atrial fibrillation patients in 2011: a nationwide study. *BMJ Open*. 2013;3: e002758

22. Steinberg BA, Simon DN, Thomas L, et al; Outcomes Registry for Better Informed Treatment of Atrial Fibrillation (ORBIT-AF) Investigators and Patients. Management of Major Bleeding in Patients With Atrial Fibrillation Treated With Non-Vitamin K Antagonist Oral Anticoagulants Compared With Warfarin in Clinical Practice (from Phase II of the Outcomes Registry for Better Informed Treatment of Atrial Fibrillation [ORBIT-AF II]). *Am J Cardiol*. 2017;119:1590-1595.
23. Yap LB, Rusani BI, Umadevan D, et al. A single centre experience of the efficacy and safety of dabigatran etexilate used for stroke prevention in atrial fibrillation. *J Thromb Thrombolysis*. 2014;38:39-44.
24. Al-Khalili F, Lindström C, Benson L. The safety and persistence of non-vitamin-K-antagonist oral anticoagulants in atrial fibrillation patients treated in a well structured atrial fibrillation clinic. *Curr Med Res Opin*. 2016;32:779-785.
25. Aslan O, Yaylali YT, Yildirim S, et al. Dabigatran Versus Warfarin in Atrial Fibrillation: Multicenter Experience in Turkey. *Clin Appl Thromb Hemost*. 2016;22:147-152.
26. Ho JC, Chang AM, Yan BP, Yu CM, Lam YY, Lee VW. Dabigatran compared with warfarin for stroke prevention with atrial fibrillation: experience in Hong Kong. *Clin Cardiol*. 2012;35:E40-45.
27. Khan F, Huang H, Datta YH. Direct oral anticoagulant use and the incidence of bleeding in the very elderly with atrial fibrillation. *J Thromb Thrombolysis*. 2016;42:573-578.
28. Kilickiran Avci B, Vatan B, Ozden Tok O, et al. The Trends in Utilizing Nonvitamin K Antagonist Oral Anticoagulants in Patients With Nonvalvular Atrial Fibrillation: A Real-Life Experience. *Clin Appl Thromb Hemost*. 2016;22:785-791.
29. Königsbrügge O, Simon A, Domanovits H, Pabinger I, Ay C. Thromboembolic events, bleeding, and drug discontinuation in patients with atrial fibrillation on anticoagulation: a prospective hospital-based registry. *BMC Cardiovasc Disord*. 2016;16:254.
30. Korenstra J, Wijtvliet EP, Veeger NJ, et al. Effectiveness and safety of dabigatran versus acenocoumarol in 'real-world' patients with atrial fibrillation. *Europace*. 2016;18:1319-1327.
31. Kwon CH, Kim M, Kim J, Nam GB, Choi KJ, Kim YH. Real-world comparison of non-vitamin K antagonist oral anticoagulants and warfarin in Asian octogenarian patients with atrial fibrillation. *J Geriatr Cardiol*. 2016;13:566-572.
32. Labaf A, Carlwe M, Svensson PJ. Efficacy and safety of novel oral anticoagulants in clinical practice: a report from three centers in Sweden. *Thromb J*. 2014;12:29.

33. Lee SI, Sayers M, Lip GY, Lane DA. Use of non-vitamin K antagonist oral anticoagulants in atrial fibrillation patients: insights from a specialist atrial fibrillation clinic. *Int J Clin Pract*. 2015;69:1341-1348.
34. Leef G, Qin D, Althouse A, et al. Risk of Stroke and Death in Atrial Fibrillation by Type of Anticoagulation: A Propensity-Matched Analysis. *Pacing Clin Electrophysiol*. 2015;38:1310-1316.
35. Marques-Matos C, Alves JN, Marto JP, et al. POST-NOAC: Portuguese observational study of intracranial hemorrhage on non-vitamin K antagonist oral anticoagulants. *Int J Stroke*. 2017;12:623-627.
36. Naganuma M, Shiga T, Nagao T, Suzuki A, Murasaki K, Hagiwara N. Effectiveness and safety of dabigatran versus warfarin in "real-world" Japanese patients with atrial fibrillation: A single-center observational study. *J Arrhythm*. 2017;33:107-110.
37. Riley TR, Gauthier-Lewis ML, Sanchez CK, Riley TT. Evaluation of Bleeding Events Requiring Hospitalization in Patients With Atrial Fibrillation Receiving Dabigatran, Warfarin, or Antiplatelet Therapy. *J Pharm Pract*. 2017;30:214-218.
38. Saji N, Kimura K, Tateishi Y, et al; daVinci Study Group. Safety and efficacy of non-vitamin K oral anticoagulant treatment compared with warfarin in patients with non-valvular atrial fibrillation who develop acute ischemic stroke or transient ischemic attack: a multicenter prospective cohort study (daVinci study). *J Thromb Thrombolysis*. 2016;42:453-462.
39. Sherid M, Sifuentes H, Sulaiman S, et al. Gastrointestinal bleeding with dabigatran, a comparative study with warfarin: a multicenter experience. *Korean J Gastroenterol*. 2015;65:205-214.
40. Yap LB, Eng DT, Sivalingam L, et al. A Comparison of Dabigatran With Warfarin for Stroke Prevention in Atrial Fibrillation in an Asian Population. *Clin Appl Thromb Hemost*. 2016;22:792-797.
41. Yavuz B, Ayturk M, Ozkan S, et al. A real world data of dabigatran etexilate: multicenter registry of oral anticoagulants in nonvalvular atrial fibrillation. *J Thromb Thrombolysis*. 2016;42:399-404.
42. Abraham NS, Singh S, Alexander GC, et al. Comparative risk of gastrointestinal bleeding with dabigatran, rivaroxaban, and warfarin: population based cohort study. *BMJ*. 2015;350:h1857.
43. Ho CW, Ho MH, Chan PH, et al. Ischemic stroke and intracranial hemorrhage with aspirin, dabigatran, and warfarin: impact of quality of anticoagulation control. *Stroke*. 2015;46:23-30.
44. Lamberts M, Staerk L, Olesen JB, et al. Major Bleeding Complications and Persistence With Oral Anticoagulation in Non-Valvular Atrial Fibrillation: Contemporary Findings in Real-Life Danish Patients. *J Am Heart Assoc*. 2017;6:e004517.

45. Larsen TB, Rasmussen LH, Skjøth F, et al. Efficacy and safety of dabigatran etexilate and warfarin in "real-world" patients with atrial fibrillation: a prospective nationwide cohort study. *J Am Coll Cardiol*. 2013;61:2264-2273.
46. Lauffenburger JC, Farley JF, Gehi AK, Rhoney DH, Brookhart MA, Fang G. Effectiveness and safety of dabigatran and warfarin in real-world US patients with non-valvular atrial fibrillation: a retrospective cohort study. *J Am Heart Assoc*. 2015;4:e001798.
47. Lip GY, Waldo AL, Ip J, et al; IMPACT Investigators. Determinants of Time in Therapeutic Range in Patients Receiving Oral Anticoagulants (A Substudy of IMPACT). *Am J Cardiol*. 2016;118:1680-1684.
48. Staerk L, Gislason GH, Lip GY, et al. Risk of gastrointestinal adverse effects of dabigatran compared with warfarin among patients with atrial fibrillation: a nationwide cohort study. *Europace*. 2015;17:1215-1222.
49. Staerk L, Fosbøl EL, Lip GYH, et al. Ischaemic and haemorrhagic stroke associated with non-vitamin K antagonist oral anticoagulants and warfarin use in patients with atrial fibrillation: a nationwide cohort study. *Eur Heart J*. 2017;38:907-915.
50. Yao X, Abraham NS, Alexander GC, et al. Effect of Adherence to Oral Anticoagulants on Risk of Stroke and Major Bleeding Among Patients With Atrial Fibrillation. *J Am Heart Assoc*. 2016;5:e003074.
51. Li WH, Huang D, Chiang CE, et al. Efficacy and safety of dabigatran, rivaroxaban, and warfarin for stroke prevention in Chinese patients with atrial fibrillation: the Hong Kong Atrial Fibrillation Project. *Clin Cardiol*. 2017;40:222-229.
52. Larsen TB, Skjøth F, Nielsen PB, Kjældgaard JN, Lip GY. Comparative effectiveness and safety of non-vitamin K antagonist oral anticoagulants and warfarin in patients with atrial fibrillation: propensity weighted nationwide cohort study. *BMJ*. 2016;353:i3189.
53. Nielsen PB, Skjøth F, Søgaard M, Kjældgaard JN, Lip GY, Larsen TB. Effectiveness and safety of reduced dose non-vitamin K antagonist oral anticoagulants and warfarin in patients with atrial fibrillation: propensity weighted nationwide cohort study. *BMJ*. 2017;356:j510.
54. Bengtson LGS, Lutsey PL, Chen LY, MacLehose RF, Alonso A. Comparative effectiveness of dabigatran and rivaroxaban versus warfarin for the treatment of non-valvular atrial fibrillation. *J Cardiol*. 2017;69:868-876.

55. Lip GY, Pan X, Kamble S, et al. Major bleeding risk among non-valvular atrial fibrillation patients initiated on apixaban, dabigatran, rivaroxaban or warfarin: a "real-world" observational study in the United States. *Int J Clin Pract*. 2016;70:752-763.
56. Guo Y, Pisters R, Apostolakis S, et al. Stroke risk and suboptimal thromboprophylaxis in Chinese patients with atrial fibrillation: would the novel oral anticoagulants have an impact? *Int J Cardiol*. 2013;168:515-522.
57. Lip GY, Skjøth F, Rasmussen LH, Nielsen PB, Larsen TB. Net Clinical Benefit for Oral Anticoagulation, Aspirin, or No Therapy in Nonvalvular Atrial Fibrillation Patients With 1 Additional Risk Factor of the CHA2DS2-VASc Score (Beyond Sex). *J Am Coll Cardiol*. 2015;66:488-490.
58. Hernandez I, Zhang Y, Brooks MM, Chin PK, Saba S. Anticoagulation Use and Clinical Outcomes After Major Bleeding on Dabigatran or Warfarin in Atrial Fibrillation. *Stroke*. 2017;48:159-166.
59. Arihiro S, Todo K, Koga M, et al. Three-month risk-benefit profile of anticoagulation after stroke with atrial fibrillation: The SAMURAI-Nonvalvular Atrial Fibrillation (NVAf) study. *Int J Stroke*. 2016;11:565-574.
60. Avgil-Tsadok M, Jackevicius CA, Essebag V, et al. Dabigatran use in elderly patients with atrial fibrillation. *Thromb Haemost*. 2016;115:152-160.
61. Bouillon K, Bertrand M, Maura G, et al. Risk of bleeding and arterial thromboembolism in patients with nonvalvular atrial fibrillation either maintained on a vitamin K antagonist or switched to a non-vitamin K-antagonist oral anticoagulant: a retrospective, matched-cohort study. *Lancet Haematol*. 2015;2:e150-e159.
62. Chan Y-H, Kuo C-T, Yeh Y-H, Chang S-H, Wu L-S, Lee H-F, et al. Thromboembolic, Bleeding, and Mortality Risks of Rivaroxaban and Dabigatran in Asians With Nonvalvular Atrial Fibrillation. *J Am Coll Cardiol*. 2016;68:1389-1401.
63. Chan YH, Yen KC, See LC, et al. Cardiovascular, Bleeding, and Mortality Risks of Dabigatran in Asians with Nonvalvular Atrial Fibrillation. *Stroke*. 2016;47:441-449.
64. Chang HY, Zhou M, Tang W, et al. Risk of gastrointestinal bleeding associated with oral anticoagulants: population based retrospective cohort study. *BMJ*. 2015;350:h1585.
65. Coleman CI, Antz M, Bowrin K, et al. Real-world evidence of stroke prevention in patients with nonvalvular atrial fibrillation in the United States: the REVISIT-US study. *Curr Med Res Opin*. 2016;32:2047-2053.

66. Forslund T, Wettermark B, Andersen M, et al. Stroke and bleeding with nonvitamin K antagonist oral anticoagulant or warfarin treatment in patients with nonvalvular atrial fibrillation: a population-based cohort study. *Europace*. 2017. <https://doi.org/10.1093/europace/euw416>.
67. Gieling EM, van den Ham HA, van Onzenoort H, et al. Risk of major bleeding and stroke associated with the use of vitamin K antagonists, nonvitamin K antagonist oral anticoagulants and aspirin in patients with atrial fibrillation: a cohort study. *Br J Clin Pharmacol*. 2017. <https://doi.org/10.1111/bcp.13265>.
68. Graham DJ, Reichman ME, Wernecke M, et al. Cardiovascular, bleeding, and mortality risks in elderly Medicare patients treated with dabigatran or warfarin for nonvalvular atrial fibrillation. *Circulation*. 2015;131:157-164.
69. Graham DJ, Reichman ME, Wernecke M, et al. Stroke, Bleeding, and Mortality Risks in Elderly Medicare Beneficiaries Treated With Dabigatran or Rivaroxaban for Nonvalvular Atrial Fibrillation. *JAMA Intern Med*. 2016;176:1662-1671.
70. Halvorsen S, Ghanima W, Fride Tvete I, et al. A nationwide registry study to compare bleeding rates in patients with atrial fibrillation being prescribed oral anticoagulants. *Eur Heart J Cardiovasc Pharmacother*. 2017;3:28-36.
71. Hernandez I, Baik SH, Pinera A, et al. Risk of bleeding with dabigatran in atrial fibrillation. *JAMA Intern Med*. 2015;175:18-24.
72. Hernandez I, Zhang Y. Comparing Stroke and Bleeding with Rivaroxaban and Dabigatran in Atrial Fibrillation: Analysis of the US Medicare Part D Data. *Am J Cardiovasc Drugs*. 2017;17:37-47.
73. Hohnloser SH, Basic E, Nabauer M. Comparative risk of major bleeding with new oral anticoagulants (NOACs) and phenprocoumon in patients with atrial fibrillation: a postmarketing surveillance study. *Clin Res Cardiol*. 2017;106:618-628.
74. Lai CL, Chen HM, Liao MT, et al. Comparative Effectiveness and Safety of Dabigatran and Rivaroxaban in Atrial Fibrillation Patients. *J Am Heart Assoc*. 2017;6:e005362.
75. Laliberte F, Cloutier M, Nelson WW, et al. Real-world comparative effectiveness and safety of rivaroxaban and warfarin in nonvalvular atrial fibrillation patients. *Curr Med Res Opin*. 2014;30:1317-1325
76. Larsen TB, Gorst-Rasmussen A, Rasmussen LH, et al. Bleeding events among new starters and switchers to dabigatran compared with warfarin in atrial fibrillation. *Am J Med*. 2014;127:650-656.e5.

77. Larsen TB, Rasmussen LH, Gorst-Rasmussen A, et al. Dabigatran and warfarin for secondary prevention of stroke in atrial fibrillation patients: a nationwide cohort study. *Am J Med.* 2014;127:1172-1178.e5.
78. Li XS, Deitelzweig S, Keshishian A, et al. Effectiveness and safety of apixaban versus warfarin in non-valvular atrial fibrillation patients in "real-world" clinical practice. A propensity-matched analysis of 76,940 patients. *Thromb Haemost.* 2017;117:1072-1082.
79. Lip GY, Keshishian A, Kamble S, et al. Real-world comparison of major bleeding risk among non-valvular atrial fibrillation patients 136 initiated on apixaban, dabigatran, rivaroxaban, or warfarin. A propensity score matched analysis. *Thromb Haemost.* 2016;116:975-986.
80. Nishtala PS, Gnjjidic D, Jamieson HA, Hanger HC, Kaluarachchi C, Hilmer SN. "Real-world" haemorrhagic rates for warfarin and dabigatran using population-level data in New Zealand. *Int J Cardiol.* 2016;203:746-752.
81. Noseworthy PA, Yao X, Abraham NS, Sangaralingham LR, McBane RD, Shah ND. Direct Comparison of Dabigatran, Rivaroxaban, and Apixaban for Effectiveness and Safety in Nonvalvular Atrial Fibrillation. *Chest.* 2016;150:1302-1312.
82. Seeger JD, Bykov K, Bartels DB, et al. Safety and effectiveness of dabigatran and warfarin in routine care of patients with atrial fibrillation. *Thromb Haemost.* 2015;114:1277-1289.
83. Vaughan Sarrazin MS, Jones M, Mazur A, et al. Bleeding rates in Veterans Affairs patients with atrial fibrillation who switch from warfarin to dabigatran. *Am J Med.* 2014;127:1179-1185.
84. Villines TC, Schnee J, Fraeman K, et al. A comparison of the safety and effectiveness of dabigatran and warfarin in non-valvular atrial fibrillation patients in a large healthcare system. *Thromb Haemost.* 2015;114:1290-1298.
85. Yao X, Abraham NS, Sangaralingham LR, et al. Effectiveness and safety of dabigatran, rivaroxaban, and apixaban versus warfarin in nonvalvular atrial fibrillation. *J Am Heart Assoc.* 2016;5:e003725.

**Table 1 of the supplementary material**

Search Algorithms for Database Searches

| DATABASE                          | SEARCH ALGORITHM                                                                                                                                                                                                            |
|-----------------------------------|-----------------------------------------------------------------------------------------------------------------------------------------------------------------------------------------------------------------------------|
| MEDLINE<br>(PubMed)<br>20/04/2017 | #1 "Dabigatran"[Mesh] 1986                                                                                                                                                                                                  |
|                                   | #2 "Rivaroxaban"[Mesh] 1658                                                                                                                                                                                                 |
|                                   | #3 "Dabigatran"[nm] 1986                                                                                                                                                                                                    |
|                                   | #4 "Rivaroxaban"[nm] 1658                                                                                                                                                                                                   |
|                                   | #5 "edoxaban"[nm] 291                                                                                                                                                                                                       |
|                                   | #6 "apixaban"[nm] 893                                                                                                                                                                                                       |
|                                   | #7 oral anticoagula*[ti] 4625                                                                                                                                                                                               |
|                                   | #8 NOAC*[tiab] 1188                                                                                                                                                                                                         |
|                                   | #9 DOAC*[tiab] 466                                                                                                                                                                                                          |
|                                   | #10 dabigatran[tiab] 3209                                                                                                                                                                                                   |
|                                   | #11 apixaban[tiab] 1799                                                                                                                                                                                                     |
|                                   | #12 rivaroxaban[tiab] 2855                                                                                                                                                                                                  |
|                                   | #13 edoxaban[tiab] 728                                                                                                                                                                                                      |
|                                   | #14 #1 OR #2 OR #3 OR #4 OR #5 OR #6 OR #7 OR #8 OR #9 OR #10 OR #11 OR #12 OR #13 9668                                                                                                                                     |
|                                   | #15 "Warfarin"[Mesh] 16800                                                                                                                                                                                                  |
|                                   | #16 "Warfarin"[nm] 16800                                                                                                                                                                                                    |
|                                   | #17 warfarin[tiab] 20278                                                                                                                                                                                                    |
|                                   | #18 vitamin K antagonist*[tiab] 3966                                                                                                                                                                                        |
|                                   | #19 VKA[tiab] 1109                                                                                                                                                                                                          |
|                                   | #20 #15 OR #16 OR #17 OR #18 OR #19 28384                                                                                                                                                                                   |
|                                   | #21 #14 AND #20 4531                                                                                                                                                                                                        |
|                                   | #22 systematic[sb] 319651                                                                                                                                                                                                   |
|                                   | #23 #21 AND #22 486                                                                                                                                                                                                         |
|                                   | #24 #21 NOT #23 4045                                                                                                                                                                                                        |
|                                   | #25 "Atrial Fibrillation"[Mesh] 42760                                                                                                                                                                                       |
|                                   | #26 atrial fibrillation[tiab] 52480                                                                                                                                                                                         |
|                                   | #27 #25 OR #26 62436                                                                                                                                                                                                        |
|                                   | #28 #24 AND #27 2257                                                                                                                                                                                                        |
|                                   | #29 "Stroke"[Mesh] 104004                                                                                                                                                                                                   |
|                                   | #30 stroke[tiab] 187995                                                                                                                                                                                                     |
|                                   | #31 #29 OR #30 220619                                                                                                                                                                                                       |
|                                   | #32 #24 AND #31 1808                                                                                                                                                                                                        |
|                                   | #33 #28 OR #32 2401                                                                                                                                                                                                         |
|                                   | #34 (randomized controlled trial[pt] OR controlled clinical trial[pt] OR randomized[tiab] OR placebo[tiab] OR drug therapy[sh] OR randomly[tiab] OR trial[tiab] OR groups[tiab]) NOT (animals [mh] NOT humans [mh]) 3461777 |
|                                   | #35 #33 AND #34 1628                                                                                                                                                                                                        |
|                                   | #36 #33 NOT #35 773                                                                                                                                                                                                         |
|                                   | #37 "Comparative Study"[pt] 1761255                                                                                                                                                                                         |
|                                   | #38 "Cohort Studies"[Mesh] 1610475                                                                                                                                                                                          |
|                                   | #39 "Propensity Score"[Mesh] 3672                                                                                                                                                                                           |
|                                   | #40 "Registries"[Mesh] 71305                                                                                                                                                                                                |
|                                   | #41 cohort*[tiab] 401749                                                                                                                                                                                                    |
|                                   | #42 observational[ti] 18306                                                                                                                                                                                                 |
|                                   | #43 registr*[tiab] 162502                                                                                                                                                                                                   |
|                                   | #44 nationwide[tiab] 34597                                                                                                                                                                                                  |
|                                   | #45 administrative[tiab] 35085                                                                                                                                                                                              |
|                                   | #46 claims[tiab] 37903                                                                                                                                                                                                      |
|                                   | #47 propensity[tiab] 40617                                                                                                                                                                                                  |
|                                   | #48 #37 OR #38 OR #39 OR #40 OR #41 OR #42 OR #43 OR #44 OR #45 OR                                                                                                                                                          |



|                                                                   |                                                                                                                                                                                                                                                                                                                                                                                                                                                                                                                                                                                                                                                                                                                                                                                                                                                                                                                                                                                                                                                                                                                                                                                                                                                                                                                                                                                                                                                                                                                                  |
|-------------------------------------------------------------------|----------------------------------------------------------------------------------------------------------------------------------------------------------------------------------------------------------------------------------------------------------------------------------------------------------------------------------------------------------------------------------------------------------------------------------------------------------------------------------------------------------------------------------------------------------------------------------------------------------------------------------------------------------------------------------------------------------------------------------------------------------------------------------------------------------------------------------------------------------------------------------------------------------------------------------------------------------------------------------------------------------------------------------------------------------------------------------------------------------------------------------------------------------------------------------------------------------------------------------------------------------------------------------------------------------------------------------------------------------------------------------------------------------------------------------------------------------------------------------------------------------------------------------|
|                                                                   | #46 OR #47 3483871<br>#49 #36 AND #48 178<br>#50 real world[tiab] 21984<br>#51 #50 AND #35 84<br>#52 #49 OR #51 262<br>#53 #23 OR #35 OR #52 2292                                                                                                                                                                                                                                                                                                                                                                                                                                                                                                                                                                                                                                                                                                                                                                                                                                                                                                                                                                                                                                                                                                                                                                                                                                                                                                                                                                                |
| <b>EMBASE</b><br>Ovid EMBASE 1974 to<br>2017 May 04<br>05/05/2017 | 1 exp dabigatran/ (8519)<br>2 exp rivaroxaban/ (9537)<br>3 exp dabigatran/ (8519)<br>4 exp edoxaban/ (2024)<br>5 oral anticoagula*.ti. (6962)<br>6 NOAC*.ti,ab. (2373)<br>7 DOAC*.ti,ab. (756)<br>8 dabigatran.ti,ab. (6042)<br>9 apixaban.ti,ab. (3240)<br>10 rivaroxaban.ti,ab. (5569)<br>11 edoxaban.ti,ab. (1028)<br>12 1 or 2 or 3 or 4 or 5 or 6 or 7 or 8 or 9 or 10 or 11 (20002)<br>13 exp warfarin/ (77810)<br>14 warfarin.ti,ab. (31108)<br>15 vitamin K antagonist*.ti,ab. (6367)<br>16 VKA.ti,ab. (2366)<br>17 13 or 14 or 15 or 16 (84711)<br>18 exp atrial fibrillation/ (23981)<br>19 atrial fibrillation.ti,ab. (87233)<br>20 18 or 19 (93552)<br>21 exp cerebrovascular accident/ (144845)<br>22 stroke.ti,ab. (281422)<br>23 21 or 22 (327274)<br>24 20 or 23 (395950)<br>25 12 and 17 and 24 (6634)<br>26 conference.so. (334589)<br>27 25 not 26 (6350)<br>28 exp comparative effectiveness/ (30861)<br>29 Controlled Study/ (5355982)<br>30 Cohort Studies/ (168942)<br>31 exp propensity score/ (12496)<br>32 exp cohort analysis/ (284218)<br>33 exp propensity score/ (12496)<br>34 exp register/ (96627)<br>35 cohort*.ti,ab. (642060)<br>36 registr*.ti,ab. (222027)<br>37 nationwide.ti,ab. (48510)<br>38 administrative.ti,ab. (45967)<br>39 claims.ti,ab. (52149)<br>40 propensity.ti,ab. (53788)<br>41 observational.ti. (25334)<br>42 real world.ti,ab. (33695)<br>43 28 or 29 or 30 or 31 or 32 or 33 or 34 or 35 or 36 or 37 or 38 or 39 or 40 or<br>41 or 42 (6171570)<br>44 27 and 43 (1868) |

**Table 2 of the supplementary material**

## Risk of Bias Assessment for the Included Studies

| Study ID                                                                                                                                                      | Arihiro et al. <sup>59</sup>                                                                                   | Avgil-Tsadok et al. <sup>60</sup>                         | Bengtson et al. <sup>54</sup>                          | Bouillon et al. <sup>61</sup>                                                        | Chan et al. <sup>62</sup>                        |
|---------------------------------------------------------------------------------------------------------------------------------------------------------------|----------------------------------------------------------------------------------------------------------------|-----------------------------------------------------------|--------------------------------------------------------|--------------------------------------------------------------------------------------|--------------------------------------------------|
| <b>Cohort design</b>                                                                                                                                          | Prospective                                                                                                    | Retrospective                                             | Retrospective                                          | Nationwide                                                                           | Nationwide                                       |
| <b>Data source</b>                                                                                                                                            | Clinical registry                                                                                              | Administrative data                                       | Administrative data                                    | Administrative data                                                                  | Administrative data                              |
| <b>Primary outcome</b>                                                                                                                                        | Stroke or embolism and bleeding (major)                                                                        | Stroke or TIA, bleeding (any), and AMI                    | Stroke, bleeding, and AMI                              | Bleeding (any)                                                                       | Stroke, bleeding, AMI, and mortality             |
| <b>Confounding (baseline)</b><br>Researchers implemented appropriate methods to control for prognostic confounders                                            | <b>Low risk</b><br>Propensity score (unclear analysis)                                                         | <b>Low risk</b><br>Propensity score (matching)            | <b>Low risk</b><br>Propensity score (high dimensional) | <b>Moderate risk</b><br>Cox conditional model (matched adjustment)                   | <b>Low risk</b><br>Inverse probability weighting |
| <b>Confounding (of intervention)</b><br>Researchers implemented appropriate methods to avoid an impact of prognostic factors on the choice of drug prescribed | <b>No information</b>                                                                                          | <b>No information</b>                                     | <b>No information</b>                                  | <b>No information</b>                                                                | <b>No information</b>                            |
| <b>Selection bias</b><br>Researchers selected a sample of newly diagnosed patients or new drug users and measured outcomes from the start of treatment        | <b>Serious risk</b><br>AF diagnosed after a first stroke and patients had recently received their prescription | <b>Low risk</b>                                           | <b>Low risk</b>                                        | <b>Low risk</b><br>Study of switchers but index date for NOACs appropriately defined | <b>Low risk</b>                                  |
| <b>Selection bias</b><br>Researchers described any exclusion during eligibility                                                                               | <b>Low risk</b>                                                                                                | <b>Moderate risk</b><br>Reduced dabigatran doses excluded | <b>Low risk</b>                                        | <b>Low risk</b>                                                                      | <b>Low risk</b>                                  |
| <b>Bias in measurement of interventions</b><br>Researchers avoided the definition and categorization of interventions without knowledge of outcomes           | <b>Low risk</b>                                                                                                | <b>Low risk</b>                                           | <b>Low risk</b>                                        | <b>Low risk</b>                                                                      | <b>Low risk</b>                                  |

|                                                                                                                                                 |                                                                  |                                                                           |                 |                                                                          |                 |
|-------------------------------------------------------------------------------------------------------------------------------------------------|------------------------------------------------------------------|---------------------------------------------------------------------------|-----------------|--------------------------------------------------------------------------|-----------------|
| <b>Bias due to deviations from intended interventions</b><br>Researchers measured and controlled differences in co-interventions between groups | Low risk                                                         | Low risk                                                                  | Low risk        | Low risk                                                                 | Low risk        |
| <b>Missing data</b><br>Researchers measured and controlled differences in the extent of and reasons for missing data between groups             | Moderate risk<br>Missing data for drop outs                      | Low risk                                                                  | Low risk        | Low risk                                                                 | Low risk        |
| <b>Bias in outcome measurement</b><br>Researchers avoided different measures of outcomes depending on the drug                                  | Low risk                                                         | Low risk                                                                  | Low risk        | Low risk                                                                 | Low risk        |
| <b>Bias in the selection of reported findings</b><br>Researchers reported complete findings for the outcomes of interest                        | Serious risk<br>Main outcome findings reported only as composite | Moderate risk<br>Main outcome effect estimates reported only as composite | Low risk        | Moderate risk<br>Findings for composite outcome not described in Methods | Low risk        |
| <b>OVERALL RISK OF BIAS</b>                                                                                                                     | <b>SERIOUS</b>                                                   | <b>MODERATE</b>                                                           | <b>MODERATE</b> | <b>MODERATE</b>                                                          | <b>MODERATE</b> |

AMI, acute myocardial infarction; NOACs, nonvitamin K antagonist oral anticoagulants; TIA, transient ischemic attack.

| Study ID                                                                                                                                                      | Chan et al. <sup>63</sup>                 | Coleman et al. <sup>65</sup>            | Forslund et al. <sup>66</sup>             | Gielsing et al. <sup>67</sup>                        | Graham et al. <sup>68</sup>             | Graham et al. <sup>69</sup>               |
|---------------------------------------------------------------------------------------------------------------------------------------------------------------|-------------------------------------------|-----------------------------------------|-------------------------------------------|------------------------------------------------------|-----------------------------------------|-------------------------------------------|
| <b>Cohort design</b>                                                                                                                                          | Nationwide                                | Retrospective                           | Nationwide                                | Retrospective                                        | Retrospective                           | Retrospective                             |
| <b>Data source</b>                                                                                                                                            | Administrative data                       | Administrative data                     | Population registry                       | Primary care database                                | Administrative data                     | Administrative data                       |
| <b>Primary outcome</b>                                                                                                                                        | Stroke, bleeding, AMI, and mortality      | Stroke or bleeding (intracranial)       | Bleeding (major)                          | Bleeding (major)                                     | Stroke and major bleeding               | Stroke, major bleeding, and mortality     |
| <b>Confounding (baseline)</b><br>Researchers implemented an appropriate method to control for prognostic confounders                                          | Low risk<br>Inverse probability weighting | Low risk<br>Propensity score (matching) | Low risk<br>Inverse probability weighting | Moderate risk<br>Cox proportional hazards regression | Low risk<br>Propensity score (matching) | Low risk<br>Inverse probability weighting |
| <b>Confounding (of intervention)</b><br>Researchers implemented appropriate methods to avoid an impact of prognostic factors on the choice of drug prescribed | No information                            | No information                          | No information                            | No information                                       | No information                          | No information                            |
| <b>Selection bias</b>                                                                                                                                         | Low risk                                  | Low risk                                | Low risk                                  | Low risk                                             | Low risk                                | Low risk                                  |

|                                                                                                                                                     |                 |                 |                                                                                      |                                                                 |                 |                 |
|-----------------------------------------------------------------------------------------------------------------------------------------------------|-----------------|-----------------|--------------------------------------------------------------------------------------|-----------------------------------------------------------------|-----------------|-----------------|
| Researchers selected a sample of new drug users and measured outcomes from the start of treatment                                                   |                 |                 |                                                                                      |                                                                 |                 |                 |
| <b>Selection bias</b><br>Researchers described any exclusion during eligibility                                                                     | Low risk        | Low risk        | Low risk                                                                             | Low risk                                                        | Low risk        | Low risk        |
| <b>Bias in measurement of interventions</b><br>Researchers avoided the definition and categorization of interventions without knowledge of outcomes | Low risk        | Low risk        | Low risk                                                                             | Low risk                                                        | Low risk        | Low risk        |
| <b>Bias due to deviations from intended interventions</b><br>Researchers measured and controlled differences in co-interventions between groups     | Low risk        | Low risk        | Low risk                                                                             | Low risk                                                        | Low risk        | Low risk        |
| <b>Missing data</b><br>Researchers measured and controlled differences in the extent of and reasons for missing data between groups                 | Low risk        | Low risk        | Low risk                                                                             | Moderate risk<br>Excluded patients with the outcome at baseline | Low risk        | Low risk        |
| <b>Bias in outcome measurement</b><br>Researchers avoided different measures of outcomes depending on the drug                                      | Low risk        | Low risk        | Low risk                                                                             | Low risk                                                        | Low risk        | Low risk        |
| <b>Bias in the selection of reported findings</b><br>Researchers reported complete findings for the outcomes of interest                            | Low risk        | Low risk        | Moderate risk<br>Composite outcome reported in findings not described in the Methods | Low risk                                                        | Low risk        | Low risk        |
| <b>OVERALL RISK OF BIAS</b>                                                                                                                         | <b>MODERATE</b> | <b>MODERATE</b> | <b>MODERATE</b>                                                                      | <b>MODERATE</b>                                                 | <b>MODERATE</b> | <b>MODERATE</b> |

| Study ID                                                                                                             | Halvorsen et al. <sup>71</sup>                       | Hernandez et al. <sup>72</sup>            | Hernandez et al. <sup>73</sup>            | Hohnloser et al. <sup>74</sup>          | Laliberté et al. <sup>76</sup>          | Lai et al. <sup>75</sup>                |
|----------------------------------------------------------------------------------------------------------------------|------------------------------------------------------|-------------------------------------------|-------------------------------------------|-----------------------------------------|-----------------------------------------|-----------------------------------------|
| <b>Cohort design</b>                                                                                                 | Nationwide                                           | Retrospective                             | Retrospective                             | Retrospective                           | Retrospective                           | Nationwide                              |
| <b>Data source</b>                                                                                                   | Population registry                                  | Administrative data                       | Administrative data                       | Administrative data                     | Administrative data                     | Administrative data                     |
| <b>Primary outcome</b>                                                                                               | Bleeding (major or clinically relevant)              | Bleeding (any)                            | Stroke, other thromboembolism             | Bleeding (major)                        | Stroke or embolism and bleeding (any)   | Mortality                               |
| <b>Confounding (baseline)</b><br>Researchers implemented an appropriate method to control for prognostic confounders | Moderate risk<br>Cox proportional hazards regression | Low risk<br>Inverse probability weighting | Low risk<br>Inverse probability weighting | Low risk<br>Propensity score (matching) | Low risk<br>Propensity score (matching) | Low risk<br>Propensity score (matching) |

|                                                                                                                                                               |                 |                 |                 |                 |                 |                 |
|---------------------------------------------------------------------------------------------------------------------------------------------------------------|-----------------|-----------------|-----------------|-----------------|-----------------|-----------------|
| <b>Confounding (of intervention)</b><br>Researchers implemented appropriate methods to avoid an impact of prognostic factors on the choice of drug prescribed | No information  | No information  | No information  | No information  | No information  | No information  |
| <b>Selection bias</b><br>Researchers selected a sample of new drug users and measured outcomes from the start of treatment                                    | Low risk        | Low risk        | Low risk        | Low risk        | Low risk        | Low risk        |
| <b>Selection bias</b><br>Researchers described any exclusion during eligibility                                                                               | Low risk        | Low risk        | Low risk        | Low risk        | Low risk        | Low risk        |
| <b>Bias in measurement of interventions</b><br>Researchers avoided the definition and categorization of interventions without knowledge of outcomes           | Low risk        | Low risk        | Low risk        | Low risk        | Low risk        | Low risk        |
| <b>Bias due to deviations from intended interventions</b><br>Researchers measured and controlled differences in co-interventions between groups               | Low risk        | Low risk        | Low risk        | Low risk        | Low risk        | Low risk        |
| <b>Missing data</b><br>Researchers measured and controlled differences in the extent of and reasons for missing data between groups                           | Low risk        | Low risk        | Low risk        | Low risk        | Low risk        | Low risk        |
| <b>Bias in outcome measurement</b><br>Researchers avoided different measures of outcomes depending on the drug                                                | Low risk        | Low risk        | Low risk        | Low risk        | Low risk        | Low risk        |
| <b>Bias in the selection of reported findings</b><br>Researchers reported complete findings for the outcomes of interest                                      | Low risk        | Low risk        | Low risk        | Low risk        | Low risk        | Low risk        |
| <b>OVERALL RISK OF BIAS</b>                                                                                                                                   | <b>MODERATE</b> | <b>MODERATE</b> | <b>MODERATE</b> | <b>MODERATE</b> | <b>MODERATE</b> | <b>MODERATE</b> |

|                      |                                         |                                         |                               |                                |                                     |
|----------------------|-----------------------------------------|-----------------------------------------|-------------------------------|--------------------------------|-------------------------------------|
| <b>Study ID</b>      | <b>Larsen et al.<sup>76,77</sup>(*)</b> | <b>Larsen et al.<sup>52,53</sup>(*)</b> | <b>Li et al.<sup>79</sup></b> | <b>Lip et al.<sup>80</sup></b> | <b>Nishtala et al.<sup>81</sup></b> |
| <b>Cohort design</b> | Nationwide                              | Nationwide                              | Retrospective                 | Retrospective                  | Nationwide                          |
| <b>Data source</b>   | Population registry                     | Population registry                     | Administrative                | Administrative                 | Population registry                 |

|                                                                                                                                                               |                                                                    |                                                   |                                                |                                                             |                                                |
|---------------------------------------------------------------------------------------------------------------------------------------------------------------|--------------------------------------------------------------------|---------------------------------------------------|------------------------------------------------|-------------------------------------------------------------|------------------------------------------------|
|                                                                                                                                                               |                                                                    |                                                   | data                                           | data                                                        |                                                |
| <b>Primary outcome</b>                                                                                                                                        | Bleeding (any)                                                     | Stroke or embolism, mortality, and bleeding (any) | Stroke or embolism and bleeding (major)        | Bleeding (major)                                            | Bleeding (any)                                 |
| <b>Confounding (baseline)</b><br>Researchers implemented an appropriate method to control for prognostic confounders                                          | <b>Moderate risk</b><br>Cox conditional model (matched adjustment) | <b>Low risk</b><br>Inverse probability weighting  | <b>Low risk</b><br>Propensity score (matching) | <b>Moderate risk</b><br>Cox proportional hazards regression | <b>Low risk</b><br>Propensity score (matching) |
| <b>Confounding (of intervention)</b><br>Researchers implemented appropriate methods to avoid an impact of prognostic factors on the choice of drug prescribed | <b>No information</b>                                              | <b>No information</b>                             | <b>No information</b>                          | <b>No information</b>                                       | <b>No information</b>                          |
| <b>Selection bias</b><br>Researchers selected a sample of new drug users and measured outcomes from the start of treatment                                    | <b>Low risk</b>                                                    | <b>Low risk</b>                                   | <b>Low risk</b>                                | <b>Low risk</b>                                             | <b>Low risk</b>                                |
| <b>Selection bias</b><br>Researchers described any exclusion during eligibility                                                                               | <b>Low risk</b>                                                    | <b>Low risk</b>                                   | <b>Low risk</b>                                | <b>Low risk</b>                                             | <b>Low risk</b>                                |
| <b>Bias in measurement of interventions</b><br>Researchers avoided the definition and categorization of interventions without knowledge of outcomes           | <b>Low risk</b>                                                    | <b>Low risk</b>                                   | <b>Low risk</b>                                | <b>Low risk</b>                                             | <b>Low risk</b>                                |
| <b>Bias due to deviations from intended interventions</b><br>Researchers measured and controlled differences in co-interventions between groups               | <b>Low risk</b>                                                    | <b>Low risk</b>                                   | <b>Low risk</b>                                | <b>Low risk</b>                                             | <b>Low risk</b>                                |
| <b>Missing data</b><br>Researchers measured and controlled differences in the extent of and reasons for missing data between groups                           | <b>Low risk</b>                                                    | <b>Low risk</b>                                   | <b>Low risk</b>                                | <b>Low risk</b>                                             | <b>Low risk</b>                                |
| <b>Bias in outcome measurement</b><br>Researchers avoided different measures of                                                                               | <b>Low risk</b>                                                    | <b>Low risk</b>                                   | <b>Low risk</b>                                | <b>Low risk</b>                                             | <b>Low risk</b>                                |

|                                                                                                                          |                 |                 |                 |                 |                 |
|--------------------------------------------------------------------------------------------------------------------------|-----------------|-----------------|-----------------|-----------------|-----------------|
| outcomes depending on the drug                                                                                           |                 |                 |                 |                 |                 |
| <b>Bias in the selection of reported findings</b><br>Researchers reported complete findings for the outcomes of interest | <b>Low risk</b> | <b>Low risk</b> | <b>Low risk</b> | <b>Low risk</b> | <b>Low risk</b> |
| <b>OVERALL RISK OF BIAS</b>                                                                                              | <b>MODERATE</b> | <b>MODERATE</b> | <b>MODERATE</b> | <b>MODERATE</b> | <b>MODERATE</b> |

\*Larsen 2014 risk of bias assessment applies to Larsen 2014a and Larsen 2014b; Larsen 2016 risk of bias assessment also applies to Nielsen 2017

**Table 3 of the supplementary material**

## Characteristics of the Included Studies

|                                                                                                                    |                                                                                                                                                                                                                                                                                                                                                                                                                                                                                                                                                                                                             |            |             |            |                  |          |                  |       |      |      |      |      |      |                |             |            |            |            |            |           |   |   |   |   |   |           |   |   |   |   |   |           |   |   |   |   |   |
|--------------------------------------------------------------------------------------------------------------------|-------------------------------------------------------------------------------------------------------------------------------------------------------------------------------------------------------------------------------------------------------------------------------------------------------------------------------------------------------------------------------------------------------------------------------------------------------------------------------------------------------------------------------------------------------------------------------------------------------------|------------|-------------|------------|------------------|----------|------------------|-------|------|------|------|------|------|----------------|-------------|------------|------------|------------|------------|-----------|---|---|---|---|---|-----------|---|---|---|---|---|-----------|---|---|---|---|---|
| Study ID                                                                                                           | Arihiro et al. <sup>59</sup>                                                                                                                                                                                                                                                                                                                                                                                                                                                                                                                                                                                |            |             |            |                  |          |                  |       |      |      |      |      |      |                |             |            |            |            |            |           |   |   |   |   |   |           |   |   |   |   |   |           |   |   |   |   |   |
| Reference                                                                                                          | Arihiro S, Todo K, Koga M, Furui E, Kinoshita N, Kimura K, et al. Three-month risk-benefit profile of anticoagulation after stroke with atrial fibrillation: The SAMURAI-Nonvalvular Atrial Fibrillation (NVAF) study. <i>Int J Stroke</i> . 2016;11:565-574. doi:10.1177/1747493016632239                                                                                                                                                                                                                                                                                                                  |            |             |            |                  |          |                  |       |      |      |      |      |      |                |             |            |            |            |            |           |   |   |   |   |   |           |   |   |   |   |   |           |   |   |   |   |   |
| Objective                                                                                                          | To determine the risk-benefit profile within 3 months of warfarin or NOAC receipt in acute stroke/TIA                                                                                                                                                                                                                                                                                                                                                                                                                                                                                                       |            |             |            |                  |          |                  |       |      |      |      |      |      |                |             |            |            |            |            |           |   |   |   |   |   |           |   |   |   |   |   |           |   |   |   |   |   |
| Country                                                                                                            | Japan                                                                                                                                                                                                                                                                                                                                                                                                                                                                                                                                                                                                       |            |             |            |                  |          |                  |       |      |      |      |      |      |                |             |            |            |            |            |           |   |   |   |   |   |           |   |   |   |   |   |           |   |   |   |   |   |
| Design                                                                                                             | Prospective cohort study                                                                                                                                                                                                                                                                                                                                                                                                                                                                                                                                                                                    |            |             |            |                  |          |                  |       |      |      |      |      |      |                |             |            |            |            |            |           |   |   |   |   |   |           |   |   |   |   |   |           |   |   |   |   |   |
| Data source                                                                                                        | Web-based registration system, covering 18 Japanese stroke centers                                                                                                                                                                                                                                                                                                                                                                                                                                                                                                                                          |            |             |            |                  |          |                  |       |      |      |      |      |      |                |             |            |            |            |            |           |   |   |   |   |   |           |   |   |   |   |   |           |   |   |   |   |   |
| Time period                                                                                                        | September 2011 to March 2014                                                                                                                                                                                                                                                                                                                                                                                                                                                                                                                                                                                |            |             |            |                  |          |                  |       |      |      |      |      |      |                |             |            |            |            |            |           |   |   |   |   |   |           |   |   |   |   |   |           |   |   |   |   |   |
| NOAC<br>(all dosages are recommended for Japan)                                                                    | Dabigatran 300 mg or 220 mg daily<br>Rivaroxaban 15 mg or 10 mg daily<br>Apixaban 10 mg or 5 mg daily                                                                                                                                                                                                                                                                                                                                                                                                                                                                                                       |            |             |            |                  |          |                  |       |      |      |      |      |      |                |             |            |            |            |            |           |   |   |   |   |   |           |   |   |   |   |   |           |   |   |   |   |   |
| Control                                                                                                            | Warfarin<br>Target INR<br>2.0-3.0 for those < 70 years of age<br>1.6-2.6 for those ≥70 years of age                                                                                                                                                                                                                                                                                                                                                                                                                                                                                                         |            |             |            |                  |          |                  |       |      |      |      |      |      |                |             |            |            |            |            |           |   |   |   |   |   |           |   |   |   |   |   |           |   |   |   |   |   |
| Outcomes<br>(all assessed within 3 months of OAC initiation)                                                       | <b>Effectiveness</b><br>Stroke or systemic embolism<br>Any ischemic event (including recurrence of ischemic stroke or TIA, systemic embolism, acute coronary syndrome, aortic dissection, aortic aneurysm rupture, peripheral artery disease requiring hospitalization, venous thromboembolism, and revascularization such as carotid endarterectomy, carotid artery stenting, and percutaneous coronary intervention)<br>Ischemic stroke or TIA<br><b>Safety</b><br>Major bleeding<br>Intracranial hemorrhage<br>All-cause mortality                                                                       |            |             |            |                  |          |                  |       |      |      |      |      |      |                |             |            |            |            |            |           |   |   |   |   |   |           |   |   |   |   |   |           |   |   |   |   |   |
| Outcome definitions                                                                                                | Major bleeding was defined as fatal bleeding, symptomatic bleeding in a critical area or organ, or bleeding causing a fall in the hemoglobin level of 2.0 g/dL or more or leading to the transfusion of 2 or more units of whole blood or red blood cells                                                                                                                                                                                                                                                                                                                                                   |            |             |            |                  |          |                  |       |      |      |      |      |      |                |             |            |            |            |            |           |   |   |   |   |   |           |   |   |   |   |   |           |   |   |   |   |   |
| Population (eligibility)                                                                                           | Patients with nonvalvular AF who were hospitalized within 7 days of onset of ischemic stroke/TIA<br>Excluded: rheumatic mitral valve disease, a history of prosthetic valve replacement or mitral valve surgical repair, active infectious endocarditis, or lack of written informed consent                                                                                                                                                                                                                                                                                                                |            |             |            |                  |          |                  |       |      |      |      |      |      |                |             |            |            |            |            |           |   |   |   |   |   |           |   |   |   |   |   |           |   |   |   |   |   |
| Population (study sample)                                                                                          | <b>Study population</b><br>N = 1137<br>Warfarin, n = 662 (58.2%)<br>Dabigatran, n = 205 (18.0%)<br>Rivaroxaban, n = 245 (21.5%)<br>Apixaban, n = 25 (2.2%)<br><b>Target population</b><br>1192 patients; 55 patients not taking oral anticoagulants after the index stroke/TIA, mainly due to severe neurological deficits, were excluded                                                                                                                                                                                                                                                                   |            |             |            |                  |          |                  |       |      |      |      |      |      |                |             |            |            |            |            |           |   |   |   |   |   |           |   |   |   |   |   |           |   |   |   |   |   |
| <b>Population (baseline participant characteristics)</b> (values expressed as percentages unless otherwise stated) |                                                                                                                                                                                                                                                                                                                                                                                                                                                                                                                                                                                                             |            |             |            |                  |          |                  |       |      |      |      |      |      |                |             |            |            |            |            |           |   |   |   |   |   |           |   |   |   |   |   |           |   |   |   |   |   |
|                                                                                                                    | <table><tr><td></td><td>Apixaban</td><td>Dabigatran</td><td>Rivaroxaban</td><td>Warfarin</td><td>All participants</td></tr><tr><td>Women</td><td>32.0</td><td>33.0</td><td>38.7</td><td>48.8</td><td>43.3</td></tr><tr><td>Age, mean (SD)</td><td>74.0 (12.0)</td><td>73.1 (8.8)</td><td>75.8 (9.0)</td><td>79.3 (9.7)</td><td>77.7 (9.9)</td></tr><tr><td>&gt;65 years</td><td>-</td><td>-</td><td>-</td><td>-</td><td>-</td></tr><tr><td>&gt;75 years</td><td>-</td><td>-</td><td>-</td><td>-</td><td>-</td></tr><tr><td>&gt;85 years</td><td>-</td><td>-</td><td>-</td><td>-</td><td>-</td></tr></table> |            | Apixaban    | Dabigatran | Rivaroxaban      | Warfarin | All participants | Women | 32.0 | 33.0 | 38.7 | 48.8 | 43.3 | Age, mean (SD) | 74.0 (12.0) | 73.1 (8.8) | 75.8 (9.0) | 79.3 (9.7) | 77.7 (9.9) | >65 years | - | - | - | - | - | >75 years | - | - | - | - | - | >85 years | - | - | - | - | - |
|                                                                                                                    | Apixaban                                                                                                                                                                                                                                                                                                                                                                                                                                                                                                                                                                                                    | Dabigatran | Rivaroxaban | Warfarin   | All participants |          |                  |       |      |      |      |      |      |                |             |            |            |            |            |           |   |   |   |   |   |           |   |   |   |   |   |           |   |   |   |   |   |
| Women                                                                                                              | 32.0                                                                                                                                                                                                                                                                                                                                                                                                                                                                                                                                                                                                        | 33.0       | 38.7        | 48.8       | 43.3             |          |                  |       |      |      |      |      |      |                |             |            |            |            |            |           |   |   |   |   |   |           |   |   |   |   |   |           |   |   |   |   |   |
| Age, mean (SD)                                                                                                     | 74.0 (12.0)                                                                                                                                                                                                                                                                                                                                                                                                                                                                                                                                                                                                 | 73.1 (8.8) | 75.8 (9.0)  | 79.3 (9.7) | 77.7 (9.9)       |          |                  |       |      |      |      |      |      |                |             |            |            |            |            |           |   |   |   |   |   |           |   |   |   |   |   |           |   |   |   |   |   |
| >65 years                                                                                                          | -                                                                                                                                                                                                                                                                                                                                                                                                                                                                                                                                                                                                           | -          | -           | -          | -                |          |                  |       |      |      |      |      |      |                |             |            |            |            |            |           |   |   |   |   |   |           |   |   |   |   |   |           |   |   |   |   |   |
| >75 years                                                                                                          | -                                                                                                                                                                                                                                                                                                                                                                                                                                                                                                                                                                                                           | -          | -           | -          | -                |          |                  |       |      |      |      |      |      |                |             |            |            |            |            |           |   |   |   |   |   |           |   |   |   |   |   |           |   |   |   |   |   |
| >85 years                                                                                                          | -                                                                                                                                                                                                                                                                                                                                                                                                                                                                                                                                                                                                           | -          | -           | -          | -                |          |                  |       |      |      |      |      |      |                |             |            |            |            |            |           |   |   |   |   |   |           |   |   |   |   |   |           |   |   |   |   |   |



|                                                                                                                                                                            |                                                                                                                                                                                                 |         |         |         |         |
|----------------------------------------------------------------------------------------------------------------------------------------------------------------------------|-------------------------------------------------------------------------------------------------------------------------------------------------------------------------------------------------|---------|---------|---------|---------|
| <b>CHA<sub>2</sub>DS<sub>2</sub>VASc</b> , median (IQR)                                                                                                                    | 5 (4-6)                                                                                                                                                                                         | 5 (4-6) | 5 (4-6) | 6 (5-6) | 5 (4-6) |
| <b>CHA<sub>2</sub>DS<sub>2</sub></b> , median (IQR)                                                                                                                        | 4 (3-4)                                                                                                                                                                                         | 3 (3-4) | 4 (3-4) | 4 (3-5) | 4 (3-4) |
| <b>CHA<sub>2</sub>DS<sub>2</sub> ≥ 4</b>                                                                                                                                   | -                                                                                                                                                                                               | -       | -       | 70.7    | 62.3    |
| <b>HAS-BLED</b> , median (IQR)                                                                                                                                             | 3 (3-4)                                                                                                                                                                                         | 3 (3-4) | 3 (2-4) | 3 (3-4) | 3 (3-4) |
| <b>Standard dose</b>                                                                                                                                                       | -                                                                                                                                                                                               | 26.3    | 54.3    | -       | -       |
| <b>Reduced dose</b>                                                                                                                                                        | -                                                                                                                                                                                               | 73.7    | 45.7    | -       | -       |
| <b>Comorbidities</b>                                                                                                                                                       |                                                                                                                                                                                                 |         |         |         |         |
| Ischemic stroke, or systemic embolism, or TIA                                                                                                                              | 100                                                                                                                                                                                             | 100     | 100     | 100     | 100     |
| Heart failure                                                                                                                                                              | -                                                                                                                                                                                               | -       | -       | -       | -       |
| Myocardial infarction                                                                                                                                                      | -                                                                                                                                                                                               | -       | -       | -       | -       |
| Vascular disease                                                                                                                                                           | -                                                                                                                                                                                               | -       | -       | -       | -       |
| Renal dysfunction                                                                                                                                                          | -                                                                                                                                                                                               | -       | -       | -       | -       |
| Previous bleeding                                                                                                                                                          | -                                                                                                                                                                                               | -       | -       | -       | -       |
| Hypertension                                                                                                                                                               | -                                                                                                                                                                                               | -       | -       | -       | -       |
| Diabetes                                                                                                                                                                   | -                                                                                                                                                                                               | -       | -       | -       | -       |
| Cancer                                                                                                                                                                     | -                                                                                                                                                                                               | -       | -       | -       | -       |
| <b>Concomitant medication</b>                                                                                                                                              |                                                                                                                                                                                                 |         |         |         |         |
| Aspirin                                                                                                                                                                    | -                                                                                                                                                                                               | -       | -       | 15.3    | 14.5    |
| Beta-blocker                                                                                                                                                               | -                                                                                                                                                                                               | -       | -       | -       | -       |
| NSAID                                                                                                                                                                      | -                                                                                                                                                                                               | -       | -       | -       | -       |
| Calcium channel blocker                                                                                                                                                    | -                                                                                                                                                                                               | -       | -       | -       | -       |
| Renin angiotensin system inhibitor                                                                                                                                         | -                                                                                                                                                                                               | -       | -       | -       | -       |
| <b>Analysis</b>                                                                                                                                                            | <b>Measure of the risk of an end point</b>                                                                                                                                                      |         |         |         |         |
|                                                                                                                                                                            | Cumulative rates of primary and secondary events                                                                                                                                                |         |         |         |         |
|                                                                                                                                                                            | <b>Comparison of the risk of an end point between groups</b>                                                                                                                                    |         |         |         |         |
|                                                                                                                                                                            | Chi-square test                                                                                                                                                                                 |         |         |         |         |
|                                                                                                                                                                            | Cox proportional hazards model                                                                                                                                                                  |         |         |         |         |
|                                                                                                                                                                            | <b>Confounding</b>                                                                                                                                                                              |         |         |         |         |
|                                                                                                                                                                            | Cox proportional hazards model adjusted by potential confounding factors (sex, age, CHADS <sub>2</sub> score, admission National Institutes of Health Stroke Scale score, creatinine clearance) |         |         |         |         |
|                                                                                                                                                                            | <b>Sensitivity analysis</b>                                                                                                                                                                     |         |         |         |         |
|                                                                                                                                                                            | Not reported                                                                                                                                                                                    |         |         |         |         |
|                                                                                                                                                                            | <b>Supplementary analyses</b>                                                                                                                                                                   |         |         |         |         |
|                                                                                                                                                                            | Complementary analyses using propensity scores as an adjustment covariate                                                                                                                       |         |         |         |         |
|                                                                                                                                                                            | <b>Software for statistical analysis</b>                                                                                                                                                        |         |         |         |         |
| JMP 11.0.2 statistical software (SAS Institute, Inc, Cary, North Carolina)                                                                                                 |                                                                                                                                                                                                 |         |         |         |         |
| <b>Statistical significance reference</b>                                                                                                                                  |                                                                                                                                                                                                 |         |         |         |         |
| <i>P</i> < .05                                                                                                                                                             |                                                                                                                                                                                                 |         |         |         |         |
| INR, International Normalized Ratio; IQR, interquartile range; NOACs, nonvitamin K antagonist oral anticoagulants; SD, standard deviation; TIA, transient ischemic attack. |                                                                                                                                                                                                 |         |         |         |         |

|                                                                                                             |                                                                                                                                                                                                                                                                                                                                                                                                                                                                                                                                                                                                                                                                                                                                                                                                                                                                                                                  |                     |                     |                   |                     |                     |
|-------------------------------------------------------------------------------------------------------------|------------------------------------------------------------------------------------------------------------------------------------------------------------------------------------------------------------------------------------------------------------------------------------------------------------------------------------------------------------------------------------------------------------------------------------------------------------------------------------------------------------------------------------------------------------------------------------------------------------------------------------------------------------------------------------------------------------------------------------------------------------------------------------------------------------------------------------------------------------------------------------------------------------------|---------------------|---------------------|-------------------|---------------------|---------------------|
| Study ID                                                                                                    | Avgil-Tsadok et al. <sup>60</sup>                                                                                                                                                                                                                                                                                                                                                                                                                                                                                                                                                                                                                                                                                                                                                                                                                                                                                |                     |                     |                   |                     |                     |
| Reference                                                                                                   | Avgil-Tsadok M, Jackevicius CA, Essebag V, Eisenberg MJ, Rahme E, Behloul H, Pilote L. Dabigatran use in elderly patients with atrial fibrillation. <i>Thromb Haemost.</i> 2016;115:152-160. doi:10.1160/TH15-03-0247                                                                                                                                                                                                                                                                                                                                                                                                                                                                                                                                                                                                                                                                                            |                     |                     |                   |                     |                     |
| Objective                                                                                                   | To assess dabigatran effectiveness and safety in elderly patients in real-world practice                                                                                                                                                                                                                                                                                                                                                                                                                                                                                                                                                                                                                                                                                                                                                                                                                         |                     |                     |                   |                     |                     |
| Country                                                                                                     | Canada                                                                                                                                                                                                                                                                                                                                                                                                                                                                                                                                                                                                                                                                                                                                                                                                                                                                                                           |                     |                     |                   |                     |                     |
| Design                                                                                                      | Nationwide cohort study                                                                                                                                                                                                                                                                                                                                                                                                                                                                                                                                                                                                                                                                                                                                                                                                                                                                                          |                     |                     |                   |                     |                     |
| Data source                                                                                                 | Administrative databases in Quebec:<br>The provincial hospital discharge database ( <i>Maintenance et Exploitation des Données pour l'Étude de la Clientèle Hospitalière-Med-Echo</i> ) was linked to the provincial physician and prescription claims database ( <i>la Régie de l'assurance maladie du Québec [RAMQ]</i> ) using patients' encrypted health insurance numbers. Linkage using unique identifiers, such as health insurance numbers, is considered preferable to deterministic or probabilistic linkages using patient characteristics, such as age and sex. The Quebec prescription claims database has previously been determined to be a reliable source of filled medication prescriptions<br>The hospital discharge database was used to obtain information on patient characteristics such as comorbidities and to calculate the CHA <sub>2</sub> DS <sub>2</sub> -VASc and HAS-BLED scores |                     |                     |                   |                     |                     |
| Time period                                                                                                 | 1999-2013                                                                                                                                                                                                                                                                                                                                                                                                                                                                                                                                                                                                                                                                                                                                                                                                                                                                                                        |                     |                     |                   |                     |                     |
| NOAC                                                                                                        | <ul style="list-style-type: none"><li>• Dabigatran 110 mg</li><li>• Dabigatran 150 mg</li></ul>                                                                                                                                                                                                                                                                                                                                                                                                                                                                                                                                                                                                                                                                                                                                                                                                                  |                     |                     |                   |                     |                     |
| Control                                                                                                     | Warfarin                                                                                                                                                                                                                                                                                                                                                                                                                                                                                                                                                                                                                                                                                                                                                                                                                                                                                                         |                     |                     |                   |                     |                     |
| Outcomes                                                                                                    | <b>Effectiveness</b><br>Stroke/TIA<br><b>Safety</b><br>Bleeding events                                                                                                                                                                                                                                                                                                                                                                                                                                                                                                                                                                                                                                                                                                                                                                                                                                           |                     |                     |                   |                     |                     |
| Outcome definitions                                                                                         | Outcomes were defined using the International Classification of Diseases-9th/10th (ICD-9/10) revision, codes 427.3, 427.31, or 427.32/I48. Stroke was defined as ischemic cerebrovascular disease, with the inclusion of TIA and retinal infarct. Bleeding events included intracranial hemorrhage (ICH), gastrointestinal (GI) bleeding, and other hemorrhages. The outcomes of ICH and GI bleeding were also separately analyzed                                                                                                                                                                                                                                                                                                                                                                                                                                                                               |                     |                     |                   |                     |                     |
| Population (eligibility)                                                                                    | Participants were Quebec residents discharged alive from hospitalization with a primary diagnosis of AF or a major comorbid diagnosis (secondary diagnosis) of AF during the study period                                                                                                                                                                                                                                                                                                                                                                                                                                                                                                                                                                                                                                                                                                                        |                     |                     |                   |                     |                     |
| Population (study sample)                                                                                   | <b>Study population</b><br>< 75 years, N = 20 632<br>Warfarin, n = 14 262<br>Dabigatran 110 mg twice daily, n = 1277<br>Dabigatran 150 mg twice daily, n = 5093<br><br>≥ 75 years, N = 42 478<br>Warfarin, n = 32 930<br>Dabigatran 110 mg twice daily, n = 7649<br>Dabigatran 150 mg twice daily, n = 1899                                                                                                                                                                                                                                                                                                                                                                                                                                                                                                                                                                                                      |                     |                     |                   |                     |                     |
| Population (baseline participant characteristics) (values expressed as percentages unless otherwise stated) |                                                                                                                                                                                                                                                                                                                                                                                                                                                                                                                                                                                                                                                                                                                                                                                                                                                                                                                  |                     |                     |                   |                     |                     |
|                                                                                                             | < 75 (N = 20 632)                                                                                                                                                                                                                                                                                                                                                                                                                                                                                                                                                                                                                                                                                                                                                                                                                                                                                                |                     |                     | ≥ 75 (N = 42 478) |                     |                     |
|                                                                                                             | Warfarin                                                                                                                                                                                                                                                                                                                                                                                                                                                                                                                                                                                                                                                                                                                                                                                                                                                                                                         | Dabigatran (110 mg) | Dabigatran (150 mg) | Warfarin          | Dabigatran (110 mg) | Dabigatran (150 mg) |
| Women                                                                                                       | 38.5                                                                                                                                                                                                                                                                                                                                                                                                                                                                                                                                                                                                                                                                                                                                                                                                                                                                                                             | 41.5                | 35.3                | 56.9              | 57.2                | 45.6                |
| Age                                                                                                         | -                                                                                                                                                                                                                                                                                                                                                                                                                                                                                                                                                                                                                                                                                                                                                                                                                                                                                                                | -                   | -                   | -                 | -                   | -                   |
| >65 years                                                                                                   | -                                                                                                                                                                                                                                                                                                                                                                                                                                                                                                                                                                                                                                                                                                                                                                                                                                                                                                                | -                   | -                   | -                 | -                   | -                   |
| >75 years                                                                                                   | -                                                                                                                                                                                                                                                                                                                                                                                                                                                                                                                                                                                                                                                                                                                                                                                                                                                                                                                | -                   | -                   | -                 | -                   | -                   |
| >85 years                                                                                                   | -                                                                                                                                                                                                                                                                                                                                                                                                                                                                                                                                                                                                                                                                                                                                                                                                                                                                                                                | -                   | -                   | -                 | -                   | -                   |
| CHA <sub>2</sub> DS <sub>2</sub> VASc, mean (SD)                                                            | 2.3 (1.3)                                                                                                                                                                                                                                                                                                                                                                                                                                                                                                                                                                                                                                                                                                                                                                                                                                                                                                        | 2.4 (1.3)           | 2.0 (1.3)           | 3.8 (1.2)         | 3.7 (1.2)           | 3.2 (1.2)           |
| Modified HAS-BLED, mean (SD)                                                                                | 2.4 (1.2)                                                                                                                                                                                                                                                                                                                                                                                                                                                                                                                                                                                                                                                                                                                                                                                                                                                                                                        | 2.4 (1.1)           | 2.0 (1.0)           | 2.7 (1.0)         | 2.5 (1.0)           | 2.4 (1.0)           |

26

| <b>Standard dose</b>                                      |      |                                                                                                                                                                                                                                                                                                                                                                                                          |      |      |      |      |
|-----------------------------------------------------------|------|----------------------------------------------------------------------------------------------------------------------------------------------------------------------------------------------------------------------------------------------------------------------------------------------------------------------------------------------------------------------------------------------------------|------|------|------|------|
| <b>Reduced dose</b>                                       |      |                                                                                                                                                                                                                                                                                                                                                                                                          |      |      |      |      |
| <b>Comorbidities</b>                                      |      |                                                                                                                                                                                                                                                                                                                                                                                                          |      |      |      |      |
| Ischemic stroke, or systemic embolism, or TIA (see below) | -    | -                                                                                                                                                                                                                                                                                                                                                                                                        | -    | -    | -    | -    |
| History of stroke                                         | 10.2 | 8.8                                                                                                                                                                                                                                                                                                                                                                                                      | 9.1  | 12.2 | 11.6 | 11.6 |
| Heart failure (see below)                                 | -    | -                                                                                                                                                                                                                                                                                                                                                                                                        | -    | -    | -    | -    |
| Valvular heart disease                                    | 31.8 | 17.3                                                                                                                                                                                                                                                                                                                                                                                                     | 15.6 | 30.8 | 22.8 | 21.0 |
| Myocardial infarction                                     | 21.8 | 21.0                                                                                                                                                                                                                                                                                                                                                                                                     | 14.7 | 20.5 | 18.0 | 16.5 |
| Vascular disease                                          | 15.9 | 13.9                                                                                                                                                                                                                                                                                                                                                                                                     | 9.1  | 16.3 | 13.8 | 13.6 |
| Renal dysfunction (acute or chronic renal disease)        | 23.6 | 22.0                                                                                                                                                                                                                                                                                                                                                                                                     | 10.3 | 35.0 | 25.1 | 15.1 |
| Previous bleeding                                         | 10.1 | 10.1                                                                                                                                                                                                                                                                                                                                                                                                     | 5.4  | 11.5 | 9.5  | 8.7  |
| Hypertension                                              | 70.5 | 73.8                                                                                                                                                                                                                                                                                                                                                                                                     | 67.8 | 79.9 | 78.1 | 75.2 |
| Diabetes                                                  | 35.2 | 34.2                                                                                                                                                                                                                                                                                                                                                                                                     | 28.5 | 28.4 | 24.9 | 24.1 |
| Cancer (any malignancy)                                   | 8.7  | 11.0                                                                                                                                                                                                                                                                                                                                                                                                     | 7.7  | 11.5 | 9.5  | 8.7  |
| <b>Concomitant medication</b>                             |      |                                                                                                                                                                                                                                                                                                                                                                                                          |      |      |      |      |
| Aspirin                                                   | -    | -                                                                                                                                                                                                                                                                                                                                                                                                        | -    | -    | -    | -    |
| Beta-blocker (other than sotalol)                         | 42.1 | 35.5                                                                                                                                                                                                                                                                                                                                                                                                     | 38.2 | 46.8 | 39.9 | 41.0 |
| NSAID                                                     | 0.6  | 0.9                                                                                                                                                                                                                                                                                                                                                                                                      | 1.0  | 0.3  | 0.5  | 0.6  |
| Calcium channel blocker                                   | -    | -                                                                                                                                                                                                                                                                                                                                                                                                        | -    | -    | -    | -    |
| Renin angiotensin system inhibitor                        | -    | -                                                                                                                                                                                                                                                                                                                                                                                                        | -    | -    | -    | -    |
| ACE inhibitor                                             | 21.8 | 18.3                                                                                                                                                                                                                                                                                                                                                                                                     | 19.8 | 22.1 | 19.4 | 19.1 |
| Statin                                                    | 21.6 | 19.2                                                                                                                                                                                                                                                                                                                                                                                                     | 23.4 | 20.7 | 20.2 | 24.9 |
| Aspirin                                                   | 20.5 | 21.4                                                                                                                                                                                                                                                                                                                                                                                                     | 19.5 | 17.4 | 17.0 | 17.3 |
| Digoxin                                                   | 15.9 | 14.1                                                                                                                                                                                                                                                                                                                                                                                                     | 13.6 | 19.0 | 17.1 | 16.0 |
| Angiotensin receptor blocker                              | 11.3 | 12.2                                                                                                                                                                                                                                                                                                                                                                                                     | 14.1 | 13.7 | 13.8 | 16.5 |
| Diltiazem                                                 | 10.1 | 10.2                                                                                                                                                                                                                                                                                                                                                                                                     | 11.0 | 12.6 | 11.8 | 13.4 |
| Amiodarone                                                | 9.8  | 13.3                                                                                                                                                                                                                                                                                                                                                                                                     | 8.5  | 8.1  | 7.1  | 6.7  |
| Clopidogrel                                               | 2.5  | 4.2                                                                                                                                                                                                                                                                                                                                                                                                      | 1.9  | 1.7  | 2.3  | 1.9  |
| Other                                                     | 2.5  | 1.3                                                                                                                                                                                                                                                                                                                                                                                                      | 4.7  | 1.5  | 1.9  | 2.8  |
| antiarrhythmic                                            |      |                                                                                                                                                                                                                                                                                                                                                                                                          |      |      |      |      |
| Sotalol                                                   | 2.2  | 2.5                                                                                                                                                                                                                                                                                                                                                                                                      | 3.6  | 1.6  | 1.9  | 3.2  |
| Verapamil                                                 | 1.2  | 1.3                                                                                                                                                                                                                                                                                                                                                                                                      | 1.5  | 1.3  | 1.4  | 1.8  |
| <b>Analysis</b>                                           |      | <b>Measure of the risk of an end point</b>                                                                                                                                                                                                                                                                                                                                                               |      |      |      |      |
|                                                           |      | Crude Kaplan-Meier analysis was conducted to compare time to stroke and bleeding events in the 2 age groups for the 2 dabigatran doses and warfarin. The rate estimates were compared by the log-rank test                                                                                                                                                                                               |      |      |      |      |
|                                                           |      | To account for differences in baseline characteristics, 3 sets of propensity scores were calculated (ie, the predicted probability that a patient would be a user of dabigatran or warfarin, given baseline covariates) for (1) any dabigatran dose; (2) the 110 mg twice daily dose; and (3) the 150 mg twice daily dose. The propensity scores were calculated separately for the different age groups |      |      |      |      |
|                                                           |      | <b>Comparison of the risk of an end point between groups</b>                                                                                                                                                                                                                                                                                                                                             |      |      |      |      |
|                                                           |      | Cox proportional hazards models: in the multivariable Cox proportional hazards models, dabigatran use was considered a time-fixed binary variable, where it was assumed that patients who were prescribed dabigatran remained on the same prescription throughout the follow-up period. This approach is akin to intention-to-treat analyses in RCTs                                                     |      |      |      |      |

|                                                                                                                                                                                 |                                                                                                                                                                                                                                                                                                                                                                                                          |
|---------------------------------------------------------------------------------------------------------------------------------------------------------------------------------|----------------------------------------------------------------------------------------------------------------------------------------------------------------------------------------------------------------------------------------------------------------------------------------------------------------------------------------------------------------------------------------------------------|
|                                                                                                                                                                                 | <p><b>Sensitivity analysis</b><br/>The analyses were repeated by defining elderly patients as 80 years and older rather than 75 years and older</p> <p><b>Software for statistical analysis</b><br/>SAS (version 9.2) statistical software package (SAS Institute Inc, Cary, North Carolina)</p> <p><b>Statistical significance reference</b><br/>All statistical tests were 2-sided. <i>P</i>-value</p> |
| <p>ACE, angiotensin-converting enzyme; NSAID, nonsteroidal anti-inflammatory drugs; RCT, randomized clinical trial; SD, standard deviation; TIA, transient ischemic attack.</p> |                                                                                                                                                                                                                                                                                                                                                                                                          |

|                                                                                                                    |                                                                                                                                                                                                                                                                                                                                                                                                                                                                                                                                                                                                                                                                                                                                                                                                                              |             |             |             |                                  |             |                                  |  |  |            |          |            |          |             |          |       |      |      |      |      |      |      |                |             |             |             |             |             |             |           |   |   |   |   |   |   |           |   |   |   |   |   |   |           |   |   |   |   |   |   |
|--------------------------------------------------------------------------------------------------------------------|------------------------------------------------------------------------------------------------------------------------------------------------------------------------------------------------------------------------------------------------------------------------------------------------------------------------------------------------------------------------------------------------------------------------------------------------------------------------------------------------------------------------------------------------------------------------------------------------------------------------------------------------------------------------------------------------------------------------------------------------------------------------------------------------------------------------------|-------------|-------------|-------------|----------------------------------|-------------|----------------------------------|--|--|------------|----------|------------|----------|-------------|----------|-------|------|------|------|------|------|------|----------------|-------------|-------------|-------------|-------------|-------------|-------------|-----------|---|---|---|---|---|---|-----------|---|---|---|---|---|---|-----------|---|---|---|---|---|---|
| Study ID                                                                                                           | Bengtson et al. <sup>54</sup>                                                                                                                                                                                                                                                                                                                                                                                                                                                                                                                                                                                                                                                                                                                                                                                                |             |             |             |                                  |             |                                  |  |  |            |          |            |          |             |          |       |      |      |      |      |      |      |                |             |             |             |             |             |             |           |   |   |   |   |   |   |           |   |   |   |   |   |   |           |   |   |   |   |   |   |
| Reference                                                                                                          | Bengtson LGS, Lutsey PL, Chen LY, MacLehose RF, Alonso A. Comparative effectiveness of dabigatran and rivaroxaban versus warfarin for the treatment of non-valvular atrial fibrillation. <i>J Cardiol</i> . 2017;69:868-876. doi:10.1016/j.jjcc.2016.08.010                                                                                                                                                                                                                                                                                                                                                                                                                                                                                                                                                                  |             |             |             |                                  |             |                                  |  |  |            |          |            |          |             |          |       |      |      |      |      |      |      |                |             |             |             |             |             |             |           |   |   |   |   |   |   |           |   |   |   |   |   |   |           |   |   |   |   |   |   |
| Objective                                                                                                          | To evaluate if the effectiveness of dabigatran and rivaroxaban (vs warfarin) in ischemic stroke prevention differs between switchers from warfarin to NOACs and anticoagulant-naïve patients and to assess the overall safety profile of oral anticoagulants                                                                                                                                                                                                                                                                                                                                                                                                                                                                                                                                                                 |             |             |             |                                  |             |                                  |  |  |            |          |            |          |             |          |       |      |      |      |      |      |      |                |             |             |             |             |             |             |           |   |   |   |   |   |   |           |   |   |   |   |   |   |           |   |   |   |   |   |   |
| Country                                                                                                            | United States                                                                                                                                                                                                                                                                                                                                                                                                                                                                                                                                                                                                                                                                                                                                                                                                                |             |             |             |                                  |             |                                  |  |  |            |          |            |          |             |          |       |      |      |      |      |      |      |                |             |             |             |             |             |             |           |   |   |   |   |   |   |           |   |   |   |   |   |   |           |   |   |   |   |   |   |
| Design                                                                                                             | Retrospective cohort study                                                                                                                                                                                                                                                                                                                                                                                                                                                                                                                                                                                                                                                                                                                                                                                                   |             |             |             |                                  |             |                                  |  |  |            |          |            |          |             |          |       |      |      |      |      |      |      |                |             |             |             |             |             |             |           |   |   |   |   |   |   |           |   |   |   |   |   |   |           |   |   |   |   |   |   |
| Data source                                                                                                        | US MarketScan databases:<br>Truven Health MarketScan Commercial Claims and Encounters Database and the Medicare Supplemental and Coordination of Benefits Database (enrollment data and health insurance claims for inpatient and outpatient services as well as outpatient pharmacy services)                                                                                                                                                                                                                                                                                                                                                                                                                                                                                                                               |             |             |             |                                  |             |                                  |  |  |            |          |            |          |             |          |       |      |      |      |      |      |      |                |             |             |             |             |             |             |           |   |   |   |   |   |   |           |   |   |   |   |   |   |           |   |   |   |   |   |   |
| Time period                                                                                                        | January 1, 2009 through December 31, 2012                                                                                                                                                                                                                                                                                                                                                                                                                                                                                                                                                                                                                                                                                                                                                                                    |             |             |             |                                  |             |                                  |  |  |            |          |            |          |             |          |       |      |      |      |      |      |      |                |             |             |             |             |             |             |           |   |   |   |   |   |   |           |   |   |   |   |   |   |           |   |   |   |   |   |   |
| NOAC                                                                                                               | <ul style="list-style-type: none"><li>• Dabigatran 75 mg twice daily</li><li>• Dabigatran 150 mg twice daily</li><li>• Rivaroxaban 10 mg once daily</li><li>• Rivaroxaban 15 mg once daily</li><li>• Rivaroxaban 20 mg once daily</li></ul>                                                                                                                                                                                                                                                                                                                                                                                                                                                                                                                                                                                  |             |             |             |                                  |             |                                  |  |  |            |          |            |          |             |          |       |      |      |      |      |      |      |                |             |             |             |             |             |             |           |   |   |   |   |   |   |           |   |   |   |   |   |   |           |   |   |   |   |   |   |
| Control                                                                                                            | Warfarin                                                                                                                                                                                                                                                                                                                                                                                                                                                                                                                                                                                                                                                                                                                                                                                                                     |             |             |             |                                  |             |                                  |  |  |            |          |            |          |             |          |       |      |      |      |      |      |      |                |             |             |             |             |             |             |           |   |   |   |   |   |   |           |   |   |   |   |   |   |           |   |   |   |   |   |   |
| Outcomes                                                                                                           | <b>Effectiveness</b> <ul style="list-style-type: none"><li>• Ischemic stroke</li><li>• Myocardial infarction</li><li>• Hip/pelvic fracture</li></ul> <b>Safety</b> <ul style="list-style-type: none"><li>• Intracranial bleed</li><li>• Gastrointestinal bleed</li></ul>                                                                                                                                                                                                                                                                                                                                                                                                                                                                                                                                                     |             |             |             |                                  |             |                                  |  |  |            |          |            |          |             |          |       |      |      |      |      |      |      |                |             |             |             |             |             |             |           |   |   |   |   |   |   |           |   |   |   |   |   |   |           |   |   |   |   |   |   |
| Outcome definitions                                                                                                | Outcomes were defined based on International Classification of Diseases, Ninth Revision, Clinical Modification (ICD-9-CM) codes 427.3, 427.31, and 427.32, in any position                                                                                                                                                                                                                                                                                                                                                                                                                                                                                                                                                                                                                                                   |             |             |             |                                  |             |                                  |  |  |            |          |            |          |             |          |       |      |      |      |      |      |      |                |             |             |             |             |             |             |           |   |   |   |   |   |   |           |   |   |   |   |   |   |           |   |   |   |   |   |   |
| Population (eligibility)                                                                                           | Individuals with medical and outpatient pharmaceutical data, with ≥ 6 months of continuous enrollment prior to first anticoagulant use. Patients were eligible if they had at least 1 inpatient claim or 2 outpatient claims for AF and at least 1 prescription for warfarin or for 2 of the NOACs (dabigatran or rivaroxaban) after their initial AF diagnosis<br>Patients with ICD-9-CM diagnostic codes for valvular disease or procedure codes for valvular repair or replacement before or at AF diagnosis were excluded because NOACs have received FDA approval for nonvalvular AF only                                                                                                                                                                                                                               |             |             |             |                                  |             |                                  |  |  |            |          |            |          |             |          |       |      |      |      |      |      |      |                |             |             |             |             |             |             |           |   |   |   |   |   |   |           |   |   |   |   |   |   |           |   |   |   |   |   |   |
| Population (study sample)                                                                                          | <b>Study population</b><br>N = 61 648 anticoagulant initiators<br>Dabigatran, n = 18 981<br>Rivaroxaban, n = 2100<br>Warfarin, n = 40 567<br>N = 84 018 switchers<br>Dabigatran, n = 13 937<br>Rivaroxaban, n = 1202<br>Warfarin, n = 68 880                                                                                                                                                                                                                                                                                                                                                                                                                                                                                                                                                                                 |             |             |             |                                  |             |                                  |  |  |            |          |            |          |             |          |       |      |      |      |      |      |      |                |             |             |             |             |             |             |           |   |   |   |   |   |   |           |   |   |   |   |   |   |           |   |   |   |   |   |   |
| <b>Population (baseline participant characteristics)</b> (values expressed as percentages unless otherwise stated) |                                                                                                                                                                                                                                                                                                                                                                                                                                                                                                                                                                                                                                                                                                                                                                                                                              |             |             |             |                                  |             |                                  |  |  |            |          |            |          |             |          |       |      |      |      |      |      |      |                |             |             |             |             |             |             |           |   |   |   |   |   |   |           |   |   |   |   |   |   |           |   |   |   |   |   |   |
|                                                                                                                    | <table><tr><td></td><td colspan="2">New users</td><td colspan="2">Switchers</td><td colspan="2">Pooled (new users and switchers)</td></tr><tr><td></td><td>Dabigatran</td><td>Warfarin</td><td>Dabigatran</td><td>Warfarin</td><td>Rivaroxaban</td><td>Warfarin</td></tr><tr><td>Women</td><td>36.2</td><td>38.8</td><td>37.9</td><td>38.0</td><td>39.8</td><td>41.2</td></tr><tr><td>Age, mean (SD)</td><td>68.5 (12.3)</td><td>70.8 (12.1)</td><td>70.9 (11.3)</td><td>71.5 (11.4)</td><td>70.4 (12.0)</td><td>72.5 (12.2)</td></tr><tr><td>&gt;65 years</td><td>-</td><td>-</td><td>-</td><td>-</td><td>-</td><td>-</td></tr><tr><td>&gt;75 years</td><td>-</td><td>-</td><td>-</td><td>-</td><td>-</td><td>-</td></tr><tr><td>&gt;85 years</td><td>-</td><td>-</td><td>-</td><td>-</td><td>-</td><td>-</td></tr></table> |             | New users   |             | Switchers                        |             | Pooled (new users and switchers) |  |  | Dabigatran | Warfarin | Dabigatran | Warfarin | Rivaroxaban | Warfarin | Women | 36.2 | 38.8 | 37.9 | 38.0 | 39.8 | 41.2 | Age, mean (SD) | 68.5 (12.3) | 70.8 (12.1) | 70.9 (11.3) | 71.5 (11.4) | 70.4 (12.0) | 72.5 (12.2) | >65 years | - | - | - | - | - | - | >75 years | - | - | - | - | - | - | >85 years | - | - | - | - | - | - |
|                                                                                                                    | New users                                                                                                                                                                                                                                                                                                                                                                                                                                                                                                                                                                                                                                                                                                                                                                                                                    |             | Switchers   |             | Pooled (new users and switchers) |             |                                  |  |  |            |          |            |          |             |          |       |      |      |      |      |      |      |                |             |             |             |             |             |             |           |   |   |   |   |   |   |           |   |   |   |   |   |   |           |   |   |   |   |   |   |
|                                                                                                                    | Dabigatran                                                                                                                                                                                                                                                                                                                                                                                                                                                                                                                                                                                                                                                                                                                                                                                                                   | Warfarin    | Dabigatran  | Warfarin    | Rivaroxaban                      | Warfarin    |                                  |  |  |            |          |            |          |             |          |       |      |      |      |      |      |      |                |             |             |             |             |             |             |           |   |   |   |   |   |   |           |   |   |   |   |   |   |           |   |   |   |   |   |   |
| Women                                                                                                              | 36.2                                                                                                                                                                                                                                                                                                                                                                                                                                                                                                                                                                                                                                                                                                                                                                                                                         | 38.8        | 37.9        | 38.0        | 39.8                             | 41.2        |                                  |  |  |            |          |            |          |             |          |       |      |      |      |      |      |      |                |             |             |             |             |             |             |           |   |   |   |   |   |   |           |   |   |   |   |   |   |           |   |   |   |   |   |   |
| Age, mean (SD)                                                                                                     | 68.5 (12.3)                                                                                                                                                                                                                                                                                                                                                                                                                                                                                                                                                                                                                                                                                                                                                                                                                  | 70.8 (12.1) | 70.9 (11.3) | 71.5 (11.4) | 70.4 (12.0)                      | 72.5 (12.2) |                                  |  |  |            |          |            |          |             |          |       |      |      |      |      |      |      |                |             |             |             |             |             |             |           |   |   |   |   |   |   |           |   |   |   |   |   |   |           |   |   |   |   |   |   |
| >65 years                                                                                                          | -                                                                                                                                                                                                                                                                                                                                                                                                                                                                                                                                                                                                                                                                                                                                                                                                                            | -           | -           | -           | -                                | -           |                                  |  |  |            |          |            |          |             |          |       |      |      |      |      |      |      |                |             |             |             |             |             |             |           |   |   |   |   |   |   |           |   |   |   |   |   |   |           |   |   |   |   |   |   |
| >75 years                                                                                                          | -                                                                                                                                                                                                                                                                                                                                                                                                                                                                                                                                                                                                                                                                                                                                                                                                                            | -           | -           | -           | -                                | -           |                                  |  |  |            |          |            |          |             |          |       |      |      |      |      |      |      |                |             |             |             |             |             |             |           |   |   |   |   |   |   |           |   |   |   |   |   |   |           |   |   |   |   |   |   |
| >85 years                                                                                                          | -                                                                                                                                                                                                                                                                                                                                                                                                                                                                                                                                                                                                                                                                                                                                                                                                                            | -           | -           | -           | -                                | -           |                                  |  |  |            |          |            |          |             |          |       |      |      |      |      |      |      |                |             |             |             |             |             |             |           |   |   |   |   |   |   |           |   |   |   |   |   |   |           |   |   |   |   |   |   |
| CHA <sub>2</sub> DS <sub>2</sub> VASc, mean (SD)                                                                   |                                                                                                                                                                                                                                                                                                                                                                                                                                                                                                                                                                                                                                                                                                                                                                                                                              |             |             |             |                                  |             |                                  |  |  |            |          |            |          |             |          |       |      |      |      |      |      |      |                |             |             |             |             |             |             |           |   |   |   |   |   |   |           |   |   |   |   |   |   |           |   |   |   |   |   |   |
| HAS-BLED, mean (SD)                                                                                                |                                                                                                                                                                                                                                                                                                                                                                                                                                                                                                                                                                                                                                                                                                                                                                                                                              |             |             |             |                                  |             |                                  |  |  |            |          |            |          |             |          |       |      |      |      |      |      |      |                |             |             |             |             |             |             |           |   |   |   |   |   |   |           |   |   |   |   |   |   |           |   |   |   |   |   |   |

|                                               |                                                                                                                                                                                                                                                                                                                                                                                                                                                                                                                                                                                                                                                                                                                                                                                                                                                                                                                                                                                                                                                                                                                                                                                                                                                                                                                                                                                                                                                                                                                                                                                                                                                                                                                                                                                                                                                                                                                                                                                                                                                                                                                                                                                                                                                                                          |      |      |      |      |      |
|-----------------------------------------------|------------------------------------------------------------------------------------------------------------------------------------------------------------------------------------------------------------------------------------------------------------------------------------------------------------------------------------------------------------------------------------------------------------------------------------------------------------------------------------------------------------------------------------------------------------------------------------------------------------------------------------------------------------------------------------------------------------------------------------------------------------------------------------------------------------------------------------------------------------------------------------------------------------------------------------------------------------------------------------------------------------------------------------------------------------------------------------------------------------------------------------------------------------------------------------------------------------------------------------------------------------------------------------------------------------------------------------------------------------------------------------------------------------------------------------------------------------------------------------------------------------------------------------------------------------------------------------------------------------------------------------------------------------------------------------------------------------------------------------------------------------------------------------------------------------------------------------------------------------------------------------------------------------------------------------------------------------------------------------------------------------------------------------------------------------------------------------------------------------------------------------------------------------------------------------------------------------------------------------------------------------------------------------------|------|------|------|------|------|
| <b>Standard dose</b>                          | 91.7                                                                                                                                                                                                                                                                                                                                                                                                                                                                                                                                                                                                                                                                                                                                                                                                                                                                                                                                                                                                                                                                                                                                                                                                                                                                                                                                                                                                                                                                                                                                                                                                                                                                                                                                                                                                                                                                                                                                                                                                                                                                                                                                                                                                                                                                                     | -    | 93.4 | -    | -    | -    |
| <b>Reduced dose</b>                           | 8.3                                                                                                                                                                                                                                                                                                                                                                                                                                                                                                                                                                                                                                                                                                                                                                                                                                                                                                                                                                                                                                                                                                                                                                                                                                                                                                                                                                                                                                                                                                                                                                                                                                                                                                                                                                                                                                                                                                                                                                                                                                                                                                                                                                                                                                                                                      | -    | 6.6  | -    | -    | -    |
| <b>Comorbidities</b>                          |                                                                                                                                                                                                                                                                                                                                                                                                                                                                                                                                                                                                                                                                                                                                                                                                                                                                                                                                                                                                                                                                                                                                                                                                                                                                                                                                                                                                                                                                                                                                                                                                                                                                                                                                                                                                                                                                                                                                                                                                                                                                                                                                                                                                                                                                                          |      |      |      |      |      |
| Ischemic stroke, or systemic embolism, or TIA | 20.6                                                                                                                                                                                                                                                                                                                                                                                                                                                                                                                                                                                                                                                                                                                                                                                                                                                                                                                                                                                                                                                                                                                                                                                                                                                                                                                                                                                                                                                                                                                                                                                                                                                                                                                                                                                                                                                                                                                                                                                                                                                                                                                                                                                                                                                                                     | 22.3 | 25.4 | 24.0 | 26.3 | 30.9 |
| Heart failure                                 | 24.3                                                                                                                                                                                                                                                                                                                                                                                                                                                                                                                                                                                                                                                                                                                                                                                                                                                                                                                                                                                                                                                                                                                                                                                                                                                                                                                                                                                                                                                                                                                                                                                                                                                                                                                                                                                                                                                                                                                                                                                                                                                                                                                                                                                                                                                                                     | 30.4 | 35.2 | 36.6 | 31.5 | 39.3 |
| Myocardial infarction                         | 7.6                                                                                                                                                                                                                                                                                                                                                                                                                                                                                                                                                                                                                                                                                                                                                                                                                                                                                                                                                                                                                                                                                                                                                                                                                                                                                                                                                                                                                                                                                                                                                                                                                                                                                                                                                                                                                                                                                                                                                                                                                                                                                                                                                                                                                                                                                      | 9.5  | 7.6  | 9.2  | 10.5 | 11.7 |
| Vascular disease (see below)                  | -                                                                                                                                                                                                                                                                                                                                                                                                                                                                                                                                                                                                                                                                                                                                                                                                                                                                                                                                                                                                                                                                                                                                                                                                                                                                                                                                                                                                                                                                                                                                                                                                                                                                                                                                                                                                                                                                                                                                                                                                                                                                                                                                                                                                                                                                                        | -    | -    | -    | -    | -    |
| Peripheral arterial disease                   | 15.5                                                                                                                                                                                                                                                                                                                                                                                                                                                                                                                                                                                                                                                                                                                                                                                                                                                                                                                                                                                                                                                                                                                                                                                                                                                                                                                                                                                                                                                                                                                                                                                                                                                                                                                                                                                                                                                                                                                                                                                                                                                                                                                                                                                                                                                                                     | 18.0 | 19.8 | 20.3 | 21.4 | 25.6 |
| Renal dysfunction                             | 7.6                                                                                                                                                                                                                                                                                                                                                                                                                                                                                                                                                                                                                                                                                                                                                                                                                                                                                                                                                                                                                                                                                                                                                                                                                                                                                                                                                                                                                                                                                                                                                                                                                                                                                                                                                                                                                                                                                                                                                                                                                                                                                                                                                                                                                                                                                      | 12.9 | 10.0 | 13.0 | 11.2 | 16.0 |
| Previous bleeding (see below)                 | -                                                                                                                                                                                                                                                                                                                                                                                                                                                                                                                                                                                                                                                                                                                                                                                                                                                                                                                                                                                                                                                                                                                                                                                                                                                                                                                                                                                                                                                                                                                                                                                                                                                                                                                                                                                                                                                                                                                                                                                                                                                                                                                                                                                                                                                                                        | -    | -    | -    | -    | -    |
| GI bleed                                      | 7.6                                                                                                                                                                                                                                                                                                                                                                                                                                                                                                                                                                                                                                                                                                                                                                                                                                                                                                                                                                                                                                                                                                                                                                                                                                                                                                                                                                                                                                                                                                                                                                                                                                                                                                                                                                                                                                                                                                                                                                                                                                                                                                                                                                                                                                                                                      | 8.3  | 10.4 | 11.4 | 13.2 | 14.5 |
| Other bleed                                   | 3.6                                                                                                                                                                                                                                                                                                                                                                                                                                                                                                                                                                                                                                                                                                                                                                                                                                                                                                                                                                                                                                                                                                                                                                                                                                                                                                                                                                                                                                                                                                                                                                                                                                                                                                                                                                                                                                                                                                                                                                                                                                                                                                                                                                                                                                                                                      | 5.0  | 7.9  | 8.4  | 7.6  | 9.5  |
| Hypertension                                  | 75.2                                                                                                                                                                                                                                                                                                                                                                                                                                                                                                                                                                                                                                                                                                                                                                                                                                                                                                                                                                                                                                                                                                                                                                                                                                                                                                                                                                                                                                                                                                                                                                                                                                                                                                                                                                                                                                                                                                                                                                                                                                                                                                                                                                                                                                                                                     | 72.9 | 82.0 | 80.2 | 85.6 | 84.7 |
| Diabetes                                      | 28.6                                                                                                                                                                                                                                                                                                                                                                                                                                                                                                                                                                                                                                                                                                                                                                                                                                                                                                                                                                                                                                                                                                                                                                                                                                                                                                                                                                                                                                                                                                                                                                                                                                                                                                                                                                                                                                                                                                                                                                                                                                                                                                                                                                                                                                                                                     | 32.1 | 32.2 | 33.8 | 30.7 | 35.4 |
| Metastatic cancer                             | 1.6                                                                                                                                                                                                                                                                                                                                                                                                                                                                                                                                                                                                                                                                                                                                                                                                                                                                                                                                                                                                                                                                                                                                                                                                                                                                                                                                                                                                                                                                                                                                                                                                                                                                                                                                                                                                                                                                                                                                                                                                                                                                                                                                                                                                                                                                                      | 2.3  | 1.4  | 2.2  | 1.9  | 2.5  |
| <b>Concomitant medication</b>                 |                                                                                                                                                                                                                                                                                                                                                                                                                                                                                                                                                                                                                                                                                                                                                                                                                                                                                                                                                                                                                                                                                                                                                                                                                                                                                                                                                                                                                                                                                                                                                                                                                                                                                                                                                                                                                                                                                                                                                                                                                                                                                                                                                                                                                                                                                          |      |      |      |      |      |
| Aspirin (see below)                           | -                                                                                                                                                                                                                                                                                                                                                                                                                                                                                                                                                                                                                                                                                                                                                                                                                                                                                                                                                                                                                                                                                                                                                                                                                                                                                                                                                                                                                                                                                                                                                                                                                                                                                                                                                                                                                                                                                                                                                                                                                                                                                                                                                                                                                                                                                        | -    | -    | -    | -    | -    |
| Antiplatelet                                  | 2.1                                                                                                                                                                                                                                                                                                                                                                                                                                                                                                                                                                                                                                                                                                                                                                                                                                                                                                                                                                                                                                                                                                                                                                                                                                                                                                                                                                                                                                                                                                                                                                                                                                                                                                                                                                                                                                                                                                                                                                                                                                                                                                                                                                                                                                                                                      | 2.0  | 1.5  | 1.6  | 2.9  | 2.3  |
| Beta-blocker                                  | 71.1                                                                                                                                                                                                                                                                                                                                                                                                                                                                                                                                                                                                                                                                                                                                                                                                                                                                                                                                                                                                                                                                                                                                                                                                                                                                                                                                                                                                                                                                                                                                                                                                                                                                                                                                                                                                                                                                                                                                                                                                                                                                                                                                                                                                                                                                                     | 64.8 | 79.4 | 76.2 | 77.6 | 76.4 |
| NSAID                                         | -                                                                                                                                                                                                                                                                                                                                                                                                                                                                                                                                                                                                                                                                                                                                                                                                                                                                                                                                                                                                                                                                                                                                                                                                                                                                                                                                                                                                                                                                                                                                                                                                                                                                                                                                                                                                                                                                                                                                                                                                                                                                                                                                                                                                                                                                                        | -    | -    | -    | -    | -    |
| Calcium channel blocker                       | 41.7                                                                                                                                                                                                                                                                                                                                                                                                                                                                                                                                                                                                                                                                                                                                                                                                                                                                                                                                                                                                                                                                                                                                                                                                                                                                                                                                                                                                                                                                                                                                                                                                                                                                                                                                                                                                                                                                                                                                                                                                                                                                                                                                                                                                                                                                                     | 39.4 | 48.9 | 44.4 | 48.3 | 46.5 |
| Renin angiotensin system inhibitor            | -                                                                                                                                                                                                                                                                                                                                                                                                                                                                                                                                                                                                                                                                                                                                                                                                                                                                                                                                                                                                                                                                                                                                                                                                                                                                                                                                                                                                                                                                                                                                                                                                                                                                                                                                                                                                                                                                                                                                                                                                                                                                                                                                                                                                                                                                                        | -    | -    | -    | -    | -    |
| Digoxin                                       | 14.9                                                                                                                                                                                                                                                                                                                                                                                                                                                                                                                                                                                                                                                                                                                                                                                                                                                                                                                                                                                                                                                                                                                                                                                                                                                                                                                                                                                                                                                                                                                                                                                                                                                                                                                                                                                                                                                                                                                                                                                                                                                                                                                                                                                                                                                                                     | 16.2 | 28.9 | 27.6 | 21.9 | 25.3 |
| Clopidogrel                                   | 14.0                                                                                                                                                                                                                                                                                                                                                                                                                                                                                                                                                                                                                                                                                                                                                                                                                                                                                                                                                                                                                                                                                                                                                                                                                                                                                                                                                                                                                                                                                                                                                                                                                                                                                                                                                                                                                                                                                                                                                                                                                                                                                                                                                                                                                                                                                     | 12.0 | 10.8 | 10.1 | 15.7 | 13.0 |
| Angiotensin-converting enzyme inhibitor       | 36.0                                                                                                                                                                                                                                                                                                                                                                                                                                                                                                                                                                                                                                                                                                                                                                                                                                                                                                                                                                                                                                                                                                                                                                                                                                                                                                                                                                                                                                                                                                                                                                                                                                                                                                                                                                                                                                                                                                                                                                                                                                                                                                                                                                                                                                                                                     | 37.6 | 42.5 | 43.3 | 40.3 | 43.9 |
| Angiotensin receptor blocker                  | 23.5                                                                                                                                                                                                                                                                                                                                                                                                                                                                                                                                                                                                                                                                                                                                                                                                                                                                                                                                                                                                                                                                                                                                                                                                                                                                                                                                                                                                                                                                                                                                                                                                                                                                                                                                                                                                                                                                                                                                                                                                                                                                                                                                                                                                                                                                                     | 20.5 | 28.1 | 23.9 | 29.3 | 25.7 |
| Antiarrhythmic medication                     | 29.4                                                                                                                                                                                                                                                                                                                                                                                                                                                                                                                                                                                                                                                                                                                                                                                                                                                                                                                                                                                                                                                                                                                                                                                                                                                                                                                                                                                                                                                                                                                                                                                                                                                                                                                                                                                                                                                                                                                                                                                                                                                                                                                                                                                                                                                                                     | 20.4 | 39.3 | 29.1 | 41.5 | 29.4 |
| Statin                                        | 54.3                                                                                                                                                                                                                                                                                                                                                                                                                                                                                                                                                                                                                                                                                                                                                                                                                                                                                                                                                                                                                                                                                                                                                                                                                                                                                                                                                                                                                                                                                                                                                                                                                                                                                                                                                                                                                                                                                                                                                                                                                                                                                                                                                                                                                                                                                     | 51.7 | 64.2 | 61.5 | 61.3 | 62.5 |
| Diabetes medication                           | 21.5                                                                                                                                                                                                                                                                                                                                                                                                                                                                                                                                                                                                                                                                                                                                                                                                                                                                                                                                                                                                                                                                                                                                                                                                                                                                                                                                                                                                                                                                                                                                                                                                                                                                                                                                                                                                                                                                                                                                                                                                                                                                                                                                                                                                                                                                                     | 23.7 | 24.0 | 24.8 | 21.2 | 24.8 |
| <b>Analysis</b>                               | <p><b>Measure of the risk of an end point</b></p> <p>Cox proportional hazards models were used to assess the association between anticoagulant type (separately for dabigatran and rivaroxaban vs warfarin) and the time to each outcome. Propensity score-adjusted Cox regression was used to calculate hazard ratios and 95% confidence intervals for relevant end points in NOACs vs warfarin users.</p> <p><b>Comparison of the risk of an end point between groups</b></p> <p>Separate analyses were conducted to compare anticoagulant-naïve users of NOACs and those switching from warfarin.</p> <p>High-dimensional propensity scores were calculated for each of the main comparisons. The methodology included the following dimensions: age, sex, inpatient diagnostic codes, inpatient procedure codes, outpatient diagnostic codes, outpatient procedure codes, and outpatient pharmacy claims. High-dimensional propensity scores were calculated with Rassen's SAS macros and included both empirical variables and the covariates described above. For each outcome, Cox proportional hazards models were adjusted for the high-dimensional propensity score decile as well as the age, sex, and CHADS<sub>2</sub> score, to allow stratification of the results by these 3 covariates.</p> <p><b>Sensitivity analysis</b></p> <p>A sensitivity analysis was performed among high-dimensional propensity score-matched dabigatran and warfarin users.</p> <p>A greedy matching technique, which is an efficient approximation of a nearest neighbor matching approach, where the comparator with the closest propensity score is selected, was implemented with a published SAS macro for the matched analysis. Kaplan-Meier survival curves were used to calculate the survival-free probability of each outcome of interest separately for dabigatran and warfarin new users and switchers. Effect measure modification by sex, age (<math>\leq 75</math> and <math>&gt; 75</math>), and CHADS<sub>2</sub> score (0-1 classified as low risk and <math>\geq 2</math> classified as moderate/high risk) was explored via stratified analysis. Due to the small number of rivaroxaban users and correspondingly few events, new users and switchers were pooled for</p> |      |      |      |      |      |

|                                                                             |                                                                                                                                                                                                         |
|-----------------------------------------------------------------------------|---------------------------------------------------------------------------------------------------------------------------------------------------------------------------------------------------------|
|                                                                             | <p>analysis</p> <p><b>Software for statistical analysis</b></p> <p>SAS 9.3</p> <p><b>Statistical significance reference</b></p> <p><math>P &lt; .05</math> was considered statistically significant</p> |
| NOACs, nonvitamin K antagonist oral anticoagulants; SD, standard deviation. |                                                                                                                                                                                                         |

|                                  |                                                                                                                                                                                                                                                                                                                                                                                                                                                                                                                                                                                                                                                                                                                                                                                                                                                                                                                                                                                                                                                                                                                                                           |
|----------------------------------|-----------------------------------------------------------------------------------------------------------------------------------------------------------------------------------------------------------------------------------------------------------------------------------------------------------------------------------------------------------------------------------------------------------------------------------------------------------------------------------------------------------------------------------------------------------------------------------------------------------------------------------------------------------------------------------------------------------------------------------------------------------------------------------------------------------------------------------------------------------------------------------------------------------------------------------------------------------------------------------------------------------------------------------------------------------------------------------------------------------------------------------------------------------|
| <b>Study ID</b>                  | Bouillon et al. <sup>61</sup>                                                                                                                                                                                                                                                                                                                                                                                                                                                                                                                                                                                                                                                                                                                                                                                                                                                                                                                                                                                                                                                                                                                             |
| <b>Reference</b>                 | Bouillon K, Bertrand M, Maura G, Blotière PO, Ricordeau P, Zureik M. Risk of bleeding and arterial thromboembolism in patients with non-valvular atrial fibrillation either maintained on a vitamin K antagonist or switched to a non-vitamin K-antagonist oral anticoagulant: a retrospective, matched-cohort study. <i>Lancet Haematol.</i> 2015;2:e150-59. doi:10.1016/S2352-3026(15)00027-7                                                                                                                                                                                                                                                                                                                                                                                                                                                                                                                                                                                                                                                                                                                                                           |
| <b>Objective</b>                 | To compare the risk of bleeding between individuals who switched and those who remained on a vitamin K antagonist (nonswitchers) in real-world conditions                                                                                                                                                                                                                                                                                                                                                                                                                                                                                                                                                                                                                                                                                                                                                                                                                                                                                                                                                                                                 |
| <b>Country</b>                   | France                                                                                                                                                                                                                                                                                                                                                                                                                                                                                                                                                                                                                                                                                                                                                                                                                                                                                                                                                                                                                                                                                                                                                    |
| <b>Design</b>                    | Nationwide cohort study                                                                                                                                                                                                                                                                                                                                                                                                                                                                                                                                                                                                                                                                                                                                                                                                                                                                                                                                                                                                                                                                                                                                   |
| <b>Data source</b>               | The French national health insurance database ( <i>Système National d'Information Inter-Régimes de l'Assurance Maladie</i> [SNIIRAM]) contains anonymized individual data on all reimbursements for patient health expenditure, including drugs and outpatient medical and nursing care, that have been prescribed or done by health care professionals. The SNIIRAM database does not provide any direct information on the medical indication for each reimbursement but does contain the patient's status with respect to full reimbursement of care related to severe and costly long-term conditions listed in the International Classification of Diseases, 10th edition (ICD-10). The SNIIRAM also includes important status information but not cause of death. Information from the SNIIRAM database was also cross-referenced to the French hospital discharge data base ( <i>Programme de Medicalisation des Systemes d'Information</i> [PMSI]), which provides medical information on all patients admitted to hospital in France, including discharge diagnoses coded in the ICD-10, medical procedures, and French diagnosis-related groups |
| <b>Time period</b>               | January 1, 2011, and November 30, 2012                                                                                                                                                                                                                                                                                                                                                                                                                                                                                                                                                                                                                                                                                                                                                                                                                                                                                                                                                                                                                                                                                                                    |
| <b>NOAC</b>                      | Dabigatran<br>Rivaroxaban                                                                                                                                                                                                                                                                                                                                                                                                                                                                                                                                                                                                                                                                                                                                                                                                                                                                                                                                                                                                                                                                                                                                 |
| <b>Control</b>                   | Vitamin K antagonists (acenocoumarol, fluindione, warfarin)                                                                                                                                                                                                                                                                                                                                                                                                                                                                                                                                                                                                                                                                                                                                                                                                                                                                                                                                                                                                                                                                                               |
| <b>Outcomes</b>                  | <b>Effectiveness</b> <ul style="list-style-type: none"> <li>• Ischemic stroke</li> <li>• Systemic embolism</li> <li>• First or recurrent myocardial infarction</li> <li>• Death</li> <li>• Composite outcomes</li> </ul> <b>Safety</b> <ul style="list-style-type: none"> <li>• Bleeding events</li> </ul>                                                                                                                                                                                                                                                                                                                                                                                                                                                                                                                                                                                                                                                                                                                                                                                                                                                |
| <b>Outcome definitions</b>       | Outcomes were defined based on the ICD-10                                                                                                                                                                                                                                                                                                                                                                                                                                                                                                                                                                                                                                                                                                                                                                                                                                                                                                                                                                                                                                                                                                                 |
| <b>Population (eligibility)</b>  | Patients who were aged 18 years or older; had their first prescription of a vitamin K antagonist between January 1, 2011, and November 30, 2012, without having had a vitamin K antagonist reimbursed in the 12 months before January 1, 2011; and were starting vitamin K antagonists for nonvalvular atrial fibrillation. In France, 3 vitamin K antagonists are available—fluindione, warfarin, and acenocoumarol. Patients who had switched from one type of vitamin K antagonist to another and those who had dementia were excluded. Because all individuals on a vitamin K antagonist could theoretically have been switched to a NOAC, patients with contraindications for NOACs were also excluded—ie, those with surgery for valvular heart disease, recent cancer, dialysis for kidney failure, current or recent gastroduodenal ulceration, hepatic impairment or liver disease, and any lesion or condition with a substantial risk of severe bleeding such as anemia                                                                                                                                                                        |
| <b>Population (study sample)</b> | <b>Study population</b><br>N = 17 410 (10 705 nonswitchers, 6705 switchers)<br><b>Target population</b><br>N = 445 735 eligible individuals identified in the SNIIRAM registry<br>Excluded:<br>N = 106 914 <ul style="list-style-type: none"> <li>• Age &lt; 18 years, n = 1506</li> <li>• Switched from 1 type of VKA to another, n = 16 513</li> <li>• Had a prescription of 2 different oral anticoagulants, n = 680</li> <li>• Had heart valve disease or surgery for this condition, n = 33 090</li> <li>• Had cancer, 23 918</li> </ul>                                                                                                                                                                                                                                                                                                                                                                                                                                                                                                                                                                                                             |



|                                                                                                                    |                                                                                                                                                                                                                                                                                                                                                                                                                                                                                                                                                                                                                                                                                                                                                                                                                                                                                                                                                                                                                                                                                                                                                                                                                                                                                                                                                                                                                                                                                                                                                                                        |                  |
|--------------------------------------------------------------------------------------------------------------------|----------------------------------------------------------------------------------------------------------------------------------------------------------------------------------------------------------------------------------------------------------------------------------------------------------------------------------------------------------------------------------------------------------------------------------------------------------------------------------------------------------------------------------------------------------------------------------------------------------------------------------------------------------------------------------------------------------------------------------------------------------------------------------------------------------------------------------------------------------------------------------------------------------------------------------------------------------------------------------------------------------------------------------------------------------------------------------------------------------------------------------------------------------------------------------------------------------------------------------------------------------------------------------------------------------------------------------------------------------------------------------------------------------------------------------------------------------------------------------------------------------------------------------------------------------------------------------------|------------------|
|                                                                                                                    | <ul style="list-style-type: none"><li>• Were receiving kidney dialysis, n = 1926</li><li>• Had anemia or another blood disorder, n = 38 308</li><li>• Had cirrhosis, fibrosis, or liver failure, n = 5704</li><li>• Had a gastroduodenal ulcer, n = 793</li><li>• Had undergone lower limb surgery, n = 9740</li></ul> <p>N = 199 578</p> <ul style="list-style-type: none"><li>• Unswitched and unmatched individuals, n = 141 206</li><li>• Switched but unmatched individuals, n = 1777</li><li>• Unswitched, matched individuals with a duration of VKA treatment shorter than that of switched individuals, n = 56 595</li></ul> <p>N = 43 624</p> <ul style="list-style-type: none"><li>• Used a VKA or DOA ≤ 0 day after the index date, n = 10 596</li><li>• Died before the index date, n = 145</li><li>• Had an index date ≥ 1 December 1, 2012, n = 1980</li><li>• Admitted to hospital 45 days before the index date, n = 11 951</li><li>• Had dementia, n = 4007</li><li>• Were switched or unswitched individuals without their matching pair, n = 14 945</li></ul> <p>N = 57 868 unswitched individuals excluded because of different INR numbers between switched and unswitched individuals</p> <p>N = 20 341</p> <ul style="list-style-type: none"><li>• Unswitched individuals not randomly selected, n = 8670</li><li>• Switched individuals without their matching pair, n = 4261</li><li>• Unswitched and switched individuals with an oral anticoagulation indication for DVT/PE or a nondetermined indication, n = 7410 unswitched and 2815 switched</li></ul> |                  |
| <b>Population (baseline participant characteristics)</b> (values expressed as percentages unless otherwise stated) |                                                                                                                                                                                                                                                                                                                                                                                                                                                                                                                                                                                                                                                                                                                                                                                                                                                                                                                                                                                                                                                                                                                                                                                                                                                                                                                                                                                                                                                                                                                                                                                        |                  |
|                                                                                                                    | <b>Nonswitchers</b>                                                                                                                                                                                                                                                                                                                                                                                                                                                                                                                                                                                                                                                                                                                                                                                                                                                                                                                                                                                                                                                                                                                                                                                                                                                                                                                                                                                                                                                                                                                                                                    | <b>Switchers</b> |
| <b>Women</b>                                                                                                       | 48                                                                                                                                                                                                                                                                                                                                                                                                                                                                                                                                                                                                                                                                                                                                                                                                                                                                                                                                                                                                                                                                                                                                                                                                                                                                                                                                                                                                                                                                                                                                                                                     | 48               |
| <b>Age</b>                                                                                                         |                                                                                                                                                                                                                                                                                                                                                                                                                                                                                                                                                                                                                                                                                                                                                                                                                                                                                                                                                                                                                                                                                                                                                                                                                                                                                                                                                                                                                                                                                                                                                                                        |                  |
| >65 years                                                                                                          | -                                                                                                                                                                                                                                                                                                                                                                                                                                                                                                                                                                                                                                                                                                                                                                                                                                                                                                                                                                                                                                                                                                                                                                                                                                                                                                                                                                                                                                                                                                                                                                                      | -                |
| 67-82 years                                                                                                        | 75                                                                                                                                                                                                                                                                                                                                                                                                                                                                                                                                                                                                                                                                                                                                                                                                                                                                                                                                                                                                                                                                                                                                                                                                                                                                                                                                                                                                                                                                                                                                                                                     | 75               |
| >85 years                                                                                                          | -                                                                                                                                                                                                                                                                                                                                                                                                                                                                                                                                                                                                                                                                                                                                                                                                                                                                                                                                                                                                                                                                                                                                                                                                                                                                                                                                                                                                                                                                                                                                                                                      | -                |
| <b>Modified CHA<sub>2</sub>DS<sub>2</sub>VASc, median (IQR)</b>                                                    | 4 (3-4)                                                                                                                                                                                                                                                                                                                                                                                                                                                                                                                                                                                                                                                                                                                                                                                                                                                                                                                                                                                                                                                                                                                                                                                                                                                                                                                                                                                                                                                                                                                                                                                | 3 (2-4)          |
| <b>Modified HAS-BLED, median (IQR)</b>                                                                             | 2 (2-3)                                                                                                                                                                                                                                                                                                                                                                                                                                                                                                                                                                                                                                                                                                                                                                                                                                                                                                                                                                                                                                                                                                                                                                                                                                                                                                                                                                                                                                                                                                                                                                                | 2 (2-3)          |
| <b>Standard dose</b>                                                                                               |                                                                                                                                                                                                                                                                                                                                                                                                                                                                                                                                                                                                                                                                                                                                                                                                                                                                                                                                                                                                                                                                                                                                                                                                                                                                                                                                                                                                                                                                                                                                                                                        |                  |
| <b>Reduced dose</b>                                                                                                |                                                                                                                                                                                                                                                                                                                                                                                                                                                                                                                                                                                                                                                                                                                                                                                                                                                                                                                                                                                                                                                                                                                                                                                                                                                                                                                                                                                                                                                                                                                                                                                        |                  |
| <b>Comorbidities</b>                                                                                               |                                                                                                                                                                                                                                                                                                                                                                                                                                                                                                                                                                                                                                                                                                                                                                                                                                                                                                                                                                                                                                                                                                                                                                                                                                                                                                                                                                                                                                                                                                                                                                                        |                  |
| Ischemic stroke, or systemic embolism, or TIA                                                                      | 1                                                                                                                                                                                                                                                                                                                                                                                                                                                                                                                                                                                                                                                                                                                                                                                                                                                                                                                                                                                                                                                                                                                                                                                                                                                                                                                                                                                                                                                                                                                                                                                      | 1                |
| Heart failure                                                                                                      | 47                                                                                                                                                                                                                                                                                                                                                                                                                                                                                                                                                                                                                                                                                                                                                                                                                                                                                                                                                                                                                                                                                                                                                                                                                                                                                                                                                                                                                                                                                                                                                                                     | 46               |
| Myocardial infarction                                                                                              |                                                                                                                                                                                                                                                                                                                                                                                                                                                                                                                                                                                                                                                                                                                                                                                                                                                                                                                                                                                                                                                                                                                                                                                                                                                                                                                                                                                                                                                                                                                                                                                        |                  |
| Vascular disease (see below)                                                                                       | -                                                                                                                                                                                                                                                                                                                                                                                                                                                                                                                                                                                                                                                                                                                                                                                                                                                                                                                                                                                                                                                                                                                                                                                                                                                                                                                                                                                                                                                                                                                                                                                      | -                |
| Peripheral arterial disease                                                                                        | 3                                                                                                                                                                                                                                                                                                                                                                                                                                                                                                                                                                                                                                                                                                                                                                                                                                                                                                                                                                                                                                                                                                                                                                                                                                                                                                                                                                                                                                                                                                                                                                                      | 2                |
| Renal dysfunction (see below)                                                                                      | -                                                                                                                                                                                                                                                                                                                                                                                                                                                                                                                                                                                                                                                                                                                                                                                                                                                                                                                                                                                                                                                                                                                                                                                                                                                                                                                                                                                                                                                                                                                                                                                      | -                |
| Chronic renal impairment                                                                                           | 3                                                                                                                                                                                                                                                                                                                                                                                                                                                                                                                                                                                                                                                                                                                                                                                                                                                                                                                                                                                                                                                                                                                                                                                                                                                                                                                                                                                                                                                                                                                                                                                      | 2                |
| Previous bleeding                                                                                                  |                                                                                                                                                                                                                                                                                                                                                                                                                                                                                                                                                                                                                                                                                                                                                                                                                                                                                                                                                                                                                                                                                                                                                                                                                                                                                                                                                                                                                                                                                                                                                                                        |                  |
| Intracranial                                                                                                       | <1                                                                                                                                                                                                                                                                                                                                                                                                                                                                                                                                                                                                                                                                                                                                                                                                                                                                                                                                                                                                                                                                                                                                                                                                                                                                                                                                                                                                                                                                                                                                                                                     | <1               |
| Gastrointestinal                                                                                                   | <1                                                                                                                                                                                                                                                                                                                                                                                                                                                                                                                                                                                                                                                                                                                                                                                                                                                                                                                                                                                                                                                                                                                                                                                                                                                                                                                                                                                                                                                                                                                                                                                     | <1               |
| Other                                                                                                              | <1                                                                                                                                                                                                                                                                                                                                                                                                                                                                                                                                                                                                                                                                                                                                                                                                                                                                                                                                                                                                                                                                                                                                                                                                                                                                                                                                                                                                                                                                                                                                                                                     | <1               |
| Hypertension                                                                                                       | 86                                                                                                                                                                                                                                                                                                                                                                                                                                                                                                                                                                                                                                                                                                                                                                                                                                                                                                                                                                                                                                                                                                                                                                                                                                                                                                                                                                                                                                                                                                                                                                                     | 84               |
| Diabetes                                                                                                           | 20                                                                                                                                                                                                                                                                                                                                                                                                                                                                                                                                                                                                                                                                                                                                                                                                                                                                                                                                                                                                                                                                                                                                                                                                                                                                                                                                                                                                                                                                                                                                                                                     | 17               |
| Cancer                                                                                                             | -                                                                                                                                                                                                                                                                                                                                                                                                                                                                                                                                                                                                                                                                                                                                                                                                                                                                                                                                                                                                                                                                                                                                                                                                                                                                                                                                                                                                                                                                                                                                                                                      | -                |

|                                                                                                                                               |                                                                                                                                                                                                                                                                                                                                                                                                                                                                                                                                                                                                                                                                      |    |
|-----------------------------------------------------------------------------------------------------------------------------------------------|----------------------------------------------------------------------------------------------------------------------------------------------------------------------------------------------------------------------------------------------------------------------------------------------------------------------------------------------------------------------------------------------------------------------------------------------------------------------------------------------------------------------------------------------------------------------------------------------------------------------------------------------------------------------|----|
| <b>Concomitant medication</b>                                                                                                                 |                                                                                                                                                                                                                                                                                                                                                                                                                                                                                                                                                                                                                                                                      |    |
| Aspirin (antiplatelet agents)                                                                                                                 | 22                                                                                                                                                                                                                                                                                                                                                                                                                                                                                                                                                                                                                                                                   | 24 |
| Beta-blocker                                                                                                                                  | -                                                                                                                                                                                                                                                                                                                                                                                                                                                                                                                                                                                                                                                                    | -  |
| NSAID                                                                                                                                         | 6                                                                                                                                                                                                                                                                                                                                                                                                                                                                                                                                                                                                                                                                    | 8  |
| Calcium channel blocker                                                                                                                       | -                                                                                                                                                                                                                                                                                                                                                                                                                                                                                                                                                                                                                                                                    | -  |
| Renin angiotensin system inhibitor                                                                                                            | -                                                                                                                                                                                                                                                                                                                                                                                                                                                                                                                                                                                                                                                                    | -  |
| <b>Analysis</b>                                                                                                                               | <b>Measure of the risk of an end point</b>                                                                                                                                                                                                                                                                                                                                                                                                                                                                                                                                                                                                                           |    |
|                                                                                                                                               | Chi-square tests and <i>t</i> tests were used to assess the similarity of switchers and nonswitchers according to the matching variables. Additionally, the standardized difference between these groups was calculated as the difference in means or proportions divided by the pooled SD. An imbalance between the groups was defined as an absolute value greater than 0.10. Univariate associations between exposure and covariates were analyzed with chi-square and Fisher's exact tests for classified variables, as well as a Cochran-Mantel-Haenszel trend test for ordered variables and a <i>t</i> test and analysis of variance for continuous variables |    |
|                                                                                                                                               | <b>Comparison of the risk of an end point between groups</b>                                                                                                                                                                                                                                                                                                                                                                                                                                                                                                                                                                                                         |    |
|                                                                                                                                               | A log-rank test was used to examine differences between switchers and nonswitchers in the occurrence of events. For the multivariate analysis, a conditional Cox model was used to estimate hazard ratios and their 95% confidence intervals of bleeding, ischemic stroke or systemic embolism, myocardial infarction, and of composite events, at a median follow-up of 10 months (interquartile range, 9.8-10.0)                                                                                                                                                                                                                                                   |    |
|                                                                                                                                               | <b>Software for statistical analysis</b>                                                                                                                                                                                                                                                                                                                                                                                                                                                                                                                                                                                                                             |    |
|                                                                                                                                               | SAS software, version 9.3                                                                                                                                                                                                                                                                                                                                                                                                                                                                                                                                                                                                                                            |    |
| CI, confidence interval; DOACs, direct oral anticoagulants; DVT, deep venous thrombosis; PE, pulmonary embolism; VKAs, vitamin K antagonists. |                                                                                                                                                                                                                                                                                                                                                                                                                                                                                                                                                                                                                                                                      |    |

|                                                                                                                                 |                                                                                                                                                                                                                                                                                                                                                                                                                                                                                                                                                                                                                                                                                                                                                                                                                                                                                                                                                                                                                                                                                                                                                                                                    |                   |                    |                   |                         |                 |                         |              |   |    |    |    |    |                       |   |        |        |         |   |           |   |    |    |    |    |           |   |    |    |    |    |           |   |    |    |    |    |                                                     |   |           |           |           |   |                            |   |           |           |           |   |                                                                                                                                 |   |    |    |   |   |                     |   |    |    |   |   |
|---------------------------------------------------------------------------------------------------------------------------------|----------------------------------------------------------------------------------------------------------------------------------------------------------------------------------------------------------------------------------------------------------------------------------------------------------------------------------------------------------------------------------------------------------------------------------------------------------------------------------------------------------------------------------------------------------------------------------------------------------------------------------------------------------------------------------------------------------------------------------------------------------------------------------------------------------------------------------------------------------------------------------------------------------------------------------------------------------------------------------------------------------------------------------------------------------------------------------------------------------------------------------------------------------------------------------------------------|-------------------|--------------------|-------------------|-------------------------|-----------------|-------------------------|--------------|---|----|----|----|----|-----------------------|---|--------|--------|---------|---|-----------|---|----|----|----|----|-----------|---|----|----|----|----|-----------|---|----|----|----|----|-----------------------------------------------------|---|-----------|-----------|-----------|---|----------------------------|---|-----------|-----------|-----------|---|---------------------------------------------------------------------------------------------------------------------------------|---|----|----|---|---|---------------------|---|----|----|---|---|
| Study ID                                                                                                                        | Chan et al. <sup>62</sup>                                                                                                                                                                                                                                                                                                                                                                                                                                                                                                                                                                                                                                                                                                                                                                                                                                                                                                                                                                                                                                                                                                                                                                          |                   |                    |                   |                         |                 |                         |              |   |    |    |    |    |                       |   |        |        |         |   |           |   |    |    |    |    |           |   |    |    |    |    |           |   |    |    |    |    |                                                     |   |           |           |           |   |                            |   |           |           |           |   |                                                                                                                                 |   |    |    |   |   |                     |   |    |    |   |   |
| Reference                                                                                                                       | Chan YH, Kuo CT, Yeh YH, Chang SH, Wu LS, Lee HF, et al. Thromboembolic, bleeding, and mortality risks of rivaroxaban and dabigatran in Asians with nonvalvular atrial fibrillation. <i>J Am Coll Cardiol</i> . 2016;68:1389-1401. doi:10.1016/j.jacc.2016.06.062                                                                                                                                                                                                                                                                                                                                                                                                                                                                                                                                                                                                                                                                                                                                                                                                                                                                                                                                  |                   |                    |                   |                         |                 |                         |              |   |    |    |    |    |                       |   |        |        |         |   |           |   |    |    |    |    |           |   |    |    |    |    |           |   |    |    |    |    |                                                     |   |           |           |           |   |                            |   |           |           |           |   |                                                                                                                                 |   |    |    |   |   |                     |   |    |    |   |   |
| Objective                                                                                                                       | To compare the risk for thromboembolic events, bleeding, and mortality associated with rivaroxaban and dabigatran vs warfarin in Asians with nonvalvular atrial fibrillation (NVAf)                                                                                                                                                                                                                                                                                                                                                                                                                                                                                                                                                                                                                                                                                                                                                                                                                                                                                                                                                                                                                |                   |                    |                   |                         |                 |                         |              |   |    |    |    |    |                       |   |        |        |         |   |           |   |    |    |    |    |           |   |    |    |    |    |           |   |    |    |    |    |                                                     |   |           |           |           |   |                            |   |           |           |           |   |                                                                                                                                 |   |    |    |   |   |                     |   |    |    |   |   |
| Country                                                                                                                         | Taiwan                                                                                                                                                                                                                                                                                                                                                                                                                                                                                                                                                                                                                                                                                                                                                                                                                                                                                                                                                                                                                                                                                                                                                                                             |                   |                    |                   |                         |                 |                         |              |   |    |    |    |    |                       |   |        |        |         |   |           |   |    |    |    |    |           |   |    |    |    |    |           |   |    |    |    |    |                                                     |   |           |           |           |   |                            |   |           |           |           |   |                                                                                                                                 |   |    |    |   |   |                     |   |    |    |   |   |
| Design                                                                                                                          | Nationwide retrospective cohort study                                                                                                                                                                                                                                                                                                                                                                                                                                                                                                                                                                                                                                                                                                                                                                                                                                                                                                                                                                                                                                                                                                                                                              |                   |                    |                   |                         |                 |                         |              |   |    |    |    |    |                       |   |        |        |         |   |           |   |    |    |    |    |           |   |    |    |    |    |           |   |    |    |    |    |                                                     |   |           |           |           |   |                            |   |           |           |           |   |                                                                                                                                 |   |    |    |   |   |                     |   |    |    |   |   |
| Data source                                                                                                                     | Taiwan National Health Insurance Research Database, covering > 99% of the Taiwanese population in 2014                                                                                                                                                                                                                                                                                                                                                                                                                                                                                                                                                                                                                                                                                                                                                                                                                                                                                                                                                                                                                                                                                             |                   |                    |                   |                         |                 |                         |              |   |    |    |    |    |                       |   |        |        |         |   |           |   |    |    |    |    |           |   |    |    |    |    |           |   |    |    |    |    |                                                     |   |           |           |           |   |                            |   |           |           |           |   |                                                                                                                                 |   |    |    |   |   |                     |   |    |    |   |   |
| Time period                                                                                                                     | February 2013 to December 2013                                                                                                                                                                                                                                                                                                                                                                                                                                                                                                                                                                                                                                                                                                                                                                                                                                                                                                                                                                                                                                                                                                                                                                     |                   |                    |                   |                         |                 |                         |              |   |    |    |    |    |                       |   |        |        |         |   |           |   |    |    |    |    |           |   |    |    |    |    |           |   |    |    |    |    |                                                     |   |           |           |           |   |                            |   |           |           |           |   |                                                                                                                                 |   |    |    |   |   |                     |   |    |    |   |   |
| NOAC                                                                                                                            | Dabigatran 300 mg or 220 mg daily<br>Rivaroxaban 20 mg or 15 mg or 10 mg daily                                                                                                                                                                                                                                                                                                                                                                                                                                                                                                                                                                                                                                                                                                                                                                                                                                                                                                                                                                                                                                                                                                                     |                   |                    |                   |                         |                 |                         |              |   |    |    |    |    |                       |   |        |        |         |   |           |   |    |    |    |    |           |   |    |    |    |    |           |   |    |    |    |    |                                                     |   |           |           |           |   |                            |   |           |           |           |   |                                                                                                                                 |   |    |    |   |   |                     |   |    |    |   |   |
| Control                                                                                                                         | Warfarin                                                                                                                                                                                                                                                                                                                                                                                                                                                                                                                                                                                                                                                                                                                                                                                                                                                                                                                                                                                                                                                                                                                                                                                           |                   |                    |                   |                         |                 |                         |              |   |    |    |    |    |                       |   |        |        |         |   |           |   |    |    |    |    |           |   |    |    |    |    |           |   |    |    |    |    |                                                     |   |           |           |           |   |                            |   |           |           |           |   |                                                                                                                                 |   |    |    |   |   |                     |   |    |    |   |   |
| Outcomes                                                                                                                        | <b>Effectiveness</b><br>Ischemic stroke<br>Systemic embolism<br>Myocardial infarction<br><b>Safety</b><br>Intracranial hemorrhage<br>Gastrointestinal bleeding<br>All hospitalizations for bleeding<br>All-cause mortality                                                                                                                                                                                                                                                                                                                                                                                                                                                                                                                                                                                                                                                                                                                                                                                                                                                                                                                                                                         |                   |                    |                   |                         |                 |                         |              |   |    |    |    |    |                       |   |        |        |         |   |           |   |    |    |    |    |           |   |    |    |    |    |           |   |    |    |    |    |                                                     |   |           |           |           |   |                            |   |           |           |           |   |                                                                                                                                 |   |    |    |   |   |                     |   |    |    |   |   |
| Outcome definitions                                                                                                             | All outcomes were required to be discharge diagnoses, using the respective ICD codes                                                                                                                                                                                                                                                                                                                                                                                                                                                                                                                                                                                                                                                                                                                                                                                                                                                                                                                                                                                                                                                                                                               |                   |                    |                   |                         |                 |                         |              |   |    |    |    |    |                       |   |        |        |         |   |           |   |    |    |    |    |           |   |    |    |    |    |           |   |    |    |    |    |                                                     |   |           |           |           |   |                            |   |           |           |           |   |                                                                                                                                 |   |    |    |   |   |                     |   |    |    |   |   |
| Population (eligibility)                                                                                                        | Patients with NVAf treated with rivaroxaban, dabigatran, or warfarin<br>Exclusion criteria:<br>Pulmonary embolism or deep vein thrombosis within 6 months before Af diagnosis<br>Joint replacement or valvular surgery within 6 months before Af diagnosis<br>End-stage renal disease<br>< 30 years of age<br>Rivaroxaban or dabigatran users switched to warfarin                                                                                                                                                                                                                                                                                                                                                                                                                                                                                                                                                                                                                                                                                                                                                                                                                                 |                   |                    |                   |                         |                 |                         |              |   |    |    |    |    |                       |   |        |        |         |   |           |   |    |    |    |    |           |   |    |    |    |    |           |   |    |    |    |    |                                                     |   |           |           |           |   |                            |   |           |           |           |   |                                                                                                                                 |   |    |    |   |   |                     |   |    |    |   |   |
| Population (study sample)                                                                                                       | <b>Study population</b><br>N = 15 088<br>Warfarin, n = 5251 (34.8%)<br>Dabigatran 300 mg daily, n = 620 (0.4%)<br>Dabigatran 220 mg daily, n = 5301 (35.1%)<br>Rivaroxaban 20 mg daily, n = 491 (3.2%)<br>Rivaroxaban 15 mg daily, n = 3009 (19.9%)<br>Rivaroxaban 10 mg daily, n = 416 (2.7%)<br><b>Target population</b><br>80 365 dabigatran, rivaroxaban, or warfarin users; 65 227 met the above exclusion criteria and were excluded                                                                                                                                                                                                                                                                                                                                                                                                                                                                                                                                                                                                                                                                                                                                                         |                   |                    |                   |                         |                 |                         |              |   |    |    |    |    |                       |   |        |        |         |   |           |   |    |    |    |    |           |   |    |    |    |    |           |   |    |    |    |    |                                                     |   |           |           |           |   |                            |   |           |           |           |   |                                                                                                                                 |   |    |    |   |   |                     |   |    |    |   |   |
| <b>Population (baseline participant characteristics)</b> (values expressed as percentages unless otherwise stated)              |                                                                                                                                                                                                                                                                                                                                                                                                                                                                                                                                                                                                                                                                                                                                                                                                                                                                                                                                                                                                                                                                                                                                                                                                    |                   |                    |                   |                         |                 |                         |              |   |    |    |    |    |                       |   |        |        |         |   |           |   |    |    |    |    |           |   |    |    |    |    |           |   |    |    |    |    |                                                     |   |           |           |           |   |                            |   |           |           |           |   |                                                                                                                                 |   |    |    |   |   |                     |   |    |    |   |   |
|                                                                                                                                 | <table><tr><td></td><td><b>Apixaban</b></td><td><b>Dabigatran</b></td><td><b>Rivaroxaban</b></td><td><b>Warfarin</b></td><td><b>All participants</b></td></tr><tr><td><b>Women</b></td><td>-</td><td>42</td><td>46</td><td>44</td><td>44</td></tr><tr><td><b>Age, mean (SD)</b></td><td>-</td><td>75 (9)</td><td>76 (9)</td><td>71 (12)</td><td>-</td></tr><tr><td>&gt;65 years</td><td>-</td><td>87</td><td>89</td><td>69</td><td>81</td></tr><tr><td>&gt;75 years</td><td>-</td><td>58</td><td>60</td><td>43</td><td>53</td></tr><tr><td>&gt;85 years</td><td>-</td><td>16</td><td>17</td><td>13</td><td>15</td></tr><tr><td><b>CHA<sub>2</sub>DS<sub>2</sub>VASc, mean (SD)</b></td><td>-</td><td>4.1 (1.6)</td><td>4.1 (1.6)</td><td>3.3 (1.8)</td><td>-</td></tr><tr><td><b>HAS-BLED, mean (SD)</b></td><td>-</td><td>3.1 (1.1)</td><td>3.1 (1.1)</td><td>2.7 (1.3)</td><td>-</td></tr><tr><td><b>Standard dose</b> (for rivaroxaban, 20 or 15 mg daily, depending on serum Cr clearance; for dabigatran, 150 to 300 mg daily)</td><td>-</td><td>10</td><td>13</td><td>-</td><td>-</td></tr><tr><td><b>Reduced dose</b></td><td>-</td><td>90</td><td>87</td><td>-</td><td>-</td></tr></table> |                   | <b>Apixaban</b>    | <b>Dabigatran</b> | <b>Rivaroxaban</b>      | <b>Warfarin</b> | <b>All participants</b> | <b>Women</b> | - | 42 | 46 | 44 | 44 | <b>Age, mean (SD)</b> | - | 75 (9) | 76 (9) | 71 (12) | - | >65 years | - | 87 | 89 | 69 | 81 | >75 years | - | 58 | 60 | 43 | 53 | >85 years | - | 16 | 17 | 13 | 15 | <b>CHA<sub>2</sub>DS<sub>2</sub>VASc, mean (SD)</b> | - | 4.1 (1.6) | 4.1 (1.6) | 3.3 (1.8) | - | <b>HAS-BLED, mean (SD)</b> | - | 3.1 (1.1) | 3.1 (1.1) | 2.7 (1.3) | - | <b>Standard dose</b> (for rivaroxaban, 20 or 15 mg daily, depending on serum Cr clearance; for dabigatran, 150 to 300 mg daily) | - | 10 | 13 | - | - | <b>Reduced dose</b> | - | 90 | 87 | - | - |
|                                                                                                                                 | <b>Apixaban</b>                                                                                                                                                                                                                                                                                                                                                                                                                                                                                                                                                                                                                                                                                                                                                                                                                                                                                                                                                                                                                                                                                                                                                                                    | <b>Dabigatran</b> | <b>Rivaroxaban</b> | <b>Warfarin</b>   | <b>All participants</b> |                 |                         |              |   |    |    |    |    |                       |   |        |        |         |   |           |   |    |    |    |    |           |   |    |    |    |    |           |   |    |    |    |    |                                                     |   |           |           |           |   |                            |   |           |           |           |   |                                                                                                                                 |   |    |    |   |   |                     |   |    |    |   |   |
| <b>Women</b>                                                                                                                    | -                                                                                                                                                                                                                                                                                                                                                                                                                                                                                                                                                                                                                                                                                                                                                                                                                                                                                                                                                                                                                                                                                                                                                                                                  | 42                | 46                 | 44                | 44                      |                 |                         |              |   |    |    |    |    |                       |   |        |        |         |   |           |   |    |    |    |    |           |   |    |    |    |    |           |   |    |    |    |    |                                                     |   |           |           |           |   |                            |   |           |           |           |   |                                                                                                                                 |   |    |    |   |   |                     |   |    |    |   |   |
| <b>Age, mean (SD)</b>                                                                                                           | -                                                                                                                                                                                                                                                                                                                                                                                                                                                                                                                                                                                                                                                                                                                                                                                                                                                                                                                                                                                                                                                                                                                                                                                                  | 75 (9)            | 76 (9)             | 71 (12)           | -                       |                 |                         |              |   |    |    |    |    |                       |   |        |        |         |   |           |   |    |    |    |    |           |   |    |    |    |    |           |   |    |    |    |    |                                                     |   |           |           |           |   |                            |   |           |           |           |   |                                                                                                                                 |   |    |    |   |   |                     |   |    |    |   |   |
| >65 years                                                                                                                       | -                                                                                                                                                                                                                                                                                                                                                                                                                                                                                                                                                                                                                                                                                                                                                                                                                                                                                                                                                                                                                                                                                                                                                                                                  | 87                | 89                 | 69                | 81                      |                 |                         |              |   |    |    |    |    |                       |   |        |        |         |   |           |   |    |    |    |    |           |   |    |    |    |    |           |   |    |    |    |    |                                                     |   |           |           |           |   |                            |   |           |           |           |   |                                                                                                                                 |   |    |    |   |   |                     |   |    |    |   |   |
| >75 years                                                                                                                       | -                                                                                                                                                                                                                                                                                                                                                                                                                                                                                                                                                                                                                                                                                                                                                                                                                                                                                                                                                                                                                                                                                                                                                                                                  | 58                | 60                 | 43                | 53                      |                 |                         |              |   |    |    |    |    |                       |   |        |        |         |   |           |   |    |    |    |    |           |   |    |    |    |    |           |   |    |    |    |    |                                                     |   |           |           |           |   |                            |   |           |           |           |   |                                                                                                                                 |   |    |    |   |   |                     |   |    |    |   |   |
| >85 years                                                                                                                       | -                                                                                                                                                                                                                                                                                                                                                                                                                                                                                                                                                                                                                                                                                                                                                                                                                                                                                                                                                                                                                                                                                                                                                                                                  | 16                | 17                 | 13                | 15                      |                 |                         |              |   |    |    |    |    |                       |   |        |        |         |   |           |   |    |    |    |    |           |   |    |    |    |    |           |   |    |    |    |    |                                                     |   |           |           |           |   |                            |   |           |           |           |   |                                                                                                                                 |   |    |    |   |   |                     |   |    |    |   |   |
| <b>CHA<sub>2</sub>DS<sub>2</sub>VASc, mean (SD)</b>                                                                             | -                                                                                                                                                                                                                                                                                                                                                                                                                                                                                                                                                                                                                                                                                                                                                                                                                                                                                                                                                                                                                                                                                                                                                                                                  | 4.1 (1.6)         | 4.1 (1.6)          | 3.3 (1.8)         | -                       |                 |                         |              |   |    |    |    |    |                       |   |        |        |         |   |           |   |    |    |    |    |           |   |    |    |    |    |           |   |    |    |    |    |                                                     |   |           |           |           |   |                            |   |           |           |           |   |                                                                                                                                 |   |    |    |   |   |                     |   |    |    |   |   |
| <b>HAS-BLED, mean (SD)</b>                                                                                                      | -                                                                                                                                                                                                                                                                                                                                                                                                                                                                                                                                                                                                                                                                                                                                                                                                                                                                                                                                                                                                                                                                                                                                                                                                  | 3.1 (1.1)         | 3.1 (1.1)          | 2.7 (1.3)         | -                       |                 |                         |              |   |    |    |    |    |                       |   |        |        |         |   |           |   |    |    |    |    |           |   |    |    |    |    |           |   |    |    |    |    |                                                     |   |           |           |           |   |                            |   |           |           |           |   |                                                                                                                                 |   |    |    |   |   |                     |   |    |    |   |   |
| <b>Standard dose</b> (for rivaroxaban, 20 or 15 mg daily, depending on serum Cr clearance; for dabigatran, 150 to 300 mg daily) | -                                                                                                                                                                                                                                                                                                                                                                                                                                                                                                                                                                                                                                                                                                                                                                                                                                                                                                                                                                                                                                                                                                                                                                                                  | 10                | 13                 | -                 | -                       |                 |                         |              |   |    |    |    |    |                       |   |        |        |         |   |           |   |    |    |    |    |           |   |    |    |    |    |           |   |    |    |    |    |                                                     |   |           |           |           |   |                            |   |           |           |           |   |                                                                                                                                 |   |    |    |   |   |                     |   |    |    |   |   |
| <b>Reduced dose</b>                                                                                                             | -                                                                                                                                                                                                                                                                                                                                                                                                                                                                                                                                                                                                                                                                                                                                                                                                                                                                                                                                                                                                                                                                                                                                                                                                  | 90                | 87                 | -                 | -                       |                 |                         |              |   |    |    |    |    |                       |   |        |        |         |   |           |   |    |    |    |    |           |   |    |    |    |    |           |   |    |    |    |    |                                                     |   |           |           |           |   |                            |   |           |           |           |   |                                                                                                                                 |   |    |    |   |   |                     |   |    |    |   |   |

|                                                                                                                                                                                                                                 |   |    |    |    |    |
|---------------------------------------------------------------------------------------------------------------------------------------------------------------------------------------------------------------------------------|---|----|----|----|----|
| <b>Comorbidities</b>                                                                                                                                                                                                            |   |    |    |    |    |
| Ischemic stroke, or systemic embolism, or TIA                                                                                                                                                                                   | - | 37 | 34 | 22 | 31 |
| Heart failure                                                                                                                                                                                                                   | - | 16 | 16 | 16 | 16 |
| Myocardial infarction                                                                                                                                                                                                           | - | 3  | 4  | 3  | 3  |
| Vascular disease                                                                                                                                                                                                                | - | 0  | 0  | 0  | 0  |
| Renal dysfunction                                                                                                                                                                                                               | - | 22 | 22 | 21 | 22 |
| Previous bleeding                                                                                                                                                                                                               | - | 2  | 2  | 2  | 2  |
| Hypertension                                                                                                                                                                                                                    | - | 86 | 87 | 75 | 82 |
| Diabetes                                                                                                                                                                                                                        | - | 41 | 41 | 36 | 39 |
| Cancer                                                                                                                                                                                                                          | - | -  | -  | -  | -  |
| <b>Concomitant medication</b>                                                                                                                                                                                                   |   |    |    |    |    |
| Aspirin                                                                                                                                                                                                                         | - | 45 | 41 | 54 | 47 |
| Beta-blocker                                                                                                                                                                                                                    | - | -  | -  | -  | -  |
| NSAID                                                                                                                                                                                                                           | - | 25 | 23 | 26 | 25 |
| Calcium channel blocker                                                                                                                                                                                                         | - | -  | -  | -  | -  |
| Renin angiotensin system inhibitor                                                                                                                                                                                              | - | -  | -  | -  | -  |
| <b>Analysis</b>                                                                                                                                                                                                                 |   |    |    |    |    |
| <b>Measure of the risk of an end point</b>                                                                                                                                                                                      |   |    |    |    |    |
| Incidence rates, estimated using the total number of study outcomes during the follow-up period divided by person-years at risk                                                                                                 |   |    |    |    |    |
| <b>Comparison of the risk of an end point between groups</b>                                                                                                                                                                    |   |    |    |    |    |
| Kaplan-Meier method and log-rank test for univariate analysis and Cox proportional hazards regression for multivariate analysis                                                                                                 |   |    |    |    |    |
| <b>Confounding</b>                                                                                                                                                                                                              |   |    |    |    |    |
| The inverse probability of treatment weights of propensity scores was used to balance covariates across the 3 study groups regarding time-to-event analyses (incidence rate, log-rank test, and Cox proportional hazards model) |   |    |    |    |    |
| The balance of covariates at baseline among study groups was assessed using the absolute standardized mean difference                                                                                                           |   |    |    |    |    |
| <b>Sensitivity analysis</b>                                                                                                                                                                                                     |   |    |    |    |    |
| Not reported                                                                                                                                                                                                                    |   |    |    |    |    |
| <b>Supplementary analyses</b>                                                                                                                                                                                                   |   |    |    |    |    |
| Subgroup analysis to determine whether the NOACs had protective effects for 4 outcomes vs warfarin                                                                                                                              |   |    |    |    |    |
| Subgroup analysis on the basis of age, presence of chronic kidney disease, and CHA <sub>2</sub> DS <sub>2</sub> -VASc and HAS-BLED scores                                                                                       |   |    |    |    |    |
| <b>Software for statistical analysis</b>                                                                                                                                                                                        |   |    |    |    |    |
| SAS 9.4 (SAS Institute, Cary, North Carolina)                                                                                                                                                                                   |   |    |    |    |    |
| <b>Statistical significance reference</b>                                                                                                                                                                                       |   |    |    |    |    |
| $P < .05$ was considered statistically significant                                                                                                                                                                              |   |    |    |    |    |
| NOACs, nonvitamin K antagonist oral anticoagulants; NVAF, nonvalvular atrial fibrillation; SD, standard deviation; TIA, transient ischemic attack.                                                                              |   |    |    |    |    |

|                                                                                                                    |                                                                                                                                                                                                                                                                                                                                                                                                                                                                                                                                                                                                                                                                                                                                                                                                                                                                                                                                                                                                                                                              |            |             |            |                  |          |                  |       |   |    |   |    |    |                |   |         |   |         |   |           |   |    |   |    |    |           |   |    |   |    |    |           |   |    |   |    |    |                                                  |   |           |   |           |   |                     |   |           |   |           |   |               |   |     |   |   |   |              |   |   |   |   |   |               |  |  |  |  |  |
|--------------------------------------------------------------------------------------------------------------------|--------------------------------------------------------------------------------------------------------------------------------------------------------------------------------------------------------------------------------------------------------------------------------------------------------------------------------------------------------------------------------------------------------------------------------------------------------------------------------------------------------------------------------------------------------------------------------------------------------------------------------------------------------------------------------------------------------------------------------------------------------------------------------------------------------------------------------------------------------------------------------------------------------------------------------------------------------------------------------------------------------------------------------------------------------------|------------|-------------|------------|------------------|----------|------------------|-------|---|----|---|----|----|----------------|---|---------|---|---------|---|-----------|---|----|---|----|----|-----------|---|----|---|----|----|-----------|---|----|---|----|----|--------------------------------------------------|---|-----------|---|-----------|---|---------------------|---|-----------|---|-----------|---|---------------|---|-----|---|---|---|--------------|---|---|---|---|---|---------------|--|--|--|--|--|
| Study ID                                                                                                           | Chan et al. <sup>63</sup>                                                                                                                                                                                                                                                                                                                                                                                                                                                                                                                                                                                                                                                                                                                                                                                                                                                                                                                                                                                                                                    |            |             |            |                  |          |                  |       |   |    |   |    |    |                |   |         |   |         |   |           |   |    |   |    |    |           |   |    |   |    |    |           |   |    |   |    |    |                                                  |   |           |   |           |   |                     |   |           |   |           |   |               |   |     |   |   |   |              |   |   |   |   |   |               |  |  |  |  |  |
| Reference                                                                                                          | Chan YH, Yen KC, See LC, Chang SH, Wu LS, Lee HF, et al. Cardiovascular, bleeding, and mortality risks of dabigatran in Asians with nonvalvular atrial fibrillation. <i>Stroke</i> . 2016;47:441-449. doi:10.1161/STROKEAHA                                                                                                                                                                                                                                                                                                                                                                                                                                                                                                                                                                                                                                                                                                                                                                                                                                  |            |             |            |                  |          |                  |       |   |    |   |    |    |                |   |         |   |         |   |           |   |    |   |    |    |           |   |    |   |    |    |           |   |    |   |    |    |                                                  |   |           |   |           |   |                     |   |           |   |           |   |               |   |     |   |   |   |              |   |   |   |   |   |               |  |  |  |  |  |
| Objective                                                                                                          | To investigate the ischemic and bleeding outcomes associated with dabigatran in Asian patients with nonvalvular atrial fibrillation (AF) vs warfarin                                                                                                                                                                                                                                                                                                                                                                                                                                                                                                                                                                                                                                                                                                                                                                                                                                                                                                         |            |             |            |                  |          |                  |       |   |    |   |    |    |                |   |         |   |         |   |           |   |    |   |    |    |           |   |    |   |    |    |           |   |    |   |    |    |                                                  |   |           |   |           |   |                     |   |           |   |           |   |               |   |     |   |   |   |              |   |   |   |   |   |               |  |  |  |  |  |
| Country                                                                                                            | Taiwan                                                                                                                                                                                                                                                                                                                                                                                                                                                                                                                                                                                                                                                                                                                                                                                                                                                                                                                                                                                                                                                       |            |             |            |                  |          |                  |       |   |    |   |    |    |                |   |         |   |         |   |           |   |    |   |    |    |           |   |    |   |    |    |           |   |    |   |    |    |                                                  |   |           |   |           |   |                     |   |           |   |           |   |               |   |     |   |   |   |              |   |   |   |   |   |               |  |  |  |  |  |
| Design                                                                                                             | Nationwide cohort study                                                                                                                                                                                                                                                                                                                                                                                                                                                                                                                                                                                                                                                                                                                                                                                                                                                                                                                                                                                                                                      |            |             |            |                  |          |                  |       |   |    |   |    |    |                |   |         |   |         |   |           |   |    |   |    |    |           |   |    |   |    |    |           |   |    |   |    |    |                                                  |   |           |   |           |   |                     |   |           |   |           |   |               |   |     |   |   |   |              |   |   |   |   |   |               |  |  |  |  |  |
| Data source                                                                                                        | The Taiwan National Health Insurance Research, which is a national billing administrative database of health care services with >23 million enrollees, covering >99% of the population of Taiwan in 2014                                                                                                                                                                                                                                                                                                                                                                                                                                                                                                                                                                                                                                                                                                                                                                                                                                                     |            |             |            |                  |          |                  |       |   |    |   |    |    |                |   |         |   |         |   |           |   |    |   |    |    |           |   |    |   |    |    |           |   |    |   |    |    |                                                  |   |           |   |           |   |                     |   |           |   |           |   |               |   |     |   |   |   |              |   |   |   |   |   |               |  |  |  |  |  |
| Time period                                                                                                        | June 2012 to December 2013                                                                                                                                                                                                                                                                                                                                                                                                                                                                                                                                                                                                                                                                                                                                                                                                                                                                                                                                                                                                                                   |            |             |            |                  |          |                  |       |   |    |   |    |    |                |   |         |   |         |   |           |   |    |   |    |    |           |   |    |   |    |    |           |   |    |   |    |    |                                                  |   |           |   |           |   |                     |   |           |   |           |   |               |   |     |   |   |   |              |   |   |   |   |   |               |  |  |  |  |  |
| NOAC                                                                                                               | Dabigatran                                                                                                                                                                                                                                                                                                                                                                                                                                                                                                                                                                                                                                                                                                                                                                                                                                                                                                                                                                                                                                                   |            |             |            |                  |          |                  |       |   |    |   |    |    |                |   |         |   |         |   |           |   |    |   |    |    |           |   |    |   |    |    |           |   |    |   |    |    |                                                  |   |           |   |           |   |                     |   |           |   |           |   |               |   |     |   |   |   |              |   |   |   |   |   |               |  |  |  |  |  |
| Control                                                                                                            | Warfarin                                                                                                                                                                                                                                                                                                                                                                                                                                                                                                                                                                                                                                                                                                                                                                                                                                                                                                                                                                                                                                                     |            |             |            |                  |          |                  |       |   |    |   |    |    |                |   |         |   |         |   |           |   |    |   |    |    |           |   |    |   |    |    |           |   |    |   |    |    |                                                  |   |           |   |           |   |                     |   |           |   |           |   |               |   |     |   |   |   |              |   |   |   |   |   |               |  |  |  |  |  |
| Outcomes                                                                                                           | <b>Effectiveness</b><br>Ischemic stroke<br>Myocardial infarction<br><b>Safety</b><br>Intracranial hemorrhage<br>Major gastrointestinal bleeding<br>All major bleeding events<br>All-cause mortality                                                                                                                                                                                                                                                                                                                                                                                                                                                                                                                                                                                                                                                                                                                                                                                                                                                          |            |             |            |                  |          |                  |       |   |    |   |    |    |                |   |         |   |         |   |           |   |    |   |    |    |           |   |    |   |    |    |           |   |    |   |    |    |                                                  |   |           |   |           |   |                     |   |           |   |           |   |               |   |     |   |   |   |              |   |   |   |   |   |               |  |  |  |  |  |
| Outcome definitions                                                                                                | All outcomes had to be a discharge diagnosis<br>Major gastrointestinal bleeding was defined as a hospitalized gastrointestinal bleeding event requiring transfusion<br>Major hospitalized bleeding events were defined as the total events of intracranial hemorrhage plus major gastrointestinal bleeding                                                                                                                                                                                                                                                                                                                                                                                                                                                                                                                                                                                                                                                                                                                                                   |            |             |            |                  |          |                  |       |   |    |   |    |    |                |   |         |   |         |   |           |   |    |   |    |    |           |   |    |   |    |    |           |   |    |   |    |    |                                                  |   |           |   |           |   |                     |   |           |   |           |   |               |   |     |   |   |   |              |   |   |   |   |   |               |  |  |  |  |  |
| Population (eligibility)                                                                                           | Patients with NVAf treated with dabigatran or warfarin<br>Exclusion criteria:<br>Pulmonary embolism or deep vein thrombosis within 6 months before AF was diagnosed<br>Joint replacement or valvular surgery within 6 months before AF was diagnosed<br>End-stage renal disease<br>< 30 years of age<br>Dabigatran users switched to warfarin<br>Use of warfarin before June 2012                                                                                                                                                                                                                                                                                                                                                                                                                                                                                                                                                                                                                                                                            |            |             |            |                  |          |                  |       |   |    |   |    |    |                |   |         |   |         |   |           |   |    |   |    |    |           |   |    |   |    |    |           |   |    |   |    |    |                                                  |   |           |   |           |   |                     |   |           |   |           |   |               |   |     |   |   |   |              |   |   |   |   |   |               |  |  |  |  |  |
| Population (study sample)                                                                                          | <b>Study population</b><br>N = 19 853<br>Warfarin, n = 9913 (50%)<br>Dabigatran, n = 9940 (50%)<br>300 mg daily, n = 1168 (12%)<br>220 mg daily, n = 8772 (88%)<br><b>Target population</b><br>89 705 patients diagnosed with AF and prescribed dabigatran or warfarin, of whom 69 852 met the above exclusion criteria and were excluded                                                                                                                                                                                                                                                                                                                                                                                                                                                                                                                                                                                                                                                                                                                    |            |             |            |                  |          |                  |       |   |    |   |    |    |                |   |         |   |         |   |           |   |    |   |    |    |           |   |    |   |    |    |           |   |    |   |    |    |                                                  |   |           |   |           |   |                     |   |           |   |           |   |               |   |     |   |   |   |              |   |   |   |   |   |               |  |  |  |  |  |
| <b>Population (baseline participant characteristics) (values expressed as percentages unless otherwise stated)</b> |                                                                                                                                                                                                                                                                                                                                                                                                                                                                                                                                                                                                                                                                                                                                                                                                                                                                                                                                                                                                                                                              |            |             |            |                  |          |                  |       |   |    |   |    |    |                |   |         |   |         |   |           |   |    |   |    |    |           |   |    |   |    |    |           |   |    |   |    |    |                                                  |   |           |   |           |   |                     |   |           |   |           |   |               |   |     |   |   |   |              |   |   |   |   |   |               |  |  |  |  |  |
|                                                                                                                    | <table><tr><td></td><td>Apixaban</td><td>Dabigatran</td><td>Rivaroxaban</td><td>Warfarin</td><td>All participants</td></tr><tr><td>Women</td><td>-</td><td>42</td><td>-</td><td>44</td><td>43</td></tr><tr><td>Age, mean (SD)</td><td>-</td><td>75 (10)</td><td>-</td><td>71 (12)</td><td>-</td></tr><tr><td>&gt;65 years</td><td>-</td><td>87</td><td>-</td><td>71</td><td>79</td></tr><tr><td>&gt;75 years</td><td>-</td><td>58</td><td>-</td><td>44</td><td>51</td></tr><tr><td>&gt;85 years</td><td>-</td><td>15</td><td>-</td><td>13</td><td>14</td></tr><tr><td>CHA<sub>2</sub>DS<sub>2</sub>VASc, mean (SD)</td><td>-</td><td>3.1 (1.6)</td><td>-</td><td>3.4 (1.8)</td><td>-</td></tr><tr><td>HAS-BLED, mean (SD)</td><td>-</td><td>2.6 (1.0)</td><td>-</td><td>2.1 (1.2)</td><td>-</td></tr><tr><td>Standard dose</td><td>-</td><td>100</td><td>-</td><td>-</td><td>-</td></tr><tr><td>Reduced dose</td><td>-</td><td>0</td><td>-</td><td>-</td><td>-</td></tr><tr><td>Comorbidities</td><td></td><td></td><td></td><td></td><td></td></tr></table> |            | Apixaban    | Dabigatran | Rivaroxaban      | Warfarin | All participants | Women | - | 42 | - | 44 | 43 | Age, mean (SD) | - | 75 (10) | - | 71 (12) | - | >65 years | - | 87 | - | 71 | 79 | >75 years | - | 58 | - | 44 | 51 | >85 years | - | 15 | - | 13 | 14 | CHA <sub>2</sub> DS <sub>2</sub> VASc, mean (SD) | - | 3.1 (1.6) | - | 3.4 (1.8) | - | HAS-BLED, mean (SD) | - | 2.6 (1.0) | - | 2.1 (1.2) | - | Standard dose | - | 100 | - | - | - | Reduced dose | - | 0 | - | - | - | Comorbidities |  |  |  |  |  |
|                                                                                                                    | Apixaban                                                                                                                                                                                                                                                                                                                                                                                                                                                                                                                                                                                                                                                                                                                                                                                                                                                                                                                                                                                                                                                     | Dabigatran | Rivaroxaban | Warfarin   | All participants |          |                  |       |   |    |   |    |    |                |   |         |   |         |   |           |   |    |   |    |    |           |   |    |   |    |    |           |   |    |   |    |    |                                                  |   |           |   |           |   |                     |   |           |   |           |   |               |   |     |   |   |   |              |   |   |   |   |   |               |  |  |  |  |  |
| Women                                                                                                              | -                                                                                                                                                                                                                                                                                                                                                                                                                                                                                                                                                                                                                                                                                                                                                                                                                                                                                                                                                                                                                                                            | 42         | -           | 44         | 43               |          |                  |       |   |    |   |    |    |                |   |         |   |         |   |           |   |    |   |    |    |           |   |    |   |    |    |           |   |    |   |    |    |                                                  |   |           |   |           |   |                     |   |           |   |           |   |               |   |     |   |   |   |              |   |   |   |   |   |               |  |  |  |  |  |
| Age, mean (SD)                                                                                                     | -                                                                                                                                                                                                                                                                                                                                                                                                                                                                                                                                                                                                                                                                                                                                                                                                                                                                                                                                                                                                                                                            | 75 (10)    | -           | 71 (12)    | -                |          |                  |       |   |    |   |    |    |                |   |         |   |         |   |           |   |    |   |    |    |           |   |    |   |    |    |           |   |    |   |    |    |                                                  |   |           |   |           |   |                     |   |           |   |           |   |               |   |     |   |   |   |              |   |   |   |   |   |               |  |  |  |  |  |
| >65 years                                                                                                          | -                                                                                                                                                                                                                                                                                                                                                                                                                                                                                                                                                                                                                                                                                                                                                                                                                                                                                                                                                                                                                                                            | 87         | -           | 71         | 79               |          |                  |       |   |    |   |    |    |                |   |         |   |         |   |           |   |    |   |    |    |           |   |    |   |    |    |           |   |    |   |    |    |                                                  |   |           |   |           |   |                     |   |           |   |           |   |               |   |     |   |   |   |              |   |   |   |   |   |               |  |  |  |  |  |
| >75 years                                                                                                          | -                                                                                                                                                                                                                                                                                                                                                                                                                                                                                                                                                                                                                                                                                                                                                                                                                                                                                                                                                                                                                                                            | 58         | -           | 44         | 51               |          |                  |       |   |    |   |    |    |                |   |         |   |         |   |           |   |    |   |    |    |           |   |    |   |    |    |           |   |    |   |    |    |                                                  |   |           |   |           |   |                     |   |           |   |           |   |               |   |     |   |   |   |              |   |   |   |   |   |               |  |  |  |  |  |
| >85 years                                                                                                          | -                                                                                                                                                                                                                                                                                                                                                                                                                                                                                                                                                                                                                                                                                                                                                                                                                                                                                                                                                                                                                                                            | 15         | -           | 13         | 14               |          |                  |       |   |    |   |    |    |                |   |         |   |         |   |           |   |    |   |    |    |           |   |    |   |    |    |           |   |    |   |    |    |                                                  |   |           |   |           |   |                     |   |           |   |           |   |               |   |     |   |   |   |              |   |   |   |   |   |               |  |  |  |  |  |
| CHA <sub>2</sub> DS <sub>2</sub> VASc, mean (SD)                                                                   | -                                                                                                                                                                                                                                                                                                                                                                                                                                                                                                                                                                                                                                                                                                                                                                                                                                                                                                                                                                                                                                                            | 3.1 (1.6)  | -           | 3.4 (1.8)  | -                |          |                  |       |   |    |   |    |    |                |   |         |   |         |   |           |   |    |   |    |    |           |   |    |   |    |    |           |   |    |   |    |    |                                                  |   |           |   |           |   |                     |   |           |   |           |   |               |   |     |   |   |   |              |   |   |   |   |   |               |  |  |  |  |  |
| HAS-BLED, mean (SD)                                                                                                | -                                                                                                                                                                                                                                                                                                                                                                                                                                                                                                                                                                                                                                                                                                                                                                                                                                                                                                                                                                                                                                                            | 2.6 (1.0)  | -           | 2.1 (1.2)  | -                |          |                  |       |   |    |   |    |    |                |   |         |   |         |   |           |   |    |   |    |    |           |   |    |   |    |    |           |   |    |   |    |    |                                                  |   |           |   |           |   |                     |   |           |   |           |   |               |   |     |   |   |   |              |   |   |   |   |   |               |  |  |  |  |  |
| Standard dose                                                                                                      | -                                                                                                                                                                                                                                                                                                                                                                                                                                                                                                                                                                                                                                                                                                                                                                                                                                                                                                                                                                                                                                                            | 100        | -           | -          | -                |          |                  |       |   |    |   |    |    |                |   |         |   |         |   |           |   |    |   |    |    |           |   |    |   |    |    |           |   |    |   |    |    |                                                  |   |           |   |           |   |                     |   |           |   |           |   |               |   |     |   |   |   |              |   |   |   |   |   |               |  |  |  |  |  |
| Reduced dose                                                                                                       | -                                                                                                                                                                                                                                                                                                                                                                                                                                                                                                                                                                                                                                                                                                                                                                                                                                                                                                                                                                                                                                                            | 0          | -           | -          | -                |          |                  |       |   |    |   |    |    |                |   |         |   |         |   |           |   |    |   |    |    |           |   |    |   |    |    |           |   |    |   |    |    |                                                  |   |           |   |           |   |                     |   |           |   |           |   |               |   |     |   |   |   |              |   |   |   |   |   |               |  |  |  |  |  |
| Comorbidities                                                                                                      |                                                                                                                                                                                                                                                                                                                                                                                                                                                                                                                                                                                                                                                                                                                                                                                                                                                                                                                                                                                                                                                              |            |             |            |                  |          |                  |       |   |    |   |    |    |                |   |         |   |         |   |           |   |    |   |    |    |           |   |    |   |    |    |           |   |    |   |    |    |                                                  |   |           |   |           |   |                     |   |           |   |           |   |               |   |     |   |   |   |              |   |   |   |   |   |               |  |  |  |  |  |

|                                                                                                                                                                                                  |                                                                                                                                                                                                                                                    |    |   |    |    |
|--------------------------------------------------------------------------------------------------------------------------------------------------------------------------------------------------|----------------------------------------------------------------------------------------------------------------------------------------------------------------------------------------------------------------------------------------------------|----|---|----|----|
| Ischemic stroke, or systemic embolism, or TIA                                                                                                                                                    | -                                                                                                                                                                                                                                                  | 39 | - | 24 | 32 |
| Heart failure                                                                                                                                                                                    | -                                                                                                                                                                                                                                                  | 16 | - | 15 | 16 |
| Myocardial infarction                                                                                                                                                                            | -                                                                                                                                                                                                                                                  | 3  | - | 3  | 3  |
| Vascular disease                                                                                                                                                                                 | -                                                                                                                                                                                                                                                  | -  | - | -  | -  |
| Renal dysfunction                                                                                                                                                                                | -                                                                                                                                                                                                                                                  | 23 | - | 21 | 22 |
| Previous bleeding                                                                                                                                                                                | -                                                                                                                                                                                                                                                  | 1  | - | 1  | 1  |
| Hypertension                                                                                                                                                                                     | -                                                                                                                                                                                                                                                  | 87 | - | 77 | 82 |
| Diabetes                                                                                                                                                                                         | -                                                                                                                                                                                                                                                  | 41 | - | 35 | 38 |
| Cancer                                                                                                                                                                                           | -                                                                                                                                                                                                                                                  | -  | - | -  | -  |
| <b>Concomitant medication</b>                                                                                                                                                                    |                                                                                                                                                                                                                                                    |    |   |    |    |
| Aspirin                                                                                                                                                                                          | -                                                                                                                                                                                                                                                  | 44 | - | 55 | 50 |
| Beta-blocker                                                                                                                                                                                     | -                                                                                                                                                                                                                                                  | -  | - | -  | -  |
| NSAID                                                                                                                                                                                            | -                                                                                                                                                                                                                                                  | 25 | - | 27 | 26 |
| Calcium channel blocker                                                                                                                                                                          | -                                                                                                                                                                                                                                                  | -  | - | -  | -  |
| Renin angiotensin system inhibitor                                                                                                                                                               | -                                                                                                                                                                                                                                                  | -  | - | -  | -  |
| <b>Analysis</b>                                                                                                                                                                                  | <b>Measure of the risk of an end point</b>                                                                                                                                                                                                         |    |   |    |    |
|                                                                                                                                                                                                  | Incidence rates were estimated using the total number of study outcomes during the follow-up period divided by person-years at risk                                                                                                                |    |   |    |    |
|                                                                                                                                                                                                  | <b>Comparison of the risk of an end point between groups</b>                                                                                                                                                                                       |    |   |    |    |
|                                                                                                                                                                                                  | The risk of study outcomes over time for dabigatran vs warfarin (reference) was obtained using survival analysis (Kaplan-Meier method and log-rank test for univariate analysis and Cox proportional hazards regression for multivariate analysis) |    |   |    |    |
|                                                                                                                                                                                                  | <b>Confounding</b>                                                                                                                                                                                                                                 |    |   |    |    |
|                                                                                                                                                                                                  | The inverse probability of treatment weights of propensity scores was used to balance covariates across the 2 study groups                                                                                                                         |    |   |    |    |
|                                                                                                                                                                                                  | The balance of potential confounders at baseline (index date) between the 2 study groups was assessed using the absolute standardized mean difference                                                                                              |    |   |    |    |
|                                                                                                                                                                                                  | <b>Sensitivity analysis</b>                                                                                                                                                                                                                        |    |   |    |    |
|                                                                                                                                                                                                  | Not reported                                                                                                                                                                                                                                       |    |   |    |    |
|                                                                                                                                                                                                  | <b>Supplementary analyses</b>                                                                                                                                                                                                                      |    |   |    |    |
| Analysis stratified by age                                                                                                                                                                       |                                                                                                                                                                                                                                                    |    |   |    |    |
| Subgroup analysis by dabigatran dose (ie, 300 mg and 220 mg daily)                                                                                                                               |                                                                                                                                                                                                                                                    |    |   |    |    |
| <b>Software for statistical analysis</b>                                                                                                                                                         |                                                                                                                                                                                                                                                    |    |   |    |    |
| SAS 9.2 (SAS Institute Inc, Cary, North Carolina)                                                                                                                                                |                                                                                                                                                                                                                                                    |    |   |    |    |
| <b>Statistical significance reference</b>                                                                                                                                                        |                                                                                                                                                                                                                                                    |    |   |    |    |
| <i>P</i> < .05                                                                                                                                                                                   |                                                                                                                                                                                                                                                    |    |   |    |    |
| NOACs, nonvitamin K antagonist oral anticoagulants; NSAIDs, nonsteroidal anti-inflammatory drugs; NVAf, nonvalvular atrial fibrillation; SD, standard deviation; TIA, transient ischemic attack. |                                                                                                                                                                                                                                                    |    |   |    |    |

| Study ID                                                                                                           | Chang et al. <sup>62</sup>                                                                                                                                                                                                                                                                                                                                                                                                                                                                                                                                                                                                                                                                                                                                                                                                                                                                                                                                                                                                                                                                                                                                                                                                                                                                                        |                           |                          |                                     |                          |                                     |              |      |      |      |      |                       |             |            |             |             |            |      |      |      |      |           |   |   |   |   |           |   |   |   |   |                                                     |  |  |  |  |                            |  |  |  |  |                      |     |  |  |  |                     |   |  |  |  |                      |  |  |  |  |                                               |   |   |   |   |               |   |   |   |   |                       |   |   |   |   |
|--------------------------------------------------------------------------------------------------------------------|-------------------------------------------------------------------------------------------------------------------------------------------------------------------------------------------------------------------------------------------------------------------------------------------------------------------------------------------------------------------------------------------------------------------------------------------------------------------------------------------------------------------------------------------------------------------------------------------------------------------------------------------------------------------------------------------------------------------------------------------------------------------------------------------------------------------------------------------------------------------------------------------------------------------------------------------------------------------------------------------------------------------------------------------------------------------------------------------------------------------------------------------------------------------------------------------------------------------------------------------------------------------------------------------------------------------|---------------------------|--------------------------|-------------------------------------|--------------------------|-------------------------------------|--------------|------|------|------|------|-----------------------|-------------|------------|-------------|-------------|------------|------|------|------|------|-----------|---|---|---|---|-----------|---|---|---|---|-----------------------------------------------------|--|--|--|--|----------------------------|--|--|--|--|----------------------|-----|--|--|--|---------------------|---|--|--|--|----------------------|--|--|--|--|-----------------------------------------------|---|---|---|---|---------------|---|---|---|---|-----------------------|---|---|---|---|
| Reference                                                                                                          | Chang HY, Zhou M, Tang W, Alexander GC, Singh S. Risk of gastrointestinal bleeding associated with oral anticoagulants: population based retrospective cohort study. <i>BMJ</i> . 2015;350:h1585. doi:10.1136/bmj.h1585                                                                                                                                                                                                                                                                                                                                                                                                                                                                                                                                                                                                                                                                                                                                                                                                                                                                                                                                                                                                                                                                                           |                           |                          |                                     |                          |                                     |              |      |      |      |      |                       |             |            |             |             |            |      |      |      |      |           |   |   |   |   |           |   |   |   |   |                                                     |  |  |  |  |                            |  |  |  |  |                      |     |  |  |  |                     |   |  |  |  |                      |  |  |  |  |                                               |   |   |   |   |               |   |   |   |   |                       |   |   |   |   |
| Objective                                                                                                          | To determine the real-world safety of dabigatran or rivaroxaban vs warfarin in terms of gastrointestinal bleeding                                                                                                                                                                                                                                                                                                                                                                                                                                                                                                                                                                                                                                                                                                                                                                                                                                                                                                                                                                                                                                                                                                                                                                                                 |                           |                          |                                     |                          |                                     |              |      |      |      |      |                       |             |            |             |             |            |      |      |      |      |           |   |   |   |   |           |   |   |   |   |                                                     |  |  |  |  |                            |  |  |  |  |                      |     |  |  |  |                     |   |  |  |  |                      |  |  |  |  |                                               |   |   |   |   |               |   |   |   |   |                       |   |   |   |   |
| Country                                                                                                            | United States                                                                                                                                                                                                                                                                                                                                                                                                                                                                                                                                                                                                                                                                                                                                                                                                                                                                                                                                                                                                                                                                                                                                                                                                                                                                                                     |                           |                          |                                     |                          |                                     |              |      |      |      |      |                       |             |            |             |             |            |      |      |      |      |           |   |   |   |   |           |   |   |   |   |                                                     |  |  |  |  |                            |  |  |  |  |                      |     |  |  |  |                     |   |  |  |  |                      |  |  |  |  |                                               |   |   |   |   |               |   |   |   |   |                       |   |   |   |   |
| Design                                                                                                             | Retrospective cohort study                                                                                                                                                                                                                                                                                                                                                                                                                                                                                                                                                                                                                                                                                                                                                                                                                                                                                                                                                                                                                                                                                                                                                                                                                                                                                        |                           |                          |                                     |                          |                                     |              |      |      |      |      |                       |             |            |             |             |            |      |      |      |      |           |   |   |   |   |           |   |   |   |   |                                                     |  |  |  |  |                            |  |  |  |  |                      |     |  |  |  |                     |   |  |  |  |                      |  |  |  |  |                                               |   |   |   |   |               |   |   |   |   |                       |   |   |   |   |
| Data source                                                                                                        | IMS Health LifeLink Health Plan Claims Database. This database contains commercial health plan information from managed care plans and other sources (such as Medicare and Medicaid) throughout the United States                                                                                                                                                                                                                                                                                                                                                                                                                                                                                                                                                                                                                                                                                                                                                                                                                                                                                                                                                                                                                                                                                                 |                           |                          |                                     |                          |                                     |              |      |      |      |      |                       |             |            |             |             |            |      |      |      |      |           |   |   |   |   |           |   |   |   |   |                                                     |  |  |  |  |                            |  |  |  |  |                      |     |  |  |  |                     |   |  |  |  |                      |  |  |  |  |                                               |   |   |   |   |               |   |   |   |   |                       |   |   |   |   |
| Time period                                                                                                        | October 1, 2010 and March 31, 2012                                                                                                                                                                                                                                                                                                                                                                                                                                                                                                                                                                                                                                                                                                                                                                                                                                                                                                                                                                                                                                                                                                                                                                                                                                                                                |                           |                          |                                     |                          |                                     |              |      |      |      |      |                       |             |            |             |             |            |      |      |      |      |           |   |   |   |   |           |   |   |   |   |                                                     |  |  |  |  |                            |  |  |  |  |                      |     |  |  |  |                     |   |  |  |  |                      |  |  |  |  |                                               |   |   |   |   |               |   |   |   |   |                       |   |   |   |   |
| NOAC                                                                                                               | Dabigatran 150 mg twice daily<br>Rivaroxaban                                                                                                                                                                                                                                                                                                                                                                                                                                                                                                                                                                                                                                                                                                                                                                                                                                                                                                                                                                                                                                                                                                                                                                                                                                                                      |                           |                          |                                     |                          |                                     |              |      |      |      |      |                       |             |            |             |             |            |      |      |      |      |           |   |   |   |   |           |   |   |   |   |                                                     |  |  |  |  |                            |  |  |  |  |                      |     |  |  |  |                     |   |  |  |  |                      |  |  |  |  |                                               |   |   |   |   |               |   |   |   |   |                       |   |   |   |   |
| Control                                                                                                            | Warfarin                                                                                                                                                                                                                                                                                                                                                                                                                                                                                                                                                                                                                                                                                                                                                                                                                                                                                                                                                                                                                                                                                                                                                                                                                                                                                                          |                           |                          |                                     |                          |                                     |              |      |      |      |      |                       |             |            |             |             |            |      |      |      |      |           |   |   |   |   |           |   |   |   |   |                                                     |  |  |  |  |                            |  |  |  |  |                      |     |  |  |  |                     |   |  |  |  |                      |  |  |  |  |                                               |   |   |   |   |               |   |   |   |   |                       |   |   |   |   |
| Outcomes                                                                                                           | <b>Safety</b><br>Time to gastrointestinal bleeding                                                                                                                                                                                                                                                                                                                                                                                                                                                                                                                                                                                                                                                                                                                                                                                                                                                                                                                                                                                                                                                                                                                                                                                                                                                                |                           |                          |                                     |                          |                                     |              |      |      |      |      |                       |             |            |             |             |            |      |      |      |      |           |   |   |   |   |           |   |   |   |   |                                                     |  |  |  |  |                            |  |  |  |  |                      |     |  |  |  |                     |   |  |  |  |                      |  |  |  |  |                                               |   |   |   |   |               |   |   |   |   |                       |   |   |   |   |
| Outcome definitions                                                                                                | Outcome defined according to ICD-9 codes and CPT codes validated in a recent study                                                                                                                                                                                                                                                                                                                                                                                                                                                                                                                                                                                                                                                                                                                                                                                                                                                                                                                                                                                                                                                                                                                                                                                                                                |                           |                          |                                     |                          |                                     |              |      |      |      |      |                       |             |            |             |             |            |      |      |      |      |           |   |   |   |   |           |   |   |   |   |                                                     |  |  |  |  |                            |  |  |  |  |                      |     |  |  |  |                     |   |  |  |  |                      |  |  |  |  |                                               |   |   |   |   |               |   |   |   |   |                       |   |   |   |   |
| Population (eligibility)                                                                                           | Enrollees with a prescription of warfarin, dabigatran, or rivaroxaban between October 1, 2010 and March 31, 2012, who were aged 18 years or older, had continuous enrollment and no oral anticoagulant use during the 6 months before the entry date, with known age and sex, and with no gastrointestinal bleeding for at least 6 months before the cohort entry date                                                                                                                                                                                                                                                                                                                                                                                                                                                                                                                                                                                                                                                                                                                                                                                                                                                                                                                                            |                           |                          |                                     |                          |                                     |              |      |      |      |      |                       |             |            |             |             |            |      |      |      |      |           |   |   |   |   |           |   |   |   |   |                                                     |  |  |  |  |                            |  |  |  |  |                      |     |  |  |  |                     |   |  |  |  |                      |  |  |  |  |                                               |   |   |   |   |               |   |   |   |   |                       |   |   |   |   |
| Population (study sample)                                                                                          | <b>Study population</b><br>N = 46 163<br>Dabigatran, n = 4907<br>Rivaroxaban, n = 1649<br>Warfarin, n = 3906<br><b>Target population</b><br>N = 244 872<br>Excluded: <ul style="list-style-type: none"><li>• Age &lt; 18 years, n = 1057</li><li>• Without continuous medical enrollment over 6 months before the cohort entry date, n = 74 289</li><li>• Without continuous drug enrollment over 6 months before the cohort entry date, n = 87 722</li><li>• Not new user, n = 119 026</li><li>• First prescription of oral anticoagulant after March 31, 2012, n = 7880</li><li>• Missing sex information, n = 395</li><li>• Had previous bleeding, n = 12 979 (10 693 in prebaseline period and 3533 in baseline period)</li></ul>                                                                                                                                                                                                                                                                                                                                                                                                                                                                                                                                                                             |                           |                          |                                     |                          |                                     |              |      |      |      |      |                       |             |            |             |             |            |      |      |      |      |           |   |   |   |   |           |   |   |   |   |                                                     |  |  |  |  |                            |  |  |  |  |                      |     |  |  |  |                     |   |  |  |  |                      |  |  |  |  |                                               |   |   |   |   |               |   |   |   |   |                       |   |   |   |   |
| <b>Population (baseline participant characteristics)</b> (values expressed as percentages unless otherwise stated) |                                                                                                                                                                                                                                                                                                                                                                                                                                                                                                                                                                                                                                                                                                                                                                                                                                                                                                                                                                                                                                                                                                                                                                                                                                                                                                                   |                           |                          |                                     |                          |                                     |              |      |      |      |      |                       |             |            |             |             |            |      |      |      |      |           |   |   |   |   |           |   |   |   |   |                                                     |  |  |  |  |                            |  |  |  |  |                      |     |  |  |  |                     |   |  |  |  |                      |  |  |  |  |                                               |   |   |   |   |               |   |   |   |   |                       |   |   |   |   |
|                                                                                                                    | <table><tr><th></th><th>Dabigatran<br/>(n = 4907)</th><th>Rivaroxaban<br/>(n = 1649)</th><th>Warfarin<br/>(n = 39 607)</th><th>All<br/>participants<br/>(n = 46 163)</th></tr><tr><td><b>Women</b></td><td>30.9</td><td>51.5</td><td>46.9</td><td>45.3</td></tr><tr><td><b>Age, mean (SD)</b></td><td>62.0 (12.0)</td><td>57.6 (9.8)</td><td>57.4 (13.5)</td><td>57.6 (13.3)</td></tr><tr><td>≥ 65 years</td><td>32.8</td><td>17.5</td><td>22.4</td><td>23.3</td></tr><tr><td>&gt;75 years</td><td>-</td><td>-</td><td>-</td><td>-</td></tr><tr><td>&gt;85 years</td><td>-</td><td>-</td><td>-</td><td>-</td></tr><tr><td><b>CHA<sub>2</sub>DS<sub>2</sub>VASc, mean (SD)</b></td><td></td><td></td><td></td><td></td></tr><tr><td><b>HAS-BLED, mean (SD)</b></td><td></td><td></td><td></td><td></td></tr><tr><td><b>Standard dose</b></td><td>100</td><td></td><td></td><td></td></tr><tr><td><b>Reduced dose</b></td><td>-</td><td></td><td></td><td></td></tr><tr><td><b>Comorbidities</b></td><td></td><td></td><td></td><td></td></tr><tr><td>Ischemic stroke, or systemic embolism, or TIA</td><td>-</td><td>-</td><td>-</td><td>-</td></tr><tr><td>Heart failure</td><td>-</td><td>-</td><td>-</td><td>-</td></tr><tr><td>Mvocardial infarction</td><td>-</td><td>-</td><td>-</td><td>-</td></tr></table> |                           | Dabigatran<br>(n = 4907) | Rivaroxaban<br>(n = 1649)           | Warfarin<br>(n = 39 607) | All<br>participants<br>(n = 46 163) | <b>Women</b> | 30.9 | 51.5 | 46.9 | 45.3 | <b>Age, mean (SD)</b> | 62.0 (12.0) | 57.6 (9.8) | 57.4 (13.5) | 57.6 (13.3) | ≥ 65 years | 32.8 | 17.5 | 22.4 | 23.3 | >75 years | - | - | - | - | >85 years | - | - | - | - | <b>CHA<sub>2</sub>DS<sub>2</sub>VASc, mean (SD)</b> |  |  |  |  | <b>HAS-BLED, mean (SD)</b> |  |  |  |  | <b>Standard dose</b> | 100 |  |  |  | <b>Reduced dose</b> | - |  |  |  | <b>Comorbidities</b> |  |  |  |  | Ischemic stroke, or systemic embolism, or TIA | - | - | - | - | Heart failure | - | - | - | - | Mvocardial infarction | - | - | - | - |
|                                                                                                                    | Dabigatran<br>(n = 4907)                                                                                                                                                                                                                                                                                                                                                                                                                                                                                                                                                                                                                                                                                                                                                                                                                                                                                                                                                                                                                                                                                                                                                                                                                                                                                          | Rivaroxaban<br>(n = 1649) | Warfarin<br>(n = 39 607) | All<br>participants<br>(n = 46 163) |                          |                                     |              |      |      |      |      |                       |             |            |             |             |            |      |      |      |      |           |   |   |   |   |           |   |   |   |   |                                                     |  |  |  |  |                            |  |  |  |  |                      |     |  |  |  |                     |   |  |  |  |                      |  |  |  |  |                                               |   |   |   |   |               |   |   |   |   |                       |   |   |   |   |
| <b>Women</b>                                                                                                       | 30.9                                                                                                                                                                                                                                                                                                                                                                                                                                                                                                                                                                                                                                                                                                                                                                                                                                                                                                                                                                                                                                                                                                                                                                                                                                                                                                              | 51.5                      | 46.9                     | 45.3                                |                          |                                     |              |      |      |      |      |                       |             |            |             |             |            |      |      |      |      |           |   |   |   |   |           |   |   |   |   |                                                     |  |  |  |  |                            |  |  |  |  |                      |     |  |  |  |                     |   |  |  |  |                      |  |  |  |  |                                               |   |   |   |   |               |   |   |   |   |                       |   |   |   |   |
| <b>Age, mean (SD)</b>                                                                                              | 62.0 (12.0)                                                                                                                                                                                                                                                                                                                                                                                                                                                                                                                                                                                                                                                                                                                                                                                                                                                                                                                                                                                                                                                                                                                                                                                                                                                                                                       | 57.6 (9.8)                | 57.4 (13.5)              | 57.6 (13.3)                         |                          |                                     |              |      |      |      |      |                       |             |            |             |             |            |      |      |      |      |           |   |   |   |   |           |   |   |   |   |                                                     |  |  |  |  |                            |  |  |  |  |                      |     |  |  |  |                     |   |  |  |  |                      |  |  |  |  |                                               |   |   |   |   |               |   |   |   |   |                       |   |   |   |   |
| ≥ 65 years                                                                                                         | 32.8                                                                                                                                                                                                                                                                                                                                                                                                                                                                                                                                                                                                                                                                                                                                                                                                                                                                                                                                                                                                                                                                                                                                                                                                                                                                                                              | 17.5                      | 22.4                     | 23.3                                |                          |                                     |              |      |      |      |      |                       |             |            |             |             |            |      |      |      |      |           |   |   |   |   |           |   |   |   |   |                                                     |  |  |  |  |                            |  |  |  |  |                      |     |  |  |  |                     |   |  |  |  |                      |  |  |  |  |                                               |   |   |   |   |               |   |   |   |   |                       |   |   |   |   |
| >75 years                                                                                                          | -                                                                                                                                                                                                                                                                                                                                                                                                                                                                                                                                                                                                                                                                                                                                                                                                                                                                                                                                                                                                                                                                                                                                                                                                                                                                                                                 | -                         | -                        | -                                   |                          |                                     |              |      |      |      |      |                       |             |            |             |             |            |      |      |      |      |           |   |   |   |   |           |   |   |   |   |                                                     |  |  |  |  |                            |  |  |  |  |                      |     |  |  |  |                     |   |  |  |  |                      |  |  |  |  |                                               |   |   |   |   |               |   |   |   |   |                       |   |   |   |   |
| >85 years                                                                                                          | -                                                                                                                                                                                                                                                                                                                                                                                                                                                                                                                                                                                                                                                                                                                                                                                                                                                                                                                                                                                                                                                                                                                                                                                                                                                                                                                 | -                         | -                        | -                                   |                          |                                     |              |      |      |      |      |                       |             |            |             |             |            |      |      |      |      |           |   |   |   |   |           |   |   |   |   |                                                     |  |  |  |  |                            |  |  |  |  |                      |     |  |  |  |                     |   |  |  |  |                      |  |  |  |  |                                               |   |   |   |   |               |   |   |   |   |                       |   |   |   |   |
| <b>CHA<sub>2</sub>DS<sub>2</sub>VASc, mean (SD)</b>                                                                |                                                                                                                                                                                                                                                                                                                                                                                                                                                                                                                                                                                                                                                                                                                                                                                                                                                                                                                                                                                                                                                                                                                                                                                                                                                                                                                   |                           |                          |                                     |                          |                                     |              |      |      |      |      |                       |             |            |             |             |            |      |      |      |      |           |   |   |   |   |           |   |   |   |   |                                                     |  |  |  |  |                            |  |  |  |  |                      |     |  |  |  |                     |   |  |  |  |                      |  |  |  |  |                                               |   |   |   |   |               |   |   |   |   |                       |   |   |   |   |
| <b>HAS-BLED, mean (SD)</b>                                                                                         |                                                                                                                                                                                                                                                                                                                                                                                                                                                                                                                                                                                                                                                                                                                                                                                                                                                                                                                                                                                                                                                                                                                                                                                                                                                                                                                   |                           |                          |                                     |                          |                                     |              |      |      |      |      |                       |             |            |             |             |            |      |      |      |      |           |   |   |   |   |           |   |   |   |   |                                                     |  |  |  |  |                            |  |  |  |  |                      |     |  |  |  |                     |   |  |  |  |                      |  |  |  |  |                                               |   |   |   |   |               |   |   |   |   |                       |   |   |   |   |
| <b>Standard dose</b>                                                                                               | 100                                                                                                                                                                                                                                                                                                                                                                                                                                                                                                                                                                                                                                                                                                                                                                                                                                                                                                                                                                                                                                                                                                                                                                                                                                                                                                               |                           |                          |                                     |                          |                                     |              |      |      |      |      |                       |             |            |             |             |            |      |      |      |      |           |   |   |   |   |           |   |   |   |   |                                                     |  |  |  |  |                            |  |  |  |  |                      |     |  |  |  |                     |   |  |  |  |                      |  |  |  |  |                                               |   |   |   |   |               |   |   |   |   |                       |   |   |   |   |
| <b>Reduced dose</b>                                                                                                | -                                                                                                                                                                                                                                                                                                                                                                                                                                                                                                                                                                                                                                                                                                                                                                                                                                                                                                                                                                                                                                                                                                                                                                                                                                                                                                                 |                           |                          |                                     |                          |                                     |              |      |      |      |      |                       |             |            |             |             |            |      |      |      |      |           |   |   |   |   |           |   |   |   |   |                                                     |  |  |  |  |                            |  |  |  |  |                      |     |  |  |  |                     |   |  |  |  |                      |  |  |  |  |                                               |   |   |   |   |               |   |   |   |   |                       |   |   |   |   |
| <b>Comorbidities</b>                                                                                               |                                                                                                                                                                                                                                                                                                                                                                                                                                                                                                                                                                                                                                                                                                                                                                                                                                                                                                                                                                                                                                                                                                                                                                                                                                                                                                                   |                           |                          |                                     |                          |                                     |              |      |      |      |      |                       |             |            |             |             |            |      |      |      |      |           |   |   |   |   |           |   |   |   |   |                                                     |  |  |  |  |                            |  |  |  |  |                      |     |  |  |  |                     |   |  |  |  |                      |  |  |  |  |                                               |   |   |   |   |               |   |   |   |   |                       |   |   |   |   |
| Ischemic stroke, or systemic embolism, or TIA                                                                      | -                                                                                                                                                                                                                                                                                                                                                                                                                                                                                                                                                                                                                                                                                                                                                                                                                                                                                                                                                                                                                                                                                                                                                                                                                                                                                                                 | -                         | -                        | -                                   |                          |                                     |              |      |      |      |      |                       |             |            |             |             |            |      |      |      |      |           |   |   |   |   |           |   |   |   |   |                                                     |  |  |  |  |                            |  |  |  |  |                      |     |  |  |  |                     |   |  |  |  |                      |  |  |  |  |                                               |   |   |   |   |               |   |   |   |   |                       |   |   |   |   |
| Heart failure                                                                                                      | -                                                                                                                                                                                                                                                                                                                                                                                                                                                                                                                                                                                                                                                                                                                                                                                                                                                                                                                                                                                                                                                                                                                                                                                                                                                                                                                 | -                         | -                        | -                                   |                          |                                     |              |      |      |      |      |                       |             |            |             |             |            |      |      |      |      |           |   |   |   |   |           |   |   |   |   |                                                     |  |  |  |  |                            |  |  |  |  |                      |     |  |  |  |                     |   |  |  |  |                      |  |  |  |  |                                               |   |   |   |   |               |   |   |   |   |                       |   |   |   |   |
| Mvocardial infarction                                                                                              | -                                                                                                                                                                                                                                                                                                                                                                                                                                                                                                                                                                                                                                                                                                                                                                                                                                                                                                                                                                                                                                                                                                                                                                                                                                                                                                                 | -                         | -                        | -                                   |                          |                                     |              |      |      |      |      |                       |             |            |             |             |            |      |      |      |      |           |   |   |   |   |           |   |   |   |   |                                                     |  |  |  |  |                            |  |  |  |  |                      |     |  |  |  |                     |   |  |  |  |                      |  |  |  |  |                                               |   |   |   |   |               |   |   |   |   |                       |   |   |   |   |

|                                                                                                       |                                                                                                                                                                                                                                                                                                                                                                                                                                                                                                                                                                                                                                                                                                                                                                                          |      |      |      |
|-------------------------------------------------------------------------------------------------------|------------------------------------------------------------------------------------------------------------------------------------------------------------------------------------------------------------------------------------------------------------------------------------------------------------------------------------------------------------------------------------------------------------------------------------------------------------------------------------------------------------------------------------------------------------------------------------------------------------------------------------------------------------------------------------------------------------------------------------------------------------------------------------------|------|------|------|
| Vascular disease                                                                                      | -                                                                                                                                                                                                                                                                                                                                                                                                                                                                                                                                                                                                                                                                                                                                                                                        | -    | -    | -    |
| Renal dysfunction                                                                                     | -                                                                                                                                                                                                                                                                                                                                                                                                                                                                                                                                                                                                                                                                                                                                                                                        | -    | -    | -    |
| Renal failure                                                                                         | 4.2                                                                                                                                                                                                                                                                                                                                                                                                                                                                                                                                                                                                                                                                                                                                                                                      | 2.1  | 5.1  | 4.9  |
| Previous bleeding                                                                                     | -                                                                                                                                                                                                                                                                                                                                                                                                                                                                                                                                                                                                                                                                                                                                                                                        | -    | -    | -    |
| Hypertension                                                                                          | -                                                                                                                                                                                                                                                                                                                                                                                                                                                                                                                                                                                                                                                                                                                                                                                        | -    | -    | -    |
| Diabetes                                                                                              | -                                                                                                                                                                                                                                                                                                                                                                                                                                                                                                                                                                                                                                                                                                                                                                                        | -    | -    | -    |
| Cancer                                                                                                | -                                                                                                                                                                                                                                                                                                                                                                                                                                                                                                                                                                                                                                                                                                                                                                                        | -    | -    | -    |
| <b>Concomitant medication</b>                                                                         |                                                                                                                                                                                                                                                                                                                                                                                                                                                                                                                                                                                                                                                                                                                                                                                          |      |      |      |
| Aspirin                                                                                               | -                                                                                                                                                                                                                                                                                                                                                                                                                                                                                                                                                                                                                                                                                                                                                                                        | -    | -    | -    |
| Beta-blocker                                                                                          | -                                                                                                                                                                                                                                                                                                                                                                                                                                                                                                                                                                                                                                                                                                                                                                                        | -    | -    | -    |
| NSAID                                                                                                 | 15.6                                                                                                                                                                                                                                                                                                                                                                                                                                                                                                                                                                                                                                                                                                                                                                                     | 43.7 | 23.9 | 23.7 |
| Calcium channel blocker                                                                               | -                                                                                                                                                                                                                                                                                                                                                                                                                                                                                                                                                                                                                                                                                                                                                                                        | -    | -    | -    |
| Renin angiotensin system inhibitor                                                                    | -                                                                                                                                                                                                                                                                                                                                                                                                                                                                                                                                                                                                                                                                                                                                                                                        | -    | -    | -    |
| <b>Analysis</b>                                                                                       | <b>Measure of the risk of an end point</b>                                                                                                                                                                                                                                                                                                                                                                                                                                                                                                                                                                                                                                                                                                                                               |      |      |      |
|                                                                                                       | Rate of gastrointestinal bleeding (per 100 person-years)                                                                                                                                                                                                                                                                                                                                                                                                                                                                                                                                                                                                                                                                                                                                 |      |      |      |
|                                                                                                       | <b>Comparison of the risk of an end point between groups</b>                                                                                                                                                                                                                                                                                                                                                                                                                                                                                                                                                                                                                                                                                                                             |      |      |      |
|                                                                                                       | Hazard ratios were derived from Cox proportional hazard models with propensity score weighting and robust estimates of errors                                                                                                                                                                                                                                                                                                                                                                                                                                                                                                                                                                                                                                                            |      |      |      |
|                                                                                                       | <b>Confounding</b>                                                                                                                                                                                                                                                                                                                                                                                                                                                                                                                                                                                                                                                                                                                                                                       |      |      |      |
|                                                                                                       | Propensity score weighting                                                                                                                                                                                                                                                                                                                                                                                                                                                                                                                                                                                                                                                                                                                                                               |      |      |      |
|                                                                                                       | <b>Sensitivity analysis</b>                                                                                                                                                                                                                                                                                                                                                                                                                                                                                                                                                                                                                                                                                                                                                              |      |      |      |
|                                                                                                       | Two additional models were evaluated: 1 including all variables as regression covariates and another including all variables as stratification factors. Secondly, the length of the washout period was varied from 7 to 30 to 45 days to check the robustness of the results. Thirdly, all inpatient records were censored due to the lack of prescription information during hospital admission in order to examine whether such an exclusion would affect the findings. Finally, the HAS-BLED bleeding risk score was additionally included in the model to control for a patient’s risk of bleeding and examine whether the results would change. Due to the lack of laboratory data, the labile International Normalized Ratio was excluded from the construction of this risk score |      |      |      |
|                                                                                                       | <b>Software for statistical analysis</b>                                                                                                                                                                                                                                                                                                                                                                                                                                                                                                                                                                                                                                                                                                                                                 |      |      |      |
|                                                                                                       | SAS 9.2                                                                                                                                                                                                                                                                                                                                                                                                                                                                                                                                                                                                                                                                                                                                                                                  |      |      |      |
|                                                                                                       | <b>Statistical significance reference</b>                                                                                                                                                                                                                                                                                                                                                                                                                                                                                                                                                                                                                                                                                                                                                |      |      |      |
|                                                                                                       | Statistical significance was determined with 95% confidence intervals and 2-tailed <i>P</i> values ( <i>P</i> ≤ .05)                                                                                                                                                                                                                                                                                                                                                                                                                                                                                                                                                                                                                                                                     |      |      |      |
| NSAIDs, nonsteroidal anti-inflammatory drugs; SD, standard deviation; TIA, transient ischemic attack. |                                                                                                                                                                                                                                                                                                                                                                                                                                                                                                                                                                                                                                                                                                                                                                                          |      |      |      |



|                                                                                                                    |                                                                                                                                                                                                                                                                                                                                                                                                                                                                                                                                                                                                                                                                                                                                                                                                                                                                                                                                                                  |
|--------------------------------------------------------------------------------------------------------------------|------------------------------------------------------------------------------------------------------------------------------------------------------------------------------------------------------------------------------------------------------------------------------------------------------------------------------------------------------------------------------------------------------------------------------------------------------------------------------------------------------------------------------------------------------------------------------------------------------------------------------------------------------------------------------------------------------------------------------------------------------------------------------------------------------------------------------------------------------------------------------------------------------------------------------------------------------------------|
| <b>Study ID</b>                                                                                                    | Coleman et al. <sup>65</sup>                                                                                                                                                                                                                                                                                                                                                                                                                                                                                                                                                                                                                                                                                                                                                                                                                                                                                                                                     |
| <b>Reference</b>                                                                                                   | Coleman CI, Antz M, Bowrin K, Evers T, Simard EP, Bonnemeier H, Cappato R. Real-World Evidence of Stroke Prevention in Patients with Nonvalvular Atrial Fibrillation in the United States: the REVISIT-US Study. <i>Curr Med Res Opin</i> . doi:10.1080/03007995.2016.1237937                                                                                                                                                                                                                                                                                                                                                                                                                                                                                                                                                                                                                                                                                    |
| <b>Objective</b>                                                                                                   | To assess the effectiveness and safety of rivaroxaban or apixaban vs warfarin in nonvalvular atrial fibrillation (NVAF) patients treated outside of clinical trials                                                                                                                                                                                                                                                                                                                                                                                                                                                                                                                                                                                                                                                                                                                                                                                              |
| <b>Country</b>                                                                                                     | United States                                                                                                                                                                                                                                                                                                                                                                                                                                                                                                                                                                                                                                                                                                                                                                                                                                                                                                                                                    |
| <b>Design</b>                                                                                                      | Retrospective cohort study                                                                                                                                                                                                                                                                                                                                                                                                                                                                                                                                                                                                                                                                                                                                                                                                                                                                                                                                       |
| <b>Data source</b>                                                                                                 | MarketScan covers all age groups and contains claims from about 100 employers, health plans, and government and public organizations representing about 170 million covered lives in the US (health plan enrollment records, limited participant demographics, International Classification of Diseases, Ninth Revision, Clinical Modification [ICD-9-CM] diagnosis and procedure codes, admission and discharge dates, inpatient mortality data, and outpatient medical services and prescription drug dispensing records). It combines 2 separate databases: <ul style="list-style-type: none"> <li>• Commercial</li> <li>• Medicare supplemental database</li> </ul>                                                                                                                                                                                                                                                                                          |
| <b>Time period</b>                                                                                                 | January 2012 to October 2014                                                                                                                                                                                                                                                                                                                                                                                                                                                                                                                                                                                                                                                                                                                                                                                                                                                                                                                                     |
| <b>NOAC</b>                                                                                                        | Rivaroxaban 15 mg once daily<br>Rivaroxaban 20 mg once daily<br>Apixaban 2.5 mg twice daily<br>Apixaban 5 mg twice daily                                                                                                                                                                                                                                                                                                                                                                                                                                                                                                                                                                                                                                                                                                                                                                                                                                         |
| <b>Control</b>                                                                                                     | Warfarin                                                                                                                                                                                                                                                                                                                                                                                                                                                                                                                                                                                                                                                                                                                                                                                                                                                                                                                                                         |
| <b>Outcomes</b>                                                                                                    | <b>Effectiveness</b><br>Ischemic stroke<br>Intracranial hemorrhage (ICH)<br>ICH and ischemic stroke combined<br><b>Safety</b><br>ICH                                                                                                                                                                                                                                                                                                                                                                                                                                                                                                                                                                                                                                                                                                                                                                                                                             |
| <b>Outcome definitions</b>                                                                                         | ICD-9-CM                                                                                                                                                                                                                                                                                                                                                                                                                                                                                                                                                                                                                                                                                                                                                                                                                                                                                                                                                         |
| <b>Population (eligibility)</b>                                                                                    | Patients had to be oral anticoagulant (OAC) treatment-naïve in the 180 days prior to the day of the first qualifying OAC dispensing, newly initiated on rivaroxaban, apixaban, or warfarin, ≥ 18 years of age on the day of the first qualifying OAC dispensing (index date), with a baseline CHA <sub>2</sub> DS <sub>2</sub> -VAsC score ≥ 2, ≥ 2 ICD-9-CM diagnosis codes for NVAF (427.31), and ≥ 180 days of continuous medical and prescription coverage prior to OAC initiation<br>Patients with valvular heart disease, a transient cause of NVAF, venous thromboembolism, hip or knee replacement surgery, malignant cancer, or pregnancy, and patients receiving OAC before the index date, or prescribed > 1 OAC agent on the index date or during follow-up were excluded. In addition, patients with a prior history of stroke, systemic embolism, or ICH were excluded from the analysis to prevent misclassification of past events as new events |
| <b>Population (study sample)</b>                                                                                   | <b>Study population</b><br>N = 38 831 NVAF patients newly initiated on rivaroxaban<br>Rivaroxaban, n = 12 748<br>Warfarin, n = 26 083<br>N = 18 591 NVAF patients newly initiated on apixaban<br>Apixaban, n = 4332<br>Warfarin, n = 14 259<br><b>Target population</b><br>From the 38 831 patients with rivaroxaban, 10.5% could not be adequately matched and were therefore excluded from the analyses. Following propensity-scoring, 11 411 rivaroxaban (17.3% received the reduced 15 mg once daily) and 11 411 warfarin users were matched<br>From the 18 591 apixaban, 5.7% patients could not be adequately matched and were therefore excluded from the analyses. Following propensity-scoring, 4083 apixaban and 4083 warfarin users were included                                                                                                                                                                                                     |
| <b>Population (baseline participant characteristics)</b> (values expressed as percentages unless otherwise stated) |                                                                                                                                                                                                                                                                                                                                                                                                                                                                                                                                                                                                                                                                                                                                                                                                                                                                                                                                                                  |
|                                                                                                                    |                                                                                                                                                                                                                                                                                                                                                                                                                                                                                                                                                                                                                                                                                                                                                                                                                                                                                                                                                                  |

|                                                                                                                                              | Rivaroxaban                                                                                                                                              | Warfarin      | Apixaban      | Warfarin      |
|----------------------------------------------------------------------------------------------------------------------------------------------|----------------------------------------------------------------------------------------------------------------------------------------------------------|---------------|---------------|---------------|
| Women                                                                                                                                        | 46.4                                                                                                                                                     | 46.1          | 46.8          | 46.4          |
| Age, mean (SD)                                                                                                                               | 70.66 (10.99)                                                                                                                                            | 70.72 (11.35) | 71.00 (11.25) | 71.15 (11.32) |
| >65 years                                                                                                                                    | -                                                                                                                                                        | -             | -             | -             |
| >75 years                                                                                                                                    | -                                                                                                                                                        | -             | -             | -             |
| >85 years                                                                                                                                    | -                                                                                                                                                        | -             | -             | -             |
| CHA <sub>2</sub> DS <sub>2</sub> VASc, mean (SD)                                                                                             | 3.46 (1.37)                                                                                                                                              | 3.48 (1.35)   | 3.47 (1.38)   | 3.47 (1.35)   |
| HAS-BLED, mean (SD)                                                                                                                          | 1.62 (0.69)                                                                                                                                              | 1.62 (0.71)   | 1.65 (0.69)   | 1.66 (0.72)   |
| Standard dose                                                                                                                                | 82.7                                                                                                                                                     | -             | 84.5          | -             |
| Reduced dose                                                                                                                                 | 17.3                                                                                                                                                     | -             | 15.5          | -             |
| Comorbidities                                                                                                                                |                                                                                                                                                          |               |               |               |
| Ischemic stroke, or systemic embolism, or TIA                                                                                                | -                                                                                                                                                        | -             | -             | -             |
| Heart failure                                                                                                                                | 19.8                                                                                                                                                     | 20.0          | 19.1          | 19.0          |
| Myocardial infarction                                                                                                                        | -                                                                                                                                                        | -             | -             | -             |
| Vascular disease                                                                                                                             | -                                                                                                                                                        | -             | -             | -             |
| Renal failure                                                                                                                                | 1.2                                                                                                                                                      | 1.2           | 1.8           | 1.8           |
| Previous bleeding                                                                                                                            |                                                                                                                                                          |               |               |               |
| Hypertension                                                                                                                                 | 93.4                                                                                                                                                     | 93.7          | 94.9          | 94.6          |
| Diabetes mellitus                                                                                                                            | 34.3                                                                                                                                                     | 34.9          | 34.1          | 33.8          |
| Cancer                                                                                                                                       | -                                                                                                                                                        | -             | -             | -             |
| Concomitant medication                                                                                                                       |                                                                                                                                                          |               |               |               |
| Aspirin (see below)                                                                                                                          | -                                                                                                                                                        | -             | -             | -             |
| Antiplatelet medication                                                                                                                      | 11.0                                                                                                                                                     | 10.9          | 10.8          | 10.8          |
| Beta-blocker                                                                                                                                 | 51.1                                                                                                                                                     | 51.4          | 56.0          | 55.3          |
| NSAID                                                                                                                                        | 16.3                                                                                                                                                     | 16.0          | 16.7          | 16.7          |
| Calcium channel blocker                                                                                                                      | 34.4                                                                                                                                                     | 34.6          | 37.1          | 35.8          |
| Renin angiotensin system inhibitor                                                                                                           | -                                                                                                                                                        | -             | -             | -             |
| Analysis                                                                                                                                     | Measure of the risk of an end point                                                                                                                      |               |               |               |
|                                                                                                                                              | Incidence rates of end points (number of events per 100 person-years or %/year)                                                                          |               |               |               |
|                                                                                                                                              | Comparison of the risk of an end point between groups                                                                                                    |               |               |               |
|                                                                                                                                              | Cox proportional hazards regression analysis was performed to estimate hazard ratios with 95% confidence intervals for the development of each end point |               |               |               |
|                                                                                                                                              | Software for statistical analysis                                                                                                                        |               |               |               |
|                                                                                                                                              | Aetion Evidence Generation Platform - Effectiveness Evaluation Application version R2.0.20160113_2214-0 g6871884                                         |               |               |               |
|                                                                                                                                              | Statistical significance reference                                                                                                                       |               |               |               |
|                                                                                                                                              | P < .05 was considered statistically significant                                                                                                         |               |               |               |
| NSAIDs, nonsteroidal anti-inflammatory drugs; NVAf, nonvalvular atrial fibrillation; SD, standard deviation; TIA, transient ischemic attack. |                                                                                                                                                          |               |               |               |

|                                                                                                                    |                                                                                                                                                                                                                                                                                                                                                                                                                                                                                                                                                                                                                                                                                                                                                                                                                                                                                                                                                                                                                                                                                                                                                                                                                                                                                                                                                                                                                                                                                                                                                                                                                                                                                                                                                                                                                                |            |             |            |                  |          |                  |       |   |      |      |      |      |             |   |   |    |    |   |           |   |   |   |   |   |           |   |   |   |   |   |           |   |   |   |   |   |                                               |   |   |   |   |   |                     |   |   |   |   |   |               |   |      |     |     |      |              |   |      |   |   |      |               |   |   |   |   |   |                                               |   |   |   |   |   |               |   |   |   |   |   |                       |   |   |   |   |   |                  |   |   |   |   |   |                   |   |   |   |   |   |                   |   |   |   |   |   |              |   |   |   |   |   |          |   |   |   |   |   |        |   |   |   |   |   |
|--------------------------------------------------------------------------------------------------------------------|--------------------------------------------------------------------------------------------------------------------------------------------------------------------------------------------------------------------------------------------------------------------------------------------------------------------------------------------------------------------------------------------------------------------------------------------------------------------------------------------------------------------------------------------------------------------------------------------------------------------------------------------------------------------------------------------------------------------------------------------------------------------------------------------------------------------------------------------------------------------------------------------------------------------------------------------------------------------------------------------------------------------------------------------------------------------------------------------------------------------------------------------------------------------------------------------------------------------------------------------------------------------------------------------------------------------------------------------------------------------------------------------------------------------------------------------------------------------------------------------------------------------------------------------------------------------------------------------------------------------------------------------------------------------------------------------------------------------------------------------------------------------------------------------------------------------------------|------------|-------------|------------|------------------|----------|------------------|-------|---|------|------|------|------|-------------|---|---|----|----|---|-----------|---|---|---|---|---|-----------|---|---|---|---|---|-----------|---|---|---|---|---|-----------------------------------------------|---|---|---|---|---|---------------------|---|---|---|---|---|---------------|---|------|-----|-----|------|--------------|---|------|---|---|------|---------------|---|---|---|---|---|-----------------------------------------------|---|---|---|---|---|---------------|---|---|---|---|---|-----------------------|---|---|---|---|---|------------------|---|---|---|---|---|-------------------|---|---|---|---|---|-------------------|---|---|---|---|---|--------------|---|---|---|---|---|----------|---|---|---|---|---|--------|---|---|---|---|---|
| Study ID                                                                                                           | Ellis et al. <sup>10</sup>                                                                                                                                                                                                                                                                                                                                                                                                                                                                                                                                                                                                                                                                                                                                                                                                                                                                                                                                                                                                                                                                                                                                                                                                                                                                                                                                                                                                                                                                                                                                                                                                                                                                                                                                                                                                     |            |             |            |                  |          |                  |       |   |      |      |      |      |             |   |   |    |    |   |           |   |   |   |   |   |           |   |   |   |   |   |           |   |   |   |   |   |                                               |   |   |   |   |   |                     |   |   |   |   |   |               |   |      |     |     |      |              |   |      |   |   |      |               |   |   |   |   |   |                                               |   |   |   |   |   |               |   |   |   |   |   |                       |   |   |   |   |   |                  |   |   |   |   |   |                   |   |   |   |   |   |                   |   |   |   |   |   |              |   |   |   |   |   |          |   |   |   |   |   |        |   |   |   |   |   |
| Reference                                                                                                          | Ellis MH, Neuman T, Bitterman H, Dotan SG, Hammerman A, Battat E, et al. Bleeding in patients with atrial fibrillation treated with dabigatran, rivaroxaban or warfarin: A retrospective population-based cohort study. <i>Eur J Intern Med.</i> 2016;33:55-59. doi:10.1016/j.ejim.2016.05.023                                                                                                                                                                                                                                                                                                                                                                                                                                                                                                                                                                                                                                                                                                                                                                                                                                                                                                                                                                                                                                                                                                                                                                                                                                                                                                                                                                                                                                                                                                                                 |            |             |            |                  |          |                  |       |   |      |      |      |      |             |   |   |    |    |   |           |   |   |   |   |   |           |   |   |   |   |   |           |   |   |   |   |   |                                               |   |   |   |   |   |                     |   |   |   |   |   |               |   |      |     |     |      |              |   |      |   |   |      |               |   |   |   |   |   |                                               |   |   |   |   |   |               |   |   |   |   |   |                       |   |   |   |   |   |                  |   |   |   |   |   |                   |   |   |   |   |   |                   |   |   |   |   |   |              |   |   |   |   |   |          |   |   |   |   |   |        |   |   |   |   |   |
| Objective                                                                                                          | To determine the incidence of bleeding in patients with atrial fibrillation (AF) receiving dabigatran, rivaroxaban, or warfarin                                                                                                                                                                                                                                                                                                                                                                                                                                                                                                                                                                                                                                                                                                                                                                                                                                                                                                                                                                                                                                                                                                                                                                                                                                                                                                                                                                                                                                                                                                                                                                                                                                                                                                |            |             |            |                  |          |                  |       |   |      |      |      |      |             |   |   |    |    |   |           |   |   |   |   |   |           |   |   |   |   |   |           |   |   |   |   |   |                                               |   |   |   |   |   |                     |   |   |   |   |   |               |   |      |     |     |      |              |   |      |   |   |      |               |   |   |   |   |   |                                               |   |   |   |   |   |               |   |   |   |   |   |                       |   |   |   |   |   |                  |   |   |   |   |   |                   |   |   |   |   |   |                   |   |   |   |   |   |              |   |   |   |   |   |          |   |   |   |   |   |        |   |   |   |   |   |
| Country                                                                                                            | Israel                                                                                                                                                                                                                                                                                                                                                                                                                                                                                                                                                                                                                                                                                                                                                                                                                                                                                                                                                                                                                                                                                                                                                                                                                                                                                                                                                                                                                                                                                                                                                                                                                                                                                                                                                                                                                         |            |             |            |                  |          |                  |       |   |      |      |      |      |             |   |   |    |    |   |           |   |   |   |   |   |           |   |   |   |   |   |           |   |   |   |   |   |                                               |   |   |   |   |   |                     |   |   |   |   |   |               |   |      |     |     |      |              |   |      |   |   |      |               |   |   |   |   |   |                                               |   |   |   |   |   |               |   |   |   |   |   |                       |   |   |   |   |   |                  |   |   |   |   |   |                   |   |   |   |   |   |                   |   |   |   |   |   |              |   |   |   |   |   |          |   |   |   |   |   |        |   |   |   |   |   |
| Design                                                                                                             | Retrospective population-based cohort study                                                                                                                                                                                                                                                                                                                                                                                                                                                                                                                                                                                                                                                                                                                                                                                                                                                                                                                                                                                                                                                                                                                                                                                                                                                                                                                                                                                                                                                                                                                                                                                                                                                                                                                                                                                    |            |             |            |                  |          |                  |       |   |      |      |      |      |             |   |   |    |    |   |           |   |   |   |   |   |           |   |   |   |   |   |           |   |   |   |   |   |                                               |   |   |   |   |   |                     |   |   |   |   |   |               |   |      |     |     |      |              |   |      |   |   |      |               |   |   |   |   |   |                                               |   |   |   |   |   |               |   |   |   |   |   |                       |   |   |   |   |   |                  |   |   |   |   |   |                   |   |   |   |   |   |                   |   |   |   |   |   |              |   |   |   |   |   |          |   |   |   |   |   |        |   |   |   |   |   |
| Data source                                                                                                        | Nationwide computerized database, covering 4.3 million subjects                                                                                                                                                                                                                                                                                                                                                                                                                                                                                                                                                                                                                                                                                                                                                                                                                                                                                                                                                                                                                                                                                                                                                                                                                                                                                                                                                                                                                                                                                                                                                                                                                                                                                                                                                                |            |             |            |                  |          |                  |       |   |      |      |      |      |             |   |   |    |    |   |           |   |   |   |   |   |           |   |   |   |   |   |           |   |   |   |   |   |                                               |   |   |   |   |   |                     |   |   |   |   |   |               |   |      |     |     |      |              |   |      |   |   |      |               |   |   |   |   |   |                                               |   |   |   |   |   |               |   |   |   |   |   |                       |   |   |   |   |   |                  |   |   |   |   |   |                   |   |   |   |   |   |                   |   |   |   |   |   |              |   |   |   |   |   |          |   |   |   |   |   |        |   |   |   |   |   |
| Time period                                                                                                        | January 2011 to December 2013                                                                                                                                                                                                                                                                                                                                                                                                                                                                                                                                                                                                                                                                                                                                                                                                                                                                                                                                                                                                                                                                                                                                                                                                                                                                                                                                                                                                                                                                                                                                                                                                                                                                                                                                                                                                  |            |             |            |                  |          |                  |       |   |      |      |      |      |             |   |   |    |    |   |           |   |   |   |   |   |           |   |   |   |   |   |           |   |   |   |   |   |                                               |   |   |   |   |   |                     |   |   |   |   |   |               |   |      |     |     |      |              |   |      |   |   |      |               |   |   |   |   |   |                                               |   |   |   |   |   |               |   |   |   |   |   |                       |   |   |   |   |   |                  |   |   |   |   |   |                   |   |   |   |   |   |                   |   |   |   |   |   |              |   |   |   |   |   |          |   |   |   |   |   |        |   |   |   |   |   |
| NOAC                                                                                                               | Rivaroxaban 20 mg once daily<br>Dabigatran 300 mg daily or 220 mg daily                                                                                                                                                                                                                                                                                                                                                                                                                                                                                                                                                                                                                                                                                                                                                                                                                                                                                                                                                                                                                                                                                                                                                                                                                                                                                                                                                                                                                                                                                                                                                                                                                                                                                                                                                        |            |             |            |                  |          |                  |       |   |      |      |      |      |             |   |   |    |    |   |           |   |   |   |   |   |           |   |   |   |   |   |           |   |   |   |   |   |                                               |   |   |   |   |   |                     |   |   |   |   |   |               |   |      |     |     |      |              |   |      |   |   |      |               |   |   |   |   |   |                                               |   |   |   |   |   |               |   |   |   |   |   |                       |   |   |   |   |   |                  |   |   |   |   |   |                   |   |   |   |   |   |                   |   |   |   |   |   |              |   |   |   |   |   |          |   |   |   |   |   |        |   |   |   |   |   |
| Control                                                                                                            | Warfarin (2.5 mg dose tablets)<br>Target INR 2.0-3.0                                                                                                                                                                                                                                                                                                                                                                                                                                                                                                                                                                                                                                                                                                                                                                                                                                                                                                                                                                                                                                                                                                                                                                                                                                                                                                                                                                                                                                                                                                                                                                                                                                                                                                                                                                           |            |             |            |                  |          |                  |       |   |      |      |      |      |             |   |   |    |    |   |           |   |   |   |   |   |           |   |   |   |   |   |           |   |   |   |   |   |                                               |   |   |   |   |   |                     |   |   |   |   |   |               |   |      |     |     |      |              |   |      |   |   |      |               |   |   |   |   |   |                                               |   |   |   |   |   |               |   |   |   |   |   |                       |   |   |   |   |   |                  |   |   |   |   |   |                   |   |   |   |   |   |                   |   |   |   |   |   |              |   |   |   |   |   |          |   |   |   |   |   |        |   |   |   |   |   |
| Outcomes                                                                                                           | <b>Effectiveness</b><br>None<br><b>Safety</b><br>Any bleeding<br>Intracranial hemorrhage<br>Gastrointestinal bleeding<br>Mortality within 30 days of hemorrhage                                                                                                                                                                                                                                                                                                                                                                                                                                                                                                                                                                                                                                                                                                                                                                                                                                                                                                                                                                                                                                                                                                                                                                                                                                                                                                                                                                                                                                                                                                                                                                                                                                                                |            |             |            |                  |          |                  |       |   |      |      |      |      |             |   |   |    |    |   |           |   |   |   |   |   |           |   |   |   |   |   |           |   |   |   |   |   |                                               |   |   |   |   |   |                     |   |   |   |   |   |               |   |      |     |     |      |              |   |      |   |   |      |               |   |   |   |   |   |                                               |   |   |   |   |   |               |   |   |   |   |   |                       |   |   |   |   |   |                  |   |   |   |   |   |                   |   |   |   |   |   |                   |   |   |   |   |   |              |   |   |   |   |   |          |   |   |   |   |   |        |   |   |   |   |   |
| Outcome definitions                                                                                                | Not provided                                                                                                                                                                                                                                                                                                                                                                                                                                                                                                                                                                                                                                                                                                                                                                                                                                                                                                                                                                                                                                                                                                                                                                                                                                                                                                                                                                                                                                                                                                                                                                                                                                                                                                                                                                                                                   |            |             |            |                  |          |                  |       |   |      |      |      |      |             |   |   |    |    |   |           |   |   |   |   |   |           |   |   |   |   |   |           |   |   |   |   |   |                                               |   |   |   |   |   |                     |   |   |   |   |   |               |   |      |     |     |      |              |   |      |   |   |      |               |   |   |   |   |   |                                               |   |   |   |   |   |               |   |   |   |   |   |                       |   |   |   |   |   |                  |   |   |   |   |   |                   |   |   |   |   |   |                   |   |   |   |   |   |              |   |   |   |   |   |          |   |   |   |   |   |        |   |   |   |   |   |
| Population (eligibility)                                                                                           | Patients with AF, prescribed warfarin, dabigatran (300 or 220 mg daily), or rivaroxaban for the first time and for a minimum of 3 consecutive months between January 2011 and December 2013                                                                                                                                                                                                                                                                                                                                                                                                                                                                                                                                                                                                                                                                                                                                                                                                                                                                                                                                                                                                                                                                                                                                                                                                                                                                                                                                                                                                                                                                                                                                                                                                                                    |            |             |            |                  |          |                  |       |   |      |      |      |      |             |   |   |    |    |   |           |   |   |   |   |   |           |   |   |   |   |   |           |   |   |   |   |   |                                               |   |   |   |   |   |                     |   |   |   |   |   |               |   |      |     |     |      |              |   |      |   |   |      |               |   |   |   |   |   |                                               |   |   |   |   |   |               |   |   |   |   |   |                       |   |   |   |   |   |                  |   |   |   |   |   |                   |   |   |   |   |   |                   |   |   |   |   |   |              |   |   |   |   |   |          |   |   |   |   |   |        |   |   |   |   |   |
| Population (study sample)                                                                                          | <b>Study population</b> 18 249<br>Warfarin, n = 9564 (52.4%)<br>Dabigatran, n = 5976 (32.7%):<br>1806 (9.9%) received the recommended dose (300 mg daily)<br>4170 (22.8%) received the reduced dose (220 mg daily)<br>Rivaroxaban, n = 2709 (14.8%)<br><b>Target population</b><br>18 249 patients with AF, admitted to hospital with hemorrhage, receiving dabigatran, rivaroxaban, or warfarin                                                                                                                                                                                                                                                                                                                                                                                                                                                                                                                                                                                                                                                                                                                                                                                                                                                                                                                                                                                                                                                                                                                                                                                                                                                                                                                                                                                                                               |            |             |            |                  |          |                  |       |   |      |      |      |      |             |   |   |    |    |   |           |   |   |   |   |   |           |   |   |   |   |   |           |   |   |   |   |   |                                               |   |   |   |   |   |                     |   |   |   |   |   |               |   |      |     |     |      |              |   |      |   |   |      |               |   |   |   |   |   |                                               |   |   |   |   |   |               |   |   |   |   |   |                       |   |   |   |   |   |                  |   |   |   |   |   |                   |   |   |   |   |   |                   |   |   |   |   |   |              |   |   |   |   |   |          |   |   |   |   |   |        |   |   |   |   |   |
| <b>Population (baseline participant characteristics)</b> (values expressed as percentages unless otherwise stated) |                                                                                                                                                                                                                                                                                                                                                                                                                                                                                                                                                                                                                                                                                                                                                                                                                                                                                                                                                                                                                                                                                                                                                                                                                                                                                                                                                                                                                                                                                                                                                                                                                                                                                                                                                                                                                                |            |             |            |                  |          |                  |       |   |      |      |      |      |             |   |   |    |    |   |           |   |   |   |   |   |           |   |   |   |   |   |           |   |   |   |   |   |                                               |   |   |   |   |   |                     |   |   |   |   |   |               |   |      |     |     |      |              |   |      |   |   |      |               |   |   |   |   |   |                                               |   |   |   |   |   |               |   |   |   |   |   |                       |   |   |   |   |   |                  |   |   |   |   |   |                   |   |   |   |   |   |                   |   |   |   |   |   |              |   |   |   |   |   |          |   |   |   |   |   |        |   |   |   |   |   |
|                                                                                                                    | <table><tr><td></td><td>Apixaban</td><td>Dabigatran</td><td>Rivaroxaban</td><td>Warfarin</td><td>All participants</td></tr><tr><td>Women</td><td>-</td><td>46.4</td><td>38.6</td><td>43.8</td><td>43.9</td></tr><tr><td>Age, median</td><td>-</td><td>-</td><td>82</td><td>79</td><td>-</td></tr><tr><td>&gt;65 years</td><td>-</td><td>-</td><td>-</td><td>-</td><td>-</td></tr><tr><td>&gt;75 years</td><td>-</td><td>-</td><td>-</td><td>-</td><td>-</td></tr><tr><td>&gt;85 years</td><td>-</td><td>-</td><td>-</td><td>-</td><td>-</td></tr><tr><td>CHA<sub>2</sub>DS<sub>2</sub>VASc, median</td><td>-</td><td>-</td><td>4</td><td>3</td><td>-</td></tr><tr><td>HAS-BLED, mean (SD)</td><td>-</td><td>-</td><td>-</td><td>-</td><td>-</td></tr><tr><td>Standard dose</td><td>-</td><td>30.2</td><td>100</td><td>100</td><td>77.1</td></tr><tr><td>Reduced dose</td><td>-</td><td>69.8</td><td>0</td><td>0</td><td>22.9</td></tr><tr><td>Comorbidities</td><td>-</td><td>-</td><td>-</td><td>-</td><td>-</td></tr><tr><td>Ischemic stroke, or systemic embolism, or TIA</td><td>-</td><td>-</td><td>-</td><td>-</td><td>-</td></tr><tr><td>Heart failure</td><td>-</td><td>-</td><td>-</td><td>-</td><td>-</td></tr><tr><td>Myocardial infarction</td><td>-</td><td>-</td><td>-</td><td>-</td><td>-</td></tr><tr><td>Vascular disease</td><td>-</td><td>-</td><td>-</td><td>-</td><td>-</td></tr><tr><td>Renal dysfunction</td><td>-</td><td>-</td><td>-</td><td>-</td><td>-</td></tr><tr><td>Previous bleeding</td><td>-</td><td>-</td><td>-</td><td>-</td><td>-</td></tr><tr><td>Hypertension</td><td>-</td><td>-</td><td>-</td><td>-</td><td>-</td></tr><tr><td>Diabetes</td><td>-</td><td>-</td><td>-</td><td>-</td><td>-</td></tr><tr><td>Cancer</td><td>-</td><td>-</td><td>-</td><td>-</td><td>-</td></tr></table> |            | Apixaban    | Dabigatran | Rivaroxaban      | Warfarin | All participants | Women | - | 46.4 | 38.6 | 43.8 | 43.9 | Age, median | - | - | 82 | 79 | - | >65 years | - | - | - | - | - | >75 years | - | - | - | - | - | >85 years | - | - | - | - | - | CHA <sub>2</sub> DS <sub>2</sub> VASc, median | - | - | 4 | 3 | - | HAS-BLED, mean (SD) | - | - | - | - | - | Standard dose | - | 30.2 | 100 | 100 | 77.1 | Reduced dose | - | 69.8 | 0 | 0 | 22.9 | Comorbidities | - | - | - | - | - | Ischemic stroke, or systemic embolism, or TIA | - | - | - | - | - | Heart failure | - | - | - | - | - | Myocardial infarction | - | - | - | - | - | Vascular disease | - | - | - | - | - | Renal dysfunction | - | - | - | - | - | Previous bleeding | - | - | - | - | - | Hypertension | - | - | - | - | - | Diabetes | - | - | - | - | - | Cancer | - | - | - | - | - |
|                                                                                                                    | Apixaban                                                                                                                                                                                                                                                                                                                                                                                                                                                                                                                                                                                                                                                                                                                                                                                                                                                                                                                                                                                                                                                                                                                                                                                                                                                                                                                                                                                                                                                                                                                                                                                                                                                                                                                                                                                                                       | Dabigatran | Rivaroxaban | Warfarin   | All participants |          |                  |       |   |      |      |      |      |             |   |   |    |    |   |           |   |   |   |   |   |           |   |   |   |   |   |           |   |   |   |   |   |                                               |   |   |   |   |   |                     |   |   |   |   |   |               |   |      |     |     |      |              |   |      |   |   |      |               |   |   |   |   |   |                                               |   |   |   |   |   |               |   |   |   |   |   |                       |   |   |   |   |   |                  |   |   |   |   |   |                   |   |   |   |   |   |                   |   |   |   |   |   |              |   |   |   |   |   |          |   |   |   |   |   |        |   |   |   |   |   |
| Women                                                                                                              | -                                                                                                                                                                                                                                                                                                                                                                                                                                                                                                                                                                                                                                                                                                                                                                                                                                                                                                                                                                                                                                                                                                                                                                                                                                                                                                                                                                                                                                                                                                                                                                                                                                                                                                                                                                                                                              | 46.4       | 38.6        | 43.8       | 43.9             |          |                  |       |   |      |      |      |      |             |   |   |    |    |   |           |   |   |   |   |   |           |   |   |   |   |   |           |   |   |   |   |   |                                               |   |   |   |   |   |                     |   |   |   |   |   |               |   |      |     |     |      |              |   |      |   |   |      |               |   |   |   |   |   |                                               |   |   |   |   |   |               |   |   |   |   |   |                       |   |   |   |   |   |                  |   |   |   |   |   |                   |   |   |   |   |   |                   |   |   |   |   |   |              |   |   |   |   |   |          |   |   |   |   |   |        |   |   |   |   |   |
| Age, median                                                                                                        | -                                                                                                                                                                                                                                                                                                                                                                                                                                                                                                                                                                                                                                                                                                                                                                                                                                                                                                                                                                                                                                                                                                                                                                                                                                                                                                                                                                                                                                                                                                                                                                                                                                                                                                                                                                                                                              | -          | 82          | 79         | -                |          |                  |       |   |      |      |      |      |             |   |   |    |    |   |           |   |   |   |   |   |           |   |   |   |   |   |           |   |   |   |   |   |                                               |   |   |   |   |   |                     |   |   |   |   |   |               |   |      |     |     |      |              |   |      |   |   |      |               |   |   |   |   |   |                                               |   |   |   |   |   |               |   |   |   |   |   |                       |   |   |   |   |   |                  |   |   |   |   |   |                   |   |   |   |   |   |                   |   |   |   |   |   |              |   |   |   |   |   |          |   |   |   |   |   |        |   |   |   |   |   |
| >65 years                                                                                                          | -                                                                                                                                                                                                                                                                                                                                                                                                                                                                                                                                                                                                                                                                                                                                                                                                                                                                                                                                                                                                                                                                                                                                                                                                                                                                                                                                                                                                                                                                                                                                                                                                                                                                                                                                                                                                                              | -          | -           | -          | -                |          |                  |       |   |      |      |      |      |             |   |   |    |    |   |           |   |   |   |   |   |           |   |   |   |   |   |           |   |   |   |   |   |                                               |   |   |   |   |   |                     |   |   |   |   |   |               |   |      |     |     |      |              |   |      |   |   |      |               |   |   |   |   |   |                                               |   |   |   |   |   |               |   |   |   |   |   |                       |   |   |   |   |   |                  |   |   |   |   |   |                   |   |   |   |   |   |                   |   |   |   |   |   |              |   |   |   |   |   |          |   |   |   |   |   |        |   |   |   |   |   |
| >75 years                                                                                                          | -                                                                                                                                                                                                                                                                                                                                                                                                                                                                                                                                                                                                                                                                                                                                                                                                                                                                                                                                                                                                                                                                                                                                                                                                                                                                                                                                                                                                                                                                                                                                                                                                                                                                                                                                                                                                                              | -          | -           | -          | -                |          |                  |       |   |      |      |      |      |             |   |   |    |    |   |           |   |   |   |   |   |           |   |   |   |   |   |           |   |   |   |   |   |                                               |   |   |   |   |   |                     |   |   |   |   |   |               |   |      |     |     |      |              |   |      |   |   |      |               |   |   |   |   |   |                                               |   |   |   |   |   |               |   |   |   |   |   |                       |   |   |   |   |   |                  |   |   |   |   |   |                   |   |   |   |   |   |                   |   |   |   |   |   |              |   |   |   |   |   |          |   |   |   |   |   |        |   |   |   |   |   |
| >85 years                                                                                                          | -                                                                                                                                                                                                                                                                                                                                                                                                                                                                                                                                                                                                                                                                                                                                                                                                                                                                                                                                                                                                                                                                                                                                                                                                                                                                                                                                                                                                                                                                                                                                                                                                                                                                                                                                                                                                                              | -          | -           | -          | -                |          |                  |       |   |      |      |      |      |             |   |   |    |    |   |           |   |   |   |   |   |           |   |   |   |   |   |           |   |   |   |   |   |                                               |   |   |   |   |   |                     |   |   |   |   |   |               |   |      |     |     |      |              |   |      |   |   |      |               |   |   |   |   |   |                                               |   |   |   |   |   |               |   |   |   |   |   |                       |   |   |   |   |   |                  |   |   |   |   |   |                   |   |   |   |   |   |                   |   |   |   |   |   |              |   |   |   |   |   |          |   |   |   |   |   |        |   |   |   |   |   |
| CHA <sub>2</sub> DS <sub>2</sub> VASc, median                                                                      | -                                                                                                                                                                                                                                                                                                                                                                                                                                                                                                                                                                                                                                                                                                                                                                                                                                                                                                                                                                                                                                                                                                                                                                                                                                                                                                                                                                                                                                                                                                                                                                                                                                                                                                                                                                                                                              | -          | 4           | 3          | -                |          |                  |       |   |      |      |      |      |             |   |   |    |    |   |           |   |   |   |   |   |           |   |   |   |   |   |           |   |   |   |   |   |                                               |   |   |   |   |   |                     |   |   |   |   |   |               |   |      |     |     |      |              |   |      |   |   |      |               |   |   |   |   |   |                                               |   |   |   |   |   |               |   |   |   |   |   |                       |   |   |   |   |   |                  |   |   |   |   |   |                   |   |   |   |   |   |                   |   |   |   |   |   |              |   |   |   |   |   |          |   |   |   |   |   |        |   |   |   |   |   |
| HAS-BLED, mean (SD)                                                                                                | -                                                                                                                                                                                                                                                                                                                                                                                                                                                                                                                                                                                                                                                                                                                                                                                                                                                                                                                                                                                                                                                                                                                                                                                                                                                                                                                                                                                                                                                                                                                                                                                                                                                                                                                                                                                                                              | -          | -           | -          | -                |          |                  |       |   |      |      |      |      |             |   |   |    |    |   |           |   |   |   |   |   |           |   |   |   |   |   |           |   |   |   |   |   |                                               |   |   |   |   |   |                     |   |   |   |   |   |               |   |      |     |     |      |              |   |      |   |   |      |               |   |   |   |   |   |                                               |   |   |   |   |   |               |   |   |   |   |   |                       |   |   |   |   |   |                  |   |   |   |   |   |                   |   |   |   |   |   |                   |   |   |   |   |   |              |   |   |   |   |   |          |   |   |   |   |   |        |   |   |   |   |   |
| Standard dose                                                                                                      | -                                                                                                                                                                                                                                                                                                                                                                                                                                                                                                                                                                                                                                                                                                                                                                                                                                                                                                                                                                                                                                                                                                                                                                                                                                                                                                                                                                                                                                                                                                                                                                                                                                                                                                                                                                                                                              | 30.2       | 100         | 100        | 77.1             |          |                  |       |   |      |      |      |      |             |   |   |    |    |   |           |   |   |   |   |   |           |   |   |   |   |   |           |   |   |   |   |   |                                               |   |   |   |   |   |                     |   |   |   |   |   |               |   |      |     |     |      |              |   |      |   |   |      |               |   |   |   |   |   |                                               |   |   |   |   |   |               |   |   |   |   |   |                       |   |   |   |   |   |                  |   |   |   |   |   |                   |   |   |   |   |   |                   |   |   |   |   |   |              |   |   |   |   |   |          |   |   |   |   |   |        |   |   |   |   |   |
| Reduced dose                                                                                                       | -                                                                                                                                                                                                                                                                                                                                                                                                                                                                                                                                                                                                                                                                                                                                                                                                                                                                                                                                                                                                                                                                                                                                                                                                                                                                                                                                                                                                                                                                                                                                                                                                                                                                                                                                                                                                                              | 69.8       | 0           | 0          | 22.9             |          |                  |       |   |      |      |      |      |             |   |   |    |    |   |           |   |   |   |   |   |           |   |   |   |   |   |           |   |   |   |   |   |                                               |   |   |   |   |   |                     |   |   |   |   |   |               |   |      |     |     |      |              |   |      |   |   |      |               |   |   |   |   |   |                                               |   |   |   |   |   |               |   |   |   |   |   |                       |   |   |   |   |   |                  |   |   |   |   |   |                   |   |   |   |   |   |                   |   |   |   |   |   |              |   |   |   |   |   |          |   |   |   |   |   |        |   |   |   |   |   |
| Comorbidities                                                                                                      | -                                                                                                                                                                                                                                                                                                                                                                                                                                                                                                                                                                                                                                                                                                                                                                                                                                                                                                                                                                                                                                                                                                                                                                                                                                                                                                                                                                                                                                                                                                                                                                                                                                                                                                                                                                                                                              | -          | -           | -          | -                |          |                  |       |   |      |      |      |      |             |   |   |    |    |   |           |   |   |   |   |   |           |   |   |   |   |   |           |   |   |   |   |   |                                               |   |   |   |   |   |                     |   |   |   |   |   |               |   |      |     |     |      |              |   |      |   |   |      |               |   |   |   |   |   |                                               |   |   |   |   |   |               |   |   |   |   |   |                       |   |   |   |   |   |                  |   |   |   |   |   |                   |   |   |   |   |   |                   |   |   |   |   |   |              |   |   |   |   |   |          |   |   |   |   |   |        |   |   |   |   |   |
| Ischemic stroke, or systemic embolism, or TIA                                                                      | -                                                                                                                                                                                                                                                                                                                                                                                                                                                                                                                                                                                                                                                                                                                                                                                                                                                                                                                                                                                                                                                                                                                                                                                                                                                                                                                                                                                                                                                                                                                                                                                                                                                                                                                                                                                                                              | -          | -           | -          | -                |          |                  |       |   |      |      |      |      |             |   |   |    |    |   |           |   |   |   |   |   |           |   |   |   |   |   |           |   |   |   |   |   |                                               |   |   |   |   |   |                     |   |   |   |   |   |               |   |      |     |     |      |              |   |      |   |   |      |               |   |   |   |   |   |                                               |   |   |   |   |   |               |   |   |   |   |   |                       |   |   |   |   |   |                  |   |   |   |   |   |                   |   |   |   |   |   |                   |   |   |   |   |   |              |   |   |   |   |   |          |   |   |   |   |   |        |   |   |   |   |   |
| Heart failure                                                                                                      | -                                                                                                                                                                                                                                                                                                                                                                                                                                                                                                                                                                                                                                                                                                                                                                                                                                                                                                                                                                                                                                                                                                                                                                                                                                                                                                                                                                                                                                                                                                                                                                                                                                                                                                                                                                                                                              | -          | -           | -          | -                |          |                  |       |   |      |      |      |      |             |   |   |    |    |   |           |   |   |   |   |   |           |   |   |   |   |   |           |   |   |   |   |   |                                               |   |   |   |   |   |                     |   |   |   |   |   |               |   |      |     |     |      |              |   |      |   |   |      |               |   |   |   |   |   |                                               |   |   |   |   |   |               |   |   |   |   |   |                       |   |   |   |   |   |                  |   |   |   |   |   |                   |   |   |   |   |   |                   |   |   |   |   |   |              |   |   |   |   |   |          |   |   |   |   |   |        |   |   |   |   |   |
| Myocardial infarction                                                                                              | -                                                                                                                                                                                                                                                                                                                                                                                                                                                                                                                                                                                                                                                                                                                                                                                                                                                                                                                                                                                                                                                                                                                                                                                                                                                                                                                                                                                                                                                                                                                                                                                                                                                                                                                                                                                                                              | -          | -           | -          | -                |          |                  |       |   |      |      |      |      |             |   |   |    |    |   |           |   |   |   |   |   |           |   |   |   |   |   |           |   |   |   |   |   |                                               |   |   |   |   |   |                     |   |   |   |   |   |               |   |      |     |     |      |              |   |      |   |   |      |               |   |   |   |   |   |                                               |   |   |   |   |   |               |   |   |   |   |   |                       |   |   |   |   |   |                  |   |   |   |   |   |                   |   |   |   |   |   |                   |   |   |   |   |   |              |   |   |   |   |   |          |   |   |   |   |   |        |   |   |   |   |   |
| Vascular disease                                                                                                   | -                                                                                                                                                                                                                                                                                                                                                                                                                                                                                                                                                                                                                                                                                                                                                                                                                                                                                                                                                                                                                                                                                                                                                                                                                                                                                                                                                                                                                                                                                                                                                                                                                                                                                                                                                                                                                              | -          | -           | -          | -                |          |                  |       |   |      |      |      |      |             |   |   |    |    |   |           |   |   |   |   |   |           |   |   |   |   |   |           |   |   |   |   |   |                                               |   |   |   |   |   |                     |   |   |   |   |   |               |   |      |     |     |      |              |   |      |   |   |      |               |   |   |   |   |   |                                               |   |   |   |   |   |               |   |   |   |   |   |                       |   |   |   |   |   |                  |   |   |   |   |   |                   |   |   |   |   |   |                   |   |   |   |   |   |              |   |   |   |   |   |          |   |   |   |   |   |        |   |   |   |   |   |
| Renal dysfunction                                                                                                  | -                                                                                                                                                                                                                                                                                                                                                                                                                                                                                                                                                                                                                                                                                                                                                                                                                                                                                                                                                                                                                                                                                                                                                                                                                                                                                                                                                                                                                                                                                                                                                                                                                                                                                                                                                                                                                              | -          | -           | -          | -                |          |                  |       |   |      |      |      |      |             |   |   |    |    |   |           |   |   |   |   |   |           |   |   |   |   |   |           |   |   |   |   |   |                                               |   |   |   |   |   |                     |   |   |   |   |   |               |   |      |     |     |      |              |   |      |   |   |      |               |   |   |   |   |   |                                               |   |   |   |   |   |               |   |   |   |   |   |                       |   |   |   |   |   |                  |   |   |   |   |   |                   |   |   |   |   |   |                   |   |   |   |   |   |              |   |   |   |   |   |          |   |   |   |   |   |        |   |   |   |   |   |
| Previous bleeding                                                                                                  | -                                                                                                                                                                                                                                                                                                                                                                                                                                                                                                                                                                                                                                                                                                                                                                                                                                                                                                                                                                                                                                                                                                                                                                                                                                                                                                                                                                                                                                                                                                                                                                                                                                                                                                                                                                                                                              | -          | -           | -          | -                |          |                  |       |   |      |      |      |      |             |   |   |    |    |   |           |   |   |   |   |   |           |   |   |   |   |   |           |   |   |   |   |   |                                               |   |   |   |   |   |                     |   |   |   |   |   |               |   |      |     |     |      |              |   |      |   |   |      |               |   |   |   |   |   |                                               |   |   |   |   |   |               |   |   |   |   |   |                       |   |   |   |   |   |                  |   |   |   |   |   |                   |   |   |   |   |   |                   |   |   |   |   |   |              |   |   |   |   |   |          |   |   |   |   |   |        |   |   |   |   |   |
| Hypertension                                                                                                       | -                                                                                                                                                                                                                                                                                                                                                                                                                                                                                                                                                                                                                                                                                                                                                                                                                                                                                                                                                                                                                                                                                                                                                                                                                                                                                                                                                                                                                                                                                                                                                                                                                                                                                                                                                                                                                              | -          | -           | -          | -                |          |                  |       |   |      |      |      |      |             |   |   |    |    |   |           |   |   |   |   |   |           |   |   |   |   |   |           |   |   |   |   |   |                                               |   |   |   |   |   |                     |   |   |   |   |   |               |   |      |     |     |      |              |   |      |   |   |      |               |   |   |   |   |   |                                               |   |   |   |   |   |               |   |   |   |   |   |                       |   |   |   |   |   |                  |   |   |   |   |   |                   |   |   |   |   |   |                   |   |   |   |   |   |              |   |   |   |   |   |          |   |   |   |   |   |        |   |   |   |   |   |
| Diabetes                                                                                                           | -                                                                                                                                                                                                                                                                                                                                                                                                                                                                                                                                                                                                                                                                                                                                                                                                                                                                                                                                                                                                                                                                                                                                                                                                                                                                                                                                                                                                                                                                                                                                                                                                                                                                                                                                                                                                                              | -          | -           | -          | -                |          |                  |       |   |      |      |      |      |             |   |   |    |    |   |           |   |   |   |   |   |           |   |   |   |   |   |           |   |   |   |   |   |                                               |   |   |   |   |   |                     |   |   |   |   |   |               |   |      |     |     |      |              |   |      |   |   |      |               |   |   |   |   |   |                                               |   |   |   |   |   |               |   |   |   |   |   |                       |   |   |   |   |   |                  |   |   |   |   |   |                   |   |   |   |   |   |                   |   |   |   |   |   |              |   |   |   |   |   |          |   |   |   |   |   |        |   |   |   |   |   |
| Cancer                                                                                                             | -                                                                                                                                                                                                                                                                                                                                                                                                                                                                                                                                                                                                                                                                                                                                                                                                                                                                                                                                                                                                                                                                                                                                                                                                                                                                                                                                                                                                                                                                                                                                                                                                                                                                                                                                                                                                                              | -          | -           | -          | -                |          |                  |       |   |      |      |      |      |             |   |   |    |    |   |           |   |   |   |   |   |           |   |   |   |   |   |           |   |   |   |   |   |                                               |   |   |   |   |   |                     |   |   |   |   |   |               |   |      |     |     |      |              |   |      |   |   |      |               |   |   |   |   |   |                                               |   |   |   |   |   |               |   |   |   |   |   |                       |   |   |   |   |   |                  |   |   |   |   |   |                   |   |   |   |   |   |                   |   |   |   |   |   |              |   |   |   |   |   |          |   |   |   |   |   |        |   |   |   |   |   |

|                                                                                                                                                                                    |                                                                                                            |      |    |    |      |
|------------------------------------------------------------------------------------------------------------------------------------------------------------------------------------|------------------------------------------------------------------------------------------------------------|------|----|----|------|
| <b>Concomitant medication</b>                                                                                                                                                      |                                                                                                            |      |    |    |      |
| Aspirin (reported as antiplatelet drug use)                                                                                                                                        | -                                                                                                          | 39.5 | 55 | 52 | 48.3 |
| Beta-blocker                                                                                                                                                                       | -                                                                                                          | -    | -  | -  | -    |
| NSAID                                                                                                                                                                              | -                                                                                                          | -    | -  | -  | -    |
| Calcium channel blocker                                                                                                                                                            | -                                                                                                          | -    | -  | -  | -    |
| Renin angiotensin system inhibitor                                                                                                                                                 | -                                                                                                          | -    | -  | -  | -    |
| <b>Analysis</b>                                                                                                                                                                    | <b>Measure of the risk of an end point</b>                                                                 |      |    |    |      |
|                                                                                                                                                                                    | Rates of bleeding per 100 patient-years and associated 95% confidence intervals                            |      |    |    |      |
|                                                                                                                                                                                    | <b>Comparison of the risk of an end point between groups</b>                                               |      |    |    |      |
|                                                                                                                                                                                    | Assessment of whether the 95% confidence intervals for bleeding rates in the groups overlap                |      |    |    |      |
|                                                                                                                                                                                    | Cox regression analysis of time to bleeding or censoring (warfarin as reference)                           |      |    |    |      |
|                                                                                                                                                                                    | <b>Confounding</b>                                                                                         |      |    |    |      |
|                                                                                                                                                                                    | Cox regression analysis adjusted for age, sex, serum creatinine, CHADS <sub>2</sub> score, and aspirin use |      |    |    |      |
|                                                                                                                                                                                    | <b>Sensitivity analysis</b>                                                                                |      |    |    |      |
|                                                                                                                                                                                    | Not reported                                                                                               |      |    |    |      |
|                                                                                                                                                                                    | <b>Supplementary analyses</b>                                                                              |      |    |    |      |
| Not reported                                                                                                                                                                       |                                                                                                            |      |    |    |      |
| <b>Software for statistical analysis</b>                                                                                                                                           |                                                                                                            |      |    |    |      |
| SPSS version 21                                                                                                                                                                    |                                                                                                            |      |    |    |      |
| <b>Statistical significance reference</b>                                                                                                                                          |                                                                                                            |      |    |    |      |
| <i>P</i> < .05                                                                                                                                                                     |                                                                                                            |      |    |    |      |
| AF, atrial fibrillation; NOACs, nonvitamin K antagonist oral anticoagulants; NSAIDs, nonsteroidal anti-inflammatory drugs; SD, standard deviation; TIA, transient ischemic attack. |                                                                                                            |      |    |    |      |

|                                  |                                                                                                                                                                                                                                                                                                                                                                                                                                                                                                                                                                                                                                          |
|----------------------------------|------------------------------------------------------------------------------------------------------------------------------------------------------------------------------------------------------------------------------------------------------------------------------------------------------------------------------------------------------------------------------------------------------------------------------------------------------------------------------------------------------------------------------------------------------------------------------------------------------------------------------------------|
| <b>Study ID</b>                  | Fontaine et al. <sup>11</sup>                                                                                                                                                                                                                                                                                                                                                                                                                                                                                                                                                                                                            |
| <b>Reference</b>                 | Fontaine GV, Mathews KD, Woller SC, Stevens SM, Lloyd JF, Evans RS. Major bleeding with dabigatran and rivaroxaban in patients with atrial fibrillation: A real-world setting. <i>Clin Appl Thromb Hemost</i> . 2014;20:665-672. doi:10.1177/1076029614536606                                                                                                                                                                                                                                                                                                                                                                            |
| <b>Objective</b>                 | To assess risk of bleeding among “real-world” patients with atrial fibrillation (AF) taking novel oral anticoagulants                                                                                                                                                                                                                                                                                                                                                                                                                                                                                                                    |
| <b>Country</b>                   | United States                                                                                                                                                                                                                                                                                                                                                                                                                                                                                                                                                                                                                            |
| <b>Design</b>                    | Nationwide cohort study (retrospective electronic medical record and chart review)                                                                                                                                                                                                                                                                                                                                                                                                                                                                                                                                                       |
| <b>Data source</b>               | Enterprise Data Warehouse (EDW) at Intermountain Healthcare: the EDW is a central data repository that houses all medical record data for patient encounters at Intermountain Healthcare hospitals, clinics, and pharmacies                                                                                                                                                                                                                                                                                                                                                                                                              |
| <b>Time period</b>               | October 2010 and November 2012                                                                                                                                                                                                                                                                                                                                                                                                                                                                                                                                                                                                           |
| <b>NOAC</b>                      | Dabigatran<br>Rivaroxaban                                                                                                                                                                                                                                                                                                                                                                                                                                                                                                                                                                                                                |
| <b>Control</b>                   | Warfarin                                                                                                                                                                                                                                                                                                                                                                                                                                                                                                                                                                                                                                 |
| <b>Outcomes</b>                  | <b>Safety</b><br>Major bleeding                                                                                                                                                                                                                                                                                                                                                                                                                                                                                                                                                                                                          |
| <b>Outcome definitions</b>       | Major bleeding was defined as fatal bleeding, bleeding into a critical organ or organ space including intracranial, intraspinal, intraocular, intraarticular, peritoneal, and pericardial, or other bleeding in the setting of the transfusion of $\geq 2$ units of packed red blood cells. This included bleeding into the gastrointestinal or genitourinary tracts. Omitted from the definition of major bleeding was a solitary drop in hemoglobin of $\geq 2$ mg/dL in the absence of clinically overt bleeding due to the lack of specificity (eg, hemoglobin changes can occur for reasons other than bleeding, such as hydration) |
| <b>Population (eligibility)</b>  | Patients were included if they had a diagnosis of AF and were receiving either dabigatran or rivaroxaban<br><br>To ensure that the included patients were actively receiving a novel oral anticoagulant and had not been initially provided a prescription for a novel oral anticoagulant and then were switched back to warfarin, patients with an International Normalized Ratio (INR) of $\geq 1.8$ in the 90 days following initiation of either dabigatran or rivaroxaban were excluded from the final analysis                                                                                                                     |
| <b>Population (study sample)</b> | <b>Study population</b><br>N = 2579 patients<br><b>Target population</b><br>N = 6910<br>Excluded:<br>Encounters were removed because of patient duplication, n = 1951<br>Without atrial fibrillation, n = 1884<br>Not experiencing major bleeds, n = 487<br>Major bleeding while not taking a novel oral anticoagulant within the previous 7 days, n = 2<br>Major bleeding after transitioning back to warfarin therapy, n = 5<br>No evidence of major bleeding on manual chart review, n = 2                                                                                                                                            |

|                                                                                                                    |                                                                                                                                                                                                                                                                                                                                                                                                                                                                                                                                                  |
|--------------------------------------------------------------------------------------------------------------------|--------------------------------------------------------------------------------------------------------------------------------------------------------------------------------------------------------------------------------------------------------------------------------------------------------------------------------------------------------------------------------------------------------------------------------------------------------------------------------------------------------------------------------------------------|
| Study ID                                                                                                           | Forslund et al. <sup>66</sup>                                                                                                                                                                                                                                                                                                                                                                                                                                                                                                                    |
| Reference                                                                                                          | Forslund T, Wettermark B, Andersen M, Hjemdahl P. Stroke and bleeding with non-vitamin K antagonist oral anticoagulant or warfarin treatment in patients with non-valvular atrial fibrillation: a population-based cohort study. <i>Europace</i> . 2017;20:420-428. doi:10.1093/europace/euw416                                                                                                                                                                                                                                                  |
| Objective                                                                                                          | To evaluate both effectiveness and safety outcomes with NOAC vs warfarin treatment in OAC-naïve patients with NVAF in routine care, including primary care, in a large region with decentralized OAC treatment                                                                                                                                                                                                                                                                                                                                   |
| Country                                                                                                            | Sweden                                                                                                                                                                                                                                                                                                                                                                                                                                                                                                                                           |
| Design                                                                                                             | Nationwide cohort study                                                                                                                                                                                                                                                                                                                                                                                                                                                                                                                          |
| Data source                                                                                                        | The Stockholm administrative health data register (VAL), which contains pseudonymized data on diagnoses, age, sex, prescription claims, hospitalizations and other health care consultations, migration, and death for all individuals in the region. The VAL also contains individual level data on all prescription drugs dispensed anywhere in Sweden to inhabitants in the region since July 2010: amounts, expenditures and reimbursement, patient age and sex, copayments, and prescriber category                                         |
| Time period                                                                                                        | January 2012 until December 2015                                                                                                                                                                                                                                                                                                                                                                                                                                                                                                                 |
| NOAC                                                                                                               | Dabigatran<br>Rivaroxaban<br>Apixaban                                                                                                                                                                                                                                                                                                                                                                                                                                                                                                            |
| Control                                                                                                            | Warfarin                                                                                                                                                                                                                                                                                                                                                                                                                                                                                                                                         |
| Outcomes                                                                                                           | <b>Effectiveness</b><br>TIA/ischemic or unspecified stroke/death<br><b>Safety</b><br>Severe bleeds                                                                                                                                                                                                                                                                                                                                                                                                                                               |
| Outcome definitions                                                                                                | Severe bleeds were defined as intracranial bleeds, gastrointestinal bleeds, esophageal bleeds from varicose veins, hemothorax, hemopericardium, intraocular bleeding, or anemia due to an acute major bleed                                                                                                                                                                                                                                                                                                                                      |
| Population (eligibility)                                                                                           | All individuals with nonvalvular AF who had a first claim of either a NOAC or warfarin from January 2012 until December 2015 were included<br>Patients were excluded if they had no diagnosis of AF from 2003 until the first claim of the drug of inclusion or if they had a prior diagnosis or procedure code for a mechanical valve or mitral stenosis. Each individual was only included once, that is, at the date of the first treatment claimed                                                                                           |
| Population (study sample)                                                                                          | <b>Study population</b><br>Initiation of anticoagulant treatment with warfarin (n = 12 919) or NOAC (n = 9279) in OAC-naïve patients with NVAF<br>Dabigatran, n = 3322<br>Rivaroxaban, n = 2370<br>Apixaban, n = 3587<br><b>Target population</b><br>N = 20 588<br>Excluded:<br>No previous diagnosis of atrial fibrillation: warfarin, n = 7786; NOAC, n = 7113<br>Diagnosis of or procedure code for mechanical valve or mitral stenosis: warfarin, n = 253; NOAC, n = 134<br>Prior anticoagulant treatment: warfarin, n = 633; NOAC, n = 4062 |
| <b>Population (baseline participant characteristics)</b> (values expressed as percentages unless otherwise stated) |                                                                                                                                                                                                                                                                                                                                                                                                                                                                                                                                                  |
|                                                                                                                    | <b>Warfarin</b> <b>NOAC</b> <b>Dabigatran</b> <b>Rivaroxaban</b> <b>Apixaban</b>                                                                                                                                                                                                                                                                                                                                                                                                                                                                 |
| <b>Women</b>                                                                                                       | 44.643.540.045.445.4                                                                                                                                                                                                                                                                                                                                                                                                                                                                                                                             |
| <b>Age, median (SD)</b>                                                                                            | 74.1 (11.0)72.9 (11.1)69.9 (11.3)74.0 (10.3)75.0 (10.8)                                                                                                                                                                                                                                                                                                                                                                                                                                                                                          |
| 65-74 years                                                                                                        | 32.136.339.535.833.7                                                                                                                                                                                                                                                                                                                                                                                                                                                                                                                             |
| 75-79 years                                                                                                        | 16.815.413.617.315.7                                                                                                                                                                                                                                                                                                                                                                                                                                                                                                                             |
| >80 years                                                                                                          | 34.429.220.131.536.1                                                                                                                                                                                                                                                                                                                                                                                                                                                                                                                             |
| <b>CHA<sub>2</sub>DS<sub>2</sub>VASc, mean (SD)</b>                                                                | 3.68 (1.91)3.42 (1.91)3.01 (1.89)3.59 (1.88)3.69 (1.90)                                                                                                                                                                                                                                                                                                                                                                                                                                                                                          |
| <b>HAS-BLED, mean (SD)</b>                                                                                         |                                                                                                                                                                                                                                                                                                                                                                                                                                                                                                                                                  |
| <b>Comorbidities</b>                                                                                               |                                                                                                                                                                                                                                                                                                                                                                                                                                                                                                                                                  |

|                                                                                                                                                                                                  |                                                                                                                                                                                                                                                                                                                                                                                                                                                                                                          |      |      |      |      |
|--------------------------------------------------------------------------------------------------------------------------------------------------------------------------------------------------|----------------------------------------------------------------------------------------------------------------------------------------------------------------------------------------------------------------------------------------------------------------------------------------------------------------------------------------------------------------------------------------------------------------------------------------------------------------------------------------------------------|------|------|------|------|
| Ischemic stroke, or systemic embolism, or TIA                                                                                                                                                    | -                                                                                                                                                                                                                                                                                                                                                                                                                                                                                                        | -    | -    | -    | -    |
| Ischemic stroke/TIA or peripheral embolus                                                                                                                                                        | 21.1                                                                                                                                                                                                                                                                                                                                                                                                                                                                                                     | 20.4 | 18.2 | 20.4 | 22.4 |
| Heart failure                                                                                                                                                                                    | 26.3                                                                                                                                                                                                                                                                                                                                                                                                                                                                                                     | 23.0 | 19.4 | 25.0 | 25.0 |
| Myocardial infarction                                                                                                                                                                            | -                                                                                                                                                                                                                                                                                                                                                                                                                                                                                                        | -    | -    | -    | -    |
| Vascular disease                                                                                                                                                                                 | 30.2                                                                                                                                                                                                                                                                                                                                                                                                                                                                                                     | 24.5 | 20.1 | 27.8 | 26.3 |
| Renal dysfunction                                                                                                                                                                                | 7.9                                                                                                                                                                                                                                                                                                                                                                                                                                                                                                      | 5.0  | 2.1  | 5.5  | 7.4  |
| Previous bleeding (see below)                                                                                                                                                                    | -                                                                                                                                                                                                                                                                                                                                                                                                                                                                                                        | -    | -    | -    | -    |
| Gastric/duodenal bleeding                                                                                                                                                                        | 1.0                                                                                                                                                                                                                                                                                                                                                                                                                                                                                                      | 0.9  | 0.7  | 1.0  | 1.1  |
| Intracranial bleed                                                                                                                                                                               | 1.8                                                                                                                                                                                                                                                                                                                                                                                                                                                                                                      | 2.9  | 2.6  | 3.0  | 3.3  |
| Any severe bleed                                                                                                                                                                                 | 7.6                                                                                                                                                                                                                                                                                                                                                                                                                                                                                                      | 9.4  | 7.5  | 10.0 | 10.8 |
| Hypertension                                                                                                                                                                                     | 70.1                                                                                                                                                                                                                                                                                                                                                                                                                                                                                                     | 67.8 | 63.1 | 68.4 | 71.7 |
| Diabetes                                                                                                                                                                                         | 20.1                                                                                                                                                                                                                                                                                                                                                                                                                                                                                                     | 17.1 | 15.0 | 18.1 | 18.4 |
| Cancer                                                                                                                                                                                           | 22.2                                                                                                                                                                                                                                                                                                                                                                                                                                                                                                     | 22.1 | 18.6 | 22.3 | 25.2 |
| <b>Concomitant medication</b>                                                                                                                                                                    |                                                                                                                                                                                                                                                                                                                                                                                                                                                                                                          |      |      |      |      |
| Aspirin (see below)                                                                                                                                                                              | -                                                                                                                                                                                                                                                                                                                                                                                                                                                                                                        | -    | -    | -    | -    |
| Prior low-dose aspirin                                                                                                                                                                           | 47.8                                                                                                                                                                                                                                                                                                                                                                                                                                                                                                     | 44.9 | 42.6 | 51.1 | 42.8 |
| Beta-blocker                                                                                                                                                                                     | -                                                                                                                                                                                                                                                                                                                                                                                                                                                                                                        | -    | -    | -    | -    |
| NSAID                                                                                                                                                                                            | -                                                                                                                                                                                                                                                                                                                                                                                                                                                                                                        | -    | -    | -    | -    |
| Calcium channel blocker                                                                                                                                                                          | -                                                                                                                                                                                                                                                                                                                                                                                                                                                                                                        | -    | -    | -    | -    |
| Renin angiotensin system inhibitor                                                                                                                                                               | -                                                                                                                                                                                                                                                                                                                                                                                                                                                                                                        | -    | -    | -    | -    |
| <b>Analysis</b>                                                                                                                                                                                  | <b>Measure of the risk of an end point</b>                                                                                                                                                                                                                                                                                                                                                                                                                                                               |      |      |      |      |
|                                                                                                                                                                                                  | Crude estimates with data presented as proportions or mean values with 95% confidence intervals, as appropriate                                                                                                                                                                                                                                                                                                                                                                                          |      |      |      |      |
|                                                                                                                                                                                                  | <b>Comparison of the risk of an end point between groups</b>                                                                                                                                                                                                                                                                                                                                                                                                                                             |      |      |      |      |
|                                                                                                                                                                                                  | Cox regression analyses were performed for crude and adjusted estimates evaluating 2 coprimary end points: the composite end point—TIA/ischemic or unspecified stroke/death (adjusted for individual CHA <sub>2</sub> DS <sub>2</sub> -VASc criteria with age as a continuous variable)—and severe bleeds, adjusted for sex and adapted HAS-BLED criteria (anemia, severe bleed, TIA/stroke, liver disease, renal disease, alcoholism, and prior antiplatelet therapy) with age as a continuous variable |      |      |      |      |
|                                                                                                                                                                                                  | <b>Software for statistical analysis</b>                                                                                                                                                                                                                                                                                                                                                                                                                                                                 |      |      |      |      |
|                                                                                                                                                                                                  | SAS Enterprise Guide 6.1 (SAS Institute Inc, Cary, North Carolina)                                                                                                                                                                                                                                                                                                                                                                                                                                       |      |      |      |      |
|                                                                                                                                                                                                  | <b>Statistical significance reference</b>                                                                                                                                                                                                                                                                                                                                                                                                                                                                |      |      |      |      |
|                                                                                                                                                                                                  | A 5% level of significance was considered                                                                                                                                                                                                                                                                                                                                                                                                                                                                |      |      |      |      |
| NOACs, nonvitamin K antagonist oral anticoagulants; NSAIDs, nonsteroidal anti-inflammatory drugs; NVAf, nonvalvular atrial fibrillation; SD, standard deviation; TIA, transient ischemic attack. |                                                                                                                                                                                                                                                                                                                                                                                                                                                                                                          |      |      |      |      |

|                                                                                                                                                                                                                                                                                                                                                                                                                                                                                                                             |                                                                                                                                                                                                                                                                                                                                                                                                                                                                                                                                                                                                                                                                                                                                                                                                                                                                                                                |      |                      |       |                       |      |                       |       |  |  |  |      |     |         |       |      |     |         |       |       |      |      |      |      |      |      |      |      |                |      |      |      |      |      |      |      |      |
|-----------------------------------------------------------------------------------------------------------------------------------------------------------------------------------------------------------------------------------------------------------------------------------------------------------------------------------------------------------------------------------------------------------------------------------------------------------------------------------------------------------------------------|----------------------------------------------------------------------------------------------------------------------------------------------------------------------------------------------------------------------------------------------------------------------------------------------------------------------------------------------------------------------------------------------------------------------------------------------------------------------------------------------------------------------------------------------------------------------------------------------------------------------------------------------------------------------------------------------------------------------------------------------------------------------------------------------------------------------------------------------------------------------------------------------------------------|------|----------------------|-------|-----------------------|------|-----------------------|-------|--|--|--|------|-----|---------|-------|------|-----|---------|-------|-------|------|------|------|------|------|------|------|------|----------------|------|------|------|------|------|------|------|------|
| Study ID                                                                                                                                                                                                                                                                                                                                                                                                                                                                                                                    | Gieling et al. <sup>67</sup>                                                                                                                                                                                                                                                                                                                                                                                                                                                                                                                                                                                                                                                                                                                                                                                                                                                                                   |      |                      |       |                       |      |                       |       |  |  |  |      |     |         |       |      |     |         |       |       |      |      |      |      |      |      |      |      |                |      |      |      |      |      |      |      |      |
| Reference                                                                                                                                                                                                                                                                                                                                                                                                                                                                                                                   | Gieling EM, van den Ham HA, van Onzenoort H, Bos J, Kramers C, de Boer A. Risk of major bleeding and stroke associated with the use of vitamin K antagonists, nonvitamin K antagonist oral anticoagulants and aspirin in patients with atrial fibrillation: A cohort study. <i>Br J Clin Pharmacol</i> . 2017;83:1844-1859. doi:10.1111/bcp.13265                                                                                                                                                                                                                                                                                                                                                                                                                                                                                                                                                              |      |                      |       |                       |      |                       |       |  |  |  |      |     |         |       |      |     |         |       |       |      |      |      |      |      |      |      |      |                |      |      |      |      |      |      |      |      |
| Objective                                                                                                                                                                                                                                                                                                                                                                                                                                                                                                                   | To evaluate the risk of major bleeding and stroke in AF patients using NOACs, VKAs, or aspirin                                                                                                                                                                                                                                                                                                                                                                                                                                                                                                                                                                                                                                                                                                                                                                                                                 |      |                      |       |                       |      |                       |       |  |  |  |      |     |         |       |      |     |         |       |       |      |      |      |      |      |      |      |      |                |      |      |      |      |      |      |      |      |
| Country                                                                                                                                                                                                                                                                                                                                                                                                                                                                                                                     | United Kingdom                                                                                                                                                                                                                                                                                                                                                                                                                                                                                                                                                                                                                                                                                                                                                                                                                                                                                                 |      |                      |       |                       |      |                       |       |  |  |  |      |     |         |       |      |     |         |       |       |      |      |      |      |      |      |      |      |                |      |      |      |      |      |      |      |      |
| Design                                                                                                                                                                                                                                                                                                                                                                                                                                                                                                                      | Retrospective cohort study                                                                                                                                                                                                                                                                                                                                                                                                                                                                                                                                                                                                                                                                                                                                                                                                                                                                                     |      |                      |       |                       |      |                       |       |  |  |  |      |     |         |       |      |     |         |       |       |      |      |      |      |      |      |      |      |                |      |      |      |      |      |      |      |      |
| Data source                                                                                                                                                                                                                                                                                                                                                                                                                                                                                                                 | The Clinical Practice Research Datalink Database (includes demographic information, laboratory tests, specialist referrals, hospital admissions, prescription details, and lifestyle variables such as body mass index, smoking, and alcohol consumption)                                                                                                                                                                                                                                                                                                                                                                                                                                                                                                                                                                                                                                                      |      |                      |       |                       |      |                       |       |  |  |  |      |     |         |       |      |     |         |       |       |      |      |      |      |      |      |      |      |                |      |      |      |      |      |      |      |      |
| Time period                                                                                                                                                                                                                                                                                                                                                                                                                                                                                                                 | March 2008 to October 2014                                                                                                                                                                                                                                                                                                                                                                                                                                                                                                                                                                                                                                                                                                                                                                                                                                                                                     |      |                      |       |                       |      |                       |       |  |  |  |      |     |         |       |      |     |         |       |       |      |      |      |      |      |      |      |      |                |      |      |      |      |      |      |      |      |
| NOAC                                                                                                                                                                                                                                                                                                                                                                                                                                                                                                                        | NOACs<br>VKAs<br>Aspirin                                                                                                                                                                                                                                                                                                                                                                                                                                                                                                                                                                                                                                                                                                                                                                                                                                                                                       |      |                      |       |                       |      |                       |       |  |  |  |      |     |         |       |      |     |         |       |       |      |      |      |      |      |      |      |      |                |      |      |      |      |      |      |      |      |
| Control                                                                                                                                                                                                                                                                                                                                                                                                                                                                                                                     | Warfarin                                                                                                                                                                                                                                                                                                                                                                                                                                                                                                                                                                                                                                                                                                                                                                                                                                                                                                       |      |                      |       |                       |      |                       |       |  |  |  |      |     |         |       |      |     |         |       |       |      |      |      |      |      |      |      |      |                |      |      |      |      |      |      |      |      |
| Outcomes                                                                                                                                                                                                                                                                                                                                                                                                                                                                                                                    | <b>Effectiveness</b><br>Ischemic stroke<br>Hemorrhagic stroke<br><b>Safety</b><br>Major bleeding, gastrointestinal bleeding, intracranial bleeding, stroke                                                                                                                                                                                                                                                                                                                                                                                                                                                                                                                                                                                                                                                                                                                                                     |      |                      |       |                       |      |                       |       |  |  |  |      |     |         |       |      |     |         |       |       |      |      |      |      |      |      |      |      |                |      |      |      |      |      |      |      |      |
| Outcome definitions                                                                                                                                                                                                                                                                                                                                                                                                                                                                                                         | The UK Read code system was used to define outcomes. Major bleeding was defined as bleeding at a critical site or organ and the selected read-codes were reviewed by a clinician for relevancy                                                                                                                                                                                                                                                                                                                                                                                                                                                                                                                                                                                                                                                                                                                 |      |                      |       |                       |      |                       |       |  |  |  |      |     |         |       |      |     |         |       |       |      |      |      |      |      |      |      |      |                |      |      |      |      |      |      |      |      |
| Population (eligibility)                                                                                                                                                                                                                                                                                                                                                                                                                                                                                                    | All patients aged ≥ 18 with a first-ever recorded diagnosis of AF during a patient’s period of valid data collection. Only patients with a follow-up time between 18 March 2008 (the date of market introduction of the NOACs) and 1 October 2014 were included. Within this cohort of AF patients, new users of antithrombotic drugs were identified: VKAs, NOACs, and low-dose (≤ 325 mg) aspirin. New users were defined as patients who had never been exposed to any of the drugs of interest                                                                                                                                                                                                                                                                                                                                                                                                             |      |                      |       |                       |      |                       |       |  |  |  |      |     |         |       |      |     |         |       |       |      |      |      |      |      |      |      |      |                |      |      |      |      |      |      |      |      |
| Population (study sample)                                                                                                                                                                                                                                                                                                                                                                                                                                                                                                   | <b>Study population</b><br>Cohort: stroke, N = 29 446<br>NOAC users, n = 1128<br>VKA users, n = 12 445<br>Aspirin users, n = 15 471<br>Mixed users, n = 402<br>Cohort: major bleeding, N = 30 418<br>NOAC users, n = 1247<br>VKA users, n = 13 177<br>Aspirin users, n = 15 551<br>Mixed users, n = 443<br><b>Target population</b><br>N = 211 126<br>Excluded: <ul style="list-style-type: none"><li>• Under 18 years at AF diagnosis, n = 142</li><li>• AF diagnosis outside valid data collection or study period, n = 131 478</li><li>• Patient’s year of birth was after the left censoring date, n = 24</li><li>• Patients with AF but without prescription of interest before or after AF diagnosis, n = 83 473</li><li>• Patients with prior use of eligible study drug, n = 38 531</li><li>• Patients with previous stroke, n = 2051</li><li>• Patients with previous major bleed, n = 1079</li></ul> |      |                      |       |                       |      |                       |       |  |  |  |      |     |         |       |      |     |         |       |       |      |      |      |      |      |      |      |      |                |      |      |      |      |      |      |      |      |
| <b>Population (baseline participant characteristics)</b> (values expressed as percentages unless otherwise stated)                                                                                                                                                                                                                                                                                                                                                                                                          |                                                                                                                                                                                                                                                                                                                                                                                                                                                                                                                                                                                                                                                                                                                                                                                                                                                                                                                |      |                      |       |                       |      |                       |       |  |  |  |      |     |         |       |      |     |         |       |       |      |      |      |      |      |      |      |      |                |      |      |      |      |      |      |      |      |
| <table><tr><td></td><td colspan="4">Cohort outcome bleed</td><td colspan="4">Cohort outcome stroke</td></tr><tr><td></td><td>NOAC</td><td>VKA</td><td>Aspirin</td><td>Mixed</td><td>NOAC</td><td>VKA</td><td>Aspirin</td><td>Mixed</td></tr><tr><td>Women</td><td>45.4</td><td>46.1</td><td>49.9</td><td>35.9</td><td>44.4</td><td>45.7</td><td>49.5</td><td>35.3</td></tr><tr><td>Age, mean (SD)</td><td>72.4</td><td>71.9</td><td>73.5</td><td>72.2</td><td>72.0</td><td>71.7</td><td>73.4</td><td>71.8</td></tr></table> |                                                                                                                                                                                                                                                                                                                                                                                                                                                                                                                                                                                                                                                                                                                                                                                                                                                                                                                |      | Cohort outcome bleed |       |                       |      | Cohort outcome stroke |       |  |  |  | NOAC | VKA | Aspirin | Mixed | NOAC | VKA | Aspirin | Mixed | Women | 45.4 | 46.1 | 49.9 | 35.9 | 44.4 | 45.7 | 49.5 | 35.3 | Age, mean (SD) | 72.4 | 71.9 | 73.5 | 72.2 | 72.0 | 71.7 | 73.4 | 71.8 |
|                                                                                                                                                                                                                                                                                                                                                                                                                                                                                                                             | Cohort outcome bleed                                                                                                                                                                                                                                                                                                                                                                                                                                                                                                                                                                                                                                                                                                                                                                                                                                                                                           |      |                      |       | Cohort outcome stroke |      |                       |       |  |  |  |      |     |         |       |      |     |         |       |       |      |      |      |      |      |      |      |      |                |      |      |      |      |      |      |      |      |
|                                                                                                                                                                                                                                                                                                                                                                                                                                                                                                                             | NOAC                                                                                                                                                                                                                                                                                                                                                                                                                                                                                                                                                                                                                                                                                                                                                                                                                                                                                                           | VKA  | Aspirin              | Mixed | NOAC                  | VKA  | Aspirin               | Mixed |  |  |  |      |     |         |       |      |     |         |       |       |      |      |      |      |      |      |      |      |                |      |      |      |      |      |      |      |      |
| Women                                                                                                                                                                                                                                                                                                                                                                                                                                                                                                                       | 45.4                                                                                                                                                                                                                                                                                                                                                                                                                                                                                                                                                                                                                                                                                                                                                                                                                                                                                                           | 46.1 | 49.9                 | 35.9  | 44.4                  | 45.7 | 49.5                  | 35.3  |  |  |  |      |     |         |       |      |     |         |       |       |      |      |      |      |      |      |      |      |                |      |      |      |      |      |      |      |      |
| Age, mean (SD)                                                                                                                                                                                                                                                                                                                                                                                                                                                                                                              | 72.4                                                                                                                                                                                                                                                                                                                                                                                                                                                                                                                                                                                                                                                                                                                                                                                                                                                                                                           | 71.9 | 73.5                 | 72.2  | 72.0                  | 71.7 | 73.4                  | 71.8  |  |  |  |      |     |         |       |      |     |         |       |       |      |      |      |      |      |      |      |      |                |      |      |      |      |      |      |      |      |



|                                                                                                                                                                                                                                       |                                                                                                                                                                                                                                                                                                      |           |           |           |           |           |           |           |
|---------------------------------------------------------------------------------------------------------------------------------------------------------------------------------------------------------------------------------------|------------------------------------------------------------------------------------------------------------------------------------------------------------------------------------------------------------------------------------------------------------------------------------------------------|-----------|-----------|-----------|-----------|-----------|-----------|-----------|
|                                                                                                                                                                                                                                       | (12.6)                                                                                                                                                                                                                                                                                               | (11.9)    | (12.7)    | (10.6)    | (12.8)    | (12.0)    | (12.7)    | (10.5)    |
| 60-69 years                                                                                                                                                                                                                           | 20.2                                                                                                                                                                                                                                                                                                 | 22.3      | 23.1      | 26.4      | 21.0      | 22.4      | 23.2      | 27.4      |
| 70-79 years                                                                                                                                                                                                                           | 32.2                                                                                                                                                                                                                                                                                                 | 34.1      | 27.4      | 36.1      | 31.0      | 33.9      | 27.4      | 35.6      |
| ≥80 years                                                                                                                                                                                                                             | 30.5                                                                                                                                                                                                                                                                                                 | 28.9      | 36.2      | 26.2      | 30.1      | 28.6      | 35.9      | 25.1      |
| <b>CHA<sub>2</sub>DS<sub>2</sub>VASc</b> , mean (SD)                                                                                                                                                                                  | 2.6 (1.5)                                                                                                                                                                                                                                                                                            | 2.6 (1.5) | 2.5 (1.5) | 2.6 (1.4) | 2.4 (1.5) | 2.5 (1.5) | 2.5 (1.4) | 2.5 (1.4) |
| <b>HAS-BLED</b> , mean (SD)                                                                                                                                                                                                           | -                                                                                                                                                                                                                                                                                                    | -         | -         | -         | -         | -         | -         | -         |
| <b>Comorbidities</b>                                                                                                                                                                                                                  |                                                                                                                                                                                                                                                                                                      |           |           |           |           |           |           |           |
| Ischemic stroke, or systemic embolism, or TIA                                                                                                                                                                                         |                                                                                                                                                                                                                                                                                                      |           |           |           |           |           |           |           |
| Congestive heart failure                                                                                                                                                                                                              | 7.2                                                                                                                                                                                                                                                                                                  | 10.1      | 5.8       | 14.9      | 7.5       | 10.4      | 5.8       | 15.7      |
| Myocardial infarction (see below)                                                                                                                                                                                                     | -                                                                                                                                                                                                                                                                                                    | -         | -         | -         | -         | -         | -         | -         |
| Ischemic heart disease                                                                                                                                                                                                                | 8.3                                                                                                                                                                                                                                                                                                  | 10.2      | 9.0       | 25.1      | 7.7       | 10.1      | 8.9       | 26.1      |
| Vascular disease (see below)                                                                                                                                                                                                          | -                                                                                                                                                                                                                                                                                                    | -         | -         | -         | -         | -         | -         | -         |
| Peripheral artery disease                                                                                                                                                                                                             | 5.1                                                                                                                                                                                                                                                                                                  | 5.0       | 3.9       | 5.9       | 5.4       | 5.0       | 4.0       | 6.0       |
| Renal dysfunction (see below)                                                                                                                                                                                                         | -                                                                                                                                                                                                                                                                                                    | -         | -         | -         | -         | -         | -         | -         |
| Chronic renal failure                                                                                                                                                                                                                 | 0.5                                                                                                                                                                                                                                                                                                  | 1.1       | 1.0       | <5        | 0.5       | 1.0       | 1.0       | <5        |
| Acute renal failure                                                                                                                                                                                                                   | 0.6                                                                                                                                                                                                                                                                                                  | 0.5       | 0.7       | <5        | 0.4       | 0.5       | 0.7       | <5        |
| Previous bleeding (see below)                                                                                                                                                                                                         | -                                                                                                                                                                                                                                                                                                    | -         | -         | -         | -         | -         | -         | -         |
| GI bleed                                                                                                                                                                                                                              | <5                                                                                                                                                                                                                                                                                                   | <5        | <5        | <5        | 2.8       | 2.6       | 2.5       | 1.5       |
| Hypertension                                                                                                                                                                                                                          | 54.1                                                                                                                                                                                                                                                                                                 | 53.3      | 49.6      | 5.2       | 53.6      | 53.0      | 49.4      | 51.0      |
| Diabetes                                                                                                                                                                                                                              | -                                                                                                                                                                                                                                                                                                    | -         | -         | -         | -         | -         | -         | -         |
| Cancer                                                                                                                                                                                                                                | 0.9                                                                                                                                                                                                                                                                                                  | 0.9       | 0.7       | 0.9       | 1.3       | 1.0       | 0.8       | 1.0       |
| <b>Concomitant medication</b>                                                                                                                                                                                                         |                                                                                                                                                                                                                                                                                                      |           |           |           |           |           |           |           |
| Aspirin (see below)                                                                                                                                                                                                                   |                                                                                                                                                                                                                                                                                                      |           |           |           |           |           |           |           |
| Antiplatelet drug                                                                                                                                                                                                                     | 0.7                                                                                                                                                                                                                                                                                                  | 1.4       | 0.6       | <5        | 0.4       | 1.0       | 0.4       | <5        |
| Beta-blocker                                                                                                                                                                                                                          | -                                                                                                                                                                                                                                                                                                    | -         | -         | -         | -         | -         | -         | -         |
| NSAID                                                                                                                                                                                                                                 | 11/2                                                                                                                                                                                                                                                                                                 | 11.8      | 13.3      | 13.5      | 10.9      | 12.1      | 13.4      | 13.7      |
| Calcium channel blocker                                                                                                                                                                                                               | -                                                                                                                                                                                                                                                                                                    | -         | -         | -         | -         | -         | -         | -         |
| Renin angiotensin system inhibitor                                                                                                                                                                                                    | -                                                                                                                                                                                                                                                                                                    | -         | -         | -         | -         | -         | -         | -         |
| <b>Analysis</b>                                                                                                                                                                                                                       | <b>Measure of the risk of an end point</b>                                                                                                                                                                                                                                                           |           |           |           |           |           |           |           |
|                                                                                                                                                                                                                                       | Crude incidence rates of outcomes within 1 year per 1000 person-years were calculated                                                                                                                                                                                                                |           |           |           |           |           |           |           |
|                                                                                                                                                                                                                                       | <b>Comparison of the risk of an end point between groups</b>                                                                                                                                                                                                                                         |           |           |           |           |           |           |           |
|                                                                                                                                                                                                                                       | Cox proportional hazards regression analysis estimated the adjusted hazard ratios                                                                                                                                                                                                                    |           |           |           |           |           |           |           |
|                                                                                                                                                                                                                                       | <b>Confounding</b>                                                                                                                                                                                                                                                                                   |           |           |           |           |           |           |           |
|                                                                                                                                                                                                                                       | Potential confounders were included in the final model if they independently changed the beta-coefficient for current use with the outcome of interest by at least 5% or when a consensus about inclusion existed within the team of researchers, supported by clinical evidence from the literature |           |           |           |           |           |           |           |
|                                                                                                                                                                                                                                       | <b>Software for statistical analysis</b>                                                                                                                                                                                                                                                             |           |           |           |           |           |           |           |
|                                                                                                                                                                                                                                       | SAS 9.2 PHREG procedure                                                                                                                                                                                                                                                                              |           |           |           |           |           |           |           |
| AF, atrial fibrillation; GI, gastrointestinal; NOACs, nonvitamin K antagonist oral anticoagulants; NSAIDs, nonsteroidal anti-inflammatory drugs; TIA, transient ischemic attack; SD, standard deviation. VKAs, vitamin K antagonists. |                                                                                                                                                                                                                                                                                                      |           |           |           |           |           |           |           |

|                                                                                                                    |                                                                                                                                                                                                                                                                                                                                                                                                                                                                                                                                                                                                 |
|--------------------------------------------------------------------------------------------------------------------|-------------------------------------------------------------------------------------------------------------------------------------------------------------------------------------------------------------------------------------------------------------------------------------------------------------------------------------------------------------------------------------------------------------------------------------------------------------------------------------------------------------------------------------------------------------------------------------------------|
| <b>Study ID</b>                                                                                                    | Gorst-Rasmussen et al. <sup>12</sup>                                                                                                                                                                                                                                                                                                                                                                                                                                                                                                                                                            |
| <b>Reference</b>                                                                                                   | Gorst-Rasmussen A, Lip GY, Bjerregaard Larsen T. Rivaroxaban versus warfarin and dabigatran in atrial fibrillation: comparative effectiveness and safety in Danish routine care. <i>Pharmacoepidemiol Drug Saf.</i> 2016;25:1236-1244. doi:10.1002/pds.4034                                                                                                                                                                                                                                                                                                                                     |
| <b>Objective</b>                                                                                                   | To evaluate the effectiveness and safety of rivaroxaban vs warfarin or dabigatran etexilate in nonvalvular atrial fibrillation (AF) patients                                                                                                                                                                                                                                                                                                                                                                                                                                                    |
| <b>Country</b>                                                                                                     | Denmark                                                                                                                                                                                                                                                                                                                                                                                                                                                                                                                                                                                         |
| <b>Design</b>                                                                                                      | Nationwide cohort study                                                                                                                                                                                                                                                                                                                                                                                                                                                                                                                                                                         |
| <b>Data source</b>                                                                                                 | Three nationwide Danish registries: <ul style="list-style-type: none"> <li>• The Danish National Prescription Registry (with information on all prescription purchases in Denmark since 1995, coded using Anatomical Therapeutic Chemical classification codes)</li> <li>• The Danish National Patient Register (containing &gt; 99% of all hospital discharge diagnoses in Denmark since 1976, coded according to the International Classification of Diseases [ICD])</li> <li>• The Danish Civil Registration System (containing information on date of birth, sex, and residency)</li> </ul> |
| <b>Time period</b>                                                                                                 | February 2012 to August 2014                                                                                                                                                                                                                                                                                                                                                                                                                                                                                                                                                                    |
| <b>NOAC</b>                                                                                                        | <ul style="list-style-type: none"> <li>• Rivaroxaban 15 mg</li> <li>• Rivaroxaban 20 mg</li> <li>• Dabigatran 110 mg</li> <li>• Dabigatran 150 mg</li> </ul>                                                                                                                                                                                                                                                                                                                                                                                                                                    |
| <b>Control</b>                                                                                                     | Warfarin (any dose)                                                                                                                                                                                                                                                                                                                                                                                                                                                                                                                                                                             |
| <b>Outcomes</b>                                                                                                    | <b>Effectiveness</b> <ul style="list-style-type: none"> <li>• Ischemic stroke/systemic embolism (SE)/transient ischemic attack (TIA)</li> <li>• All-cause death</li> <li>• Myocardial infarction</li> <li>• Venous thromboembolism</li> </ul> <b>Safety</b> <ul style="list-style-type: none"> <li>• Any bleeding</li> <li>• Intracranial bleeding</li> <li>• Gastrointestinal bleeding</li> <li>• Major bleeding events</li> </ul>                                                                                                                                                             |
| <b>Outcome definitions</b>                                                                                         | End points were ascertained according to the International Classification of Disease, 10th revision (ICD-10)                                                                                                                                                                                                                                                                                                                                                                                                                                                                                    |
| <b>Population (eligibility)</b>                                                                                    | <p>Patients with an existing diagnosis of atrial fibrillation with a first-time purchase of the NOAC of interest or warfarin during the study time period</p> <p>Excluded patients who had purchased oral anticoagulants (warfarin, rivaroxaban, dabigatran, or apixaban) within 2 years of baseline</p> <p>Excluded patients for whom either of the following applied: immigrated within 1 year before baseline; prior venous thromboembolism diagnosis; knee or hip surgery within 30 days before baseline; prior valvular surgery; and prior diagnosis of mitral stenosis</p>                |
| <b>Population (study sample)</b>                                                                                   | <b>Study population</b><br>N = 22 358<br>Rivaroxaban, n = 2405 (15 mg, n = 776; 20 mg, n = 1629)<br>Dabigatran, n = 8908 (110 mg, n = 3588; 150 mg, n = 5320)<br>Warfarin, n = 11 045<br><b>Target population</b><br>N = 33 243<br>Excluded: <ul style="list-style-type: none"> <li>• Prior valvular surgery/mitral stenosis, n = 526</li> <li>• Knee or hip surgery &lt; 6 weeks before, n = 179</li> <li>• Prior venous thromboembolism, n = 1594</li> <li>• Anticoagulant purchase &lt; 2 years before, n = 8549</li> <li>• Immigrated &lt; 1 year before, n = 37</li> </ul>                 |
| <b>Population (baseline participant characteristics)</b> (values expressed as percentages unless otherwise stated) |                                                                                                                                                                                                                                                                                                                                                                                                                                                                                                                                                                                                 |
|                                                                                                                    | <div>Rivaroxaban</div> <div>Dabigatran</div> <div>Warfarin</div>                                                                                                                                                                                                                                                                                                                                                                                                                                                                                                                                |

|                                                  | 15 mg                                                                                                                                                                                                                                                                                                                                                                                                                  | 20 mg       | 110 mg      | 150 mg      |             |
|--------------------------------------------------|------------------------------------------------------------------------------------------------------------------------------------------------------------------------------------------------------------------------------------------------------------------------------------------------------------------------------------------------------------------------------------------------------------------------|-------------|-------------|-------------|-------------|
| Women                                            | 59.7                                                                                                                                                                                                                                                                                                                                                                                                                   | 48.9        | 56.8        | 36.5        | 43.0        |
| Age, mean (SD)                                   | 82.8 (8.7)                                                                                                                                                                                                                                                                                                                                                                                                             | 72.8 (9.9)  | 80.8 (8.0)  | 66.0 (8.5)  | 72.6 (11.3) |
| ≥65 years                                        | 96.1 (746)                                                                                                                                                                                                                                                                                                                                                                                                             | 82.0 (1336) | 95.5 (3427) | 62.4 (3319) | 78.3 (8649) |
| ≥75 years                                        | 82.6 (641)                                                                                                                                                                                                                                                                                                                                                                                                             | 39.2 (639)  | 81.4 (2921) | 12.4 (659)  | 45.1 (4984) |
| >85 years                                        | -                                                                                                                                                                                                                                                                                                                                                                                                                      | -           | -           | -           | -           |
| CHA <sub>2</sub> DS <sub>2</sub> VASc, mean (SD) | 2.3 (1.2)                                                                                                                                                                                                                                                                                                                                                                                                              | 1.5 (1.3)   | 2.0 (1.2)   | 1.0 (1.0)   | 1.6 (1.3)   |
| HAS-BLED, mean (SD)                              | 2.8 (1.1)                                                                                                                                                                                                                                                                                                                                                                                                              | 2.3 (1.1)   | 2.6 (1.1)   | 1.9 (1.2)   | 2.4 (1.2)   |
| Standard dose                                    | -                                                                                                                                                                                                                                                                                                                                                                                                                      | 68          | -           | 60          | 100         |
| Reduced dose                                     | 32                                                                                                                                                                                                                                                                                                                                                                                                                     | -           | 40          | -           | -           |
| Comorbidities                                    |                                                                                                                                                                                                                                                                                                                                                                                                                        |             |             |             |             |
| Ischemic stroke, or systemic embolism, or TIA    | -                                                                                                                                                                                                                                                                                                                                                                                                                      | -           | -           | -           | -           |
| Prior stroke                                     | 20.9                                                                                                                                                                                                                                                                                                                                                                                                                   | 18.2        | 16.9        | 9.4         | 12.2        |
| Heart failure                                    | 17.4                                                                                                                                                                                                                                                                                                                                                                                                                   | 5.3         | 8.6         | 3.7         | 9.9         |
| Myocardial infarction                            | -                                                                                                                                                                                                                                                                                                                                                                                                                      | -           | -           | -           | -           |
| Vascular disease                                 | 22.2                                                                                                                                                                                                                                                                                                                                                                                                                   | 12.2        | 18.1        | 9.9         | 20.5        |
| Renal dysfunction                                | -                                                                                                                                                                                                                                                                                                                                                                                                                      | -           | -           | -           | -           |
| Renal disease                                    | 10.1                                                                                                                                                                                                                                                                                                                                                                                                                   | 1.5         | 2.5         | 1.1         | 6.5         |
| Previous bleeding                                | 17.0                                                                                                                                                                                                                                                                                                                                                                                                                   | 14.3        | 16.8        | 10.1        | 14.3        |
| Hypertension                                     | 38.4                                                                                                                                                                                                                                                                                                                                                                                                                   | 35.2        | 36.5        | 27.7        | 35.3        |
| Diabetes                                         | 17.4                                                                                                                                                                                                                                                                                                                                                                                                                   | 13.8        | 14.0        | 12.9        | 16.8        |
| Cancer                                           | -                                                                                                                                                                                                                                                                                                                                                                                                                      | -           | -           | -           | -           |
| Concomitant medication                           |                                                                                                                                                                                                                                                                                                                                                                                                                        |             |             |             |             |
| Aspirin                                          | 55.8                                                                                                                                                                                                                                                                                                                                                                                                                   | 44.0        | 48.9        | 36.1        | 48.1        |
| Beta-blocker                                     | -                                                                                                                                                                                                                                                                                                                                                                                                                      | -           | -           | -           | -           |
| NSAID                                            | 21.5                                                                                                                                                                                                                                                                                                                                                                                                                   | 21.2        | 22.4        | 24.7        | 23.1        |
| Calcium channel blocker                          | -                                                                                                                                                                                                                                                                                                                                                                                                                      | -           | -           | -           | -           |
| Renin angiotensin system inhibitor               | -                                                                                                                                                                                                                                                                                                                                                                                                                      | -           | -           | -           | -           |
| Clopidogrel                                      | 11.5                                                                                                                                                                                                                                                                                                                                                                                                                   | 10.2        | 10.8        | 6.1         | 8.9         |
| Analysis                                         | Measure of the risk of an end point                                                                                                                                                                                                                                                                                                                                                                                    |             |             |             |             |
|                                                  | Crude event rates for all end point and treatment combinations                                                                                                                                                                                                                                                                                                                                                         |             |             |             |             |
|                                                  | Comparison of the risk of an end point between groups                                                                                                                                                                                                                                                                                                                                                                  |             |             |             |             |
|                                                  | Restricted attention to contrasts between clinically meaningful treatment alternatives: R15 vs warfarin, R15 vs D110, R20 vs warfarin, and R20 vs D150                                                                                                                                                                                                                                                                 |             |             |             |             |
|                                                  | Confounding                                                                                                                                                                                                                                                                                                                                                                                                            |             |             |             |             |
|                                                  | Propensity score (PS) methods were subsequently used to control for baseline differences. Each of the 4 contrasts defined a subcohort of patients receiving either rivaroxaban or a comparison treatment. Within each subcohort, we derived a PS for the probability of rivaroxaban therapy using boosted logistic regression models. Standardized mean differences were used to check the balance of treatment groups |             |             |             |             |
|                                                  | Cox proportional hazards models stratified by deciles of the trimmed PS were then used to compare event rates within each subcohort                                                                                                                                                                                                                                                                                    |             |             |             |             |
|                                                  | Sensitivity analysis                                                                                                                                                                                                                                                                                                                                                                                                   |             |             |             |             |
|                                                  | First, the trimmed PS was entered in “standardized mortality reweighted” Cox models estimating the average treatment effect on the treated patients. Secondly, an alternative PS was obtained using the high-dimensional propensity score technique. Cox models were then stratified for the primary end points by deciles of this PS after performing asymmetric trimming, as previously described                    |             |             |             |             |
|                                                  | Finally, the primary analysis was repeated after truncation of follow-up when there was evidence of discontinuation; additionally, patients were censored if they were deemed to have been off treatment for more than 30 days or if they switched treatment                                                                                                                                                           |             |             |             |             |
|                                                  | Software for statistical analysis                                                                                                                                                                                                                                                                                                                                                                                      |             |             |             |             |
|                                                  | R version 3.0.2 with the “twang” add-on                                                                                                                                                                                                                                                                                                                                                                                |             |             |             |             |
|                                                  | Statistical significance reference                                                                                                                                                                                                                                                                                                                                                                                     |             |             |             |             |
|                                                  | A 2-sided <i>P</i> value less than .05 was considered statistically significant                                                                                                                                                                                                                                                                                                                                        |             |             |             |             |

AF, atrial fibrillation; NOACs, nonvitamin K antagonist oral anticoagulants; NSAIDs, nonsteroidal anti-inflammatory drugs; SD, standard deviation; TIA, transient ischemic attack.



|                                                                                                                                |                                                                                                                                                                                                                                                                                                                                                                                                                                                                                                                                                                                                                                                                                                                                                                                                                                                                                                                                                                                                                                                                                                                                                                                                                                                                  |
|--------------------------------------------------------------------------------------------------------------------------------|------------------------------------------------------------------------------------------------------------------------------------------------------------------------------------------------------------------------------------------------------------------------------------------------------------------------------------------------------------------------------------------------------------------------------------------------------------------------------------------------------------------------------------------------------------------------------------------------------------------------------------------------------------------------------------------------------------------------------------------------------------------------------------------------------------------------------------------------------------------------------------------------------------------------------------------------------------------------------------------------------------------------------------------------------------------------------------------------------------------------------------------------------------------------------------------------------------------------------------------------------------------|
| <b>Study ID</b>                                                                                                                | Graham et al. <sup>68</sup>                                                                                                                                                                                                                                                                                                                                                                                                                                                                                                                                                                                                                                                                                                                                                                                                                                                                                                                                                                                                                                                                                                                                                                                                                                      |
| <b>Reference</b>                                                                                                               | Graham DJ, Reichman ME, Wernecke M, Zhang R, Southworth MR, Levenson M. Cardiovascular, bleeding, and mortality risks in elderly Medicare patients treated with dabigatran or warfarin for nonvalvular atrial fibrillation. <i>Circulation</i> . 2015;131:157-164. doi:10.1161/CIRCULATIONAHA.114.012061                                                                                                                                                                                                                                                                                                                                                                                                                                                                                                                                                                                                                                                                                                                                                                                                                                                                                                                                                         |
| <b>Objective</b>                                                                                                               | To evaluate the safety of dabigatran vs warfarin for treatment of nonvalvular atrial fibrillation                                                                                                                                                                                                                                                                                                                                                                                                                                                                                                                                                                                                                                                                                                                                                                                                                                                                                                                                                                                                                                                                                                                                                                |
| <b>Country</b>                                                                                                                 | United States                                                                                                                                                                                                                                                                                                                                                                                                                                                                                                                                                                                                                                                                                                                                                                                                                                                                                                                                                                                                                                                                                                                                                                                                                                                    |
| <b>Design</b>                                                                                                                  | Retrospective cohort study                                                                                                                                                                                                                                                                                                                                                                                                                                                                                                                                                                                                                                                                                                                                                                                                                                                                                                                                                                                                                                                                                                                                                                                                                                       |
| <b>Data source</b>                                                                                                             | Medicare health insurance databases: <ul style="list-style-type: none"> <li>• Medicare Part A (hospitalization)</li> <li>• Medicare Part B (office-based medical care)</li> <li>• Medicare Part D (prescription drugs)</li> </ul>                                                                                                                                                                                                                                                                                                                                                                                                                                                                                                                                                                                                                                                                                                                                                                                                                                                                                                                                                                                                                                |
| <b>Time period</b>                                                                                                             | October 2010 and December 2012                                                                                                                                                                                                                                                                                                                                                                                                                                                                                                                                                                                                                                                                                                                                                                                                                                                                                                                                                                                                                                                                                                                                                                                                                                   |
| <b>NOAC</b>                                                                                                                    | <ul style="list-style-type: none"> <li>• Dabigatran 75 mg twice daily</li> <li>• Dabigatran 150 mg twice daily</li> </ul>                                                                                                                                                                                                                                                                                                                                                                                                                                                                                                                                                                                                                                                                                                                                                                                                                                                                                                                                                                                                                                                                                                                                        |
| <b>Control</b>                                                                                                                 | Warfarin                                                                                                                                                                                                                                                                                                                                                                                                                                                                                                                                                                                                                                                                                                                                                                                                                                                                                                                                                                                                                                                                                                                                                                                                                                                         |
| <b>Outcomes</b>                                                                                                                | <b>Effectiveness</b> <ul style="list-style-type: none"> <li>• Ischemic stroke</li> <li>• Acute myocardial infarction</li> <li>• Death</li> <li>• Intracranial hemorrhage</li> </ul> <b>Safety</b> <ul style="list-style-type: none"> <li>• Major bleeding</li> <li>• Gastrointestinal bleeding</li> </ul>                                                                                                                                                                                                                                                                                                                                                                                                                                                                                                                                                                                                                                                                                                                                                                                                                                                                                                                                                        |
| <b>Outcome definitions</b>                                                                                                     | <p>International Classification of Diseases, Ninth Revision, Clinical Modification codes were used to define these outcomes</p> <p>Major bleeding was defined as a fatal bleeding event, a hospitalized bleeding event requiring transfusion, or hospitalization with hemorrhage into a critical site (ie, intracranial, intraspinal, intraarticular, intraocular, pericardial, retroperitoneal, or intramuscular with compartment syndrome)</p> <p>Intracranial hemorrhage was defined with the use of codes for a traumatic hemorrhage, with a positive predictive value of 89% to 97%, and codes for hemorrhage with closed head trauma, which have not been validated</p>                                                                                                                                                                                                                                                                                                                                                                                                                                                                                                                                                                                    |
| <b>Population (eligibility)</b>                                                                                                | <p>All patients with any inpatient or outpatient diagnoses of AF or atrial flutter based on International Classification of Diseases, Ninth Revision coding who also filled at least 1 prescription for either drug during the study period. Patients discharged from the hospital on the same day as their index dispensation were included</p> <p>Patients were excluded if they had &lt; 6 months of enrollment in Medicare before their index dispensing, were aged &lt; 65 years, received prior treatment with a study medication or rivaroxaban or apixaban (anticoagulants approved during the study), were in a skilled nursing facility or nursing home, or were receiving hospice care on the date of their cohort-qualifying prescription. Patients were also excluded if they had a hospitalization that extended beyond the index dispensing date. Patients undergoing dialysis and kidney transplant recipients were also excluded. Additionally, because warfarin is approved for indications other than AF, patients with diagnoses indicating the presence of mitral valve disease, heart valve repair or replacement, deep vein thrombosis, pulmonary embolism, or joint replacement surgery in the preceding 6 months were also excluded</p> |
| <b>Population (study sample)</b>                                                                                               | <b>Study population</b><br>Dabigatran, N = 67 207<br>Warfarin, N = 67 207<br><b>Target population</b><br>N = 341 414<br>Dabigatran-treated, n = 67 494<br>Warfarin-treated, n = 273 920                                                                                                                                                                                                                                                                                                                                                                                                                                                                                                                                                                                                                                                                                                                                                                                                                                                                                                                                                                                                                                                                          |
| <b>Population (baseline participant characteristics)</b> (values expressed as percentages unless otherwise stated)             |                                                                                                                                                                                                                                                                                                                                                                                                                                                                                                                                                                                                                                                                                                                                                                                                                                                                                                                                                                                                                                                                                                                                                                                                                                                                  |
| <div style="display: flex; justify-content: space-around;"> <span><b>Dabigatran</b></span> <span><b>Warfarin</b></span> </div> |                                                                                                                                                                                                                                                                                                                                                                                                                                                                                                                                                                                                                                                                                                                                                                                                                                                                                                                                                                                                                                                                                                                                                                                                                                                                  |

|                                                                                                                                                             |                                                                                                                                                                                                                                                                                                                                                                                                                                                                                                                                                                                                                                                                                                                                                                                                                                                                                                                                                                                                                                                              |     |
|-------------------------------------------------------------------------------------------------------------------------------------------------------------|--------------------------------------------------------------------------------------------------------------------------------------------------------------------------------------------------------------------------------------------------------------------------------------------------------------------------------------------------------------------------------------------------------------------------------------------------------------------------------------------------------------------------------------------------------------------------------------------------------------------------------------------------------------------------------------------------------------------------------------------------------------------------------------------------------------------------------------------------------------------------------------------------------------------------------------------------------------------------------------------------------------------------------------------------------------|-----|
| <b>Women</b>                                                                                                                                                | 51                                                                                                                                                                                                                                                                                                                                                                                                                                                                                                                                                                                                                                                                                                                                                                                                                                                                                                                                                                                                                                                           | 52  |
| <b>Age, median (IQR)</b>                                                                                                                                    |                                                                                                                                                                                                                                                                                                                                                                                                                                                                                                                                                                                                                                                                                                                                                                                                                                                                                                                                                                                                                                                              |     |
| ≥65-74 years                                                                                                                                                | 42                                                                                                                                                                                                                                                                                                                                                                                                                                                                                                                                                                                                                                                                                                                                                                                                                                                                                                                                                                                                                                                           | 41  |
| ≥75-84 years                                                                                                                                                | 43                                                                                                                                                                                                                                                                                                                                                                                                                                                                                                                                                                                                                                                                                                                                                                                                                                                                                                                                                                                                                                                           | 43  |
| ≥85 years                                                                                                                                                   | 16                                                                                                                                                                                                                                                                                                                                                                                                                                                                                                                                                                                                                                                                                                                                                                                                                                                                                                                                                                                                                                                           | 16  |
| <b>CHA<sub>2</sub>DS<sub>2</sub>VASc</b> (scores greater than 2)                                                                                            | -                                                                                                                                                                                                                                                                                                                                                                                                                                                                                                                                                                                                                                                                                                                                                                                                                                                                                                                                                                                                                                                            | -   |
| <b>HAS-BLED</b> (scores greater than 2)                                                                                                                     | 91                                                                                                                                                                                                                                                                                                                                                                                                                                                                                                                                                                                                                                                                                                                                                                                                                                                                                                                                                                                                                                                           | 91  |
| <b>Standard dose</b>                                                                                                                                        | 85                                                                                                                                                                                                                                                                                                                                                                                                                                                                                                                                                                                                                                                                                                                                                                                                                                                                                                                                                                                                                                                           | 100 |
| <b>Reduced dose</b>                                                                                                                                         | 15                                                                                                                                                                                                                                                                                                                                                                                                                                                                                                                                                                                                                                                                                                                                                                                                                                                                                                                                                                                                                                                           | -   |
| <b>Comorbidities</b>                                                                                                                                        |                                                                                                                                                                                                                                                                                                                                                                                                                                                                                                                                                                                                                                                                                                                                                                                                                                                                                                                                                                                                                                                              |     |
| Ischemic stroke or systemic embolism                                                                                                                        | -                                                                                                                                                                                                                                                                                                                                                                                                                                                                                                                                                                                                                                                                                                                                                                                                                                                                                                                                                                                                                                                            | -   |
| Stroke in past 1-30 d                                                                                                                                       | 2                                                                                                                                                                                                                                                                                                                                                                                                                                                                                                                                                                                                                                                                                                                                                                                                                                                                                                                                                                                                                                                            | 2   |
| Stroke in past 31-183 d                                                                                                                                     | 1                                                                                                                                                                                                                                                                                                                                                                                                                                                                                                                                                                                                                                                                                                                                                                                                                                                                                                                                                                                                                                                            | 2   |
| TIA                                                                                                                                                         | 7                                                                                                                                                                                                                                                                                                                                                                                                                                                                                                                                                                                                                                                                                                                                                                                                                                                                                                                                                                                                                                                            | 7   |
| Heart failure (hospitalized)                                                                                                                                | 4                                                                                                                                                                                                                                                                                                                                                                                                                                                                                                                                                                                                                                                                                                                                                                                                                                                                                                                                                                                                                                                            | 4   |
| Heart failure (not hospitalized)                                                                                                                            | 14                                                                                                                                                                                                                                                                                                                                                                                                                                                                                                                                                                                                                                                                                                                                                                                                                                                                                                                                                                                                                                                           | 14  |
| Acute myocardial infarction in past 1-30 d                                                                                                                  | 1                                                                                                                                                                                                                                                                                                                                                                                                                                                                                                                                                                                                                                                                                                                                                                                                                                                                                                                                                                                                                                                            | 1   |
| Acute myocardial infarction in past 31-183 d                                                                                                                | 1                                                                                                                                                                                                                                                                                                                                                                                                                                                                                                                                                                                                                                                                                                                                                                                                                                                                                                                                                                                                                                                            | 1   |
| Vascular disease                                                                                                                                            | -                                                                                                                                                                                                                                                                                                                                                                                                                                                                                                                                                                                                                                                                                                                                                                                                                                                                                                                                                                                                                                                            | -   |
| Coronary revascularization                                                                                                                                  | 16                                                                                                                                                                                                                                                                                                                                                                                                                                                                                                                                                                                                                                                                                                                                                                                                                                                                                                                                                                                                                                                           | 16  |
| Other cerebrovascular disease                                                                                                                               | 13                                                                                                                                                                                                                                                                                                                                                                                                                                                                                                                                                                                                                                                                                                                                                                                                                                                                                                                                                                                                                                                           | 13  |
| Renal dysfunction                                                                                                                                           | -                                                                                                                                                                                                                                                                                                                                                                                                                                                                                                                                                                                                                                                                                                                                                                                                                                                                                                                                                                                                                                                            | -   |
| Kidney failure (acute)                                                                                                                                      | 5                                                                                                                                                                                                                                                                                                                                                                                                                                                                                                                                                                                                                                                                                                                                                                                                                                                                                                                                                                                                                                                            | 5   |
| Kidney failure (chronic)                                                                                                                                    | 13                                                                                                                                                                                                                                                                                                                                                                                                                                                                                                                                                                                                                                                                                                                                                                                                                                                                                                                                                                                                                                                           | 13  |
| Previous bleeding (hospitalized)                                                                                                                            | 1                                                                                                                                                                                                                                                                                                                                                                                                                                                                                                                                                                                                                                                                                                                                                                                                                                                                                                                                                                                                                                                            | 1   |
| Previous bleeding (not hospitalized)                                                                                                                        | 3                                                                                                                                                                                                                                                                                                                                                                                                                                                                                                                                                                                                                                                                                                                                                                                                                                                                                                                                                                                                                                                            | 3   |
| Hypertension                                                                                                                                                | 87                                                                                                                                                                                                                                                                                                                                                                                                                                                                                                                                                                                                                                                                                                                                                                                                                                                                                                                                                                                                                                                           | 87  |
| Diabetes mellitus                                                                                                                                           | 33                                                                                                                                                                                                                                                                                                                                                                                                                                                                                                                                                                                                                                                                                                                                                                                                                                                                                                                                                                                                                                                           | 34  |
| Cancer                                                                                                                                                      | -                                                                                                                                                                                                                                                                                                                                                                                                                                                                                                                                                                                                                                                                                                                                                                                                                                                                                                                                                                                                                                                            | -   |
| <b>Concomitant medication</b>                                                                                                                               |                                                                                                                                                                                                                                                                                                                                                                                                                                                                                                                                                                                                                                                                                                                                                                                                                                                                                                                                                                                                                                                              |     |
| Aspirin                                                                                                                                                     | -                                                                                                                                                                                                                                                                                                                                                                                                                                                                                                                                                                                                                                                                                                                                                                                                                                                                                                                                                                                                                                                            | -   |
| Beta-blocker                                                                                                                                                | 70                                                                                                                                                                                                                                                                                                                                                                                                                                                                                                                                                                                                                                                                                                                                                                                                                                                                                                                                                                                                                                                           | 71  |
| NSAID                                                                                                                                                       | 15                                                                                                                                                                                                                                                                                                                                                                                                                                                                                                                                                                                                                                                                                                                                                                                                                                                                                                                                                                                                                                                           | 15  |
| Calcium channel blocker                                                                                                                                     | 42                                                                                                                                                                                                                                                                                                                                                                                                                                                                                                                                                                                                                                                                                                                                                                                                                                                                                                                                                                                                                                                           | 42  |
| Renin angiotensin system inhibitor                                                                                                                          | -                                                                                                                                                                                                                                                                                                                                                                                                                                                                                                                                                                                                                                                                                                                                                                                                                                                                                                                                                                                                                                                            | -   |
| <b>Analysis</b>                                                                                                                                             | <b>Measure of the risk of an end point</b><br>Incidence rates were estimated with the use of event counts and exposure follow-up time<br><b>Comparison of the risk of an end point between groups</b><br>Cox proportional hazards regression was used to compare time-to-event in dabigatran vs warfarin (reference) cohorts<br><b>Confounding</b><br>Propensity score matching<br><b>Sensitivity analysis</b><br>(1) Restriction of the analysis to patients with initial prescriptions of ≤ 30 days duration<br>(2) Restriction of the analysis to patients with at least 2 prescription fills of a study drug<br>(3) An increased gap allowance between anticoagulant prescriptions from 3 to 14 days<br><b>Software for statistical analysis</b><br>R version 3.0.2 (R Foundation for Statistical Computing, Vienna, Austria) and SAS 9.2 (SAS Institute Inc, Cary, North Carolina)<br><b>Statistical significance reference</b><br>Statistical significance was determined with 95% confidence intervals and 2-tailed <i>P</i> values ( <i>P</i> ≤ .05) |     |
| IQR, interquartile range; NOACs, nonvitamin K antagonist oral anticoagulants; NSAIDs, nonsteroidal anti-inflammatory drugs; TIA, transient ischemic attack. |                                                                                                                                                                                                                                                                                                                                                                                                                                                                                                                                                                                                                                                                                                                                                                                                                                                                                                                                                                                                                                                              |     |

|                                                                                                                    |                                                                                                                                                                                                                                                                                                                                                                                                                                                                                                                                                                                                                                                                                                                                                                                                                                                                                                                                                                                                                                                                                                                                                                                                                                                              |                    |                         |                    |
|--------------------------------------------------------------------------------------------------------------------|--------------------------------------------------------------------------------------------------------------------------------------------------------------------------------------------------------------------------------------------------------------------------------------------------------------------------------------------------------------------------------------------------------------------------------------------------------------------------------------------------------------------------------------------------------------------------------------------------------------------------------------------------------------------------------------------------------------------------------------------------------------------------------------------------------------------------------------------------------------------------------------------------------------------------------------------------------------------------------------------------------------------------------------------------------------------------------------------------------------------------------------------------------------------------------------------------------------------------------------------------------------|--------------------|-------------------------|--------------------|
| Study ID                                                                                                           | Graham et al. <sup>69</sup>                                                                                                                                                                                                                                                                                                                                                                                                                                                                                                                                                                                                                                                                                                                                                                                                                                                                                                                                                                                                                                                                                                                                                                                                                                  |                    |                         |                    |
| Reference                                                                                                          | Graham DJ, Reichman ME, Wernecke M, Hsueh YH, Izem R, Southworth MR. Stroke, bleeding, and mortality risks in elderly Medicare beneficiaries treated with dabigatran or rivaroxaban for nonvalvular atrial fibrillation. <i>JAMA Intern Med.</i> 2016;176:1662-1671. doi:10.1001/jamainternmed.2016.5954                                                                                                                                                                                                                                                                                                                                                                                                                                                                                                                                                                                                                                                                                                                                                                                                                                                                                                                                                     |                    |                         |                    |
| Objective                                                                                                          | To compare the risks of thromboembolic stroke, intracranial hemorrhage (ICH), major extracranial bleeding including major gastrointestinal bleeding, and mortality in patients with nonvalvular AF who initiated dabigatran or rivaroxaban treatment for stroke prevention                                                                                                                                                                                                                                                                                                                                                                                                                                                                                                                                                                                                                                                                                                                                                                                                                                                                                                                                                                                   |                    |                         |                    |
| Country                                                                                                            | United States                                                                                                                                                                                                                                                                                                                                                                                                                                                                                                                                                                                                                                                                                                                                                                                                                                                                                                                                                                                                                                                                                                                                                                                                                                                |                    |                         |                    |
| Design                                                                                                             | Nationwide cohort study                                                                                                                                                                                                                                                                                                                                                                                                                                                                                                                                                                                                                                                                                                                                                                                                                                                                                                                                                                                                                                                                                                                                                                                                                                      |                    |                         |                    |
| Data source                                                                                                        | Medicare: <ul style="list-style-type: none"><li>• Part A (hospitalization)</li><li>• Part B (outpatient medical care)</li><li>• Part D (prescription drugs)</li></ul>                                                                                                                                                                                                                                                                                                                                                                                                                                                                                                                                                                                                                                                                                                                                                                                                                                                                                                                                                                                                                                                                                        |                    |                         |                    |
| Time period                                                                                                        | November 4, 2011 to June 30, 2014                                                                                                                                                                                                                                                                                                                                                                                                                                                                                                                                                                                                                                                                                                                                                                                                                                                                                                                                                                                                                                                                                                                                                                                                                            |                    |                         |                    |
| NOAC                                                                                                               | Dabigatran 150 mg, twice daily<br>Rivaroxaban 20 mg, once daily                                                                                                                                                                                                                                                                                                                                                                                                                                                                                                                                                                                                                                                                                                                                                                                                                                                                                                                                                                                                                                                                                                                                                                                              |                    |                         |                    |
| Control                                                                                                            | No control with VKAs                                                                                                                                                                                                                                                                                                                                                                                                                                                                                                                                                                                                                                                                                                                                                                                                                                                                                                                                                                                                                                                                                                                                                                                                                                         |                    |                         |                    |
| Outcomes                                                                                                           | <b>Effectiveness</b> <ul style="list-style-type: none"><li>• Thromboembolic stroke</li><li>• ICH</li><li>• Mortality</li><li>• Acute myocardial infarction</li></ul> <b>Safety</b> <ul style="list-style-type: none"><li>• Major extracranial bleeding events</li><li>• Major gastrointestinal bleeding</li><li>• Hospitalized extracranial bleeding events</li></ul>                                                                                                                                                                                                                                                                                                                                                                                                                                                                                                                                                                                                                                                                                                                                                                                                                                                                                        |                    |                         |                    |
| Outcome definitions                                                                                                | Outcomes were defined using previously validated algorithms based on ICD-9 diagnosis codes. These algorithms have reported positive predictive values ranging from 86% to 97%                                                                                                                                                                                                                                                                                                                                                                                                                                                                                                                                                                                                                                                                                                                                                                                                                                                                                                                                                                                                                                                                                |                    |                         |                    |
| Population (eligibility)                                                                                           | New users with nonvalvular AF who were 65 years or older, enrolled in fee-for-service Medicare, and who initiated treatment with dabigatran or rivaroxaban during the study period<br><br>Patients enrolled in Medicare Advantage (Part C), which provides care through private insurance companies, were not included because claims for medical encounters and hospitalizations were not reliably captured by Medicare during the study period<br><br>Patients were excluded if they had less than 6 months of enrollment in Medicare Parts A, B, and D, were younger than 65 years, had received prior treatment with warfarin or any NOAC, resided in a skilled nursing facility or nursing home, or were receiving hospice care on the date of their cohort-qualifying prescription (index date). Patients with a hospitalization extending beyond the index date were also excluded, as were kidney transplant recipients and patients undergoing dialysis. Additionally, patients with diagnoses indicating a potential alternative indication for anticoagulation in the 6 months preceding study entry (mitral valve disease, heart valve repair or replacement, deep vein thrombosis, pulmonary embolism, or joint replacement) were also excluded |                    |                         |                    |
| Population (study sample)                                                                                          | <b>Study population</b><br>15 524 and 20 199 person-years of on-treatment follow-up<br>Dabigatran, n = 52 240<br>Rivaroxaban, n = 66 651                                                                                                                                                                                                                                                                                                                                                                                                                                                                                                                                                                                                                                                                                                                                                                                                                                                                                                                                                                                                                                                                                                                     |                    |                         |                    |
| <b>Population (baseline participant characteristics)</b> (values expressed as percentages unless otherwise stated) |                                                                                                                                                                                                                                                                                                                                                                                                                                                                                                                                                                                                                                                                                                                                                                                                                                                                                                                                                                                                                                                                                                                                                                                                                                                              |                    |                         |                    |
|                                                                                                                    | <b>Unweighted cohorts</b>                                                                                                                                                                                                                                                                                                                                                                                                                                                                                                                                                                                                                                                                                                                                                                                                                                                                                                                                                                                                                                                                                                                                                                                                                                    |                    | <b>Weighted cohorts</b> |                    |
|                                                                                                                    | <b>Dabigatran</b>                                                                                                                                                                                                                                                                                                                                                                                                                                                                                                                                                                                                                                                                                                                                                                                                                                                                                                                                                                                                                                                                                                                                                                                                                                            | <b>Rivaroxaban</b> | <b>Dabigatran</b>       | <b>Rivaroxaban</b> |
| <b>Women</b>                                                                                                       | 47                                                                                                                                                                                                                                                                                                                                                                                                                                                                                                                                                                                                                                                                                                                                                                                                                                                                                                                                                                                                                                                                                                                                                                                                                                                           | 47                 | 47                      | 47                 |
| <b>Age</b>                                                                                                         |                                                                                                                                                                                                                                                                                                                                                                                                                                                                                                                                                                                                                                                                                                                                                                                                                                                                                                                                                                                                                                                                                                                                                                                                                                                              |                    |                         |                    |
| 65-74 years                                                                                                        | 50                                                                                                                                                                                                                                                                                                                                                                                                                                                                                                                                                                                                                                                                                                                                                                                                                                                                                                                                                                                                                                                                                                                                                                                                                                                           | 51                 | 50                      | 50                 |
| 75-84 years                                                                                                        | 40                                                                                                                                                                                                                                                                                                                                                                                                                                                                                                                                                                                                                                                                                                                                                                                                                                                                                                                                                                                                                                                                                                                                                                                                                                                           | 40                 | 40                      | 40                 |
| ≥85 years                                                                                                          | 10                                                                                                                                                                                                                                                                                                                                                                                                                                                                                                                                                                                                                                                                                                                                                                                                                                                                                                                                                                                                                                                                                                                                                                                                                                                           | 9                  | 47                      | 47                 |
| <b>CHA<sub>2</sub>DS<sub>2</sub>VASc</b>                                                                           |                                                                                                                                                                                                                                                                                                                                                                                                                                                                                                                                                                                                                                                                                                                                                                                                                                                                                                                                                                                                                                                                                                                                                                                                                                                              |                    |                         |                    |
| <b>HAS-BLED</b>                                                                                                    |                                                                                                                                                                                                                                                                                                                                                                                                                                                                                                                                                                                                                                                                                                                                                                                                                                                                                                                                                                                                                                                                                                                                                                                                                                                              |                    |                         |                    |

55

|                                                                            |     |     |     |     |
|----------------------------------------------------------------------------|-----|-----|-----|-----|
| <b>Standard dose</b>                                                       | 100 | 100 | 100 | 100 |
| <b>Reduced dose</b>                                                        | -   | -   | -   | -   |
| <b>Comorbidities</b>                                                       |     |     |     |     |
| Ischemic stroke, or systemic embolism, or TIA (see below)                  | -   | -   | -   | -   |
| Transient ischemic attack                                                  | 6   | 6   | 6   | 6   |
| Stroke in past 1-30 d                                                      | 2   | 2   | 2   | 2   |
| Stroke in past 31-180 d                                                    | 1   | 1   | 1   | 1   |
| Heart failure                                                              |     |     |     |     |
| Hospitalized                                                               | 3   | 3   | 3   | 3   |
| Outpatient                                                                 | 13  | 11  | 12  | 12  |
| Acute myocardial infarction in past 1-30 d                                 | 1   | 1   | 1   | 1   |
| Acute myocardial infarction in past 31-183 d                               | 1   | 1   | 1   | 1   |
| Vascular disease (see below)                                               |     |     |     |     |
| Coronary revascularization                                                 | 14  | 15  | 15  | 15  |
| Cardioablation                                                             | 2   | 2   | 2   | 2   |
| Cardioversion                                                              | 9   | 9   | 9   | 9   |
| Renal dysfunction                                                          |     |     |     |     |
| Acute                                                                      | 3   | 3   | 3   | 3   |
| Chronic                                                                    | 10  | 8   | 9   | 9   |
| Previous bleeding                                                          | <1  | <1  | <1  | <1  |
| Hypertension                                                               | 86  | 86  | 86  | 86  |
| Diabetes                                                                   | 34  | 32  | 33  | 33  |
| Cancer                                                                     | -   | -   | -   | -   |
| <b>Concomitant medication</b>                                              |     |     |     |     |
| Aspirin (see below)                                                        | -   | -   | -   | -   |
| antiplatelet                                                               | 13  | 15  | 14  | 14  |
| Beta-blocker                                                               | 70  | 71  | 71  | 71  |
| NSAID                                                                      | 14  | 14  | 14  | 14  |
| Calcium channel blocker                                                    | 42  | 42  | 42  | 42  |
| Renin angiotensin system inhibitor                                         | -   | -   | -   | -   |
| Estrogen therapy                                                           | 2   | 2   | 2   | 2   |
| Histamine H2 antagonist                                                    | 5   | 5   | 5   | 5   |
| Proton pump inhibitor                                                      | 26  | 27  | 27  | 27  |
| Selective serotonin reuptake inhibitor                                     | 13  | 12  | 13  | 13  |
| antidepressant                                                             |     |     |     |     |
| Angiotensin-converting enzyme inhibitor or angiotensin II receptor blocker | 59  | 58  | 59  | 58  |
| Antiarrhythmic                                                             | 25  | 25  | 25  | 25  |
| Anticoagulant (injectable)                                                 | 7   | 9   | 8   | 8   |
| Digoxin                                                                    | 14  | 12  | 13  | 13  |
| Diuretic                                                                   |     |     |     |     |
| Loop                                                                       | 25  | 22  | 23  | 23  |
| Potassium-                                                                 | 8   | 8   | 8   | 8   |



|                                                                                                                                                               |                                                                                                                                                                                                                                                                                                                                                                                                                                                                                                                                                                                                                                                                                                                                                                                                                                                                                                                                                                                                                                                                                                                                                                                                                                                                                                                                                                                                                                                                                                                                                                                                                                                                                                                                                                                                                                                                                                                                                                                                                                                                                                                                                                                                                                                                                                                                                                                                                                                                                                                                                                                                                                                                                             |    |    |    |
|---------------------------------------------------------------------------------------------------------------------------------------------------------------|---------------------------------------------------------------------------------------------------------------------------------------------------------------------------------------------------------------------------------------------------------------------------------------------------------------------------------------------------------------------------------------------------------------------------------------------------------------------------------------------------------------------------------------------------------------------------------------------------------------------------------------------------------------------------------------------------------------------------------------------------------------------------------------------------------------------------------------------------------------------------------------------------------------------------------------------------------------------------------------------------------------------------------------------------------------------------------------------------------------------------------------------------------------------------------------------------------------------------------------------------------------------------------------------------------------------------------------------------------------------------------------------------------------------------------------------------------------------------------------------------------------------------------------------------------------------------------------------------------------------------------------------------------------------------------------------------------------------------------------------------------------------------------------------------------------------------------------------------------------------------------------------------------------------------------------------------------------------------------------------------------------------------------------------------------------------------------------------------------------------------------------------------------------------------------------------------------------------------------------------------------------------------------------------------------------------------------------------------------------------------------------------------------------------------------------------------------------------------------------------------------------------------------------------------------------------------------------------------------------------------------------------------------------------------------------------|----|----|----|
| sparing                                                                                                                                                       |                                                                                                                                                                                                                                                                                                                                                                                                                                                                                                                                                                                                                                                                                                                                                                                                                                                                                                                                                                                                                                                                                                                                                                                                                                                                                                                                                                                                                                                                                                                                                                                                                                                                                                                                                                                                                                                                                                                                                                                                                                                                                                                                                                                                                                                                                                                                                                                                                                                                                                                                                                                                                                                                                             |    |    |    |
| Thiazide                                                                                                                                                      | 30                                                                                                                                                                                                                                                                                                                                                                                                                                                                                                                                                                                                                                                                                                                                                                                                                                                                                                                                                                                                                                                                                                                                                                                                                                                                                                                                                                                                                                                                                                                                                                                                                                                                                                                                                                                                                                                                                                                                                                                                                                                                                                                                                                                                                                                                                                                                                                                                                                                                                                                                                                                                                                                                                          | 30 | 30 | 30 |
| Nitrate                                                                                                                                                       | 9                                                                                                                                                                                                                                                                                                                                                                                                                                                                                                                                                                                                                                                                                                                                                                                                                                                                                                                                                                                                                                                                                                                                                                                                                                                                                                                                                                                                                                                                                                                                                                                                                                                                                                                                                                                                                                                                                                                                                                                                                                                                                                                                                                                                                                                                                                                                                                                                                                                                                                                                                                                                                                                                                           | 9  | 9  | 9  |
| Statin                                                                                                                                                        | 58                                                                                                                                                                                                                                                                                                                                                                                                                                                                                                                                                                                                                                                                                                                                                                                                                                                                                                                                                                                                                                                                                                                                                                                                                                                                                                                                                                                                                                                                                                                                                                                                                                                                                                                                                                                                                                                                                                                                                                                                                                                                                                                                                                                                                                                                                                                                                                                                                                                                                                                                                                                                                                                                                          | 57 | 57 | 57 |
| Fibrate                                                                                                                                                       | 5                                                                                                                                                                                                                                                                                                                                                                                                                                                                                                                                                                                                                                                                                                                                                                                                                                                                                                                                                                                                                                                                                                                                                                                                                                                                                                                                                                                                                                                                                                                                                                                                                                                                                                                                                                                                                                                                                                                                                                                                                                                                                                                                                                                                                                                                                                                                                                                                                                                                                                                                                                                                                                                                                           | 4  | 4  | 4  |
| Diabetes related                                                                                                                                              |                                                                                                                                                                                                                                                                                                                                                                                                                                                                                                                                                                                                                                                                                                                                                                                                                                                                                                                                                                                                                                                                                                                                                                                                                                                                                                                                                                                                                                                                                                                                                                                                                                                                                                                                                                                                                                                                                                                                                                                                                                                                                                                                                                                                                                                                                                                                                                                                                                                                                                                                                                                                                                                                                             |    |    |    |
| Insulin                                                                                                                                                       | 6                                                                                                                                                                                                                                                                                                                                                                                                                                                                                                                                                                                                                                                                                                                                                                                                                                                                                                                                                                                                                                                                                                                                                                                                                                                                                                                                                                                                                                                                                                                                                                                                                                                                                                                                                                                                                                                                                                                                                                                                                                                                                                                                                                                                                                                                                                                                                                                                                                                                                                                                                                                                                                                                                           | 6  | 6  | 6  |
| Metformin                                                                                                                                                     | 15                                                                                                                                                                                                                                                                                                                                                                                                                                                                                                                                                                                                                                                                                                                                                                                                                                                                                                                                                                                                                                                                                                                                                                                                                                                                                                                                                                                                                                                                                                                                                                                                                                                                                                                                                                                                                                                                                                                                                                                                                                                                                                                                                                                                                                                                                                                                                                                                                                                                                                                                                                                                                                                                                          | 15 | 15 | 15 |
| Sulfonylurea                                                                                                                                                  | 9                                                                                                                                                                                                                                                                                                                                                                                                                                                                                                                                                                                                                                                                                                                                                                                                                                                                                                                                                                                                                                                                                                                                                                                                                                                                                                                                                                                                                                                                                                                                                                                                                                                                                                                                                                                                                                                                                                                                                                                                                                                                                                                                                                                                                                                                                                                                                                                                                                                                                                                                                                                                                                                                                           | 8  | 9  | 9  |
| Other                                                                                                                                                         | 6                                                                                                                                                                                                                                                                                                                                                                                                                                                                                                                                                                                                                                                                                                                                                                                                                                                                                                                                                                                                                                                                                                                                                                                                                                                                                                                                                                                                                                                                                                                                                                                                                                                                                                                                                                                                                                                                                                                                                                                                                                                                                                                                                                                                                                                                                                                                                                                                                                                                                                                                                                                                                                                                                           | 6  | 6  | 6  |
| Metabolic inhibitor                                                                                                                                           |                                                                                                                                                                                                                                                                                                                                                                                                                                                                                                                                                                                                                                                                                                                                                                                                                                                                                                                                                                                                                                                                                                                                                                                                                                                                                                                                                                                                                                                                                                                                                                                                                                                                                                                                                                                                                                                                                                                                                                                                                                                                                                                                                                                                                                                                                                                                                                                                                                                                                                                                                                                                                                                                                             |    |    |    |
| Amiodarone                                                                                                                                                    | 9                                                                                                                                                                                                                                                                                                                                                                                                                                                                                                                                                                                                                                                                                                                                                                                                                                                                                                                                                                                                                                                                                                                                                                                                                                                                                                                                                                                                                                                                                                                                                                                                                                                                                                                                                                                                                                                                                                                                                                                                                                                                                                                                                                                                                                                                                                                                                                                                                                                                                                                                                                                                                                                                                           | 10 | 9  | 9  |
| Dronedarone                                                                                                                                                   | 4                                                                                                                                                                                                                                                                                                                                                                                                                                                                                                                                                                                                                                                                                                                                                                                                                                                                                                                                                                                                                                                                                                                                                                                                                                                                                                                                                                                                                                                                                                                                                                                                                                                                                                                                                                                                                                                                                                                                                                                                                                                                                                                                                                                                                                                                                                                                                                                                                                                                                                                                                                                                                                                                                           | 4  | 4  | 4  |
| Azole                                                                                                                                                         | <1                                                                                                                                                                                                                                                                                                                                                                                                                                                                                                                                                                                                                                                                                                                                                                                                                                                                                                                                                                                                                                                                                                                                                                                                                                                                                                                                                                                                                                                                                                                                                                                                                                                                                                                                                                                                                                                                                                                                                                                                                                                                                                                                                                                                                                                                                                                                                                                                                                                                                                                                                                                                                                                                                          | <1 | <1 | <1 |
| antifungal                                                                                                                                                    |                                                                                                                                                                                                                                                                                                                                                                                                                                                                                                                                                                                                                                                                                                                                                                                                                                                                                                                                                                                                                                                                                                                                                                                                                                                                                                                                                                                                                                                                                                                                                                                                                                                                                                                                                                                                                                                                                                                                                                                                                                                                                                                                                                                                                                                                                                                                                                                                                                                                                                                                                                                                                                                                                             |    |    |    |
| Prescriber speciality                                                                                                                                         |                                                                                                                                                                                                                                                                                                                                                                                                                                                                                                                                                                                                                                                                                                                                                                                                                                                                                                                                                                                                                                                                                                                                                                                                                                                                                                                                                                                                                                                                                                                                                                                                                                                                                                                                                                                                                                                                                                                                                                                                                                                                                                                                                                                                                                                                                                                                                                                                                                                                                                                                                                                                                                                                                             |    |    |    |
| Cardiology                                                                                                                                                    | 54                                                                                                                                                                                                                                                                                                                                                                                                                                                                                                                                                                                                                                                                                                                                                                                                                                                                                                                                                                                                                                                                                                                                                                                                                                                                                                                                                                                                                                                                                                                                                                                                                                                                                                                                                                                                                                                                                                                                                                                                                                                                                                                                                                                                                                                                                                                                                                                                                                                                                                                                                                                                                                                                                          | 60 | 57 | 57 |
| Family                                                                                                                                                        | 12                                                                                                                                                                                                                                                                                                                                                                                                                                                                                                                                                                                                                                                                                                                                                                                                                                                                                                                                                                                                                                                                                                                                                                                                                                                                                                                                                                                                                                                                                                                                                                                                                                                                                                                                                                                                                                                                                                                                                                                                                                                                                                                                                                                                                                                                                                                                                                                                                                                                                                                                                                                                                                                                                          | 8  | 10 | 10 |
| medicine                                                                                                                                                      |                                                                                                                                                                                                                                                                                                                                                                                                                                                                                                                                                                                                                                                                                                                                                                                                                                                                                                                                                                                                                                                                                                                                                                                                                                                                                                                                                                                                                                                                                                                                                                                                                                                                                                                                                                                                                                                                                                                                                                                                                                                                                                                                                                                                                                                                                                                                                                                                                                                                                                                                                                                                                                                                                             |    |    |    |
| Internal                                                                                                                                                      | 21                                                                                                                                                                                                                                                                                                                                                                                                                                                                                                                                                                                                                                                                                                                                                                                                                                                                                                                                                                                                                                                                                                                                                                                                                                                                                                                                                                                                                                                                                                                                                                                                                                                                                                                                                                                                                                                                                                                                                                                                                                                                                                                                                                                                                                                                                                                                                                                                                                                                                                                                                                                                                                                                                          | 19 | 20 | 20 |
| medicine                                                                                                                                                      |                                                                                                                                                                                                                                                                                                                                                                                                                                                                                                                                                                                                                                                                                                                                                                                                                                                                                                                                                                                                                                                                                                                                                                                                                                                                                                                                                                                                                                                                                                                                                                                                                                                                                                                                                                                                                                                                                                                                                                                                                                                                                                                                                                                                                                                                                                                                                                                                                                                                                                                                                                                                                                                                                             |    |    |    |
| Other                                                                                                                                                         | 13                                                                                                                                                                                                                                                                                                                                                                                                                                                                                                                                                                                                                                                                                                                                                                                                                                                                                                                                                                                                                                                                                                                                                                                                                                                                                                                                                                                                                                                                                                                                                                                                                                                                                                                                                                                                                                                                                                                                                                                                                                                                                                                                                                                                                                                                                                                                                                                                                                                                                                                                                                                                                                                                                          | 13 | 13 | 13 |
| Analysis                                                                                                                                                      | <p><b>Measure of the risk of an end point</b></p> <p>Adjusted hazard ratios (HRs) for the primary outcomes. Adjusted incidence rate differences (AIRDs) were also estimated. All analyses were based on IPTW-adjusted cohorts and therefore accounted for potential confounding by baseline factors</p> <p>Weighted Kaplan-Meier cumulative incidence plots were generated to characterize risk over time</p> <p><b>Comparison of the risk of an end point between groups</b></p> <p>Weighted Cox proportional hazards regression with robust estimation was used to estimate the time-to-event in rivaroxaban vs dabigatran (reference) cohorts. Adjusted incidence rate differences were estimated using weighted event counts and follow-up time within cohorts</p> <p><b>Confounding</b></p> <p>To adjust for potential confounding, inverse probability of treatment weighting (IPTW) based on the propensity score was used. The propensity score (predicted probability of initiating dabigatran treatment given baseline characteristics) was used to generate patient-specific stabilized weights that control for covariate imbalances. Covariate balance between the weighted cohorts was assessed using standardized mean differences. A standardized difference of 0.1 or less indicates a negligible difference between groups. The distributions of propensity scores and stabilized weights were inspected for outliers</p> <p><b>Sensitivity analysis</b></p> <p>A number of sensitivity analyses were performed. To assess whether the main analyses were affected by a misclassification of exposure time, analyses were restricted to patients with at least 2 prescription fills of a study drug and the gap allowance between anticoagulant prescriptions was increased from 3 to 14 days. The main analysis was repeated using multivariable Cox regression, which included all covariates used in the weighted analysis. In post hoc sensitivity analyses, the CHA<sub>2</sub>DS<sub>2</sub>-VASc was substituted for the CHADS<sub>2</sub> score; censoring was no longer performed for initiation of dialysis or kidney transplantation, or admission to a nursing home, skilled nursing facility, or hospice; and the competing risks of death were adjusted for using the subdistribution of hazards approach</p> <p><b>Software for statistical analysis</b></p> <p>R version 3.2.0 (R Foundation for Statistical Computing, Vienna, Austria) and SAS 9.4 (SAS Institute Inc)</p> <p><b>Statistical significance reference</b></p> <p>Statistical significance was determined using 95% confidence intervals and 2-tailed <i>P</i> values (<i>P</i> ≤ .05)</p> |    |    |    |
| NOACs, nonvitamin K antagonist oral anticoagulants; NSAIDs, nonsteroidal anti-inflammatory drugs; TIA, transient ischemic attack; VKAs, vitamin K antagonists |                                                                                                                                                                                                                                                                                                                                                                                                                                                                                                                                                                                                                                                                                                                                                                                                                                                                                                                                                                                                                                                                                                                                                                                                                                                                                                                                                                                                                                                                                                                                                                                                                                                                                                                                                                                                                                                                                                                                                                                                                                                                                                                                                                                                                                                                                                                                                                                                                                                                                                                                                                                                                                                                                             |    |    |    |



|                                  |                                                                                                                                                                                                                                                                                                                                                                                                                                                                                                                                                                                                                                                                                                                                                                                                                                                                                                                                                                          |
|----------------------------------|--------------------------------------------------------------------------------------------------------------------------------------------------------------------------------------------------------------------------------------------------------------------------------------------------------------------------------------------------------------------------------------------------------------------------------------------------------------------------------------------------------------------------------------------------------------------------------------------------------------------------------------------------------------------------------------------------------------------------------------------------------------------------------------------------------------------------------------------------------------------------------------------------------------------------------------------------------------------------|
| <b>Study ID</b>                  | Halvorsen et al. <sup>70</sup>                                                                                                                                                                                                                                                                                                                                                                                                                                                                                                                                                                                                                                                                                                                                                                                                                                                                                                                                           |
| <b>Reference</b>                 | Halvorsen S, Ghanima W, Fride Tvete I, Hoxmark C, Falck P, Solli O, Jonasson C. A nationwide registry study to compare bleeding rates in patients with atrial fibrillation being prescribed oral anticoagulants. <i>Eur Heart J Cardiovasc Pharmacother.</i> 2017;3:28-36. doi:10.1093/ehjcvp/pvw031                                                                                                                                                                                                                                                                                                                                                                                                                                                                                                                                                                                                                                                                     |
| <b>Objective</b>                 | To evaluate bleeding risk in clinical practice in patients with atrial fibrillation (AF) being prescribed dabigatran, rivaroxaban, or apixaban vs warfarin                                                                                                                                                                                                                                                                                                                                                                                                                                                                                                                                                                                                                                                                                                                                                                                                               |
| <b>Country</b>                   | Norway                                                                                                                                                                                                                                                                                                                                                                                                                                                                                                                                                                                                                                                                                                                                                                                                                                                                                                                                                                   |
| <b>Design</b>                    | Nationwide cohort study                                                                                                                                                                                                                                                                                                                                                                                                                                                                                                                                                                                                                                                                                                                                                                                                                                                                                                                                                  |
| <b>Data source</b>               | Two nationwide registries: <ul style="list-style-type: none"> <li>• The Norwegian Patient Registry (NPR), which includes emergency visits, hospitalizations, outpatient consultations, length of stay, and surgical and medical procedures</li> <li>• The Norwegian Prescription Database (NorPD), which covers all prescriptions dispensed at pharmacies nationwide, information on date of dispensation, quantity, and strength dispensed and the time of all-cause death</li> </ul>                                                                                                                                                                                                                                                                                                                                                                                                                                                                                   |
| <b>Time period</b>               | January 1, 2013 to June 30, 2015                                                                                                                                                                                                                                                                                                                                                                                                                                                                                                                                                                                                                                                                                                                                                                                                                                                                                                                                         |
| <b>NOAC</b>                      | <ul style="list-style-type: none"> <li>• Apixaban twice daily</li> <li>• Dabigatran twice daily</li> <li>• Rivaroxaban once daily</li> </ul>                                                                                                                                                                                                                                                                                                                                                                                                                                                                                                                                                                                                                                                                                                                                                                                                                             |
| <b>Control</b>                   | Warfarin                                                                                                                                                                                                                                                                                                                                                                                                                                                                                                                                                                                                                                                                                                                                                                                                                                                                                                                                                                 |
| <b>Outcomes</b>                  | <b>Safety</b> <ul style="list-style-type: none"> <li>• Major bleeding</li> <li>• Clinically relevant nonmajor (CRNM) bleeding</li> <li>• Gastrointestinal bleeding (GI)</li> <li>• Intracranial bleeding (ICH)</li> <li>• Other site bleeding</li> </ul>                                                                                                                                                                                                                                                                                                                                                                                                                                                                                                                                                                                                                                                                                                                 |
| <b>Outcome definitions</b>       | <p>Bleeding was defined as all bleeding events recorded in the NPR between the index date and 30 days after the calculated end of OAC supply</p> <p>Major bleeding was defined as any bleeding event that occurred in a critical area or organ or any bleeding event that was accompanied by blood transfusion <math>\leq 10</math> days after the hospital admission date</p> <p>CRNM bleeding was defined in accordance with the ISTH classification as any bleeding requiring medical intervention by a health care professional, leading to hospitalization or increased level of care or prompting a face-to-face evaluation, that did not fit the criteria for major bleeding</p> <p>The bleeding events were also categorized by organ system into GI, ICH, or bleeding from other sites. Bleeding end points took into account all bleeds with the prespecified ICD-10 codes and were not restricted to admissions with bleeding as the primary (first) code</p> |
| <b>Population (eligibility)</b>  | <p>The study included all patients <math>\geq 18</math> years diagnosed with nonvalvular AF with at least 1 warfarin or NOAC dispensation in the study period but who were anticoagulant-naïve before the start of the study</p> <p>Patients with venous thromboembolism during the last 180 days and those who had knee or hip replacement surgery during the last 35 days before OAC initiation were excluded</p>                                                                                                                                                                                                                                                                                                                                                                                                                                                                                                                                                      |
| <b>Population (study sample)</b> | <b>Study population</b><br>N = 32 675 patients starting treatment with an OAC<br>Dabigatran, n = 7925<br>Rivaroxaban, n = 6817<br>Apixaban, n = 6506<br>Warfarin, n = 11 427<br><b>Target population</b><br>N = 68 215<br>Excluded: <ul style="list-style-type: none"> <li>• Patients <math>&lt; 18</math> years, n = 4</li> <li>• Patients with any OAC dispensation in the 180 days prior to the index date, n = 34 066</li> <li>• Patients with VTE in the 180 days prior to the index date, n = 912</li> <li>• Patients with knee/hip surgery in the 35 days prior to the index date, n = 336</li> <li>• Patients with 2 different OACs dispensed at the index date, n = 6</li> <li>• Patients dispensed OAC tablet strengths not indicated for AF at the index date, n = 216</li> </ul>                                                                                                                                                                             |

| Population (baseline participant characteristics) (values expressed as percentages unless otherwise stated)                                               |                                                                                                                                                                                                                                                                                                                                                                                                       |             |             |             |
|-----------------------------------------------------------------------------------------------------------------------------------------------------------|-------------------------------------------------------------------------------------------------------------------------------------------------------------------------------------------------------------------------------------------------------------------------------------------------------------------------------------------------------------------------------------------------------|-------------|-------------|-------------|
|                                                                                                                                                           | Warfarin                                                                                                                                                                                                                                                                                                                                                                                              | Dabigatran  | Rivaroxaban | Apixaban    |
| Women                                                                                                                                                     | 41                                                                                                                                                                                                                                                                                                                                                                                                    | 38          | 45.6        | 45          |
| Age, mean (SD)                                                                                                                                            | 74.6 (11.9)                                                                                                                                                                                                                                                                                                                                                                                           | 70.8 (11.3) | 74.7 (10.7) | 74.5 (11.1) |
| >65 years                                                                                                                                                 | -                                                                                                                                                                                                                                                                                                                                                                                                     | -           | -           | -           |
| ≥75 years                                                                                                                                                 | 6248 (54.7)                                                                                                                                                                                                                                                                                                                                                                                           | 2967 (37.4) | 3524 (51.7) | 3295 (50.6) |
| >85 years                                                                                                                                                 | -                                                                                                                                                                                                                                                                                                                                                                                                     | -           | -           | -           |
| CHA <sub>2</sub> DS <sub>2</sub> VASc, mean (SD)                                                                                                          |                                                                                                                                                                                                                                                                                                                                                                                                       |             |             |             |
| HAS-BLED, mean (SD)                                                                                                                                       | 42.8                                                                                                                                                                                                                                                                                                                                                                                                  | 37.0        | 47.0        | 46.6        |
| Standard dose                                                                                                                                             |                                                                                                                                                                                                                                                                                                                                                                                                       |             |             |             |
| Reduced dose                                                                                                                                              |                                                                                                                                                                                                                                                                                                                                                                                                       |             |             |             |
| Comorbidities                                                                                                                                             |                                                                                                                                                                                                                                                                                                                                                                                                       |             |             |             |
| Ischemic stroke, or systemic embolism, or TIA (see below)                                                                                                 | -                                                                                                                                                                                                                                                                                                                                                                                                     | -           | -           | -           |
| Stroke, TIA, and thromboembolism                                                                                                                          | 11.6                                                                                                                                                                                                                                                                                                                                                                                                  | 9.4         | 16.1        | 13.9        |
| Chronic heart failure                                                                                                                                     | 29.0                                                                                                                                                                                                                                                                                                                                                                                                  | 15.8        | 20.4        | 20.6        |
| Myocardial infarction (see below)                                                                                                                         | -                                                                                                                                                                                                                                                                                                                                                                                                     | -           | -           | -           |
| Ischemic heart disease                                                                                                                                    | 35.9                                                                                                                                                                                                                                                                                                                                                                                                  | 21.4        | 25.5        | 27.6        |
| Vascular disease (see below)                                                                                                                              | -                                                                                                                                                                                                                                                                                                                                                                                                     | -           | -           | -           |
| Anemia (last year)                                                                                                                                        | 4.8                                                                                                                                                                                                                                                                                                                                                                                                   | 2.0         | 3.0         | 3.1         |
| Renal dysfunction (see below)                                                                                                                             | -                                                                                                                                                                                                                                                                                                                                                                                                     | -           | -           | -           |
| Chronic kidney disease                                                                                                                                    | 5.0                                                                                                                                                                                                                                                                                                                                                                                                   | 0.73        | 2.0         | 2.5         |
| Previous bleeding (see below)                                                                                                                             | -                                                                                                                                                                                                                                                                                                                                                                                                     | -           | -           | -           |
| Previous bleeding hospitalization                                                                                                                         | 16.8                                                                                                                                                                                                                                                                                                                                                                                                  | 11.2        | 14.8        | 15.1        |
| Hypertension                                                                                                                                              | 67.0                                                                                                                                                                                                                                                                                                                                                                                                  | 59.0        | 66.0        | 65.4        |
| Diabetes                                                                                                                                                  | 14.7                                                                                                                                                                                                                                                                                                                                                                                                  | 10.4        | 11.7        | 12.3        |
| Active cancer (last year)                                                                                                                                 | 10.0                                                                                                                                                                                                                                                                                                                                                                                                  | 7.4         | 9.2         | 8.6         |
| Concomitant medication                                                                                                                                    |                                                                                                                                                                                                                                                                                                                                                                                                       |             |             |             |
| Aspirin (see below)                                                                                                                                       | -                                                                                                                                                                                                                                                                                                                                                                                                     | -           | -           | -           |
| Low-dose aspirin (last year)                                                                                                                              | 47.4                                                                                                                                                                                                                                                                                                                                                                                                  | 46.5        | 53.1        | 50.8        |
| Beta-blocker                                                                                                                                              |                                                                                                                                                                                                                                                                                                                                                                                                       |             |             |             |
| NSAID (last year)                                                                                                                                         | 19.8                                                                                                                                                                                                                                                                                                                                                                                                  | 24.4        | 23.2        | 23.0        |
| Calcium channel blocker                                                                                                                                   | -                                                                                                                                                                                                                                                                                                                                                                                                     | -           | -           | -           |
| Renin angiotensin system inhibitor                                                                                                                        | -                                                                                                                                                                                                                                                                                                                                                                                                     | -           | -           | -           |
| Nonaspirin antiplatelet inhibitor (last year)                                                                                                             | 2.4                                                                                                                                                                                                                                                                                                                                                                                                   | 2.3         | 3.4         | 2.9         |
| Analysis                                                                                                                                                  | Measure of the risk of an end point                                                                                                                                                                                                                                                                                                                                                                   |             |             |             |
|                                                                                                                                                           | Crude incidence rates were also calculated as the first bleeding episode per 100 person-years. Relative risks were given as hazard ratios with 95% confidence intervals. Post hoc subgroup analyses for the primary end point of major or CRNM bleeding were performed for elderly patients (≥ 75 years old) as well as for OAC dose levels at the index date (standard and reduced dose) vs warfarin |             |             |             |
|                                                                                                                                                           | Comparison of the risk of an end point between groups                                                                                                                                                                                                                                                                                                                                                 |             |             |             |
|                                                                                                                                                           | Cox proportional hazards regression analyses were conducted to determine the risk of bleeding for the different NOACs vs. warfarin, both unadjusted and adjusted for known patient characteristics: age, sex, previous bleeding, previous OAC use, comorbidities, and concomitant medications at baseline                                                                                             |             |             |             |
|                                                                                                                                                           | Each bleeding end point was compared with the entire cohort and not in contrast to nonbleeders only, that is, for the major bleeding end point, the comparison was with all nonmajor bleedings                                                                                                                                                                                                        |             |             |             |
|                                                                                                                                                           | Software for statistical analysis                                                                                                                                                                                                                                                                                                                                                                     |             |             |             |
|                                                                                                                                                           | R (version 3.1.1, R Development Core Team)                                                                                                                                                                                                                                                                                                                                                            |             |             |             |
|                                                                                                                                                           | Statistical significance reference                                                                                                                                                                                                                                                                                                                                                                    |             |             |             |
|                                                                                                                                                           | All statistical tests were 2-tailed and <i>P</i> values < .05 were considered significant                                                                                                                                                                                                                                                                                                             |             |             |             |
| NOACs, nonvitamin K antagonist oral anticoagulants; NSAIDs, nonsteroidal anti-inflammatory drugs; SD, standard deviation; TIA, transient ischemic attack. |                                                                                                                                                                                                                                                                                                                                                                                                       |             |             |             |

|                                                                                                             |                                                                                                                                                                                                                                                                                                                                                                                                                                                                                                                                                                                                                |             |
|-------------------------------------------------------------------------------------------------------------|----------------------------------------------------------------------------------------------------------------------------------------------------------------------------------------------------------------------------------------------------------------------------------------------------------------------------------------------------------------------------------------------------------------------------------------------------------------------------------------------------------------------------------------------------------------------------------------------------------------|-------------|
| Study ID                                                                                                    | Hernández et al. <sup>71</sup>                                                                                                                                                                                                                                                                                                                                                                                                                                                                                                                                                                                 |             |
| Reference                                                                                                   | Hernández I, Baik SH, Piñera A, Zhang Y. Risk of bleeding with dabigatran in atrial fibrillation. <i>JAMA Intern Med.</i> 2015;175:18-24. doi:10.1001/jamainternmed.2014.5398                                                                                                                                                                                                                                                                                                                                                                                                                                  |             |
| Objective                                                                                                   | To compare the risk of bleeding associated with dabigatran and warfarin using Medicare data                                                                                                                                                                                                                                                                                                                                                                                                                                                                                                                    |             |
| Country                                                                                                     | United States                                                                                                                                                                                                                                                                                                                                                                                                                                                                                                                                                                                                  |             |
| Design                                                                                                      | Retrospective cohort study                                                                                                                                                                                                                                                                                                                                                                                                                                                                                                                                                                                     |             |
| Data source                                                                                                 | Centers for Medicare & Medicaid Services (CMS)                                                                                                                                                                                                                                                                                                                                                                                                                                                                                                                                                                 |             |
| Time period                                                                                                 | October 1, 2010 to October 31, 2011                                                                                                                                                                                                                                                                                                                                                                                                                                                                                                                                                                            |             |
| NOAC                                                                                                        | Dabigatran at any dose. The report did not explicitly describe the dose of interest                                                                                                                                                                                                                                                                                                                                                                                                                                                                                                                            |             |
| Control                                                                                                     | Warfarin                                                                                                                                                                                                                                                                                                                                                                                                                                                                                                                                                                                                       |             |
| Outcomes                                                                                                    | <b>Safety</b><br>Major bleeding events: <ul style="list-style-type: none"><li>• Intracranial hemorrhage</li><li>• Hemoperitoneum</li><li>• Inpatient or emergency department stays for gastrointestinal</li><li>• Hematuria</li><li>• Not otherwise specified (NOS) hemorrhage</li></ul> Minor bleeding events: <ul style="list-style-type: none"><li>• Epistaxis</li><li>• Hemoptysis</li><li>• Vaginal hemorrhage</li><li>• Hemarthrosis</li><li>• Any outpatient claim for hematuria</li><li>• Gastrointestinal</li><li>• NOS hemorrhage</li></ul> Any bleeding (including major and minor bleeding events) |             |
| Outcome definitions                                                                                         | Secondary International Classification of Diseases, Ninth Revision (ICD-9)                                                                                                                                                                                                                                                                                                                                                                                                                                                                                                                                     |             |
| Population (eligibility)                                                                                    | Patients who were newly diagnosed as having AF who filled a prescription for either dabigatran or warfarin within 2 months of the first diagnosis<br>Those who filled prescriptions for dabigatran and warfarin during the first 2 months after diagnosis were excluded                                                                                                                                                                                                                                                                                                                                        |             |
| Population (study sample)                                                                                   | <b>Study population</b><br>Dabigatran, n = 1302<br>Warfarin, n = 8102                                                                                                                                                                                                                                                                                                                                                                                                                                                                                                                                          |             |
| Population (baseline participant characteristics) (values expressed as percentages unless otherwise stated) |                                                                                                                                                                                                                                                                                                                                                                                                                                                                                                                                                                                                                |             |
|                                                                                                             | Dabigatran                                                                                                                                                                                                                                                                                                                                                                                                                                                                                                                                                                                                     | Warfarin    |
| Women                                                                                                       | 57.7                                                                                                                                                                                                                                                                                                                                                                                                                                                                                                                                                                                                           | 59.1        |
| Age, median (IQR)                                                                                           | 75.7 (8.5)                                                                                                                                                                                                                                                                                                                                                                                                                                                                                                                                                                                                     | 75.0 (10.4) |
| >65 years                                                                                                   | -                                                                                                                                                                                                                                                                                                                                                                                                                                                                                                                                                                                                              | -           |
| >75 years                                                                                                   | -                                                                                                                                                                                                                                                                                                                                                                                                                                                                                                                                                                                                              | -           |
| >85 years                                                                                                   | -                                                                                                                                                                                                                                                                                                                                                                                                                                                                                                                                                                                                              | -           |
| CHA <sub>2</sub> DS <sub>2</sub> VASc, mean (SD)                                                            |                                                                                                                                                                                                                                                                                                                                                                                                                                                                                                                                                                                                                |             |
| HAS-BLED, mean (SD)                                                                                         |                                                                                                                                                                                                                                                                                                                                                                                                                                                                                                                                                                                                                |             |
| Standard dose                                                                                               |                                                                                                                                                                                                                                                                                                                                                                                                                                                                                                                                                                                                                |             |
| Reduced dose                                                                                                |                                                                                                                                                                                                                                                                                                                                                                                                                                                                                                                                                                                                                |             |
| Comorbidities                                                                                               |                                                                                                                                                                                                                                                                                                                                                                                                                                                                                                                                                                                                                |             |
| Ischemic stroke, or systemic embolism, or TIA (previous stroke or TIA)                                      | 18.3                                                                                                                                                                                                                                                                                                                                                                                                                                                                                                                                                                                                           | 23.0        |
| Congestive heart failure                                                                                    | 41.2                                                                                                                                                                                                                                                                                                                                                                                                                                                                                                                                                                                                           | 52.4        |
| Acute myocardial infarction                                                                                 | 8.9                                                                                                                                                                                                                                                                                                                                                                                                                                                                                                                                                                                                            | 6.2         |
| Vascular disease                                                                                            | -                                                                                                                                                                                                                                                                                                                                                                                                                                                                                                                                                                                                              | -           |
| Renal dysfunction                                                                                           | -                                                                                                                                                                                                                                                                                                                                                                                                                                                                                                                                                                                                              | -           |
| Chronic kidney disease                                                                                      | 23.5                                                                                                                                                                                                                                                                                                                                                                                                                                                                                                                                                                                                           | 34.2        |
| Previous bleeding (history of bleeding)                                                                     | 6.8                                                                                                                                                                                                                                                                                                                                                                                                                                                                                                                                                                                                            | 11.7        |

|                                                                                                                                                                                     |                                                                                                                                                                                                                                                                                                                                                                                                                                                          |  |      |      |
|-------------------------------------------------------------------------------------------------------------------------------------------------------------------------------------|----------------------------------------------------------------------------------------------------------------------------------------------------------------------------------------------------------------------------------------------------------------------------------------------------------------------------------------------------------------------------------------------------------------------------------------------------------|--|------|------|
| Hypertension                                                                                                                                                                        |                                                                                                                                                                                                                                                                                                                                                                                                                                                          |  | 88.6 | 87.5 |
| Diabetes mellitus                                                                                                                                                                   |                                                                                                                                                                                                                                                                                                                                                                                                                                                          |  | 36.1 | 45.0 |
| Cancer                                                                                                                                                                              |                                                                                                                                                                                                                                                                                                                                                                                                                                                          |  | -    | -    |
| <b>Concomitant medication</b>                                                                                                                                                       |                                                                                                                                                                                                                                                                                                                                                                                                                                                          |  |      |      |
| Aspirin (included in the group below)                                                                                                                                               |                                                                                                                                                                                                                                                                                                                                                                                                                                                          |  | -    | -    |
| Use of antiplatelet (aspirin, clopidogrel, prasugrel, dipyridamole, ticlopidine, and ticagrelor)                                                                                    |                                                                                                                                                                                                                                                                                                                                                                                                                                                          |  | 6.8  | 8.2  |
| Beta-blocker                                                                                                                                                                        |                                                                                                                                                                                                                                                                                                                                                                                                                                                          |  | -    | -    |
| NSAID                                                                                                                                                                               |                                                                                                                                                                                                                                                                                                                                                                                                                                                          |  | 8.9  | 8.7  |
| Calcium channel blocker                                                                                                                                                             |                                                                                                                                                                                                                                                                                                                                                                                                                                                          |  | -    | -    |
| Renin angiotensin system inhibitor                                                                                                                                                  |                                                                                                                                                                                                                                                                                                                                                                                                                                                          |  | -    | -    |
| <b>Analysis</b>                                                                                                                                                                     | <b>Measure of the risk of an end point</b>                                                                                                                                                                                                                                                                                                                                                                                                               |  |      |      |
|                                                                                                                                                                                     | Incidence rates                                                                                                                                                                                                                                                                                                                                                                                                                                          |  |      |      |
|                                                                                                                                                                                     | <b>Comparison of the risk of an end point between groups</b>                                                                                                                                                                                                                                                                                                                                                                                             |  |      |      |
|                                                                                                                                                                                     | Cox proportional hazards regression models to evaluate the risk of bleeding                                                                                                                                                                                                                                                                                                                                                                              |  |      |      |
|                                                                                                                                                                                     | <b>Confounding</b>                                                                                                                                                                                                                                                                                                                                                                                                                                       |  |      |      |
|                                                                                                                                                                                     | Propensity score weighting conducted in 2 stages. A multivariate logistic regression was performed to predict the probability of an individual being a dabigatran or warfarin user, controlling for all of the listed covariates. In the second stage, Cox proportional hazards regression models were constructed to compare the hazard rates of bleeding between dabigatran and warfarin groups, using the inverse of the propensity score as a weight |  |      |      |
|                                                                                                                                                                                     | <b>Supplementary analyses</b>                                                                                                                                                                                                                                                                                                                                                                                                                            |  |      |      |
|                                                                                                                                                                                     | The incidence of bleeding was further examined in subgroups stratified by age (< 75 or ≥ 75 years) and among African Americans, users with renal impairment, and patients with at least 7 priority CMS conditions other than AF. Subgroup analyses were performed following the same methods and controlling for all covariates except for the one defining the subgroup                                                                                 |  |      |      |
|                                                                                                                                                                                     | <b>Software for statistical analysis</b>                                                                                                                                                                                                                                                                                                                                                                                                                 |  |      |      |
|                                                                                                                                                                                     | The CMS-RxHCC score was calculated using the CMSP prescription Drug Hierarchical Condition Categories software                                                                                                                                                                                                                                                                                                                                           |  |      |      |
| IQR, interquartile range; NOACs, nonvitamin K antagonist oral anticoagulants; NSAIDs, nonsteroidal anti-inflammatory drugs; SD, standard deviation; TIA, transient ischemic attack. |                                                                                                                                                                                                                                                                                                                                                                                                                                                          |  |      |      |

|                                                                                                                                   |                                                                                                                                                                                                                                                                                                                                                                                                                                                                                                                                                                                                               |                              |                            |                             |
|-----------------------------------------------------------------------------------------------------------------------------------|---------------------------------------------------------------------------------------------------------------------------------------------------------------------------------------------------------------------------------------------------------------------------------------------------------------------------------------------------------------------------------------------------------------------------------------------------------------------------------------------------------------------------------------------------------------------------------------------------------------|------------------------------|----------------------------|-----------------------------|
| Study ID                                                                                                                          | Hernandez et al. <sup>72</sup>                                                                                                                                                                                                                                                                                                                                                                                                                                                                                                                                                                                |                              |                            |                             |
| Reference                                                                                                                         | Hernandez I, Zhang Y. Comparing stroke and bleeding with rivaroxaban and dabigatran in atrial fibrillation: Analysis of the US Medicare Part D data. <i>Am J Cardiovasc Drugs</i> . 2017;17:37-47. doi:10.1007/s40256-016-0189-9                                                                                                                                                                                                                                                                                                                                                                              |                              |                            |                             |
| Objective                                                                                                                         | To compare effectiveness and safety between rivaroxaban 20 mg/dabigatran 150 mg and rivaroxaban 15 mg/dabigatran 75 mg among patients with atrial fibrillation (AF)                                                                                                                                                                                                                                                                                                                                                                                                                                           |                              |                            |                             |
| Country                                                                                                                           | United States                                                                                                                                                                                                                                                                                                                                                                                                                                                                                                                                                                                                 |                              |                            |                             |
| Design                                                                                                                            | Prospective cohort study                                                                                                                                                                                                                                                                                                                                                                                                                                                                                                                                                                                      |                              |                            |                             |
| Data source                                                                                                                       | Pharmacy and medical data for a 5% random sample of US Medicare beneficiaries from the Centers for Medicare and Medicaid Services (CMS)                                                                                                                                                                                                                                                                                                                                                                                                                                                                       |                              |                            |                             |
| Time period                                                                                                                       | November 2011 to December 2013                                                                                                                                                                                                                                                                                                                                                                                                                                                                                                                                                                                |                              |                            |                             |
| NOAC                                                                                                                              | Dabigatran 300 mg daily<br>Rivaroxaban 20 mg daily                                                                                                                                                                                                                                                                                                                                                                                                                                                                                                                                                            |                              |                            |                             |
| Control                                                                                                                           | Dabigatran 150 mg daily<br>Rivaroxaban 15 mg daily                                                                                                                                                                                                                                                                                                                                                                                                                                                                                                                                                            |                              |                            |                             |
| Outcomes                                                                                                                          | <b>Effectiveness</b><br>Ischemic stroke, other thromboembolic events, and all-cause mortality<br><b>Safety</b><br>Any bleeding event and major bleeding<br>Specifically reported were intracranial hemorrhage and gastrointestinal bleeding                                                                                                                                                                                                                                                                                                                                                                   |                              |                            |                             |
| Outcome definitions                                                                                                               | Ischemic stroke was defined as having 1 inpatient, emergency room, or outpatient claim with primary or secondary International Classification of Diseases, Ninth Revision (ICD-9) codes 433, 434, or 436<br>Other thromboembolic events included inpatient, emergency room, or outpatient claims for systemic embolism (ICD-9 = 444), transient ischemic attack (ICD-9 = 435), and pulmonary embolism (ICD-9 = 415.1)<br>Major bleeding events included intracranial hemorrhage, hemoperitoneum, and inpatient or emergency room stays for gastrointestinal, hematuria, or not otherwise specified hemorrhage |                              |                            |                             |
| Population (eligibility)                                                                                                          | Patients who filled a prescription for dabigatran or rivaroxaban between November 4, 2011 (the approval date for rivaroxaban) and December 31, 2013. Patients were required to have a diagnosis of AF any time before the index date according to the CMS Chronic Condition Warehouse definition of AF<br><b>Exclusion criteria</b><br>Patients who had a claim for dabigatran or rivaroxaban in the 3 months before the index date<br>Patients receiving rivaroxaban 10 mg                                                                                                                                   |                              |                            |                             |
| Population (study sample)                                                                                                         | <b>Study population</b><br>N = 17 507<br>Dabigatran 300 mg daily, n = 7322<br>Dabigatran 150 mg daily, n = 1818<br>Rivaroxaban 20 mg daily, n = 5799<br>Rivaroxaban 15 mg daily, n = 2568<br><b>Target population</b><br>N = 44 621<br>Patients who filled a prescription for dabigatran or rivaroxaban between November 4, 2011 (the approval date for rivaroxaban) and December 31, 2013. Of the 44 621 identified patients, 27 116 met the exclusion criteria and were excluded                                                                                                                            |                              |                            |                             |
| <b>Population (baseline participant characteristics after matching)</b> (values expressed as percentages unless otherwise stated) |                                                                                                                                                                                                                                                                                                                                                                                                                                                                                                                                                                                                               |                              |                            |                             |
|                                                                                                                                   | <b>Dabigatran High-dose</b>                                                                                                                                                                                                                                                                                                                                                                                                                                                                                                                                                                                   | <b>Rivaroxaban High-dose</b> | <b>Dabigatran Low-dose</b> | <b>Rivaroxaban Low-dose</b> |
| <b>Women</b>                                                                                                                      | 52.0                                                                                                                                                                                                                                                                                                                                                                                                                                                                                                                                                                                                          | 52.1                         | 66.6                       | 66.7                        |
| <b>Age, mean (SD)</b>                                                                                                             | .                                                                                                                                                                                                                                                                                                                                                                                                                                                                                                                                                                                                             | .                            | .                          | .                           |
| >65 years                                                                                                                         | 94.5                                                                                                                                                                                                                                                                                                                                                                                                                                                                                                                                                                                                          | 94.4                         | 98.1                       | 98.1                        |
| >75 years                                                                                                                         | 55.6                                                                                                                                                                                                                                                                                                                                                                                                                                                                                                                                                                                                          | 55.5                         | 83.6                       | 83.3                        |
| >85 years                                                                                                                         | .                                                                                                                                                                                                                                                                                                                                                                                                                                                                                                                                                                                                             | .                            | .                          | .                           |
| <b>CHA<sub>2</sub>DS<sub>2</sub>, mean (SD)</b>                                                                                   | 3.28 (1.75)                                                                                                                                                                                                                                                                                                                                                                                                                                                                                                                                                                                                   | 3.28 (1.96)                  | 3.83 (1.99)                | 3.83 (1.68)                 |

|                                                                                                                                                                                                                                                                                                                                                                                                                                                   |                                                                                                                                                                                                                                                                                                                                                                                                                                                                                                                                                                                          |      |      |      |     |
|---------------------------------------------------------------------------------------------------------------------------------------------------------------------------------------------------------------------------------------------------------------------------------------------------------------------------------------------------------------------------------------------------------------------------------------------------|------------------------------------------------------------------------------------------------------------------------------------------------------------------------------------------------------------------------------------------------------------------------------------------------------------------------------------------------------------------------------------------------------------------------------------------------------------------------------------------------------------------------------------------------------------------------------------------|------|------|------|-----|
| <b>HAS-BLED, mean (SD)</b>                                                                                                                                                                                                                                                                                                                                                                                                                        |                                                                                                                                                                                                                                                                                                                                                                                                                                                                                                                                                                                          | .    | .    | .    | .   |
| <b>Standard dose</b>                                                                                                                                                                                                                                                                                                                                                                                                                              |                                                                                                                                                                                                                                                                                                                                                                                                                                                                                                                                                                                          | 100  | 100  | 0    | 0   |
| <b>Reduced dose</b>                                                                                                                                                                                                                                                                                                                                                                                                                               |                                                                                                                                                                                                                                                                                                                                                                                                                                                                                                                                                                                          | 0    | 0    | 100  | 100 |
| <b>Comorbidities</b>                                                                                                                                                                                                                                                                                                                                                                                                                              |                                                                                                                                                                                                                                                                                                                                                                                                                                                                                                                                                                                          |      |      |      |     |
| Ischemic stroke, or systemic embolism, or TIA                                                                                                                                                                                                                                                                                                                                                                                                     | 22.9                                                                                                                                                                                                                                                                                                                                                                                                                                                                                                                                                                                     | 23.0 | 34.3 | 34.1 |     |
| Heart failure                                                                                                                                                                                                                                                                                                                                                                                                                                     | 51.3                                                                                                                                                                                                                                                                                                                                                                                                                                                                                                                                                                                     | 51.3 | 69.3 | 69.1 |     |
| Acute myocardial infarction                                                                                                                                                                                                                                                                                                                                                                                                                       | 6.8                                                                                                                                                                                                                                                                                                                                                                                                                                                                                                                                                                                      | 6.8  | 10.8 | 11.0 |     |
| Vascular disease                                                                                                                                                                                                                                                                                                                                                                                                                                  | .                                                                                                                                                                                                                                                                                                                                                                                                                                                                                                                                                                                        | .    | .    | .    |     |
| Renal dysfunction                                                                                                                                                                                                                                                                                                                                                                                                                                 | 27.2                                                                                                                                                                                                                                                                                                                                                                                                                                                                                                                                                                                     | 27.2 | 51.9 | 51.8 |     |
| Previous bleeding                                                                                                                                                                                                                                                                                                                                                                                                                                 | 19.6                                                                                                                                                                                                                                                                                                                                                                                                                                                                                                                                                                                     | 19.5 | 24.8 | 24.9 |     |
| Hypertension                                                                                                                                                                                                                                                                                                                                                                                                                                      | 92.9                                                                                                                                                                                                                                                                                                                                                                                                                                                                                                                                                                                     | 92.9 | 96.9 | 96.8 |     |
| Diabetes                                                                                                                                                                                                                                                                                                                                                                                                                                          | 43.8                                                                                                                                                                                                                                                                                                                                                                                                                                                                                                                                                                                     | 43.9 | 50.1 | 50.0 |     |
| Cancer                                                                                                                                                                                                                                                                                                                                                                                                                                            | .                                                                                                                                                                                                                                                                                                                                                                                                                                                                                                                                                                                        | .    | .    | .    |     |
| <b>Concomitant medication</b>                                                                                                                                                                                                                                                                                                                                                                                                                     |                                                                                                                                                                                                                                                                                                                                                                                                                                                                                                                                                                                          |      |      |      |     |
| Antiplatelets                                                                                                                                                                                                                                                                                                                                                                                                                                     | 6.6                                                                                                                                                                                                                                                                                                                                                                                                                                                                                                                                                                                      | 6.4  | 7.7  | 7.7  |     |
| Beta-blocker                                                                                                                                                                                                                                                                                                                                                                                                                                      | .                                                                                                                                                                                                                                                                                                                                                                                                                                                                                                                                                                                        | .    | .    | .    |     |
| NSAID                                                                                                                                                                                                                                                                                                                                                                                                                                             | 13.9                                                                                                                                                                                                                                                                                                                                                                                                                                                                                                                                                                                     | 13.7 | 11.1 | 11.0 |     |
| Calcium channel blocker                                                                                                                                                                                                                                                                                                                                                                                                                           | .                                                                                                                                                                                                                                                                                                                                                                                                                                                                                                                                                                                        | .    | .    | .    |     |
| Renin angiotensin system inhibitor                                                                                                                                                                                                                                                                                                                                                                                                                | .                                                                                                                                                                                                                                                                                                                                                                                                                                                                                                                                                                                        | .    | .    | .    |     |
| <b>Analysis</b>                                                                                                                                                                                                                                                                                                                                                                                                                                   | <b>Measure of the risk of an end point</b>                                                                                                                                                                                                                                                                                                                                                                                                                                                                                                                                               |      |      |      |     |
|                                                                                                                                                                                                                                                                                                                                                                                                                                                   | Number of events and cumulative incidence rates at 1-year follow-up                                                                                                                                                                                                                                                                                                                                                                                                                                                                                                                      |      |      |      |     |
|                                                                                                                                                                                                                                                                                                                                                                                                                                                   | <b>Comparison of the risk of an end point between groups</b>                                                                                                                                                                                                                                                                                                                                                                                                                                                                                                                             |      |      |      |     |
|                                                                                                                                                                                                                                                                                                                                                                                                                                                   | To compare the unadjusted cumulative incidence of effectiveness and safety outcomes at 1-year follow-up, Kaplan-Meier time-to-event curves were constructed                                                                                                                                                                                                                                                                                                                                                                                                                              |      |      |      |     |
|                                                                                                                                                                                                                                                                                                                                                                                                                                                   | Cox proportional hazards models to compare effectiveness and safety outcomes between groups, using the inverse of the propensity score for each individual as a weight. Cox models included 1 indicator variable for rivaroxaban initiation as well as all predefined covariates (below)                                                                                                                                                                                                                                                                                                 |      |      |      |     |
|                                                                                                                                                                                                                                                                                                                                                                                                                                                   | <b>Confounding</b>                                                                                                                                                                                                                                                                                                                                                                                                                                                                                                                                                                       |      |      |      |     |
|                                                                                                                                                                                                                                                                                                                                                                                                                                                   | Adjustment for demographic variables and clinical characteristics, all of which were measured at the index date. Demographic variables included age, race, and Medicaid eligibility. Clinical characteristics included CHADS <sub>2</sub> score, chronic kidney disease, hypertension, a history of stroke or TIA, prior acute myocardial infarction, diabetes, congestive heart failure, acquired hypothyroidism, number of other CMS priority comorbidities, a history of bleeding, concomitant use of nonsteroidal anti-inflammatory drugs, and concomitant use of antiplatelet drugs |      |      |      |     |
|                                                                                                                                                                                                                                                                                                                                                                                                                                                   | Using the above covariates, propensity score weighting was done in 2 steps. First, a logistic regression controlling for all of the covariates listed above was constructed to calculate the probability of initiating rivaroxaban (propensity score). Standardized differences in covariate means between 2 treatment groups were calculated to evaluate whether covariates were balanced between treatment groups after propensity score weighting                                                                                                                                     |      |      |      |     |
|                                                                                                                                                                                                                                                                                                                                                                                                                                                   | <b>Sensitivity analysis</b>                                                                                                                                                                                                                                                                                                                                                                                                                                                                                                                                                              |      |      |      |     |
|                                                                                                                                                                                                                                                                                                                                                                                                                                                   | By excluding subjects who filled a prescription for warfarin 6 months before the index date                                                                                                                                                                                                                                                                                                                                                                                                                                                                                              |      |      |      |     |
| By including and excluding patients who had a history of stroke or TIA before the index date                                                                                                                                                                                                                                                                                                                                                      |                                                                                                                                                                                                                                                                                                                                                                                                                                                                                                                                                                                          |      |      |      |     |
| Analysis robustness was assessed after excluding patients who filled a prescription for NSAIDs or antiplatelet agents after the index date                                                                                                                                                                                                                                                                                                        |                                                                                                                                                                                                                                                                                                                                                                                                                                                                                                                                                                                          |      |      |      |     |
| <b>Supplementary analyses</b>                                                                                                                                                                                                                                                                                                                                                                                                                     |                                                                                                                                                                                                                                                                                                                                                                                                                                                                                                                                                                                          |      |      |      |     |
| Subgroup analysis of the effectiveness and safety of dabigatran and rivaroxaban among 3 subgroups of patients: those aged > 75 years, patients with chronic kidney disease, or those with at least 7 CMS priority conditions other than AF. For each subgroup identified, the propensity score was recalculated and Cox models were constructed to compare effectiveness and safety outcomes following the same methodology as the overall sample |                                                                                                                                                                                                                                                                                                                                                                                                                                                                                                                                                                                          |      |      |      |     |
| <b>Software for statistical analysis</b>                                                                                                                                                                                                                                                                                                                                                                                                          |                                                                                                                                                                                                                                                                                                                                                                                                                                                                                                                                                                                          |      |      |      |     |
| SAS 9.4 (Cary, North Carolina)                                                                                                                                                                                                                                                                                                                                                                                                                    |                                                                                                                                                                                                                                                                                                                                                                                                                                                                                                                                                                                          |      |      |      |     |
| <b>Statistical significance reference</b>                                                                                                                                                                                                                                                                                                                                                                                                         |                                                                                                                                                                                                                                                                                                                                                                                                                                                                                                                                                                                          |      |      |      |     |
| Not stated                                                                                                                                                                                                                                                                                                                                                                                                                                        |                                                                                                                                                                                                                                                                                                                                                                                                                                                                                                                                                                                          |      |      |      |     |

AF, atrial fibrillation; NOACs, nonvitamin K antagonist oral anticoagulants; NSAIDs, nonsteroidal anti-inflammatory drugs; TIA, transient ischemic attack; SD, standard deviation.





|                                  |                                                                                                                                                                                                                                                                                                                                                                                                                                                                                                                                                                                                                                                                                                                                                                                                                                                                                                                                                                                                                                                                    |
|----------------------------------|--------------------------------------------------------------------------------------------------------------------------------------------------------------------------------------------------------------------------------------------------------------------------------------------------------------------------------------------------------------------------------------------------------------------------------------------------------------------------------------------------------------------------------------------------------------------------------------------------------------------------------------------------------------------------------------------------------------------------------------------------------------------------------------------------------------------------------------------------------------------------------------------------------------------------------------------------------------------------------------------------------------------------------------------------------------------|
| <b>Study ID</b>                  | Hohnloser et al. <sup>73</sup>                                                                                                                                                                                                                                                                                                                                                                                                                                                                                                                                                                                                                                                                                                                                                                                                                                                                                                                                                                                                                                     |
| <b>Reference</b>                 | Hohnloser SH, Basic E, Nabauer M. Comparative risk of major bleeding with new oral anticoagulants (NOACs) and phenprocoumon in patients with atrial fibrillation: a post-marketing surveillance study. <i>Clin Res Cardiol</i> . 2017;106:618-628. doi:10.1007/s00392-017-1098-x                                                                                                                                                                                                                                                                                                                                                                                                                                                                                                                                                                                                                                                                                                                                                                                   |
| <b>Objective</b>                 | To assess the comparative risks of bleeding leading to hospitalization during therapy with NOACs and phenprocoumon in AF patients                                                                                                                                                                                                                                                                                                                                                                                                                                                                                                                                                                                                                                                                                                                                                                                                                                                                                                                                  |
| <b>Country</b>                   | Germany                                                                                                                                                                                                                                                                                                                                                                                                                                                                                                                                                                                                                                                                                                                                                                                                                                                                                                                                                                                                                                                            |
| <b>Design</b>                    | Retrospective cohort study                                                                                                                                                                                                                                                                                                                                                                                                                                                                                                                                                                                                                                                                                                                                                                                                                                                                                                                                                                                                                                         |
| <b>Data source</b>               | Research database from the Health Risk Institute (HRI): comprises longitudinal information on medical and drug claims from an age- and sex-representative sample of about 4 million statutory health-insured subjects in Germany. Data available from each medical claim include date/quarter of service, place of service, diagnoses (International Statistical Classification of Diseases and Related Health Problems, 10th revision, German Modification [ICD-10-GM]), and procedures performed/services rendered. Data available for each drug claim include the agent dispensed (as set forth by the Anatomical Therapeutic Chemical System), dispensing/prescription date, and quantity dispensed. Selected demographic and eligibility information (including age/year of birth, sex, dates of enrollment) is also available for subjects in the HRI database                                                                                                                                                                                               |
| <b>Time period</b>               | January 1, 2013 to March 31, 2015                                                                                                                                                                                                                                                                                                                                                                                                                                                                                                                                                                                                                                                                                                                                                                                                                                                                                                                                                                                                                                  |
| <b>NOAC</b>                      | Any NOAC<br>Apixaban<br>Dabigatran<br>Rivaroxaban<br>Phenprocoumon                                                                                                                                                                                                                                                                                                                                                                                                                                                                                                                                                                                                                                                                                                                                                                                                                                                                                                                                                                                                 |
| <b>Control</b>                   | Warfarin                                                                                                                                                                                                                                                                                                                                                                                                                                                                                                                                                                                                                                                                                                                                                                                                                                                                                                                                                                                                                                                           |
| <b>Outcomes</b>                  | Major bleeding event<br>Gastrointestinal bleeding events<br>Any bleeding event<br>A composite net clinical outcome consisting of ischemic stroke, systemic embolism, or major bleeding                                                                                                                                                                                                                                                                                                                                                                                                                                                                                                                                                                                                                                                                                                                                                                                                                                                                             |
| <b>Outcome definitions</b>       | Major bleeding consisted of an emergency hospital admission with an ICD-10-GM hospital discharge diagnosis<br>Gastrointestinal bleeding was defined as bleeding at any time during exposure time with localization in the gastrointestinal tract and documented ICD-10-GM hospital discharge diagnosis<br>Any bleeding was defined using prespecified primary or secondary ICD-10-GM hospital discharge diagnoses at any time                                                                                                                                                                                                                                                                                                                                                                                                                                                                                                                                                                                                                                      |
| <b>Population (eligibility)</b>  | Adult patients (≥ 18 years) with nonvalvular AF who were new users of apixaban, dabigatran, rivaroxaban, and phenprocoumon during the study period were identified. A new user was required to have no prior prescription for any of the above-listed substances in the 12 months before initiation of medication. All patients were required to have at least 1 primary or secondary hospital discharge diagnosis of AF in the previous or same quarter of the index date or, alternatively, at least 2 ambulatory verified diagnoses of AF in the period between January 1, 2010 and the index date<br>Patients were excluded if they were not continuously represented in the HRI database for at least 1 year prior to January 1, 2013, which was defined as the baseline period. Patients with valvular AF, deep vein thrombosis, hemodialysis, pregnancy, or anticoagulation therapy (ie, heparin, low-molecular-weight heparin, vitamin K antagonists, or NOACs) for any other indication during the 4 quarters prior to or on the index date were excluded |
| <b>Population (study sample)</b> | <b>Study population</b><br>N = 35 013<br>Dabigatran, n = 3138<br>Apixaban, n = 3633<br>Rivaroxaban, n = 12 063<br>Phenprocoumon, n = 16 179<br><b>Target population</b><br>N = 154 603<br>Excluded:                                                                                                                                                                                                                                                                                                                                                                                                                                                                                                                                                                                                                                                                                                                                                                                                                                                                |

|                                                                                                             |                                                                                                                                                                                                                                                                                                                                                                                                                                                                                                                            |                          |                        |                          |                             |
|-------------------------------------------------------------------------------------------------------------|----------------------------------------------------------------------------------------------------------------------------------------------------------------------------------------------------------------------------------------------------------------------------------------------------------------------------------------------------------------------------------------------------------------------------------------------------------------------------------------------------------------------------|--------------------------|------------------------|--------------------------|-----------------------------|
|                                                                                                             | <ul style="list-style-type: none"><li>• Patients without AF or atrial flutter diagnosis in the same or preceding quarter of the index treatment, n = 50 401</li><li>• Restricted to age ≥ 18 years, n = 2</li><li>• Patients with dialysis/valvular disorder/thrombosis/gravidity in the 4 quarters before or at start date, n = 7230</li><li>• Patients with heparin at the start date, n = 2906</li><li>• Patients with NOAC or phenprocoumon prescription in the 4 quarters before the start date, n = 59 051</li></ul> |                          |                        |                          |                             |
| Population (baseline participant characteristics) (values expressed as percentages unless otherwise stated) |                                                                                                                                                                                                                                                                                                                                                                                                                                                                                                                            |                          |                        |                          |                             |
|                                                                                                             | Phenprocoumon<br>(n = 16 179)                                                                                                                                                                                                                                                                                                                                                                                                                                                                                              | Any NOAC<br>(n = 18 834) | Apixaban (n<br>= 3633) | Dabigatran<br>(n = 3138) | Rivaroxaban<br>(n = 12 063) |
| Women                                                                                                       | 49.9                                                                                                                                                                                                                                                                                                                                                                                                                                                                                                                       | 48.8                     | 50.8                   | 48.1                     | 48.3                        |
| Age, mean (SD)                                                                                              | 76.1 (9.1)                                                                                                                                                                                                                                                                                                                                                                                                                                                                                                                 | 73.7 (11.2)              | 75.5 (10.8)            | 72.6 (11.2)              | 73.4 (11.3)                 |
| >65 years                                                                                                   | -                                                                                                                                                                                                                                                                                                                                                                                                                                                                                                                          | -                        | -                      | -                        | -                           |
| >75 years                                                                                                   | -                                                                                                                                                                                                                                                                                                                                                                                                                                                                                                                          | -                        | -                      | -                        | -                           |
| >85 years                                                                                                   | -                                                                                                                                                                                                                                                                                                                                                                                                                                                                                                                          | -                        | -                      | -                        | -                           |
| CHA <sub>2</sub> DS <sub>2</sub> VASc, mean (SD)                                                            | 4.1 (1.6)                                                                                                                                                                                                                                                                                                                                                                                                                                                                                                                  | 3.8 (1.8)                | 4.1 (1.8)              | 3.8 (1.8)                | 3.7 (1.8)                   |
| HAS-BLED, mean (SD)                                                                                         | 2.7 (1.1)                                                                                                                                                                                                                                                                                                                                                                                                                                                                                                                  | 2.7 (1.2)                | 2.9 (1.2)              | 2.6 (1.2)                | 2.6 (1.2)                   |
| Standard dose                                                                                               |                                                                                                                                                                                                                                                                                                                                                                                                                                                                                                                            |                          |                        |                          |                             |
| Reduced dose                                                                                                |                                                                                                                                                                                                                                                                                                                                                                                                                                                                                                                            |                          |                        |                          |                             |
| Comorbidities                                                                                               |                                                                                                                                                                                                                                                                                                                                                                                                                                                                                                                            |                          |                        |                          |                             |
| Ischemic stroke, or systemic embolism, or TIA                                                               | 12.2                                                                                                                                                                                                                                                                                                                                                                                                                                                                                                                       | 16.1                     | 22.4                   | 21.9                     | 12.7                        |
| Congestive heart failure                                                                                    | 40.4                                                                                                                                                                                                                                                                                                                                                                                                                                                                                                                       | 34.6                     | 37.1                   | 31.7                     | 34.6                        |
| Myocardial infarction                                                                                       | 7.5                                                                                                                                                                                                                                                                                                                                                                                                                                                                                                                        | 5.0                      | 5.6                    | 5.1                      | 4.8                         |
| Vascular disease                                                                                            |                                                                                                                                                                                                                                                                                                                                                                                                                                                                                                                            |                          |                        |                          |                             |
| Coronary heart disease                                                                                      | 46.9                                                                                                                                                                                                                                                                                                                                                                                                                                                                                                                       | 37.6                     | 39.7                   | 36.7                     | 37.2                        |
| Renal insufficiency                                                                                         | 23.9                                                                                                                                                                                                                                                                                                                                                                                                                                                                                                                       | 17.3                     | 21.4                   | 13.3                     | 17.1                        |
| Previous bleeding (see below)                                                                               |                                                                                                                                                                                                                                                                                                                                                                                                                                                                                                                            |                          |                        |                          |                             |
| Major bleeding                                                                                              | 1.3                                                                                                                                                                                                                                                                                                                                                                                                                                                                                                                        | 1.4                      | 2.0                    | 1.6                      | 1.1                         |
| GI bleeding                                                                                                 | 2.1                                                                                                                                                                                                                                                                                                                                                                                                                                                                                                                        | 1.9                      | 2.1                    | 2.1                      | 1.8                         |
| Any bleeding event                                                                                          | 8.6                                                                                                                                                                                                                                                                                                                                                                                                                                                                                                                        | 8.3                      | 9.7                    | 7.5                      | 8.0                         |
| Hypertension                                                                                                | 88.5                                                                                                                                                                                                                                                                                                                                                                                                                                                                                                                       | 85.7                     | 88.2                   | 85.0                     | 85.2                        |
| Diabetes                                                                                                    | 36.8                                                                                                                                                                                                                                                                                                                                                                                                                                                                                                                       | 32.6                     | 34.2                   | 29.9                     | 32.8                        |
| Cancer                                                                                                      | 19.7                                                                                                                                                                                                                                                                                                                                                                                                                                                                                                                       | 18.4                     | 19.2                   | 17.9                     | 18.3                        |
| Concomitant medication                                                                                      |                                                                                                                                                                                                                                                                                                                                                                                                                                                                                                                            |                          |                        |                          |                             |
| Aspirin (see below)                                                                                         |                                                                                                                                                                                                                                                                                                                                                                                                                                                                                                                            |                          |                        |                          |                             |
| Antiplatelet drugs                                                                                          | 22.7                                                                                                                                                                                                                                                                                                                                                                                                                                                                                                                       | 24.7                     | 27.0                   | 25.5                     | 23.7                        |
| Aspirin                                                                                                     | 17.5                                                                                                                                                                                                                                                                                                                                                                                                                                                                                                                       | 19.7                     | 21.8                   | 19.4                     | 19.2                        |
| Beta-blocker                                                                                                |                                                                                                                                                                                                                                                                                                                                                                                                                                                                                                                            |                          |                        |                          |                             |
| NSAID                                                                                                       | 34.8                                                                                                                                                                                                                                                                                                                                                                                                                                                                                                                       | 36.9                     | 37.4                   | 36.0                     | 36.9                        |
| Calcium channel blocker                                                                                     |                                                                                                                                                                                                                                                                                                                                                                                                                                                                                                                            | -                        | -                      | -                        | -                           |
| Renin angiotensin system inhibitor                                                                          | -                                                                                                                                                                                                                                                                                                                                                                                                                                                                                                                          | -                        | -                      | -                        | -                           |
| Proton pump inhibitor                                                                                       | 43.9                                                                                                                                                                                                                                                                                                                                                                                                                                                                                                                       | 44.1                     | 46.0                   | 44.0                     | 43.6                        |
| Analysis                                                                                                    | Measure of the risk of an end point                                                                                                                                                                                                                                                                                                                                                                                                                                                                                        |                          |                        |                          |                             |
|                                                                                                             | Unadjusted event rates were estimated for each treatment group and were expressed per 100 person-years                                                                                                                                                                                                                                                                                                                                                                                                                     |                          |                        |                          |                             |
|                                                                                                             | Comparison of the risk of an end point between groups                                                                                                                                                                                                                                                                                                                                                                                                                                                                      |                          |                        |                          |                             |
|                                                                                                             | Cox proportional hazard models were used to estimate the hazard ratios of major bleeding, gastrointestinal bleeding, any bleeding, and net clinical outcome adjusted for prespecified baseline demographics and clinical factors                                                                                                                                                                                                                                                                                           |                          |                        |                          |                             |
|                                                                                                             | Confounding                                                                                                                                                                                                                                                                                                                                                                                                                                                                                                                |                          |                        |                          |                             |
|                                                                                                             | A Cox proportional hazard model was used to compare end points in each of the propensity score-matched cohorts                                                                                                                                                                                                                                                                                                                                                                                                             |                          |                        |                          |                             |
|                                                                                                             | Sensitivity analysis                                                                                                                                                                                                                                                                                                                                                                                                                                                                                                       |                          |                        |                          |                             |
|                                                                                                             | Propensity score matching was performed as a sensitivity analysis. To assess the impact of different dosages on the primary findings, the risk of major bleeding, gastrointestinal                                                                                                                                                                                                                                                                                                                                         |                          |                        |                          |                             |

|                                                                                                                                                                                                         |                                                                                                                                                                                                                                                                                                                                                                                                                                                                                                                                                                                                                                                                                                                                              |
|---------------------------------------------------------------------------------------------------------------------------------------------------------------------------------------------------------|----------------------------------------------------------------------------------------------------------------------------------------------------------------------------------------------------------------------------------------------------------------------------------------------------------------------------------------------------------------------------------------------------------------------------------------------------------------------------------------------------------------------------------------------------------------------------------------------------------------------------------------------------------------------------------------------------------------------------------------------|
|                                                                                                                                                                                                         | <p>bleeding, and any bleeding with phenprocoumon was compared only with that of those patients who received the highest approved dose of NOACs only (2 × 5 mg/day for apixaban, 2 × 150 mg/day for dabigatran, 1 × 20 mg/day for rivaroxaban)</p> <p>The respective risks of different bleeding events for each treatment were compared when prescribed in the study period or until death or the end of the insurance status. Hence, the date of a switch or of discontinuation of the OAC treatment was not used as a censoring date. Instead, the exposure times of patients who switched from 1 substance to another were assessed based on their actual exposure time under each successive anticoagulant received during follow-up</p> |
| <p>NOACs, nonvitamin K antagonist oral anticoagulants; NSAIDs, nonsteroidal anti-inflammatory drugs; NVAf, nonvalvular atrial fibrillation; SD, standard deviation; TIA, transient ischemic attack.</p> |                                                                                                                                                                                                                                                                                                                                                                                                                                                                                                                                                                                                                                                                                                                                              |

|                                                                                                             |                                                                                                                                                                                                                                                                                                                                                                                                                                                                                                                                                                                                                                                                                                                                                                                                                                                                                      |            |             |            |                  |          |                  |       |   |   |   |      |      |                |   |   |   |            |            |           |   |   |   |   |   |           |   |   |   |      |      |           |   |   |   |   |   |                                                  |   |   |   |           |           |                     |   |   |   |   |   |               |   |   |   |   |   |
|-------------------------------------------------------------------------------------------------------------|--------------------------------------------------------------------------------------------------------------------------------------------------------------------------------------------------------------------------------------------------------------------------------------------------------------------------------------------------------------------------------------------------------------------------------------------------------------------------------------------------------------------------------------------------------------------------------------------------------------------------------------------------------------------------------------------------------------------------------------------------------------------------------------------------------------------------------------------------------------------------------------|------------|-------------|------------|------------------|----------|------------------|-------|---|---|---|------|------|----------------|---|---|---|------------|------------|-----------|---|---|---|---|---|-----------|---|---|---|------|------|-----------|---|---|---|---|---|--------------------------------------------------|---|---|---|-----------|-----------|---------------------|---|---|---|---|---|---------------|---|---|---|---|---|
| Study ID                                                                                                    | Kodani et al. <sup>13</sup>                                                                                                                                                                                                                                                                                                                                                                                                                                                                                                                                                                                                                                                                                                                                                                                                                                                          |            |             |            |                  |          |                  |       |   |   |   |      |      |                |   |   |   |            |            |           |   |   |   |   |   |           |   |   |   |      |      |           |   |   |   |   |   |                                                  |   |   |   |           |           |                     |   |   |   |   |   |               |   |   |   |   |   |
| Reference                                                                                                   | Kodani E, Atarashi H, Inoue H, Okumura K, Yamashita T, Origasa H; J-RHYTHM Registry Investigators. Beneficial effect of non-vitamin k antagonist oral anticoagulants in patients with nonvalvular atrial fibrillation - Results of the J-RHYTHM Registry 2. <i>Circ J.</i> 2016;80:843-51. doi:10.1253/circj.CJ-16-0066                                                                                                                                                                                                                                                                                                                                                                                                                                                                                                                                                              |            |             |            |                  |          |                  |       |   |   |   |      |      |                |   |   |   |            |            |           |   |   |   |   |   |           |   |   |   |      |      |           |   |   |   |   |   |                                                  |   |   |   |           |           |                     |   |   |   |   |   |               |   |   |   |   |   |
| Objective                                                                                                   | To investigate the long-term outcomes of warfarin therapy vs nonvitamin K antagonist oral anticoagulants (NOACs) in Japanese patients with nonvalvular atrial fibrillation (AF)                                                                                                                                                                                                                                                                                                                                                                                                                                                                                                                                                                                                                                                                                                      |            |             |            |                  |          |                  |       |   |   |   |      |      |                |   |   |   |            |            |           |   |   |   |   |   |           |   |   |   |      |      |           |   |   |   |   |   |                                                  |   |   |   |           |           |                     |   |   |   |   |   |               |   |   |   |   |   |
| Country                                                                                                     | Japan                                                                                                                                                                                                                                                                                                                                                                                                                                                                                                                                                                                                                                                                                                                                                                                                                                                                                |            |             |            |                  |          |                  |       |   |   |   |      |      |                |   |   |   |            |            |           |   |   |   |   |   |           |   |   |   |      |      |           |   |   |   |   |   |                                                  |   |   |   |           |           |                     |   |   |   |   |   |               |   |   |   |   |   |
| Design                                                                                                      | Prospective cohort study                                                                                                                                                                                                                                                                                                                                                                                                                                                                                                                                                                                                                                                                                                                                                                                                                                                             |            |             |            |                  |          |                  |       |   |   |   |      |      |                |   |   |   |            |            |           |   |   |   |   |   |           |   |   |   |      |      |           |   |   |   |   |   |                                                  |   |   |   |           |           |                     |   |   |   |   |   |               |   |   |   |   |   |
| Data source                                                                                                 | Multicentre registry (131 institutions)                                                                                                                                                                                                                                                                                                                                                                                                                                                                                                                                                                                                                                                                                                                                                                                                                                              |            |             |            |                  |          |                  |       |   |   |   |      |      |                |   |   |   |            |            |           |   |   |   |   |   |           |   |   |   |      |      |           |   |   |   |   |   |                                                  |   |   |   |           |           |                     |   |   |   |   |   |               |   |   |   |   |   |
| Time period                                                                                                 | January 2010 to July 2010                                                                                                                                                                                                                                                                                                                                                                                                                                                                                                                                                                                                                                                                                                                                                                                                                                                            |            |             |            |                  |          |                  |       |   |   |   |      |      |                |   |   |   |            |            |           |   |   |   |   |   |           |   |   |   |      |      |           |   |   |   |   |   |                                                  |   |   |   |           |           |                     |   |   |   |   |   |               |   |   |   |   |   |
| NOAC (dosages not specified)                                                                                | Dabigatran<br>Rivaroxaban<br>Apixaban                                                                                                                                                                                                                                                                                                                                                                                                                                                                                                                                                                                                                                                                                                                                                                                                                                                |            |             |            |                  |          |                  |       |   |   |   |      |      |                |   |   |   |            |            |           |   |   |   |   |   |           |   |   |   |      |      |           |   |   |   |   |   |                                                  |   |   |   |           |           |                     |   |   |   |   |   |               |   |   |   |   |   |
| Control                                                                                                     | Warfarin<br>36.7% had baseline INR values of 1.6-1.99<br>29.0% had baseline INR values of 2.0-2.59<br>2.6% had baseline INR ≥ 3.0                                                                                                                                                                                                                                                                                                                                                                                                                                                                                                                                                                                                                                                                                                                                                    |            |             |            |                  |          |                  |       |   |   |   |      |      |                |   |   |   |            |            |           |   |   |   |   |   |           |   |   |   |      |      |           |   |   |   |   |   |                                                  |   |   |   |           |           |                     |   |   |   |   |   |               |   |   |   |   |   |
| Outcomes                                                                                                    | <b>Effectiveness</b><br>Symptomatic stroke including transient ischemic attack (TIA)<br>Systemic thromboembolism<br>All-cause mortality<br><b>Safety</b><br>Major bleeding including intracranial hemorrhage requiring hospitalization<br>All-cause mortality                                                                                                                                                                                                                                                                                                                                                                                                                                                                                                                                                                                                                        |            |             |            |                  |          |                  |       |   |   |   |      |      |                |   |   |   |            |            |           |   |   |   |   |   |           |   |   |   |      |      |           |   |   |   |   |   |                                                  |   |   |   |           |           |                     |   |   |   |   |   |               |   |   |   |   |   |
| Outcome definitions                                                                                         | Symptomatic stroke including TIA<br>Systemic thromboembolism<br>Major bleeding including intracranial hemorrhage<br>All outcomes had to be confirmed by computed tomography or magnetic resonance imaging                                                                                                                                                                                                                                                                                                                                                                                                                                                                                                                                                                                                                                                                            |            |             |            |                  |          |                  |       |   |   |   |      |      |                |   |   |   |            |            |           |   |   |   |   |   |           |   |   |   |      |      |           |   |   |   |   |   |                                                  |   |   |   |           |           |                     |   |   |   |   |   |               |   |   |   |   |   |
| Population (eligibility)                                                                                    | Outpatients aged ≥ 20 years who had at least 1 episode of AF on a standard 12-lead electrocardiogram and who had maintained sinus rhythm for more than 1 year                                                                                                                                                                                                                                                                                                                                                                                                                                                                                                                                                                                                                                                                                                                        |            |             |            |                  |          |                  |       |   |   |   |      |      |                |   |   |   |            |            |           |   |   |   |   |   |           |   |   |   |      |      |           |   |   |   |   |   |                                                  |   |   |   |           |           |                     |   |   |   |   |   |               |   |   |   |   |   |
| Population (study sample)                                                                                   | <b>Study population</b><br>N = 6616<br>Warfarin, n = 3964 (59.9%)<br>Dabigatran, n = 325 (4.9%)<br>Rivaroxaban, n = 403 (6.1%)<br>Apixaban, n = 184 (2.8%)<br>Unknown NOAC, n = 11 (0.2%)<br>Unknown OAC, n = 976 (14.8%)<br>No OAC, n = 753 (11.4%)<br><b>Target population</b><br>Of the 7937 patients in the original registry, 909 patients did not give consent for extended follow-up and were thus excluded. Of the 7027 patients with AF who had been enrolled in this extended study, 364 were excluded for valvular AF. Of the remaining 6663 patients with NVAF, 47 (0.7%) were lost to follow-up. Therefore, 6616 patients with NVAF were included in the analyses                                                                                                                                                                                                       |            |             |            |                  |          |                  |       |   |   |   |      |      |                |   |   |   |            |            |           |   |   |   |   |   |           |   |   |   |      |      |           |   |   |   |   |   |                                                  |   |   |   |           |           |                     |   |   |   |   |   |               |   |   |   |   |   |
| Population (baseline participant characteristics) (values expressed as percentages unless otherwise stated) |                                                                                                                                                                                                                                                                                                                                                                                                                                                                                                                                                                                                                                                                                                                                                                                                                                                                                      |            |             |            |                  |          |                  |       |   |   |   |      |      |                |   |   |   |            |            |           |   |   |   |   |   |           |   |   |   |      |      |           |   |   |   |   |   |                                                  |   |   |   |           |           |                     |   |   |   |   |   |               |   |   |   |   |   |
|                                                                                                             | <table><tr><td></td><td>Apixaban</td><td>Dabigatran</td><td>Rivaroxaban</td><td>Warfarin</td><td>All participants</td></tr><tr><td>Women</td><td>-</td><td>-</td><td>-</td><td>28.8</td><td>29.0</td></tr><tr><td>Age, mean (SD)</td><td>-</td><td>-</td><td>-</td><td>70.1 (9.4)</td><td>69.7 (9.9)</td></tr><tr><td>&gt;65 years</td><td>-</td><td>-</td><td>-</td><td>-</td><td>-</td></tr><tr><td>&gt;75 years</td><td>-</td><td>-</td><td>-</td><td>35.3</td><td>34.0</td></tr><tr><td>&gt;85 years</td><td>-</td><td>-</td><td>-</td><td>-</td><td>-</td></tr><tr><td>CHA<sub>2</sub>DS<sub>2</sub>VASc, mean (SD)</td><td>-</td><td>-</td><td>-</td><td>1.7 (1.2)</td><td>1.7 (1.2)</td></tr><tr><td>HAS-BLED, mean (SD)</td><td>-</td><td>-</td><td>-</td><td>-</td><td>-</td></tr><tr><td>Standard dose</td><td>-</td><td>-</td><td>-</td><td>-</td><td>-</td></tr></table> |            | Apixaban    | Dabigatran | Rivaroxaban      | Warfarin | All participants | Women | - | - | - | 28.8 | 29.0 | Age, mean (SD) | - | - | - | 70.1 (9.4) | 69.7 (9.9) | >65 years | - | - | - | - | - | >75 years | - | - | - | 35.3 | 34.0 | >85 years | - | - | - | - | - | CHA <sub>2</sub> DS <sub>2</sub> VASc, mean (SD) | - | - | - | 1.7 (1.2) | 1.7 (1.2) | HAS-BLED, mean (SD) | - | - | - | - | - | Standard dose | - | - | - | - | - |
|                                                                                                             | Apixaban                                                                                                                                                                                                                                                                                                                                                                                                                                                                                                                                                                                                                                                                                                                                                                                                                                                                             | Dabigatran | Rivaroxaban | Warfarin   | All participants |          |                  |       |   |   |   |      |      |                |   |   |   |            |            |           |   |   |   |   |   |           |   |   |   |      |      |           |   |   |   |   |   |                                                  |   |   |   |           |           |                     |   |   |   |   |   |               |   |   |   |   |   |
| Women                                                                                                       | -                                                                                                                                                                                                                                                                                                                                                                                                                                                                                                                                                                                                                                                                                                                                                                                                                                                                                    | -          | -           | 28.8       | 29.0             |          |                  |       |   |   |   |      |      |                |   |   |   |            |            |           |   |   |   |   |   |           |   |   |   |      |      |           |   |   |   |   |   |                                                  |   |   |   |           |           |                     |   |   |   |   |   |               |   |   |   |   |   |
| Age, mean (SD)                                                                                              | -                                                                                                                                                                                                                                                                                                                                                                                                                                                                                                                                                                                                                                                                                                                                                                                                                                                                                    | -          | -           | 70.1 (9.4) | 69.7 (9.9)       |          |                  |       |   |   |   |      |      |                |   |   |   |            |            |           |   |   |   |   |   |           |   |   |   |      |      |           |   |   |   |   |   |                                                  |   |   |   |           |           |                     |   |   |   |   |   |               |   |   |   |   |   |
| >65 years                                                                                                   | -                                                                                                                                                                                                                                                                                                                                                                                                                                                                                                                                                                                                                                                                                                                                                                                                                                                                                    | -          | -           | -          | -                |          |                  |       |   |   |   |      |      |                |   |   |   |            |            |           |   |   |   |   |   |           |   |   |   |      |      |           |   |   |   |   |   |                                                  |   |   |   |           |           |                     |   |   |   |   |   |               |   |   |   |   |   |
| >75 years                                                                                                   | -                                                                                                                                                                                                                                                                                                                                                                                                                                                                                                                                                                                                                                                                                                                                                                                                                                                                                    | -          | -           | 35.3       | 34.0             |          |                  |       |   |   |   |      |      |                |   |   |   |            |            |           |   |   |   |   |   |           |   |   |   |      |      |           |   |   |   |   |   |                                                  |   |   |   |           |           |                     |   |   |   |   |   |               |   |   |   |   |   |
| >85 years                                                                                                   | -                                                                                                                                                                                                                                                                                                                                                                                                                                                                                                                                                                                                                                                                                                                                                                                                                                                                                    | -          | -           | -          | -                |          |                  |       |   |   |   |      |      |                |   |   |   |            |            |           |   |   |   |   |   |           |   |   |   |      |      |           |   |   |   |   |   |                                                  |   |   |   |           |           |                     |   |   |   |   |   |               |   |   |   |   |   |
| CHA <sub>2</sub> DS <sub>2</sub> VASc, mean (SD)                                                            | -                                                                                                                                                                                                                                                                                                                                                                                                                                                                                                                                                                                                                                                                                                                                                                                                                                                                                    | -          | -           | 1.7 (1.2)  | 1.7 (1.2)        |          |                  |       |   |   |   |      |      |                |   |   |   |            |            |           |   |   |   |   |   |           |   |   |   |      |      |           |   |   |   |   |   |                                                  |   |   |   |           |           |                     |   |   |   |   |   |               |   |   |   |   |   |
| HAS-BLED, mean (SD)                                                                                         | -                                                                                                                                                                                                                                                                                                                                                                                                                                                                                                                                                                                                                                                                                                                                                                                                                                                                                    | -          | -           | -          | -                |          |                  |       |   |   |   |      |      |                |   |   |   |            |            |           |   |   |   |   |   |           |   |   |   |      |      |           |   |   |   |   |   |                                                  |   |   |   |           |           |                     |   |   |   |   |   |               |   |   |   |   |   |
| Standard dose                                                                                               | -                                                                                                                                                                                                                                                                                                                                                                                                                                                                                                                                                                                                                                                                                                                                                                                                                                                                                    | -          | -           | -          | -                |          |                  |       |   |   |   |      |      |                |   |   |   |            |            |           |   |   |   |   |   |           |   |   |   |      |      |           |   |   |   |   |   |                                                  |   |   |   |           |           |                     |   |   |   |   |   |               |   |   |   |   |   |

|                                                                                                                                                                                                  |                                                                                                                                                                                                                                                                                                                                                                                                                                                                                       |   |   |      |      |
|--------------------------------------------------------------------------------------------------------------------------------------------------------------------------------------------------|---------------------------------------------------------------------------------------------------------------------------------------------------------------------------------------------------------------------------------------------------------------------------------------------------------------------------------------------------------------------------------------------------------------------------------------------------------------------------------------|---|---|------|------|
| <b>Reduced dose</b>                                                                                                                                                                              | -                                                                                                                                                                                                                                                                                                                                                                                                                                                                                     | - | - | -    | -    |
| <b>Comorbidities</b>                                                                                                                                                                             | -                                                                                                                                                                                                                                                                                                                                                                                                                                                                                     | - | - |      |      |
| Ischemic stroke, or systemic embolism, or TIA                                                                                                                                                    | -                                                                                                                                                                                                                                                                                                                                                                                                                                                                                     | - | - | 14.7 | 13.8 |
| Heart failure                                                                                                                                                                                    | -                                                                                                                                                                                                                                                                                                                                                                                                                                                                                     | - | - | 30.1 | 27.2 |
| Myocardial infarction                                                                                                                                                                            | -                                                                                                                                                                                                                                                                                                                                                                                                                                                                                     | - | - | -    | -    |
| Vascular disease                                                                                                                                                                                 | -                                                                                                                                                                                                                                                                                                                                                                                                                                                                                     | - | - | -    | -    |
| Renal dysfunction                                                                                                                                                                                | -                                                                                                                                                                                                                                                                                                                                                                                                                                                                                     | - | - | -    | -    |
| Previous bleeding                                                                                                                                                                                | -                                                                                                                                                                                                                                                                                                                                                                                                                                                                                     | - | - | -    | -    |
| Hypertension                                                                                                                                                                                     | -                                                                                                                                                                                                                                                                                                                                                                                                                                                                                     | - | - | 61.1 | 60.1 |
| Diabetes                                                                                                                                                                                         | -                                                                                                                                                                                                                                                                                                                                                                                                                                                                                     | - | - | 18.7 | 18.2 |
| Cancer                                                                                                                                                                                           | -                                                                                                                                                                                                                                                                                                                                                                                                                                                                                     | - | - | -    | -    |
| <b>Concomitant medication</b>                                                                                                                                                                    | -                                                                                                                                                                                                                                                                                                                                                                                                                                                                                     | - | - |      |      |
| Aspirin                                                                                                                                                                                          | -                                                                                                                                                                                                                                                                                                                                                                                                                                                                                     | - | - | 20.7 | 18.0 |
| Beta-blocker                                                                                                                                                                                     | -                                                                                                                                                                                                                                                                                                                                                                                                                                                                                     | - | - | -    | -    |
| NSAID                                                                                                                                                                                            | -                                                                                                                                                                                                                                                                                                                                                                                                                                                                                     | - | - | -    | -    |
| Calcium channel blocker                                                                                                                                                                          | -                                                                                                                                                                                                                                                                                                                                                                                                                                                                                     | - | - | -    | -    |
| Renin angiotensin system inhibitor                                                                                                                                                               | -                                                                                                                                                                                                                                                                                                                                                                                                                                                                                     | - | - | -    | -    |
| <b>Analysis</b>                                                                                                                                                                                  | <b>Measure of the risk of an end point</b><br>Event rates in 3 groups according to the final status of anticoagulation therapy at the time of the event or at the end of follow-up: patients taking warfarin (Warfarin group), any NOAC (NOAC group), and no anticoagulant (No-OAC group)                                                                                                                                                                                             |   |   |      |      |
|                                                                                                                                                                                                  | <b>Comparison of the risk of an end point between groups</b><br>Frequencies of events were compared using chi-square or Fisher’s exact test<br>Kaplan-Meier curves for time to events were compared with log-rank tests<br>A Cox proportional hazard model                                                                                                                                                                                                                            |   |   |      |      |
|                                                                                                                                                                                                  | <b>Confounding</b><br>Odds ratios for each event in the Warfarin and NOAC groups were calculated by multivariate logistic regression analysis adjusted for the components of the CHA <sub>2</sub> DS <sub>2</sub> -VASc score (congestive heart failure, hypertension, age ≥ 75 years, diabetes mellitus, history of ischemic stroke or TIA, vascular disease [coronary artery disease], age 65-74 years, and female sex) and antiplatelet use, using the No-OAC group as a reference |   |   |      |      |
|                                                                                                                                                                                                  | <b>Sensitivity analysis</b><br>Not reported                                                                                                                                                                                                                                                                                                                                                                                                                                           |   |   |      |      |
|                                                                                                                                                                                                  | <b>Supplementary analyses</b><br>Multivariate Cox regression analysis of the effect of the INR subgroup on the risk of thromboembolic events and major hemorrhage<br>Multivariate logistic regression analysis of the effect of warfarin on all-cause and cardiovascular mortality                                                                                                                                                                                                    |   |   |      |      |
|                                                                                                                                                                                                  | <b>Software for statistical analysis</b><br>IBM SPSS Statistics for Windows, version 23.0 (IBM Corp, Armonk, New York)                                                                                                                                                                                                                                                                                                                                                                |   |   |      |      |
|                                                                                                                                                                                                  | <b>Statistical significance reference</b><br>A 2-sided <i>P</i> value < .05                                                                                                                                                                                                                                                                                                                                                                                                           |   |   |      |      |
|                                                                                                                                                                                                  |                                                                                                                                                                                                                                                                                                                                                                                                                                                                                       |   |   |      |      |
|                                                                                                                                                                                                  |                                                                                                                                                                                                                                                                                                                                                                                                                                                                                       |   |   |      |      |
|                                                                                                                                                                                                  |                                                                                                                                                                                                                                                                                                                                                                                                                                                                                       |   |   |      |      |
| NOACs, nonvitamin K antagonist oral anticoagulants; NSAIDs, nonsteroidal anti-inflammatory drugs; NVAF, nonvalvular atrial fibrillation; SD, standard deviation; TIA, transient ischemic attack. |                                                                                                                                                                                                                                                                                                                                                                                                                                                                                       |   |   |      |      |

|                                                                                                                    |                                                                                                                                                                                                                                                                                                                                                                                                                                                                                                                                                                                                                                                                                                                                                                                                                                                                                                         |
|--------------------------------------------------------------------------------------------------------------------|---------------------------------------------------------------------------------------------------------------------------------------------------------------------------------------------------------------------------------------------------------------------------------------------------------------------------------------------------------------------------------------------------------------------------------------------------------------------------------------------------------------------------------------------------------------------------------------------------------------------------------------------------------------------------------------------------------------------------------------------------------------------------------------------------------------------------------------------------------------------------------------------------------|
| <b>Study ID</b>                                                                                                    | Lai et al. <sup>74</sup>                                                                                                                                                                                                                                                                                                                                                                                                                                                                                                                                                                                                                                                                                                                                                                                                                                                                                |
| <b>Reference</b>                                                                                                   | Lai CL, Chen HM, Liao MT, Lin TT, Chan KA. Comparative effectiveness and safety of dabigatran and rivaroxaban in atrial fibrillation patients. <i>J Am Heart Assoc.</i> 2017;6:e005362. doi:10.1161/JAHA.116.005362                                                                                                                                                                                                                                                                                                                                                                                                                                                                                                                                                                                                                                                                                     |
| <b>Objective</b>                                                                                                   | To examine the comparative effectiveness and safety between dabigatran and rivaroxaban in atrial fibrillation patients                                                                                                                                                                                                                                                                                                                                                                                                                                                                                                                                                                                                                                                                                                                                                                                  |
| <b>Country</b>                                                                                                     | China                                                                                                                                                                                                                                                                                                                                                                                                                                                                                                                                                                                                                                                                                                                                                                                                                                                                                                   |
| <b>Design</b>                                                                                                      | Nationwide cohort study                                                                                                                                                                                                                                                                                                                                                                                                                                                                                                                                                                                                                                                                                                                                                                                                                                                                                 |
| <b>Data source</b>                                                                                                 | National Health Insurance claims database                                                                                                                                                                                                                                                                                                                                                                                                                                                                                                                                                                                                                                                                                                                                                                                                                                                               |
| <b>Time period</b>                                                                                                 | June 1, 2012 to May 31, 2014                                                                                                                                                                                                                                                                                                                                                                                                                                                                                                                                                                                                                                                                                                                                                                                                                                                                            |
| <b>NOAC</b>                                                                                                        | <ul style="list-style-type: none"> <li>• Dabigatran 110 mg</li> <li>• Dabigatran 150 mg</li> <li>• Rivaroxaban 10 mg</li> <li>• Rivaroxaban 15 mg</li> <li>• Rivaroxaban 20 mg</li> </ul> <p>86% of patients in the dabigatran group received 110 mg; 75% of patients in the rivaroxaban group received 15 mg, 21% received 20 mg, and 4% received 10 mg. Therefore, patients receiving different doses of the same study medication (110 and 150 mg for dabigatran; 10, 15, and 20 mg for rivaroxaban) were pooled into 1 study group for their respective drugs</p>                                                                                                                                                                                                                                                                                                                                   |
| <b>Control</b>                                                                                                     | No control                                                                                                                                                                                                                                                                                                                                                                                                                                                                                                                                                                                                                                                                                                                                                                                                                                                                                              |
| <b>Outcomes</b>                                                                                                    | <p><b>Effectiveness</b></p> <ul style="list-style-type: none"> <li>• Death</li> <li>• Ischemic stroke</li> <li>• Acute myocardial infarction</li> <li>• Arterial embolism/thrombosis</li> </ul> <p><b>Safety</b></p> <ul style="list-style-type: none"> <li>• Intracranial hemorrhage</li> <li>• Gastrointestinal hemorrhage</li> </ul>                                                                                                                                                                                                                                                                                                                                                                                                                                                                                                                                                                 |
| <b>Outcome definitions</b>                                                                                         | International Classification of Diseases, 9th Revision (ICD-9-CM)                                                                                                                                                                                                                                                                                                                                                                                                                                                                                                                                                                                                                                                                                                                                                                                                                                       |
| <b>Population (eligibility)</b>                                                                                    | All adult beneficiaries aged $\geq 20$ years with a diagnosis of atrial fibrillation and flutter and prescriptions of study medications within the enrollment period were identified. The date of the first prescription of dabigatran or rivaroxaban was operationally defined as the index date. In addition, subjects having diagnoses of deep vein thrombosis, pulmonary embolism, mitral stenosis or procedures including valvular replacement, mitral commissurotomy, heart transplantation, or extracorporeal circulatory support within the 6-month period prior to the index date were excluded. Finally, patients receiving 2 study medications at the same time or having concomitant antiplatelet agents such as aspirin, clopidogrel, ticlopidine, or dipyridamole on the index date were excluded                                                                                         |
| <b>Population (study sample)</b>                                                                                   | <p><b>Study population</b></p> <p>N = 15 234 subjects were included</p> <p>Dabigatran, n = 10 625</p> <p>Rivaroxaban, n = 4609</p> <p>After applying a PS-matching procedure, 4600 dabigatran users were successfully matched to 4600 rivaroxaban users</p> <p><b>Target population</b></p> <p>N = 18 278</p> <p>Excluded:</p> <ul style="list-style-type: none"> <li>• Sex missing, n = 31</li> <li>• Diagnosis of DVT or PE within 6 months prior to the index date, n = 162</li> <li>• Diagnosis of MS within 6 months prior to the index date, n = 118</li> <li>• Valve replacement, commissurotomy, heart transplantation, or extracorporeal circulation within 6 months prior to the index date, n = 4</li> <li>• Two study medications prescribed on the index date, n = 48</li> <li>• Prescription of aspirin, clopidogrel, ticlopidine, or dipyridamole on the index date, n = 2681</li> </ul> |
| <b>Population (baseline participant characteristics) (values expressed as percentages unless otherwise stated)</b> |                                                                                                                                                                                                                                                                                                                                                                                                                                                                                                                                                                                                                                                                                                                                                                                                                                                                                                         |
| <div>Overall population</div> <div>PS-matched population</div>                                                     |                                                                                                                                                                                                                                                                                                                                                                                                                                                                                                                                                                                                                                                                                                                                                                                                                                                                                                         |

|                                                     | Dabigatran | Rivaroxaban | Dabigatran | Rivaroxaban |
|-----------------------------------------------------|------------|-------------|------------|-------------|
| <b>Women</b>                                        | 43.3       | 45.3        | 45.4       | 45.2        |
| <b>Age, median (IQR)</b>                            | 76 (69-82) | 76 (70-82)  | 76 (70-82) | 76 (70-82)  |
| <65 years                                           | 12.9       | 12.0        | 11.6       | 12.0        |
| 65-74 years                                         | 29.8       | 30.5        | 30.1       | 30.5        |
| ≥75 years                                           | 57.3       | 57.6        | 58.4       | 57.5        |
| <b>CHA<sub>2</sub>DS<sub>2</sub>VASc, mean (SD)</b> | 3.3 (1.5)  | 3.3 (1.5)   | 3.3 (1.5)  | 3.3 (1.5)   |
| <b>HAS-BLED, mean (SD)</b>                          | -          | -           | -          | -           |
| <b>Standard dose</b>                                |            |             |            |             |
| <b>Reduced dose</b>                                 |            |             |            |             |
| <b>Comorbidities</b>                                |            |             |            |             |
| Ischemic stroke, or systemic embolism, or TIA       | 23.8       | 19.4        | 19.1       | 19.5        |
| Heart failure (see below)                           |            |             |            |             |
| Valvular heart disease                              | 24.4       | 26.4        | 26.1       | 26.3        |
| Myocardial infarction                               | 1.1        | 1.3         | 1.4        | 1.3         |
| Vascular disease                                    | 3.5        | 3.4         | 3.3        | 3.4         |
| Renal dysfunction (failure)                         | 4.7        | 4.7         | 4.8        | 4.7         |
| Previous bleeding (see below)                       |            |             |            |             |
| Intracranial hemorrhage                             | 1.1        | 1.2         | 1.1        | 1.2         |
| Hypertension                                        | 49.0       | 49.7        | 49.4       | 49.7        |
| Diabetes mellitus                                   | 20.2       | 20.2        | 20.4       | 20.2        |
| Cancer (see below)                                  |            |             |            |             |
| Solid tumor without metastasis                      | 5.7        | 5.7         | 5.3        | 5.7         |
| <b>Concomitant medication</b>                       |            |             |            |             |
| Aspirin                                             | 42.8       | 44.3        | 44.3       | 44.3        |
| Beta-blocker                                        | 52.3       | 53.9        | 53.7       | 53.8        |
| NSAID                                               | 55.5       | 58.0        | 57.6       | 57.9        |
| Calcium channel blocker                             | -          | -           | -          | -           |
| Renin angiotensin system inhibitor                  | -          | -           | -          | -           |
| Warfarin                                            | 51.0       | 46.3        | 46.2       | 46.3        |
| Clopidogrel                                         | 8.1        | 9.5         | 9.2        | 9.5         |
| Ticlopidine                                         | 2.6        | 2.7         | 2.6        | 2.7         |
| Dipyridamole                                        | 8.2        | 9.0         | 8.6        | 9.0         |
| Digoxin                                             | 26.3       | 25.0        | 24.8       | 25.0        |
| Amiodarone                                          | 17.4       | 18.7        | 19.0       | 18.7        |
| Dronedarone                                         | 2.4        | 4.2         | 4.0        | 4.2         |
| Verapamil                                           | 3.5        | 4.0         | 3.5        | 3.9         |
| Diltiazem                                           | 20.4       | 20.2        | 19.9       | 20.2        |
| Dihydropyridine CCB                                 | 34.7       | 33.5        | 33.3       | 33.4        |
| ACEI                                                | 14.4       | 13.6        | 13.8       | 13.5        |
| ARB                                                 | 53.1       | 52.2        | 51.4       | 52.2        |



|                                                                                                                                                                                                                                                                                                                           |                                                                                                                                                                                                                                                                                                                                                                                                                                                                                                                                                                                                                                                                                                                                                                                                                                                                                                                                                                                                                                                                                                                                                                                                                                                                                                                                                                                                                                                                    |      |      |      |
|---------------------------------------------------------------------------------------------------------------------------------------------------------------------------------------------------------------------------------------------------------------------------------------------------------------------------|--------------------------------------------------------------------------------------------------------------------------------------------------------------------------------------------------------------------------------------------------------------------------------------------------------------------------------------------------------------------------------------------------------------------------------------------------------------------------------------------------------------------------------------------------------------------------------------------------------------------------------------------------------------------------------------------------------------------------------------------------------------------------------------------------------------------------------------------------------------------------------------------------------------------------------------------------------------------------------------------------------------------------------------------------------------------------------------------------------------------------------------------------------------------------------------------------------------------------------------------------------------------------------------------------------------------------------------------------------------------------------------------------------------------------------------------------------------------|------|------|------|
| Loop diuretic                                                                                                                                                                                                                                                                                                             | 30.1                                                                                                                                                                                                                                                                                                                                                                                                                                                                                                                                                                                                                                                                                                                                                                                                                                                                                                                                                                                                                                                                                                                                                                                                                                                                                                                                                                                                                                                               | 33.9 | 33.3 | 33.8 |
| Thiazide                                                                                                                                                                                                                                                                                                                  | 7.1                                                                                                                                                                                                                                                                                                                                                                                                                                                                                                                                                                                                                                                                                                                                                                                                                                                                                                                                                                                                                                                                                                                                                                                                                                                                                                                                                                                                                                                                | 6.5  | 6.5  | 6.5  |
| Spironolactone                                                                                                                                                                                                                                                                                                            | 12.3                                                                                                                                                                                                                                                                                                                                                                                                                                                                                                                                                                                                                                                                                                                                                                                                                                                                                                                                                                                                                                                                                                                                                                                                                                                                                                                                                                                                                                                               | 14.7 | 14.6 | 14.6 |
| Statin                                                                                                                                                                                                                                                                                                                    | 28.1                                                                                                                                                                                                                                                                                                                                                                                                                                                                                                                                                                                                                                                                                                                                                                                                                                                                                                                                                                                                                                                                                                                                                                                                                                                                                                                                                                                                                                                               | 28.2 | 27.7 | 28.2 |
| OAD                                                                                                                                                                                                                                                                                                                       | 23.8                                                                                                                                                                                                                                                                                                                                                                                                                                                                                                                                                                                                                                                                                                                                                                                                                                                                                                                                                                                                                                                                                                                                                                                                                                                                                                                                                                                                                                                               | 23.6 | 23.0 | 23.6 |
| Insulin                                                                                                                                                                                                                                                                                                                   | 6.6                                                                                                                                                                                                                                                                                                                                                                                                                                                                                                                                                                                                                                                                                                                                                                                                                                                                                                                                                                                                                                                                                                                                                                                                                                                                                                                                                                                                                                                                | 6.9  | 6.9  | 6.9  |
| PPI                                                                                                                                                                                                                                                                                                                       | 11.0                                                                                                                                                                                                                                                                                                                                                                                                                                                                                                                                                                                                                                                                                                                                                                                                                                                                                                                                                                                                                                                                                                                                                                                                                                                                                                                                                                                                                                                               | 12.3 | 12.1 | 12.3 |
| H2-blocker                                                                                                                                                                                                                                                                                                                | 29.0                                                                                                                                                                                                                                                                                                                                                                                                                                                                                                                                                                                                                                                                                                                                                                                                                                                                                                                                                                                                                                                                                                                                                                                                                                                                                                                                                                                                                                                               | 30.6 | 30.5 | 30.6 |
| Analysis                                                                                                                                                                                                                                                                                                                  | <p><b>Measure of the risk of an end point</b></p> <p>Incidence rates of various clinical outcomes are presented as cases per 100 person-years among the overall population and the PS-matched population</p> <p><b>Comparison of the risk of an end point between groups</b></p> <p>The marginal proportional hazards model was applied for estimation of the relative risks (hazard ratios) of various clinical outcomes between the dabigatran group and the rivaroxaban group among the PS-matched population as the primary analysis</p> <p>Using a chi-square test for categorical variables and the 2-sample <i>t</i> test for normally distributed continuous variables, baseline characteristics were compared between the dabigatran group and the rivaroxaban group in the overall population. The standardized difference was also used to measure covariate balance, whereby an absolute standardized difference greater than 0.10 represented meaningful imbalance</p> <p><b>Confounding</b></p> <p>A PS was derived using logistic regression to model the probability of receipt of rivaroxaban (or dabigatran) as a function of all of the potential confounders</p> <p><b>Software for statistical analysis</b></p> <p>SAS software, version 9.4 (SAS Institute, Inc, Cary, North Carolina)</p> <p><b>Statistical significance reference</b></p> <p>All reported <i>P</i> values were 2-sided, and the significance level was set at &lt; .05</p> |      |      |      |
| ACEi, angiotensin-converting enzyme inhibitor; ARB, angiotensin receptor blocker; CCB, calcium channel blocker; DVT, deep venous thrombosis; IQR, interquartile range; MS, mitral stenosis; NSAIDs, nonsteroidal anti-inflammatory drugs; PE, pulmonary embolism; SD, standard deviation; TIA, transient ischemic attack. |                                                                                                                                                                                                                                                                                                                                                                                                                                                                                                                                                                                                                                                                                                                                                                                                                                                                                                                                                                                                                                                                                                                                                                                                                                                                                                                                                                                                                                                                    |      |      |      |

|                                                                                                             |                                                                                                                                                                                                                                                                                                                                                                                                                                                                                                                                                                                                                                                                                                                                                                                                                                                                                                                                              |            |
|-------------------------------------------------------------------------------------------------------------|----------------------------------------------------------------------------------------------------------------------------------------------------------------------------------------------------------------------------------------------------------------------------------------------------------------------------------------------------------------------------------------------------------------------------------------------------------------------------------------------------------------------------------------------------------------------------------------------------------------------------------------------------------------------------------------------------------------------------------------------------------------------------------------------------------------------------------------------------------------------------------------------------------------------------------------------|------------|
| Study ID                                                                                                    | Laliberté et al. <sup>75</sup>                                                                                                                                                                                                                                                                                                                                                                                                                                                                                                                                                                                                                                                                                                                                                                                                                                                                                                               |            |
| Reference                                                                                                   | Laliberté F, Cloutier M, Nelson WW, Coleman CI, Pilon D, Olson WH, et al. Real-world comparative effectiveness and safety of rivaroxaban and warfarin in nonvalvular atrial fibrillation patients. <i>Curr Med Res Opin.</i> 2014;30:1317-1325. doi:10.1185/03007995.2014.907140                                                                                                                                                                                                                                                                                                                                                                                                                                                                                                                                                                                                                                                             |            |
| Objective                                                                                                   | To assess real-world safety, effectiveness, and persistence associated with rivaroxaban and warfarin in nonvalvular AF patients                                                                                                                                                                                                                                                                                                                                                                                                                                                                                                                                                                                                                                                                                                                                                                                                              |            |
| Country                                                                                                     | United States                                                                                                                                                                                                                                                                                                                                                                                                                                                                                                                                                                                                                                                                                                                                                                                                                                                                                                                                |            |
| Design                                                                                                      | Retrospective cohort study                                                                                                                                                                                                                                                                                                                                                                                                                                                                                                                                                                                                                                                                                                                                                                                                                                                                                                                   |            |
| Data source                                                                                                 | Symphony Health Solutions' (SHS) Patient Transactional Datasets                                                                                                                                                                                                                                                                                                                                                                                                                                                                                                                                                                                                                                                                                                                                                                                                                                                                              |            |
| Time period                                                                                                 | May 2011 to July 2012                                                                                                                                                                                                                                                                                                                                                                                                                                                                                                                                                                                                                                                                                                                                                                                                                                                                                                                        |            |
| NOAC                                                                                                        | Rivaroxaban 20 mg                                                                                                                                                                                                                                                                                                                                                                                                                                                                                                                                                                                                                                                                                                                                                                                                                                                                                                                            |            |
| Control                                                                                                     | Warfarin                                                                                                                                                                                                                                                                                                                                                                                                                                                                                                                                                                                                                                                                                                                                                                                                                                                                                                                                     |            |
| Outcomes                                                                                                    | <b>Effectiveness</b> <ul style="list-style-type: none"><li>• Composite stroke and systemic embolism (ischemic stroke, hemorrhagic stroke, systemic embolism)</li><li>• Venous thromboembolism events (deep vein thrombosis and pulmonary embolism)</li></ul> <b>Safety</b> <ul style="list-style-type: none"><li>• Major bleeding</li><li>• Intracranial hemorrhage</li><li>• Gastrointestinal bleeding</li></ul>                                                                                                                                                                                                                                                                                                                                                                                                                                                                                                                            |            |
| Outcome definitions                                                                                         | International Classification of Disease, Ninth Revision, Clinical Modification (ICD-9-CM): 427.31<br>Composite stroke and systemic embolism end points were required to be identified during a hospitalization or emergency department visit as a primary or secondary diagnosis<br>VTE events were required to be identified during either (1) a hospitalization or emergency department visit or (2) during an outpatient visit with a 6-month washout (to ensure the identification of a new VTE event)<br>Hemorrhagic stroke was defined as the occurrence of both a diagnosis of ICH and a diagnosis of late effects of cerebrovascular disease during the same hospitalization                                                                                                                                                                                                                                                         |            |
| Population (eligibility)                                                                                    | Patients newly initiated on rivaroxaban or warfarin after November 2011 (the time of rivaroxaban approval for nonvalvular AF in the US), were ≥ 18 years of age, had a CHADS <sub>2</sub> score ≥ 1 during the 180-day baseline period, and had ≥ 2 diagnoses of AF during the baseline or follow-up period. The study patients were required to have at least 6 months of clinical activity (a variable included in the SHS data) prior to the index date (baseline period). Patients with prior use of warfarin but who initiated rivaroxaban after its approval in November 2011 were classified in the rivaroxaban cohort, consistent with recent clinical trials studying the use of novel oral anticoagulants by AF patients that have combined VKA-experienced and -naïve patients<br>Patients diagnosed at baseline with valvular involvement, pregnancy, malignant cancers, and transient causes of AF were excluded from the study |            |
| Population (study sample)                                                                                   | <b>Study population</b><br>Rivaroxaban, n = 3654<br>Warfarin, n = 26 825<br><b>Target population</b><br>N = 1 083 888<br>Excluded: <ul style="list-style-type: none"><li>• Less than 180 days of continuous activity: rivaroxaban, n = 4968; warfarin, n = 180 030</li><li>• Not newly initiated (180-day washout period): warfarin, n = 600 817</li><li>• Less than 2 AF diagnoses, n = 0</li><li>• Less than 18 years of age, n = 0</li><li>• Valvular involvement, pregnancy, malignant cancer, transient causes of AF: rivaroxaban, n = 1378; warfarin, n = 12 397</li></ul>                                                                                                                                                                                                                                                                                                                                                             |            |
| Population (baseline participant characteristics) (values expressed as percentages unless otherwise stated) |                                                                                                                                                                                                                                                                                                                                                                                                                                                                                                                                                                                                                                                                                                                                                                                                                                                                                                                                              |            |
|                                                                                                             | Rivaroxaban                                                                                                                                                                                                                                                                                                                                                                                                                                                                                                                                                                                                                                                                                                                                                                                                                                                                                                                                  | Warfarin   |
| Women                                                                                                       | 51.0                                                                                                                                                                                                                                                                                                                                                                                                                                                                                                                                                                                                                                                                                                                                                                                                                                                                                                                                         | 51.5       |
| Age, mean (SD)                                                                                              | 73.3 (8.4)                                                                                                                                                                                                                                                                                                                                                                                                                                                                                                                                                                                                                                                                                                                                                                                                                                                                                                                                   | 73.7 (8.3) |
| >65 years                                                                                                   | -                                                                                                                                                                                                                                                                                                                                                                                                                                                                                                                                                                                                                                                                                                                                                                                                                                                                                                                                            | -          |

|                                                                                                                                                             |                                                                                                                                                                                                                                          |           |
|-------------------------------------------------------------------------------------------------------------------------------------------------------------|------------------------------------------------------------------------------------------------------------------------------------------------------------------------------------------------------------------------------------------|-----------|
| >75 years                                                                                                                                                   | -                                                                                                                                                                                                                                        | -         |
| >85 years                                                                                                                                                   | -                                                                                                                                                                                                                                        | -         |
| CHA <sub>2</sub> DS <sub>2</sub> VASc, mean (SD)                                                                                                            | 3.4 (1.4)                                                                                                                                                                                                                                | 3.5 (1.4) |
| HAS-BLED, mean (SD)                                                                                                                                         | 1.9 (0.8)                                                                                                                                                                                                                                | 1.9 (0.8) |
| Standard dose                                                                                                                                               | 100                                                                                                                                                                                                                                      | 100       |
| Reduced dose                                                                                                                                                | -                                                                                                                                                                                                                                        | -         |
| Comorbidities                                                                                                                                               |                                                                                                                                                                                                                                          |           |
| Ischemic stroke, or systemic embolism, or TIA                                                                                                               | -                                                                                                                                                                                                                                        | -         |
| Cerebrovascular accident (stroke)                                                                                                                           | 9.8                                                                                                                                                                                                                                      | 9.8       |
| Heart failure                                                                                                                                               | 19.6                                                                                                                                                                                                                                     | 20.8      |
| Myocardial infarction                                                                                                                                       | -                                                                                                                                                                                                                                        | -         |
| Vascular disease                                                                                                                                            | -                                                                                                                                                                                                                                        | -         |
| Renal dysfunction                                                                                                                                           | -                                                                                                                                                                                                                                        | -         |
| Renal disease                                                                                                                                               | 12.2                                                                                                                                                                                                                                     | 13.0      |
| Chronic kidney disease                                                                                                                                      | 7.5                                                                                                                                                                                                                                      | 8.2       |
| Previous bleeding                                                                                                                                           | 7.8                                                                                                                                                                                                                                      | 8.0       |
| Hypertension                                                                                                                                                | 71.9                                                                                                                                                                                                                                     | 71.3      |
| Diabetes                                                                                                                                                    | 25.2                                                                                                                                                                                                                                     | 26.4      |
| Cancer                                                                                                                                                      | -                                                                                                                                                                                                                                        | -         |
| Concomitant medication                                                                                                                                      |                                                                                                                                                                                                                                          |           |
| Aspirin                                                                                                                                                     | -                                                                                                                                                                                                                                        | -         |
| Beta-blocker                                                                                                                                                | -                                                                                                                                                                                                                                        | -         |
| NSAID                                                                                                                                                       | 12.7                                                                                                                                                                                                                                     | 11.9      |
| Calcium channel blocker                                                                                                                                     | -                                                                                                                                                                                                                                        | -         |
| Renin angiotensin system inhibitor                                                                                                                          | -                                                                                                                                                                                                                                        | -         |
| Analysis                                                                                                                                                    | Measure of the risk of an end point                                                                                                                                                                                                      |           |
|                                                                                                                                                             | Hazards ratios                                                                                                                                                                                                                           |           |
|                                                                                                                                                             | Comparison of the risk of an end point between groups                                                                                                                                                                                    |           |
|                                                                                                                                                             | Cox proportional hazard models were used to compare event and persistence rates                                                                                                                                                          |           |
|                                                                                                                                                             | Confounding                                                                                                                                                                                                                              |           |
|                                                                                                                                                             | Propensity score matching was performed to minimize sample selection bias and the risk of confounding between rivaroxaban and warfarin users                                                                                             |           |
|                                                                                                                                                             | Propensity scores were calculated using a multivariate logistic regression model, incorporating the following baseline characteristics: demographics, insurance type comorbidities, and risk factors for bleeding, stroke and VTE events |           |
|                                                                                                                                                             | Sensitivity analysis                                                                                                                                                                                                                     |           |
|                                                                                                                                                             | Conducted for the analysis of persistence with therapy for rivaroxaban and warfarin users, where the use of other oral anticoagulants (ie, dabigatran) during follow-up was allowed (not considered a gap in therapy)                    |           |
|                                                                                                                                                             | Software for statistical analysis                                                                                                                                                                                                        |           |
| SAS 9.3 (SAS Institute Inc, Cary, North Carolina)                                                                                                           |                                                                                                                                                                                                                                          |           |
| Statistical significance reference                                                                                                                          |                                                                                                                                                                                                                                          |           |
| Statistical significance was assessed with 2-sided tests at a significant level of .05                                                                      |                                                                                                                                                                                                                                          |           |
| AF, atrial fibrillation; NSAIDs, nonsteroidal anti-inflammatory drugs; TIA, transient ischemic attack; SD, standard deviation; VTE, venous thromboembolism. |                                                                                                                                                                                                                                          |           |

|                                                                                                                    |                                                                                                                                                                                                                                                                                                                                                                                                                                                                                                                                                                                             |                          |                 |                                |                          |                 |
|--------------------------------------------------------------------------------------------------------------------|---------------------------------------------------------------------------------------------------------------------------------------------------------------------------------------------------------------------------------------------------------------------------------------------------------------------------------------------------------------------------------------------------------------------------------------------------------------------------------------------------------------------------------------------------------------------------------------------|--------------------------|-----------------|--------------------------------|--------------------------|-----------------|
| Study ID                                                                                                           | Larsen et al. <sup>76</sup>                                                                                                                                                                                                                                                                                                                                                                                                                                                                                                                                                                 |                          |                 |                                |                          |                 |
| Reference                                                                                                          | Larsen TB, Gorst-Rasmussen A, Rasmussen LH, Skjøth F, Rosenzweig M, Lip GY. Bleeding events among new starters and switchers to dabigatran compared with warfarin in atrial fibrillation. <i>Am J Med.</i> 2014;127:650-656. doi:10.1016/j.amjmed.2014.01.031                                                                                                                                                                                                                                                                                                                               |                          |                 |                                |                          |                 |
| Objective                                                                                                          | To assess bleeding safety of dabigatran relative to warfarin within each stratum of VKA-naïve and VKA-experienced patients with atrial fibrillation                                                                                                                                                                                                                                                                                                                                                                                                                                         |                          |                 |                                |                          |                 |
| Country                                                                                                            | Denmark                                                                                                                                                                                                                                                                                                                                                                                                                                                                                                                                                                                     |                          |                 |                                |                          |                 |
| Design                                                                                                             | Nationwide cohort study                                                                                                                                                                                                                                                                                                                                                                                                                                                                                                                                                                     |                          |                 |                                |                          |                 |
| Data source                                                                                                        | Three Danish nationwide databases: <ul style="list-style-type: none"><li>• Danish National Prescription Registry (purchase date, Anatomical Therapeutic Chemical classification code, and package size for every prescription purchase in Denmark since 1994)</li><li>• Danish National Patient Register (admission/discharge date, and discharge International Classification of Diseases diagnoses for &gt; 99% of somatic hospital admissions in Denmark)</li><li>• Danish Civil Registration System (with information on sex, date of birth, and vital and emigration status)</li></ul> |                          |                 |                                |                          |                 |
| Time period                                                                                                        | August 1, 2011 (dabigatran market entry) to May 30, 2013<br>August 1, 2009 to May 30, 2013 (warfarin)                                                                                                                                                                                                                                                                                                                                                                                                                                                                                       |                          |                 |                                |                          |                 |
| NOAC                                                                                                               | <ul style="list-style-type: none"><li>• Dabigatran 110 mg</li><li>• Dabigatran 150 mg</li></ul>                                                                                                                                                                                                                                                                                                                                                                                                                                                                                             |                          |                 |                                |                          |                 |
| Control                                                                                                            | Warfarin (according to VKA experience status)                                                                                                                                                                                                                                                                                                                                                                                                                                                                                                                                               |                          |                 |                                |                          |                 |
| Outcomes                                                                                                           | <b>Safety</b> <ul style="list-style-type: none"><li>• Major bleeding</li><li>• Intracranial bleeding</li><li>• Fatal bleeding</li><li>• Gastrointestinal bleeding</li><li>• Any bleeding</li></ul>                                                                                                                                                                                                                                                                                                                                                                                          |                          |                 |                                |                          |                 |
| Outcome definitions                                                                                                | End points were ascertained according to the International Classification of Disease, 10th revision (ICD-10). Major bleeding, intracranial bleeding (including retinal bleeding and traumatic intracranial bleeding), fatal bleeding (death within 30 days from any bleeding event), gastrointestinal bleeding, and any of the preceding (“any bleeding”)                                                                                                                                                                                                                                   |                          |                 |                                |                          |                 |
| Population (eligibility)                                                                                           | Included: first-time purchases of dabigatran and warfarin purchases during the study time period<br>Excluded: purchases made by patients without a prior hospital diagnosis of atrial fibrillation; or with a prior hospital diagnoses of mitral stenosis, venous thromboembolism, or valvular surgery; or with a previous purchase of phenprocoumon                                                                                                                                                                                                                                        |                          |                 |                                |                          |                 |
| Population (study sample)                                                                                          | <b>Study population</b><br>Patients with a first-time dabigatran purchase, n = 11 315<br>VKA-naïve, n = 7063; VKA-experienced, n = 4252<br>Warfarin, n = 22 630 (VKA-naïve, n = 14 126; VKA-experienced, n = 8504)                                                                                                                                                                                                                                                                                                                                                                          |                          |                 |                                |                          |                 |
| <b>Population (baseline participant characteristics) (values expressed as percentages unless otherwise stated)</b> |                                                                                                                                                                                                                                                                                                                                                                                                                                                                                                                                                                                             |                          |                 |                                |                          |                 |
|                                                                                                                    | <b>VKA-naïve stratum</b>                                                                                                                                                                                                                                                                                                                                                                                                                                                                                                                                                                    |                          |                 | <b>VKA-experienced stratum</b> |                          |                 |
|                                                                                                                    | <b>Dabigatran 110 mg</b>                                                                                                                                                                                                                                                                                                                                                                                                                                                                                                                                                                    | <b>Dabigatran 150 mg</b> | <b>Warfarin</b> | <b>Dabigatran 110 mg</b>       | <b>Dabigatran 150 mg</b> | <b>Warfarin</b> |
| <b>Women</b>                                                                                                       | 55.1                                                                                                                                                                                                                                                                                                                                                                                                                                                                                                                                                                                        | 36.6                     | 41.3            | 54.4                           | 35.2                     | 38.4            |
| <b>Age, median (IQR)</b>                                                                                           | 82 (77-86)                                                                                                                                                                                                                                                                                                                                                                                                                                                                                                                                                                                  | 67 (62-72)               | 73 (66-80)      | 82 (77-86)                     | 69 (64-73)               | 74 (67-81)      |
| ≥65 years                                                                                                          | 95.3                                                                                                                                                                                                                                                                                                                                                                                                                                                                                                                                                                                        | 63.6                     | 76.8            | 96.9                           | 70.9                     | 81.8            |
| ≥75 years                                                                                                          | 80.1                                                                                                                                                                                                                                                                                                                                                                                                                                                                                                                                                                                        | 13.7                     | 42.5            | 80.3                           | 18.3                     | 46.2            |
| >85 years                                                                                                          | -                                                                                                                                                                                                                                                                                                                                                                                                                                                                                                                                                                                           | -                        | -               | -                              | -                        | -               |
| <b>CHA<sub>2</sub>DS<sub>2</sub>VASc, mean (SD)</b>                                                                | 3.70 (1.47)                                                                                                                                                                                                                                                                                                                                                                                                                                                                                                                                                                                 | 2.12 (1.41)              | 2.80 (1.67)     | 3.89 (1.47)                    | 2.59 (1.54)              | 3.01 (1.59)     |
| <b>HAS-BLED, mean (SD)</b>                                                                                         | 2.32 (1.04)                                                                                                                                                                                                                                                                                                                                                                                                                                                                                                                                                                                 | 1.70 (1.11)              | 1.97 (1.18)     | 2.22 (1.01)                    | 1.83 (1.08)              | 1.87 (1.03)     |
| <b>Standard dose</b>                                                                                               | 100                                                                                                                                                                                                                                                                                                                                                                                                                                                                                                                                                                                         | 100                      | 100             | 100                            | 100                      | 100             |
| <b>Reduced dose</b>                                                                                                | -                                                                                                                                                                                                                                                                                                                                                                                                                                                                                                                                                                                           | -                        | -               | -                              | -                        | -               |
| <b>Comorbidities</b>                                                                                               |                                                                                                                                                                                                                                                                                                                                                                                                                                                                                                                                                                                             |                          |                 |                                |                          |                 |
| Ischemic stroke, or                                                                                                | 26.5                                                                                                                                                                                                                                                                                                                                                                                                                                                                                                                                                                                        | 16.3                     | 16.9            | 27.9                           | 19.0                     | 19.6            |

|                                                                                                                                                             |                                                                                                                                                                                                                                                                                                                                                                                              |      |      |      |      |      |
|-------------------------------------------------------------------------------------------------------------------------------------------------------------|----------------------------------------------------------------------------------------------------------------------------------------------------------------------------------------------------------------------------------------------------------------------------------------------------------------------------------------------------------------------------------------------|------|------|------|------|------|
| systemic embolism, or TIA                                                                                                                                   |                                                                                                                                                                                                                                                                                                                                                                                              |      |      |      |      |      |
| Heart failure                                                                                                                                               | -                                                                                                                                                                                                                                                                                                                                                                                            | -    | -    | -    | -    | -    |
| Myocardial infarction                                                                                                                                       | -                                                                                                                                                                                                                                                                                                                                                                                            | -    | -    | -    | -    | -    |
| Vascular disease                                                                                                                                            | -                                                                                                                                                                                                                                                                                                                                                                                            | -    | -    | -    | -    | -    |
| Renal dysfunction                                                                                                                                           | 3.1                                                                                                                                                                                                                                                                                                                                                                                          | 1.3  | 7.0  | 4.7  | 2.8  | 4.6  |
| Previous bleeding                                                                                                                                           | 18.7                                                                                                                                                                                                                                                                                                                                                                                         | 11.1 | 13.4 | 22.1 | 15.1 | 16.0 |
| Hypertension                                                                                                                                                | 34.8                                                                                                                                                                                                                                                                                                                                                                                         | 33.0 | 34.1 | 37.9 | 44.7 | 39.6 |
| Diabetes                                                                                                                                                    | 13.6                                                                                                                                                                                                                                                                                                                                                                                         | 11.2 | 14.7 | 16   | 15.9 | 16.8 |
| Cancer                                                                                                                                                      | -                                                                                                                                                                                                                                                                                                                                                                                            | -    | -    | -    | -    | -    |
| <b>Concomitant medication</b>                                                                                                                               |                                                                                                                                                                                                                                                                                                                                                                                              |      |      |      |      |      |
| Aspirin                                                                                                                                                     | 41.1                                                                                                                                                                                                                                                                                                                                                                                         | 32.9 | 38.6 | 24.0 | 21.4 | 18.4 |
| Beta-blocker                                                                                                                                                | -                                                                                                                                                                                                                                                                                                                                                                                            | -    | -    | -    | -    | -    |
| NSAID                                                                                                                                                       | 5.9                                                                                                                                                                                                                                                                                                                                                                                          | 6.0  | 5.3  | 4.9  | 4.5  | 4.5  |
| Calcium channel blocker                                                                                                                                     | -                                                                                                                                                                                                                                                                                                                                                                                            | -    | -    | -    | -    | -    |
| Renin angiotensin system inhibitor                                                                                                                          | -                                                                                                                                                                                                                                                                                                                                                                                            | -    | -    | -    | -    | -    |
| Clopidogrel                                                                                                                                                 | 8.1                                                                                                                                                                                                                                                                                                                                                                                          | 5.0  | 6.1  | 3.4  | 2.3  | 1.2  |
| <b>Analysis</b>                                                                                                                                             | <b>Measure of the risk of an end point</b>                                                                                                                                                                                                                                                                                                                                                   |      |      |      |      |      |
|                                                                                                                                                             | Crude cumulative incidences of bleeding were estimated with the Aalen-Johansen method under competing risks of death                                                                                                                                                                                                                                                                         |      |      |      |      |      |
|                                                                                                                                                             | <b>Comparison of the risk of an end point between groups</b>                                                                                                                                                                                                                                                                                                                                 |      |      |      |      |      |
|                                                                                                                                                             | Risk time from the baseline date until the first occurrence of the relevant bleeding event, emigration, death, or July 31, 2013                                                                                                                                                                                                                                                              |      |      |      |      |      |
|                                                                                                                                                             | Cox proportional hazards regression models to estimate hazard ratios of bleeding events for each of the 6 different combinations of treatment (D110, D150, and warfarin) and VKA experience status, with VKA-naïve warfarin users as a reference                                                                                                                                             |      |      |      |      |      |
|                                                                                                                                                             | <b>Confounding</b>                                                                                                                                                                                                                                                                                                                                                                           |      |      |      |      |      |
|                                                                                                                                                             | Regression models were adjusted for the following baseline characteristics: age (continuous; cubic spline); components of CHA <sub>2</sub> DS <sub>2</sub> VASc and HAS-BLED (binary); months since August 2011 (continuous; cubic spline). In the analyses restricted to the VKA-experienced stratum, time since initiation of VKA therapy (continuous; cubic spline) was also adjusted for |      |      |      |      |      |
|                                                                                                                                                             | <b>Sensitivity analysis</b>                                                                                                                                                                                                                                                                                                                                                                  |      |      |      |      |      |
|                                                                                                                                                             | Per-protocol-type sensitivity analysis was used to investigate the effect of continuous treatment, censoring individuals at the time of nonpersistence (time of treatment switching or > 30 days discontinuation, ascertained from previous package sizes and a standard daily dose)                                                                                                         |      |      |      |      |      |
|                                                                                                                                                             | <b>Supplementary analyses</b>                                                                                                                                                                                                                                                                                                                                                                |      |      |      |      |      |
|                                                                                                                                                             | To assess the extent to which subjects followed the assumed treatment, 3-month persistence probabilities were also estimated with the Aalen-Johansen method under competing risks of death                                                                                                                                                                                                   |      |      |      |      |      |
|                                                                                                                                                             | <b>Software for statistical analysis</b>                                                                                                                                                                                                                                                                                                                                                     |      |      |      |      |      |
|                                                                                                                                                             | Stata/MP version 12.1                                                                                                                                                                                                                                                                                                                                                                        |      |      |      |      |      |
|                                                                                                                                                             | <b>Statistical significance reference</b>                                                                                                                                                                                                                                                                                                                                                    |      |      |      |      |      |
|                                                                                                                                                             | A 2-sided <i>P</i> value < .05 was considered statistically significant                                                                                                                                                                                                                                                                                                                      |      |      |      |      |      |
| IQR, interquartile range; NSAIDs, nonsteroidal anti-inflammatory drugs; SD, standard deviation; TIA, transient ischemic attack; VKAs, vitamin K antagonists |                                                                                                                                                                                                                                                                                                                                                                                              |      |      |      |      |      |

|                                                                                                                    |                                                                                                                                                                                                                                                                                                                                                                                                                                                                                                                                                                                                                                                                                  |
|--------------------------------------------------------------------------------------------------------------------|----------------------------------------------------------------------------------------------------------------------------------------------------------------------------------------------------------------------------------------------------------------------------------------------------------------------------------------------------------------------------------------------------------------------------------------------------------------------------------------------------------------------------------------------------------------------------------------------------------------------------------------------------------------------------------|
| <b>Study ID</b>                                                                                                    | Larsen et al. <sup>77</sup>                                                                                                                                                                                                                                                                                                                                                                                                                                                                                                                                                                                                                                                      |
| <b>Reference</b>                                                                                                   | Larsen TB, Rasmussen LH, Gorst-Rasmussen A, Skjøth F, Lane DA, Lip GY. Dabigatran and warfarin for secondary prevention of stroke in atrial fibrillation patients: A nationwide cohort study. <i>Am J Med.</i> 2014;127:1172-1178. doi:10.1016/j.amjmed.2014.07.023                                                                                                                                                                                                                                                                                                                                                                                                              |
| <b>Objective</b>                                                                                                   | To evaluate the effectiveness of dabigatran relative to warfarin for secondary prevention of stroke/transient ischemic attack among “new starters” on anticoagulant therapy                                                                                                                                                                                                                                                                                                                                                                                                                                                                                                      |
| <b>Country</b>                                                                                                     | Denmark                                                                                                                                                                                                                                                                                                                                                                                                                                                                                                                                                                                                                                                                          |
| <b>Design</b>                                                                                                      | Nationwide cohort study                                                                                                                                                                                                                                                                                                                                                                                                                                                                                                                                                                                                                                                          |
| <b>Data source</b>                                                                                                 | Three Danish nationwide databases: <ul style="list-style-type: none"> <li>• The Danish National Prescription Registry (with information on purchase date, Anatomical Therapeutic Chemical classification code, and package size for every prescription purchase in Denmark since 1994)</li> <li>• The Danish National Patient Register, established in 1977, which includes admission/discharge date and discharge International Classification of Diseases diagnoses for &gt; 99% of somatic hospital admissions in Denmark</li> <li>• The Danish Civil Registration System (with information on sex, date of birth, and vital and emigration status)</li> </ul>                |
| <b>Time period</b>                                                                                                 | August 1, 2011 (dabigatran market entry in Denmark) to May 30, 2013, alongside all purchases of warfarin from August 1, 2009 to May 30, 2013                                                                                                                                                                                                                                                                                                                                                                                                                                                                                                                                     |
| <b>NOAC</b>                                                                                                        | <ul style="list-style-type: none"> <li>• Dabigatran 110 mg twice daily</li> <li>• Dabigatran 150 mg twice daily</li> </ul>                                                                                                                                                                                                                                                                                                                                                                                                                                                                                                                                                       |
| <b>Control</b>                                                                                                     | Warfarin                                                                                                                                                                                                                                                                                                                                                                                                                                                                                                                                                                                                                                                                         |
| <b>Outcomes</b>                                                                                                    | <b>Effectiveness</b> <ul style="list-style-type: none"> <li>• Stroke</li> <li>• Transient ischemic attack</li> <li>• Composite stroke/transient ischemic attack</li> <li>• Fatal strokes/transient ischemic attacks</li> </ul> <b>Safety</b> <ul style="list-style-type: none"> <li>• Bleeding risk</li> </ul>                                                                                                                                                                                                                                                                                                                                                                   |
| <b>Outcome definitions</b>                                                                                         | End points were ascertained according to the International Classification of Disease, 10th revision (ICD-10) <ul style="list-style-type: none"> <li>• Ischemic stroke (I63, I64.9)</li> <li>• Transient ischemic attack (G45)</li> <li>• Fatal stroke, not including hemorrhagic stroke (ischemic stroke or transient ischemic attack followed by death within 30 days)</li> </ul>                                                                                                                                                                                                                                                                                               |
| <b>Population (eligibility)</b>                                                                                    | Patients with atrial fibrillation and a history of stroke/transient ischemic attack making a first-time dabigatran purchase, alongside patients making a first-time warfarin purchase (controls) during the study period<br>Excluded purchases not preceded by a hospital diagnosis of atrial fibrillation, or preceded by a hospital diagnosis of mitral stenosis, venous thromboembolism, or valvular surgery, or preceded by phenprocoumon use. In accordance with the focus on secondary prevention, purchases not preceded by a hospital diagnosis of stroke/transient ischemic attack were excluded                                                                        |
| <b>Population (study sample)</b>                                                                                   | <b>Study population</b><br>VKA-naïve:<br>Dabigatran, n = 1439; warfarin, n = 1825<br>VKA-experienced:<br>Dabigatran, n = 959; warfarin, n = 1918<br><b>Target population</b><br>N = 731 407 (naïve, n = 41 613; experienced, n = 689 794)<br>Excluded: <ul style="list-style-type: none"> <li>• No prior stroke, n = 598 285 (naïve, n = 35 633; experienced, n = 562 652)</li> <li>• No prior AF, n = 32 143 (naïve, n = 2338; experienced, n = 29 805)</li> <li>• Other exclusion criteria: other hospital diagnosis of mitral stenosis, venous thromboembolism, valvular surgery, or prior phenprocoumon use, n = 20 203 (naïve, n = 378; experienced, n = 19 825)</li> </ul> |
| <b>Population (baseline participant characteristics)</b> (values expressed as percentages unless otherwise stated) |                                                                                                                                                                                                                                                                                                                                                                                                                                                                                                                                                                                                                                                                                  |

|                                                                 | Vitamin K antagonist-naïve                                                                                                                                                                                                                                                                                                                                                                                                                                                                                                                                                                                                                                                                                                                                                                                                                                                                                                                                                                                                                                                                                                                                                                                                                                                                                                                                                                                                                 |                      |                      | Vitamin K antagonist-experienced |                      |                      |
|-----------------------------------------------------------------|--------------------------------------------------------------------------------------------------------------------------------------------------------------------------------------------------------------------------------------------------------------------------------------------------------------------------------------------------------------------------------------------------------------------------------------------------------------------------------------------------------------------------------------------------------------------------------------------------------------------------------------------------------------------------------------------------------------------------------------------------------------------------------------------------------------------------------------------------------------------------------------------------------------------------------------------------------------------------------------------------------------------------------------------------------------------------------------------------------------------------------------------------------------------------------------------------------------------------------------------------------------------------------------------------------------------------------------------------------------------------------------------------------------------------------------------|----------------------|----------------------|----------------------------------|----------------------|----------------------|
|                                                                 | Warfarin                                                                                                                                                                                                                                                                                                                                                                                                                                                                                                                                                                                                                                                                                                                                                                                                                                                                                                                                                                                                                                                                                                                                                                                                                                                                                                                                                                                                                                   | Dabigatran<br>110 mg | Dabigatran<br>150 mg | Warfarin                         | Dabigatran<br>110 mg | Dabigatran<br>150 mg |
| <b>Women</b>                                                    | 41.4                                                                                                                                                                                                                                                                                                                                                                                                                                                                                                                                                                                                                                                                                                                                                                                                                                                                                                                                                                                                                                                                                                                                                                                                                                                                                                                                                                                                                                       | 54.7                 | 36.7                 | 37.9                             | 54                   | 34.4                 |
| <b>Age, median (IQR)</b>                                        | 72 (65-79)                                                                                                                                                                                                                                                                                                                                                                                                                                                                                                                                                                                                                                                                                                                                                                                                                                                                                                                                                                                                                                                                                                                                                                                                                                                                                                                                                                                                                                 | 81 (76-86)           | 67 (62-72)           | 74 (67-80)                       | 81 (76-85)           | 68 (64-73)           |
| >65 years                                                       | -                                                                                                                                                                                                                                                                                                                                                                                                                                                                                                                                                                                                                                                                                                                                                                                                                                                                                                                                                                                                                                                                                                                                                                                                                                                                                                                                                                                                                                          | -                    | -                    | -                                | -                    | -                    |
| >75 years                                                       | -                                                                                                                                                                                                                                                                                                                                                                                                                                                                                                                                                                                                                                                                                                                                                                                                                                                                                                                                                                                                                                                                                                                                                                                                                                                                                                                                                                                                                                          | -                    | -                    | -                                | -                    | -                    |
| >85 years                                                       | -                                                                                                                                                                                                                                                                                                                                                                                                                                                                                                                                                                                                                                                                                                                                                                                                                                                                                                                                                                                                                                                                                                                                                                                                                                                                                                                                                                                                                                          | -                    | -                    | -                                | -                    | -                    |
| <b>CHA<sub>2</sub>DS<sub>2</sub>VASc, mean (SD)</b>             | 1.73 (1.06)                                                                                                                                                                                                                                                                                                                                                                                                                                                                                                                                                                                                                                                                                                                                                                                                                                                                                                                                                                                                                                                                                                                                                                                                                                                                                                                                                                                                                                | 2.01 (0.90)          | 1.50 (1.02)          | 1.66 (0.91)                      | 1.94 (0.87)          | 1.63 (1.00)          |
| <b>HAS-BLED, mean (SD)</b>                                      | 0.96 (0.88)                                                                                                                                                                                                                                                                                                                                                                                                                                                                                                                                                                                                                                                                                                                                                                                                                                                                                                                                                                                                                                                                                                                                                                                                                                                                                                                                                                                                                                | 1.38 (0.82)          | 0.61 (0.74)          | 1.16 (0.90)                      | 1.54 (0.87)          | 0.91 (0.86)          |
| <b>Standard dose</b>                                            | 100                                                                                                                                                                                                                                                                                                                                                                                                                                                                                                                                                                                                                                                                                                                                                                                                                                                                                                                                                                                                                                                                                                                                                                                                                                                                                                                                                                                                                                        | 100                  | 100                  | 100                              | 100                  | 100                  |
| <b>Reduced dose</b>                                             | -                                                                                                                                                                                                                                                                                                                                                                                                                                                                                                                                                                                                                                                                                                                                                                                                                                                                                                                                                                                                                                                                                                                                                                                                                                                                                                                                                                                                                                          | -                    | -                    | -                                | -                    | -                    |
| <b>Comorbidities</b>                                            |                                                                                                                                                                                                                                                                                                                                                                                                                                                                                                                                                                                                                                                                                                                                                                                                                                                                                                                                                                                                                                                                                                                                                                                                                                                                                                                                                                                                                                            |                      |                      |                                  |                      |                      |
| Ischemic stroke, or systemic embolism, or TIA                   | -                                                                                                                                                                                                                                                                                                                                                                                                                                                                                                                                                                                                                                                                                                                                                                                                                                                                                                                                                                                                                                                                                                                                                                                                                                                                                                                                                                                                                                          | -                    | -                    | -                                | -                    | -                    |
| Prior ischemic stroke                                           | 75.3                                                                                                                                                                                                                                                                                                                                                                                                                                                                                                                                                                                                                                                                                                                                                                                                                                                                                                                                                                                                                                                                                                                                                                                                                                                                                                                                                                                                                                       | 81.2                 | 74.9                 | 75.7                             | 82.1                 | 76.5                 |
| Prior transient ischemic attack                                 | 36.3                                                                                                                                                                                                                                                                                                                                                                                                                                                                                                                                                                                                                                                                                                                                                                                                                                                                                                                                                                                                                                                                                                                                                                                                                                                                                                                                                                                                                                       | 32.0                 | 35.8                 | 37.2                             | 32.4                 | 34.7                 |
| Heart failure                                                   | -                                                                                                                                                                                                                                                                                                                                                                                                                                                                                                                                                                                                                                                                                                                                                                                                                                                                                                                                                                                                                                                                                                                                                                                                                                                                                                                                                                                                                                          | -                    | -                    | -                                | -                    | -                    |
| Myocardial infarction (see below)                               | -                                                                                                                                                                                                                                                                                                                                                                                                                                                                                                                                                                                                                                                                                                                                                                                                                                                                                                                                                                                                                                                                                                                                                                                                                                                                                                                                                                                                                                          | -                    | -                    | -                                | -                    | -                    |
| Prior myocardial infarction, unstable angina, or cardiac arrest | 17.6                                                                                                                                                                                                                                                                                                                                                                                                                                                                                                                                                                                                                                                                                                                                                                                                                                                                                                                                                                                                                                                                                                                                                                                                                                                                                                                                                                                                                                       | 17.5                 | 8.4                  | 19.8                             | 25.0                 | 22.1                 |
| Vascular disease                                                | -                                                                                                                                                                                                                                                                                                                                                                                                                                                                                                                                                                                                                                                                                                                                                                                                                                                                                                                                                                                                                                                                                                                                                                                                                                                                                                                                                                                                                                          | -                    | -                    | -                                | -                    | -                    |
| Renal dysfunction                                               | 9.5                                                                                                                                                                                                                                                                                                                                                                                                                                                                                                                                                                                                                                                                                                                                                                                                                                                                                                                                                                                                                                                                                                                                                                                                                                                                                                                                                                                                                                        | 3.9                  | 0.9                  | 6.0                              | 3.3                  | 3.2                  |
| Previous bleeding                                               | 16.2                                                                                                                                                                                                                                                                                                                                                                                                                                                                                                                                                                                                                                                                                                                                                                                                                                                                                                                                                                                                                                                                                                                                                                                                                                                                                                                                                                                                                                       | 20.9                 | 13.0                 | 19.2                             | 24.5                 | 19.7                 |
| Hypertension                                                    | 36.4                                                                                                                                                                                                                                                                                                                                                                                                                                                                                                                                                                                                                                                                                                                                                                                                                                                                                                                                                                                                                                                                                                                                                                                                                                                                                                                                                                                                                                       | 33.0                 | 29.6                 | 37.7                             | 36.7                 | 38.1                 |
| Diabetes                                                        | 16.1                                                                                                                                                                                                                                                                                                                                                                                                                                                                                                                                                                                                                                                                                                                                                                                                                                                                                                                                                                                                                                                                                                                                                                                                                                                                                                                                                                                                                                       | 15.4                 | 13.0                 | 18.0                             | 14.1                 | 20.6                 |
| Cancer                                                          | -                                                                                                                                                                                                                                                                                                                                                                                                                                                                                                                                                                                                                                                                                                                                                                                                                                                                                                                                                                                                                                                                                                                                                                                                                                                                                                                                                                                                                                          | -                    | -                    | -                                | -                    | -                    |
| <b>Concomitant medication</b>                                   |                                                                                                                                                                                                                                                                                                                                                                                                                                                                                                                                                                                                                                                                                                                                                                                                                                                                                                                                                                                                                                                                                                                                                                                                                                                                                                                                                                                                                                            |                      |                      |                                  |                      |                      |
| Aspirin                                                         | 43.0                                                                                                                                                                                                                                                                                                                                                                                                                                                                                                                                                                                                                                                                                                                                                                                                                                                                                                                                                                                                                                                                                                                                                                                                                                                                                                                                                                                                                                       | 42.7                 | 34.8                 | 23.0                             | 25.6                 | 21.8                 |
| Beta-blocker                                                    | -                                                                                                                                                                                                                                                                                                                                                                                                                                                                                                                                                                                                                                                                                                                                                                                                                                                                                                                                                                                                                                                                                                                                                                                                                                                                                                                                                                                                                                          | -                    | -                    | -                                | -                    | -                    |
| NSAID                                                           | 5.2                                                                                                                                                                                                                                                                                                                                                                                                                                                                                                                                                                                                                                                                                                                                                                                                                                                                                                                                                                                                                                                                                                                                                                                                                                                                                                                                                                                                                                        | 4.2                  | 4.8                  | 4.3                              | 4.4                  | 4.9                  |
| Calcium channel blocker                                         | -                                                                                                                                                                                                                                                                                                                                                                                                                                                                                                                                                                                                                                                                                                                                                                                                                                                                                                                                                                                                                                                                                                                                                                                                                                                                                                                                                                                                                                          | -                    | -                    | -                                | -                    | -                    |
| Renin angiotensin system inhibitor                              | -                                                                                                                                                                                                                                                                                                                                                                                                                                                                                                                                                                                                                                                                                                                                                                                                                                                                                                                                                                                                                                                                                                                                                                                                                                                                                                                                                                                                                                          | -                    | -                    | -                                | -                    | -                    |
| Clopidogrel                                                     | 21.4                                                                                                                                                                                                                                                                                                                                                                                                                                                                                                                                                                                                                                                                                                                                                                                                                                                                                                                                                                                                                                                                                                                                                                                                                                                                                                                                                                                                                                       | 20.1                 | 20.3                 | 3.0                              | 6.4                  | 5.8                  |
| Clopidogrel and aspirin/NSAID                                   | 7.7                                                                                                                                                                                                                                                                                                                                                                                                                                                                                                                                                                                                                                                                                                                                                                                                                                                                                                                                                                                                                                                                                                                                                                                                                                                                                                                                                                                                                                        | 6.2                  | 5.0                  | 0.4                              | 2.0                  | 1.5                  |
| <b>Analysis</b>                                                 | <p><b>Measure of the risk of an end point</b></p> <p>Crude cumulative incidences of stroke/transient ischemic attack were calculated with the Aalen-Johansen method under competing risk of death</p> <p><b>Comparison of the risk of an end point between groups</b></p> <p>Time-to-event analysis was used to compare the risk of stroke/transient ischemic attack between treatment groups within the 2 VKA-experienced strata (naïve/experienced), measuring risk time from baseline and until the relevant event, emigration, death, or July 31, 2013, whichever came first</p> <p>Cox regression was used to contrast event rates between dabigatran users and warfarin controls within each of the VKA-experienced strata</p> <p><b>Confounding</b></p> <p>Regression analyses were adjusted for the baseline values of the following indications: age (continuous; cubic spline); components of the CHA<sub>2</sub>DS<sub>2</sub>-VASc and HAS-BLED (binary); and months since August 2011 (continuous; cubic spline). In the VKA-experienced stratum, time since initiation of VKA therapy (continuous; cubic spline) was also adjusted for</p> <p><b>Sensitivity analysis</b></p> <p>Repeated regression analyses after individual censoring at the time of nonpersistence in order to quantify the effect of continuous treatment (implicitly assuming censoring to be noninformative conditionally on baseline covariates)</p> |                      |                      |                                  |                      |                      |

|                                                                                                                                                                                              |                                                                                                                                                                                                                                                                                                                                                                                                                                                                                                                                                                                                                                                                                                                                 |
|----------------------------------------------------------------------------------------------------------------------------------------------------------------------------------------------|---------------------------------------------------------------------------------------------------------------------------------------------------------------------------------------------------------------------------------------------------------------------------------------------------------------------------------------------------------------------------------------------------------------------------------------------------------------------------------------------------------------------------------------------------------------------------------------------------------------------------------------------------------------------------------------------------------------------------------|
|                                                                                                                                                                                              | <p>Regression analyses were also repeated when requiring end points to have been registered as the primary diagnosis in connection with hospitalization for at least 1 night</p> <p>Repeated a subset of the main analyses in the primary prevention group, that is, the analogously defined 2 VKA-experienced strata based on the subset of the warfarin/dabigatran purchase data that excluded subjects with a prior diagnosis of stroke/transient ischemic attack</p> <p><b>Software for statistical analysis</b></p> <p>Stata/MP version 12.1 (StataCorp LP, College Station, Texas)</p> <p><b>Statistical significance reference</b></p> <p>A 2-sided <i>P</i> value &lt; .05 was considered statistically significant</p> |
| <p>AF, atrial fibrillation; IQR, interquartile range; NSAIDs, nonsteroidal anti-inflammatory drugs; SD, standard deviation; TIA, transient ischemic attack; VKAs, vitamin K antagonists.</p> |                                                                                                                                                                                                                                                                                                                                                                                                                                                                                                                                                                                                                                                                                                                                 |



|                                                                                                             |                                                                                                                                                                                                                                                                                                                                                                                                                                                                                                                                                                                                                                                          |                  |                  |                  |                  |          |                  |       |      |      |      |      |      |                   |                  |                  |                  |                  |                  |
|-------------------------------------------------------------------------------------------------------------|----------------------------------------------------------------------------------------------------------------------------------------------------------------------------------------------------------------------------------------------------------------------------------------------------------------------------------------------------------------------------------------------------------------------------------------------------------------------------------------------------------------------------------------------------------------------------------------------------------------------------------------------------------|------------------|------------------|------------------|------------------|----------|------------------|-------|------|------|------|------|------|-------------------|------------------|------------------|------------------|------------------|------------------|
| Study ID                                                                                                    | Larsen et al. <sup>52</sup>                                                                                                                                                                                                                                                                                                                                                                                                                                                                                                                                                                                                                              |                  |                  |                  |                  |          |                  |       |      |      |      |      |      |                   |                  |                  |                  |                  |                  |
| Reference                                                                                                   | Larsen TB, Skjøth F, Nielsen PB, Kjældgaard JN, Lip GY. Comparative effectiveness and safety of non-vitamin K antagonist oral anticoagulants and warfarin in patients with atrial fibrillation: Propensity weighted nationwide cohort study. <i>BMJ</i> . 2016;353:i3189. doi:10.1136/bmj.i318                                                                                                                                                                                                                                                                                                                                                           |                  |                  |                  |                  |          |                  |       |      |      |      |      |      |                   |                  |                  |                  |                  |                  |
| Objective                                                                                                   | To evaluate the effectiveness and safety of the novel oral anticoagulants (dabigatran, rivaroxaban, and apixaban) vs warfarin in anticoagulant-naïve patients with atrial fibrillation                                                                                                                                                                                                                                                                                                                                                                                                                                                                   |                  |                  |                  |                  |          |                  |       |      |      |      |      |      |                   |                  |                  |                  |                  |                  |
| Country                                                                                                     | Denmark                                                                                                                                                                                                                                                                                                                                                                                                                                                                                                                                                                                                                                                  |                  |                  |                  |                  |          |                  |       |      |      |      |      |      |                   |                  |                  |                  |                  |                  |
| Design                                                                                                      | Nationwide cohort study                                                                                                                                                                                                                                                                                                                                                                                                                                                                                                                                                                                                                                  |                  |                  |                  |                  |          |                  |       |      |      |      |      |      |                   |                  |                  |                  |                  |                  |
| Data source                                                                                                 | Three Danish nationwide databases <ul style="list-style-type: none"><li>• Danish National Prescription Registry (with information on every drug prescriptions claimed since 1994)</li><li>• Danish National Patient Register (admission and discharge information [dates, discharge diagnoses] for more than 99% of hospital admissions since 1977)</li><li>• Danish Civil Registration System (with information on sex, date of birth, and vital and emigration status; all individuals in Denmark have a unique identification number)</li></ul>                                                                                                       |                  |                  |                  |                  |          |                  |       |      |      |      |      |      |                   |                  |                  |                  |                  |                  |
| Time period                                                                                                 | August 2011 to October 2015                                                                                                                                                                                                                                                                                                                                                                                                                                                                                                                                                                                                                              |                  |                  |                  |                  |          |                  |       |      |      |      |      |      |                   |                  |                  |                  |                  |                  |
| NOAC                                                                                                        | Apixaban 5 mg twice daily<br>Dabigatran 150 mg twice daily<br>Rivaroxaban 20 mg once daily                                                                                                                                                                                                                                                                                                                                                                                                                                                                                                                                                               |                  |                  |                  |                  |          |                  |       |      |      |      |      |      |                   |                  |                  |                  |                  |                  |
| Control                                                                                                     | Warfarin (2.5 mg dose tablets)                                                                                                                                                                                                                                                                                                                                                                                                                                                                                                                                                                                                                           |                  |                  |                  |                  |          |                  |       |      |      |      |      |      |                   |                  |                  |                  |                  |                  |
| Outcomes                                                                                                    | <b>Effectiveness</b><br>Ischemic stroke<br>Composite of ischemic stroke or systemic embolism<br>Death<br>Composite of ischemic stroke, systemic embolism, or death<br><b>Safety</b><br>Any bleeding<br>Intracranial bleeding<br>Major bleeding                                                                                                                                                                                                                                                                                                                                                                                                           |                  |                  |                  |                  |          |                  |       |      |      |      |      |      |                   |                  |                  |                  |                  |                  |
| Outcome definitions                                                                                         | Ischemic stroke: ICD-10 revision codes. This outcome has been validated, with a positive predictive value of more than 97%<br>Systemic embolism: ICD-10 revision codes<br>Bleeding events: intracranial, major, gastrointestinal, and traumatic intracranial<br>Major bleeding: extracranial bleeding with anemia, hemothorax, hematuria, epistaxis, and bleeding in the eye                                                                                                                                                                                                                                                                             |                  |                  |                  |                  |          |                  |       |      |      |      |      |      |                   |                  |                  |                  |                  |                  |
| Population (eligibility)                                                                                    | People diagnosed with atrial fibrillation with a first-time purchase of the NOAC of interest (to standard doses) or a new warfarin prescription during the study time period<br>Restriction to standard doses because patients who receive reduced dosage regimens have more comorbidities and are of a more advanced age (> 80 years)<br>Restriction to naïve patients (exclusion of patients who had used any oral anticoagulant within 1 year before the study period)<br>Exclusion of patients with valvular atrial fibrillation (mitral stenosis or mechanical heart valves) or venous thromboembolism (pulmonary embolism or deep vein thrombosis) |                  |                  |                  |                  |          |                  |       |      |      |      |      |      |                   |                  |                  |                  |                  |                  |
| Population (study sample)                                                                                   | <b>Study population</b><br>N = 61 678<br>Apixaban, n = 6349 (10%)<br>Dabigatran, n = 12 701 (21%)<br>Rivaroxaban, n = 7192 (12%)<br>Warfarin, n = 35 436 (57%)<br><b>Target population</b><br>N = 122 068 patients as new users of NOACS<br>Exclusion of 35 035 patients receiving 1 of the nonvitamin K antagonist oral anticoagulants with reduced doses and 25 355 patients with an indication for valvular atrial fibrillation or venous thromboembolism                                                                                                                                                                                             |                  |                  |                  |                  |          |                  |       |      |      |      |      |      |                   |                  |                  |                  |                  |                  |
| Population (baseline participant characteristics) (values expressed as percentages unless otherwise stated) |                                                                                                                                                                                                                                                                                                                                                                                                                                                                                                                                                                                                                                                          |                  |                  |                  |                  |          |                  |       |      |      |      |      |      |                   |                  |                  |                  |                  |                  |
|                                                                                                             | <table><tr><td></td><td>Apixaban</td><td>Dabigatran</td><td>Rivaroxaban</td><td>Warfarin</td><td>All participants</td></tr><tr><td>Women</td><td>39.7</td><td>33.9</td><td>43.1</td><td>41.2</td><td>39.8</td></tr><tr><td>Age, median (IQR)</td><td>71.3 (65.8-77.2)</td><td>67.6 (62.0-72.4)</td><td>71.8 (65.7-78.9)</td><td>72.4 (64.7-79.8)</td><td>70.9 (64.3-77.7)</td></tr></table>                                                                                                                                                                                                                                                              |                  | Apixaban         | Dabigatran       | Rivaroxaban      | Warfarin | All participants | Women | 39.7 | 33.9 | 43.1 | 41.2 | 39.8 | Age, median (IQR) | 71.3 (65.8-77.2) | 67.6 (62.0-72.4) | 71.8 (65.7-78.9) | 72.4 (64.7-79.8) | 70.9 (64.3-77.7) |
|                                                                                                             | Apixaban                                                                                                                                                                                                                                                                                                                                                                                                                                                                                                                                                                                                                                                 | Dabigatran       | Rivaroxaban      | Warfarin         | All participants |          |                  |       |      |      |      |      |      |                   |                  |                  |                  |                  |                  |
| Women                                                                                                       | 39.7                                                                                                                                                                                                                                                                                                                                                                                                                                                                                                                                                                                                                                                     | 33.9             | 43.1             | 41.2             | 39.8             |          |                  |       |      |      |      |      |      |                   |                  |                  |                  |                  |                  |
| Age, median (IQR)                                                                                           | 71.3 (65.8-77.2)                                                                                                                                                                                                                                                                                                                                                                                                                                                                                                                                                                                                                                         | 67.6 (62.0-72.4) | 71.8 (65.7-78.9) | 72.4 (64.7-79.8) | 70.9 (64.3-77.7) |          |                  |       |      |      |      |      |      |                   |                  |                  |                  |                  |                  |

|                                                                                                                                                                                                                                                                                                                                                                                                                             |                                                                                                                                                                                                                                                                                                                                                                                      |           |           |           |           |
|-----------------------------------------------------------------------------------------------------------------------------------------------------------------------------------------------------------------------------------------------------------------------------------------------------------------------------------------------------------------------------------------------------------------------------|--------------------------------------------------------------------------------------------------------------------------------------------------------------------------------------------------------------------------------------------------------------------------------------------------------------------------------------------------------------------------------------|-----------|-----------|-----------|-----------|
| >65 years                                                                                                                                                                                                                                                                                                                                                                                                                   | 78.2                                                                                                                                                                                                                                                                                                                                                                                 | 64.4      | 77.7      | 74.2      | 73.0      |
| >75 years                                                                                                                                                                                                                                                                                                                                                                                                                   | 33.7                                                                                                                                                                                                                                                                                                                                                                                 | 13.9      | 38.1      | 41.4      | 34.5      |
| >85 years                                                                                                                                                                                                                                                                                                                                                                                                                   | -                                                                                                                                                                                                                                                                                                                                                                                    | -         | -         | -         | -         |
| CHA <sub>2</sub> DS <sub>2</sub> VASc, mean (SD)                                                                                                                                                                                                                                                                                                                                                                            | 2.8 (1.6)                                                                                                                                                                                                                                                                                                                                                                            | 2.2 (1.4) | 2.8 (1.6) | 2.8 (1.7) | 2.7 (1.6) |
| HAS-BLED, mean (SD)                                                                                                                                                                                                                                                                                                                                                                                                         | 2.3 (1.2)                                                                                                                                                                                                                                                                                                                                                                            | 2.0 (1.1) | 2.2 (1.2) | 2.2 (1.2) | 2.2 (1.2) |
| Standard dose                                                                                                                                                                                                                                                                                                                                                                                                               | 100                                                                                                                                                                                                                                                                                                                                                                                  | 100       | 100       | 100       | 100       |
| Reduced dose                                                                                                                                                                                                                                                                                                                                                                                                                | -                                                                                                                                                                                                                                                                                                                                                                                    | -         | -         | -         | -         |
| Comorbidities                                                                                                                                                                                                                                                                                                                                                                                                               |                                                                                                                                                                                                                                                                                                                                                                                      |           |           |           |           |
| Ischemic stroke, or systemic embolism, or TIA                                                                                                                                                                                                                                                                                                                                                                               | 21.1                                                                                                                                                                                                                                                                                                                                                                                 | 13.2      | 16.8      | 14.8      | 15.3      |
| Heart failure                                                                                                                                                                                                                                                                                                                                                                                                               | 15.9                                                                                                                                                                                                                                                                                                                                                                                 | 9.3       | 12.6      | 10.4      | 11.0      |
| Myocardial infarction                                                                                                                                                                                                                                                                                                                                                                                                       | -                                                                                                                                                                                                                                                                                                                                                                                    | -         | -         | -         | -         |
| Vascular disease                                                                                                                                                                                                                                                                                                                                                                                                            | 13.9                                                                                                                                                                                                                                                                                                                                                                                 | 10.4      | 12.2      | 18.1      | 15.4      |
| Renal dysfunction                                                                                                                                                                                                                                                                                                                                                                                                           | 2.4                                                                                                                                                                                                                                                                                                                                                                                  | 1.1       | 1.8       | 6.6       | 4.5       |
| Previous bleeding                                                                                                                                                                                                                                                                                                                                                                                                           | 14.0                                                                                                                                                                                                                                                                                                                                                                                 | 9.9       | 12.8      | 11.8      | 11.8      |
| Hypertension                                                                                                                                                                                                                                                                                                                                                                                                                | 48.8                                                                                                                                                                                                                                                                                                                                                                                 | 47.0      | 48.6      | 50.6      | 49.4      |
| Diabetes                                                                                                                                                                                                                                                                                                                                                                                                                    | 15.8                                                                                                                                                                                                                                                                                                                                                                                 | 13.8      | 14.0      | 15.6      | 15.0      |
| Cancer                                                                                                                                                                                                                                                                                                                                                                                                                      | 16.1                                                                                                                                                                                                                                                                                                                                                                                 | 11.8      | 16.1      | 16.5      | 15.5      |
| Concomitant medication                                                                                                                                                                                                                                                                                                                                                                                                      |                                                                                                                                                                                                                                                                                                                                                                                      |           |           |           |           |
| Aspirin                                                                                                                                                                                                                                                                                                                                                                                                                     | 37.8                                                                                                                                                                                                                                                                                                                                                                                 | 38.2      | 38.3      | 42.0      | 40.4      |
| Beta-blocker                                                                                                                                                                                                                                                                                                                                                                                                                | 38.6                                                                                                                                                                                                                                                                                                                                                                                 | 40.1      | 38.9      | 41.0      | 40.3      |
| NSAID                                                                                                                                                                                                                                                                                                                                                                                                                       | 22.4                                                                                                                                                                                                                                                                                                                                                                                 | 24.5      | 22.1      | 24.3      | 23.9      |
| Calcium channel blocker                                                                                                                                                                                                                                                                                                                                                                                                     | -                                                                                                                                                                                                                                                                                                                                                                                    | -         | -         | -         | -         |
| Renin angiotensin system inhibitor                                                                                                                                                                                                                                                                                                                                                                                          | -                                                                                                                                                                                                                                                                                                                                                                                    | -         | -         | -         | -         |
| Analysis                                                                                                                                                                                                                                                                                                                                                                                                                    | Measure of the risk of an end point                                                                                                                                                                                                                                                                                                                                                  |           |           |           |           |
|                                                                                                                                                                                                                                                                                                                                                                                                                             | Crude incidence (number of events divided by person-time)                                                                                                                                                                                                                                                                                                                            |           |           |           |           |
|                                                                                                                                                                                                                                                                                                                                                                                                                             | Comparison of the risk of an end point between groups                                                                                                                                                                                                                                                                                                                                |           |           |           |           |
|                                                                                                                                                                                                                                                                                                                                                                                                                             | Time-to-event analysis (risk time from initial prescription until the relevant event, emigration, death, or end of follow-up)                                                                                                                                                                                                                                                        |           |           |           |           |
|                                                                                                                                                                                                                                                                                                                                                                                                                             | Intention-to-treat analysis for all end points                                                                                                                                                                                                                                                                                                                                       |           |           |           |           |
|                                                                                                                                                                                                                                                                                                                                                                                                                             | Cox regression (warfarin as the primary reference)                                                                                                                                                                                                                                                                                                                                   |           |           |           |           |
|                                                                                                                                                                                                                                                                                                                                                                                                                             | Confounding                                                                                                                                                                                                                                                                                                                                                                          |           |           |           |           |
|                                                                                                                                                                                                                                                                                                                                                                                                                             | Inverse probability of treatment weighted analysis                                                                                                                                                                                                                                                                                                                                   |           |           |           |           |
|                                                                                                                                                                                                                                                                                                                                                                                                                             | Generalized boosted models (based on 10 000 regression trees to calculate weights for the optimal balance between the treatment populations and obtain estimates representing population average treatment effects)                                                                                                                                                                  |           |           |           |           |
|                                                                                                                                                                                                                                                                                                                                                                                                                             | Propensity model including treatment predictors of age (continuous); binary indicators for sex; ischemic stroke or systemic embolism or transient ischemic attack; vascular disease; hypertension; diabetes; cancer; recent prescription of aspirin, beta-blockers, nonsteroidal anti-inflammatory drugs, or statins; and CHA <sub>2</sub> DS <sub>2</sub> -VASc and HAS-BLED scores |           |           |           |           |
| Graphical inspection of the weight distributions to evaluate the balance between treatment populations by standardized differences of all baseline covariates, using a threshold of 0.1 to indicate imbalance. Ordinary logistic regression to evaluate the association of baseline characteristics on treatment choice vs any of the alternatives                                                                          |                                                                                                                                                                                                                                                                                                                                                                                      |           |           |           |           |
| Sensitivity analysis                                                                                                                                                                                                                                                                                                                                                                                                        |                                                                                                                                                                                                                                                                                                                                                                                      |           |           |           |           |
| Analyses repeated by restriction to the cohort of patients with: <i>a</i> ) a hospital discharge diagnosis of atrial fibrillation either before or within 30 days of the first prescription of a NOAC; <i>b</i> ) dabigatran treatment postponed to February 2012; <i>c</i> ) populations younger and older than 65; <i>d</i> ) according to previous experience of stroke, systemic embolism, or transient ischemic attack |                                                                                                                                                                                                                                                                                                                                                                                      |           |           |           |           |
| Supplementary analyses                                                                                                                                                                                                                                                                                                                                                                                                      |                                                                                                                                                                                                                                                                                                                                                                                      |           |           |           |           |
| Continuous treatment analysis (censoring follow-up if the patient was prescribed another treatment than that initiated)                                                                                                                                                                                                                                                                                                     |                                                                                                                                                                                                                                                                                                                                                                                      |           |           |           |           |
| Software for statistical analysis                                                                                                                                                                                                                                                                                                                                                                                           |                                                                                                                                                                                                                                                                                                                                                                                      |           |           |           |           |
| Stata/MP version 14 and R version 3.1.1                                                                                                                                                                                                                                                                                                                                                                                     |                                                                                                                                                                                                                                                                                                                                                                                      |           |           |           |           |
| Statistical significance reference                                                                                                                                                                                                                                                                                                                                                                                          |                                                                                                                                                                                                                                                                                                                                                                                      |           |           |           |           |
| A 2-sided <i>P</i> value of less than .05                                                                                                                                                                                                                                                                                                                                                                                   |                                                                                                                                                                                                                                                                                                                                                                                      |           |           |           |           |
| IQR, interquartile range; NOACs, nonvitamin K antagonist oral anticoagulants; NSAIDs, nonsteroidal anti-inflammatory drugs; SD, standard deviation; TIA, transient ischemic attack                                                                                                                                                                                                                                          |                                                                                                                                                                                                                                                                                                                                                                                      |           |           |           |           |

|                                  |                                                                                                                                                                                                                                                                                                                                                                                                                                                                                                                                                                                                                                                                                                                                                                                                                                                                                                                                                                                                                                                                                                                                                   |
|----------------------------------|---------------------------------------------------------------------------------------------------------------------------------------------------------------------------------------------------------------------------------------------------------------------------------------------------------------------------------------------------------------------------------------------------------------------------------------------------------------------------------------------------------------------------------------------------------------------------------------------------------------------------------------------------------------------------------------------------------------------------------------------------------------------------------------------------------------------------------------------------------------------------------------------------------------------------------------------------------------------------------------------------------------------------------------------------------------------------------------------------------------------------------------------------|
| <b>Study ID</b>                  | Li et al. <sup>78</sup>                                                                                                                                                                                                                                                                                                                                                                                                                                                                                                                                                                                                                                                                                                                                                                                                                                                                                                                                                                                                                                                                                                                           |
| <b>Reference</b>                 | Li XS, Deitelzweig S, Keshishian A, Hamilton M, Horblyuk R, Gupta K, et al. Effectiveness and safety of apixaban versus warfarin in non-valvular atrial fibrillation patients in "real-world" clinical practice. A propensity-matched analysis of 76,940 patients. <i>Thromb Haemost.</i> 2017;117:1072-1082. doi:10.1160/TH17-01-0068                                                                                                                                                                                                                                                                                                                                                                                                                                                                                                                                                                                                                                                                                                                                                                                                            |
| <b>Objective</b>                 | To assess the effectiveness and safety of apixaban vs warfarin in nonvalvular atrial fibrillation patients in "real-world" clinical practice                                                                                                                                                                                                                                                                                                                                                                                                                                                                                                                                                                                                                                                                                                                                                                                                                                                                                                                                                                                                      |
| <b>Country</b>                   | United States                                                                                                                                                                                                                                                                                                                                                                                                                                                                                                                                                                                                                                                                                                                                                                                                                                                                                                                                                                                                                                                                                                                                     |
| <b>Design</b>                    | Retrospective cohort study                                                                                                                                                                                                                                                                                                                                                                                                                                                                                                                                                                                                                                                                                                                                                                                                                                                                                                                                                                                                                                                                                                                        |
| <b>Data source</b>               | <p>Four large, nationally-representative claims databases in the US:</p> <p>Two containing information from employer-provided health plans, with reported potential duplicates of only 0.5% in a study using both datasets:</p> <ul style="list-style-type: none"> <li>• Truven MarketScan® Commercial Claims Encounter and Medicare Supplemental and Coordination of Benefits Database ("MarketScan")</li> <li>• IMS PharMetrics Plus™ Database ("PharMetrics")</li> </ul> <p>Two containing information on beneficiaries from unique insurance plans, which guarantees no duplicates on the health plan level when pooled with other datasets:</p> <ul style="list-style-type: none"> <li>• Optum Clinformatics™ Data Mart ("Optum")</li> <li>• Humana Research Database ("Humana")</li> </ul> <p>The 4 datasets include claims from over 163 million members of commercial and Medicare Advantage/supplemental plans. The datasets contain information on patient demographics and enrollment history as well as medical claims from inpatient hospitals, outpatient hospitals, the emergency room, physician offices, and surgery centers</p> |
| <b>Time period</b>               | January 1, 2013 to September 30, 2015                                                                                                                                                                                                                                                                                                                                                                                                                                                                                                                                                                                                                                                                                                                                                                                                                                                                                                                                                                                                                                                                                                             |
| <b>NOAC</b>                      | <ul style="list-style-type: none"> <li>• Apixaban 5 mg</li> <li>• Apixaban 2.5 mg</li> </ul>                                                                                                                                                                                                                                                                                                                                                                                                                                                                                                                                                                                                                                                                                                                                                                                                                                                                                                                                                                                                                                                      |
| <b>Control</b>                   | Warfarin                                                                                                                                                                                                                                                                                                                                                                                                                                                                                                                                                                                                                                                                                                                                                                                                                                                                                                                                                                                                                                                                                                                                          |
| <b>Outcomes</b>                  | <p><b>Effectiveness</b></p> <p>Stroke/systemic embolism (SE):</p> <ul style="list-style-type: none"> <li>• Ischemic stroke,</li> <li>• Hemorrhagic stroke</li> <li>• SE</li> </ul> <p><b>Safety</b></p> <p>Major bleeding events:</p> <ul style="list-style-type: none"> <li>• Gastrointestinal (GI) bleeding</li> <li>• Intracranial hemorrhage (ICH)</li> <li>• Other major bleeding</li> </ul>                                                                                                                                                                                                                                                                                                                                                                                                                                                                                                                                                                                                                                                                                                                                                 |
| <b>Outcome definitions</b>       | Identified using the first-listed ICD-9-CM diagnosis of inpatient claims. The diagnosis codes used for stroke/SE and major bleeding were based on a validated administrative claim-based algorithm as well as the International Society on Thrombosis and Haemostasis definition of major bleeding, as used in the ARISTOTLE trial                                                                                                                                                                                                                                                                                                                                                                                                                                                                                                                                                                                                                                                                                                                                                                                                                |
| <b>Population (eligibility)</b>  | <p>NVAF patients who were aged <math>\geq 18</math> years and had <math>\geq 1</math> pharmacy claim for apixaban or warfarin during the identification were included in the study. AF patients were identified using ICD-9-CM code 427.31, a validated code used to identify AF patients with a median positive predictive value of 89%. The date of the first apixaban or warfarin pharmacy claim during the identification period was designated as the index date. Patients were required to have the AF diagnosis before or on the index date and have continuous medical and pharmacy health plan enrollment for <math>\geq 12</math> months prior to the index date</p> <p>Patients with evidence of valvular heart disease, venous thromboembolism, transient AF (pericarditis, hyperthyroidism, thyrotoxicity), or heart valve replacement/transplant during the 12 months prior to or on the index date, or with pregnancy during the study period were excluded. Patients treated with any OACs within 12 months before the index date or with <math>&gt; 1</math> OAC on the index date were also excluded</p>                        |
| <b>Population (study sample)</b> | <p><b>Study population</b></p> <p>N = 76 940</p> <p>Warfarin, n = 38 470</p> <p>Apixaban, n = 38 470</p> <p><b>Target population</b></p>                                                                                                                                                                                                                                                                                                                                                                                                                                                                                                                                                                                                                                                                                                                                                                                                                                                                                                                                                                                                          |

|                                                                                                                                                                     |                                                                                                                                                                                                                                                                                                                                                        |             |
|---------------------------------------------------------------------------------------------------------------------------------------------------------------------|--------------------------------------------------------------------------------------------------------------------------------------------------------------------------------------------------------------------------------------------------------------------------------------------------------------------------------------------------------|-------------|
|                                                                                                                                                                     | NVAF patients, N = 115 186<br>Apixaban, n = 41 867<br>Warfarin, n = 73 319                                                                                                                                                                                                                                                                             |             |
| Population (baseline participant characteristics) (values expressed as percentages unless otherwise stated)                                                         |                                                                                                                                                                                                                                                                                                                                                        |             |
|                                                                                                                                                                     | Apixaban                                                                                                                                                                                                                                                                                                                                               | Warfarin    |
| Women                                                                                                                                                               | 40.4                                                                                                                                                                                                                                                                                                                                                   | 40.2        |
| Age, mean (SD)                                                                                                                                                      | 70.9 (12.0)                                                                                                                                                                                                                                                                                                                                            | 70.9 (11.9) |
| >65-74 years                                                                                                                                                        | 27.7                                                                                                                                                                                                                                                                                                                                                   | 27.7        |
| ≥75 years                                                                                                                                                           | 40.7                                                                                                                                                                                                                                                                                                                                                   | 40.5        |
| >85 years                                                                                                                                                           | -                                                                                                                                                                                                                                                                                                                                                      | -           |
| CHA <sub>2</sub> DS <sub>2</sub> VASc, mean (SD)                                                                                                                    |                                                                                                                                                                                                                                                                                                                                                        |             |
| HAS-BLED, mean (SD)                                                                                                                                                 |                                                                                                                                                                                                                                                                                                                                                        |             |
| Standard dose                                                                                                                                                       |                                                                                                                                                                                                                                                                                                                                                        |             |
| Reduced dose                                                                                                                                                        |                                                                                                                                                                                                                                                                                                                                                        |             |
| Comorbidities                                                                                                                                                       |                                                                                                                                                                                                                                                                                                                                                        |             |
| Ischemic stroke, or systemic embolism, or TIA                                                                                                                       | -                                                                                                                                                                                                                                                                                                                                                      | -           |
| Stroke/SE                                                                                                                                                           | 10.2                                                                                                                                                                                                                                                                                                                                                   | 9.9         |
| Transient ischemic attack (TIA)                                                                                                                                     | 6.2                                                                                                                                                                                                                                                                                                                                                    | 6.1         |
| Congestive heart failure                                                                                                                                            | 24.2                                                                                                                                                                                                                                                                                                                                                   | 23.9        |
| Myocardial infarction                                                                                                                                               | 8.9                                                                                                                                                                                                                                                                                                                                                    | 8.8         |
| Vascular disease (see below)                                                                                                                                        | -                                                                                                                                                                                                                                                                                                                                                      | -           |
| Nonstroke/SE peripheral vascular disease                                                                                                                            | 45.1                                                                                                                                                                                                                                                                                                                                                   | 44.9        |
| Renal disease                                                                                                                                                       | 19.8                                                                                                                                                                                                                                                                                                                                                   | 19.9        |
| Previous bleeding                                                                                                                                                   | -                                                                                                                                                                                                                                                                                                                                                      | -           |
| Bleeding history                                                                                                                                                    | 16.6                                                                                                                                                                                                                                                                                                                                                   | 16.4        |
| Hypertension                                                                                                                                                        | 82.5                                                                                                                                                                                                                                                                                                                                                   | 82.3        |
| Diabetes mellitus                                                                                                                                                   | 32.5                                                                                                                                                                                                                                                                                                                                                   | 32.8        |
| Cancer                                                                                                                                                              | -                                                                                                                                                                                                                                                                                                                                                      | -           |
| Concomitant medication                                                                                                                                              |                                                                                                                                                                                                                                                                                                                                                        |             |
| Aspirin (see below)                                                                                                                                                 | -                                                                                                                                                                                                                                                                                                                                                      | -           |
| Antiplatelet                                                                                                                                                        | 15.8                                                                                                                                                                                                                                                                                                                                                   | 15.6        |
| Beta-blocker                                                                                                                                                        | 60.1                                                                                                                                                                                                                                                                                                                                                   | 59.8        |
| NSAID                                                                                                                                                               | 23.5                                                                                                                                                                                                                                                                                                                                                   | 23.3        |
| Calcium channel blocker                                                                                                                                             | -                                                                                                                                                                                                                                                                                                                                                      | -           |
| Renin angiotensin system inhibitor                                                                                                                                  | -                                                                                                                                                                                                                                                                                                                                                      | -           |
| Analysis                                                                                                                                                            | Measure of the risk of an end point                                                                                                                                                                                                                                                                                                                    |             |
|                                                                                                                                                                     | Cumulative incidence and hazard ratios                                                                                                                                                                                                                                                                                                                 |             |
|                                                                                                                                                                     | Comparison of the risk of an end point between groups                                                                                                                                                                                                                                                                                                  |             |
|                                                                                                                                                                     | Propensity score matching was conducted between the warfarin and apixaban cohorts. Patients were matched 1:1 within each dataset on the propensity scores generated by logistic regressions based on age, sex, geographic region, Charlson Comorbidity Index score, baseline bleeding and stroke/SE history, comorbidities, and baseline comedications |             |
|                                                                                                                                                                     | Cox proportional hazard models with robust sandwich estimates were performed to evaluate the risk of stroke/SE and major bleeding between the 2 matched cohorts                                                                                                                                                                                        |             |
|                                                                                                                                                                     | Sensitivity analysis                                                                                                                                                                                                                                                                                                                                   |             |
|                                                                                                                                                                     | A sensitivity analysis was conducted without restricting the follow-up period to 1 year. In this analysis, patients were not censored at the 1 year postindex date                                                                                                                                                                                     |             |
|                                                                                                                                                                     | Software for statistical analysis                                                                                                                                                                                                                                                                                                                      |             |
|                                                                                                                                                                     | STATinMED                                                                                                                                                                                                                                                                                                                                              |             |
|                                                                                                                                                                     | Statistical significance reference                                                                                                                                                                                                                                                                                                                     |             |
|                                                                                                                                                                     | P < .05 was considered statistically significant                                                                                                                                                                                                                                                                                                       |             |
| NSAIDs, nonsteroidal anti-inflammatory drugs; NVAF, nonvalvular atrial fibrillation; SD, standard deviation, SE, systemic embolism; TIA, transient ischemic attack. |                                                                                                                                                                                                                                                                                                                                                        |             |

|                                                                                                                    |                                                                                                                                                                                                                                                                                                                                                                                                                                                                                                                                                                                                                                                                                                                                     |             |             |             |             |             |             |          |       |      |      |      |      |      |      |                |             |             |             |             |             |             |           |   |   |   |   |   |   |           |   |   |   |   |   |   |
|--------------------------------------------------------------------------------------------------------------------|-------------------------------------------------------------------------------------------------------------------------------------------------------------------------------------------------------------------------------------------------------------------------------------------------------------------------------------------------------------------------------------------------------------------------------------------------------------------------------------------------------------------------------------------------------------------------------------------------------------------------------------------------------------------------------------------------------------------------------------|-------------|-------------|-------------|-------------|-------------|-------------|----------|-------|------|------|------|------|------|------|----------------|-------------|-------------|-------------|-------------|-------------|-------------|-----------|---|---|---|---|---|---|-----------|---|---|---|---|---|---|
| Study ID                                                                                                           | Lip et al. <sup>79</sup>                                                                                                                                                                                                                                                                                                                                                                                                                                                                                                                                                                                                                                                                                                            |             |             |             |             |             |             |          |       |      |      |      |      |      |      |                |             |             |             |             |             |             |           |   |   |   |   |   |   |           |   |   |   |   |   |   |
| Reference                                                                                                          | Lip GY, Keshishian A, Kamble S, Pan X, Mardekian J, Horblyuk R, Hamilton M. Real-world comparison of major bleeding risk among non-valvular atrial fibrillation patients initiated on apixaban, dabigatran, rivaroxaban, or warfarin. A propensity score matched analysis. <i>Thromb Haemost.</i> 2016;116:975-986. doi:10.1160/TH16-05-0403                                                                                                                                                                                                                                                                                                                                                                                        |             |             |             |             |             |             |          |       |      |      |      |      |      |      |                |             |             |             |             |             |             |           |   |   |   |   |   |   |           |   |   |   |   |   |   |
| Objective                                                                                                          | To assess major bleeding risks among newly anticoagulated NVAF patients who initiate warfarin, apixaban, dabigatran, or rivaroxaban when used in the “real world” clinical practice                                                                                                                                                                                                                                                                                                                                                                                                                                                                                                                                                 |             |             |             |             |             |             |          |       |      |      |      |      |      |      |                |             |             |             |             |             |             |           |   |   |   |   |   |   |           |   |   |   |   |   |   |
| Country                                                                                                            | United States                                                                                                                                                                                                                                                                                                                                                                                                                                                                                                                                                                                                                                                                                                                       |             |             |             |             |             |             |          |       |      |      |      |      |      |      |                |             |             |             |             |             |             |           |   |   |   |   |   |   |           |   |   |   |   |   |   |
| Design                                                                                                             | Retrospective cohort study                                                                                                                                                                                                                                                                                                                                                                                                                                                                                                                                                                                                                                                                                                          |             |             |             |             |             |             |          |       |      |      |      |      |      |      |                |             |             |             |             |             |             |           |   |   |   |   |   |   |           |   |   |   |   |   |   |
| Data source                                                                                                        | Truven MarketScan® Commercial Claims and Encounter and Medicare Supplemental and Coordination of Benefits Databases (containing medical and drug data for several million individuals annually, allowing for comprehensive longitudinal analysis)                                                                                                                                                                                                                                                                                                                                                                                                                                                                                   |             |             |             |             |             |             |          |       |      |      |      |      |      |      |                |             |             |             |             |             |             |           |   |   |   |   |   |   |           |   |   |   |   |   |   |
| Time period                                                                                                        | January 2012 to December 2014                                                                                                                                                                                                                                                                                                                                                                                                                                                                                                                                                                                                                                                                                                       |             |             |             |             |             |             |          |       |      |      |      |      |      |      |                |             |             |             |             |             |             |           |   |   |   |   |   |   |           |   |   |   |   |   |   |
| NOAC                                                                                                               | Apixaban 5 mg twice daily<br>Dabigatran 150 mg twice daily<br>Rivaroxaban 20 mg once daily                                                                                                                                                                                                                                                                                                                                                                                                                                                                                                                                                                                                                                          |             |             |             |             |             |             |          |       |      |      |      |      |      |      |                |             |             |             |             |             |             |           |   |   |   |   |   |   |           |   |   |   |   |   |   |
| Control                                                                                                            | Warfarin                                                                                                                                                                                                                                                                                                                                                                                                                                                                                                                                                                                                                                                                                                                            |             |             |             |             |             |             |          |       |      |      |      |      |      |      |                |             |             |             |             |             |             |           |   |   |   |   |   |   |           |   |   |   |   |   |   |
| Outcomes                                                                                                           | <b>Safety</b><br>Major bleeding                                                                                                                                                                                                                                                                                                                                                                                                                                                                                                                                                                                                                                                                                                     |             |             |             |             |             |             |          |       |      |      |      |      |      |      |                |             |             |             |             |             |             |           |   |   |   |   |   |   |           |   |   |   |   |   |   |
| Outcome definitions                                                                                                | Major bleeding was defined as bleeding requiring hospitalization during the period of drug use or within 30 days after the last day of supply of the treatment prescription<br>The definition of major bleeding was based on a published administrative claims-based algorithm as well as clinical trial definitions of major bleeding. This definition accounts for major bleeding at key sites including, but not limited to, intracranial, gastrointestinal, liver, splenic, and ocular hemorrhage requiring hospitalization with a diagnosis for bleeding                                                                                                                                                                       |             |             |             |             |             |             |          |       |      |      |      |      |      |      |                |             |             |             |             |             |             |           |   |   |   |   |   |   |           |   |   |   |   |   |   |
| Population (eligibility)                                                                                           | AF patients (ICD-9-CM codes: 427.31 or 427.32) ≥ 18 years who newly initiated OACs (warfarin, dabigatran, rivaroxaban, and apixaban) during the study period were included. The first OAC pharmacy claim date was designated as the index date. Patients with continuous health plan enrollment with medical and pharmacy benefits for at least 12 months before the index date (baseline period) were included in the study. Patients with a prescription claim for warfarin, rivaroxaban, dabigatran, or apixaban prior to the index date were excluded. Patients with evidence of transient AF (thyrotoxicosis, pericarditis), cardiac surgery, venous thromboembolism (VTE), valvular heart disease, or pregnancy were excluded |             |             |             |             |             |             |          |       |      |      |      |      |      |      |                |             |             |             |             |             |             |           |   |   |   |   |   |   |           |   |   |   |   |   |   |
| Population (study sample)                                                                                          | <b>Study population</b><br>Newly anticoagulated NVAF patients, N = 45 361<br>Warfarin, n = 15 461 (34.1%)<br>Apixaban, n = 7438 (16.4%)<br>Rivaroxaban, n = 17 801 (39.2%)<br>Dabigatran, n = 4661 (10.3%)<br><b>Target population</b><br>N = 101 138<br>Excluded: <ul style="list-style-type: none"><li>• Patients without AF or atrial flutter diagnosis at baseline, n = 14 214</li><li>• Restricted to age ≥ 18, n = 13</li><li>• Transient AF, n = 9962</li><li>• Patients with heart surgery, n = 2259</li><li>• Patients with VTE, n = 7002</li><li>• Patients with valvular heart disease, n = 22 255</li><li>• Pregnant patients, n = 54</li></ul>                                                                         |             |             |             |             |             |             |          |       |      |      |      |      |      |      |                |             |             |             |             |             |             |           |   |   |   |   |   |   |           |   |   |   |   |   |   |
| <b>Population (baseline participant characteristics)</b> (values expressed as percentages unless otherwise stated) |                                                                                                                                                                                                                                                                                                                                                                                                                                                                                                                                                                                                                                                                                                                                     |             |             |             |             |             |             |          |       |      |      |      |      |      |      |                |             |             |             |             |             |             |           |   |   |   |   |   |   |           |   |   |   |   |   |   |
|                                                                                                                    | <table><tr><td></td><td>Apixaban</td><td>Warfarin</td><td>Dabigatran</td><td>Warfarin</td><td>Rivaroxaban</td><td>Warfarin</td></tr><tr><td>Women</td><td>39.0</td><td>38.4</td><td>35.8</td><td>36.1</td><td>39.1</td><td>38.9</td></tr><tr><td>Age, mean (SD)</td><td>69.1 (12.3)</td><td>69.0 (12.3)</td><td>66.9 (12.2)</td><td>67.5 (12.3)</td><td>69.7 (11.9)</td><td>70.1 (12.0)</td></tr><tr><td>&gt;65 years</td><td>-</td><td>-</td><td>-</td><td>-</td><td>-</td><td>-</td></tr><tr><td>&gt;75 years</td><td>-</td><td>-</td><td>-</td><td>-</td><td>-</td><td>-</td></tr></table>                                                                                                                                       |             | Apixaban    | Warfarin    | Dabigatran  | Warfarin    | Rivaroxaban | Warfarin | Women | 39.0 | 38.4 | 35.8 | 36.1 | 39.1 | 38.9 | Age, mean (SD) | 69.1 (12.3) | 69.0 (12.3) | 66.9 (12.2) | 67.5 (12.3) | 69.7 (11.9) | 70.1 (12.0) | >65 years | - | - | - | - | - | - | >75 years | - | - | - | - | - | - |
|                                                                                                                    | Apixaban                                                                                                                                                                                                                                                                                                                                                                                                                                                                                                                                                                                                                                                                                                                            | Warfarin    | Dabigatran  | Warfarin    | Rivaroxaban | Warfarin    |             |          |       |      |      |      |      |      |      |                |             |             |             |             |             |             |           |   |   |   |   |   |   |           |   |   |   |   |   |   |
| Women                                                                                                              | 39.0                                                                                                                                                                                                                                                                                                                                                                                                                                                                                                                                                                                                                                                                                                                                | 38.4        | 35.8        | 36.1        | 39.1        | 38.9        |             |          |       |      |      |      |      |      |      |                |             |             |             |             |             |             |           |   |   |   |   |   |   |           |   |   |   |   |   |   |
| Age, mean (SD)                                                                                                     | 69.1 (12.3)                                                                                                                                                                                                                                                                                                                                                                                                                                                                                                                                                                                                                                                                                                                         | 69.0 (12.3) | 66.9 (12.2) | 67.5 (12.3) | 69.7 (11.9) | 70.1 (12.0) |             |          |       |      |      |      |      |      |      |                |             |             |             |             |             |             |           |   |   |   |   |   |   |           |   |   |   |   |   |   |
| >65 years                                                                                                          | -                                                                                                                                                                                                                                                                                                                                                                                                                                                                                                                                                                                                                                                                                                                                   | -           | -           | -           | -           | -           |             |          |       |      |      |      |      |      |      |                |             |             |             |             |             |             |           |   |   |   |   |   |   |           |   |   |   |   |   |   |
| >75 years                                                                                                          | -                                                                                                                                                                                                                                                                                                                                                                                                                                                                                                                                                                                                                                                                                                                                   | -           | -           | -           | -           | -           |             |          |       |      |      |      |      |      |      |                |             |             |             |             |             |             |           |   |   |   |   |   |   |           |   |   |   |   |   |   |

|                                                      |                                                                                                                                                                                                                                                                                                                                                                                                                                                                                                                                                                                                                                                                                                                                                                                                                                                                                                                                                                                                                                                                                                                                                                                                                                                                                                                                                                                                                                                                                                                                                                                                                                                             |           |           |           |           |           |
|------------------------------------------------------|-------------------------------------------------------------------------------------------------------------------------------------------------------------------------------------------------------------------------------------------------------------------------------------------------------------------------------------------------------------------------------------------------------------------------------------------------------------------------------------------------------------------------------------------------------------------------------------------------------------------------------------------------------------------------------------------------------------------------------------------------------------------------------------------------------------------------------------------------------------------------------------------------------------------------------------------------------------------------------------------------------------------------------------------------------------------------------------------------------------------------------------------------------------------------------------------------------------------------------------------------------------------------------------------------------------------------------------------------------------------------------------------------------------------------------------------------------------------------------------------------------------------------------------------------------------------------------------------------------------------------------------------------------------|-----------|-----------|-----------|-----------|-----------|
| >85 years                                            | -                                                                                                                                                                                                                                                                                                                                                                                                                                                                                                                                                                                                                                                                                                                                                                                                                                                                                                                                                                                                                                                                                                                                                                                                                                                                                                                                                                                                                                                                                                                                                                                                                                                           | -         | -         | -         | -         | -         |
| <b>CHA<sub>2</sub>DS<sub>2</sub>VASc</b> , mean (SD) | 2.9 (1.7)                                                                                                                                                                                                                                                                                                                                                                                                                                                                                                                                                                                                                                                                                                                                                                                                                                                                                                                                                                                                                                                                                                                                                                                                                                                                                                                                                                                                                                                                                                                                                                                                                                                   | 2.8 (1.6) | 2.6 (1.7) | 2.6 (1.7) | 2.9 (1.7) | 3.0 (1.6) |
| <b>Modified HAS-BLED</b> , mean (SD)                 | 2.2 (1.3)                                                                                                                                                                                                                                                                                                                                                                                                                                                                                                                                                                                                                                                                                                                                                                                                                                                                                                                                                                                                                                                                                                                                                                                                                                                                                                                                                                                                                                                                                                                                                                                                                                                   | 2.2 (1.2) | 2.0 (1.2) | 2.0 (1.2) | 2.2 (1.2) | 2.2 (1.2) |
| <b>Standard dose</b>                                 | 100                                                                                                                                                                                                                                                                                                                                                                                                                                                                                                                                                                                                                                                                                                                                                                                                                                                                                                                                                                                                                                                                                                                                                                                                                                                                                                                                                                                                                                                                                                                                                                                                                                                         | -         | 100       | -         | 100       | -         |
| <b>Reduced dose</b>                                  | -                                                                                                                                                                                                                                                                                                                                                                                                                                                                                                                                                                                                                                                                                                                                                                                                                                                                                                                                                                                                                                                                                                                                                                                                                                                                                                                                                                                                                                                                                                                                                                                                                                                           | -         | -         | -         | -         | -         |
| <b>Comorbidities</b>                                 |                                                                                                                                                                                                                                                                                                                                                                                                                                                                                                                                                                                                                                                                                                                                                                                                                                                                                                                                                                                                                                                                                                                                                                                                                                                                                                                                                                                                                                                                                                                                                                                                                                                             |           |           |           |           |           |
| Ischemic stroke, or systemic embolism, or TIA        | -                                                                                                                                                                                                                                                                                                                                                                                                                                                                                                                                                                                                                                                                                                                                                                                                                                                                                                                                                                                                                                                                                                                                                                                                                                                                                                                                                                                                                                                                                                                                                                                                                                                           | -         | -         | -         | -         | -         |
| Transient ischemic attack                            | 5.4                                                                                                                                                                                                                                                                                                                                                                                                                                                                                                                                                                                                                                                                                                                                                                                                                                                                                                                                                                                                                                                                                                                                                                                                                                                                                                                                                                                                                                                                                                                                                                                                                                                         | 5.4       | 4.5       | 3.8       | 5.11      | 5.25      |
| Ischemic stroke                                      | 8.4                                                                                                                                                                                                                                                                                                                                                                                                                                                                                                                                                                                                                                                                                                                                                                                                                                                                                                                                                                                                                                                                                                                                                                                                                                                                                                                                                                                                                                                                                                                                                                                                                                                         | 7.8       | 7.0       | 6.6       | 8.9       | 9.3       |
| Congestive heart failure                             | 20.1                                                                                                                                                                                                                                                                                                                                                                                                                                                                                                                                                                                                                                                                                                                                                                                                                                                                                                                                                                                                                                                                                                                                                                                                                                                                                                                                                                                                                                                                                                                                                                                                                                                        | 19.7      | 19.1      | 18.9      | 22.1      | 22.0      |
| Myocardial infarction                                | 6.5                                                                                                                                                                                                                                                                                                                                                                                                                                                                                                                                                                                                                                                                                                                                                                                                                                                                                                                                                                                                                                                                                                                                                                                                                                                                                                                                                                                                                                                                                                                                                                                                                                                         | 6.7       | 5.6       | 5.9       | 7.4       | 7.3       |
| Vascular disease (see below)                         | -                                                                                                                                                                                                                                                                                                                                                                                                                                                                                                                                                                                                                                                                                                                                                                                                                                                                                                                                                                                                                                                                                                                                                                                                                                                                                                                                                                                                                                                                                                                                                                                                                                                           | -         | -         | -         | -         | -         |
| Coronary artery disease                              | 32.6                                                                                                                                                                                                                                                                                                                                                                                                                                                                                                                                                                                                                                                                                                                                                                                                                                                                                                                                                                                                                                                                                                                                                                                                                                                                                                                                                                                                                                                                                                                                                                                                                                                        | 31.6      | 28.0      | 26.8      | 32.0      | 32.1      |
| Renal disease                                        | 9.0                                                                                                                                                                                                                                                                                                                                                                                                                                                                                                                                                                                                                                                                                                                                                                                                                                                                                                                                                                                                                                                                                                                                                                                                                                                                                                                                                                                                                                                                                                                                                                                                                                                         | 9.4       | 7.4       | 7.7       | 10.2      | 10.6      |
| Previous bleeding                                    | 14.1                                                                                                                                                                                                                                                                                                                                                                                                                                                                                                                                                                                                                                                                                                                                                                                                                                                                                                                                                                                                                                                                                                                                                                                                                                                                                                                                                                                                                                                                                                                                                                                                                                                        | 13.8      | 11.9      | 11.6      | 15.7      | 16.0      |
| Hypertension                                         | 74.3                                                                                                                                                                                                                                                                                                                                                                                                                                                                                                                                                                                                                                                                                                                                                                                                                                                                                                                                                                                                                                                                                                                                                                                                                                                                                                                                                                                                                                                                                                                                                                                                                                                        | 73.8      | 69.8      | 69.7      | 72.1      | 72.3      |
| Diabetes                                             | 28.8                                                                                                                                                                                                                                                                                                                                                                                                                                                                                                                                                                                                                                                                                                                                                                                                                                                                                                                                                                                                                                                                                                                                                                                                                                                                                                                                                                                                                                                                                                                                                                                                                                                        | 28.5      | 27.6      | 26.4      | 30.2      | 29.9      |
| Cancer                                               | -                                                                                                                                                                                                                                                                                                                                                                                                                                                                                                                                                                                                                                                                                                                                                                                                                                                                                                                                                                                                                                                                                                                                                                                                                                                                                                                                                                                                                                                                                                                                                                                                                                                           | -         | -         | -         | -         | -         |
| <b>Concomitant medication</b>                        |                                                                                                                                                                                                                                                                                                                                                                                                                                                                                                                                                                                                                                                                                                                                                                                                                                                                                                                                                                                                                                                                                                                                                                                                                                                                                                                                                                                                                                                                                                                                                                                                                                                             |           |           |           |           |           |
| Aspirin                                              | -                                                                                                                                                                                                                                                                                                                                                                                                                                                                                                                                                                                                                                                                                                                                                                                                                                                                                                                                                                                                                                                                                                                                                                                                                                                                                                                                                                                                                                                                                                                                                                                                                                                           | -         | -         | -         | -         | -         |
| Beta-blocker                                         | -                                                                                                                                                                                                                                                                                                                                                                                                                                                                                                                                                                                                                                                                                                                                                                                                                                                                                                                                                                                                                                                                                                                                                                                                                                                                                                                                                                                                                                                                                                                                                                                                                                                           | -         | -         | -         | -         | -         |
| NSAID                                                | -                                                                                                                                                                                                                                                                                                                                                                                                                                                                                                                                                                                                                                                                                                                                                                                                                                                                                                                                                                                                                                                                                                                                                                                                                                                                                                                                                                                                                                                                                                                                                                                                                                                           | -         | -         | -         | -         | -         |
| Calcium channel blocker                              | -                                                                                                                                                                                                                                                                                                                                                                                                                                                                                                                                                                                                                                                                                                                                                                                                                                                                                                                                                                                                                                                                                                                                                                                                                                                                                                                                                                                                                                                                                                                                                                                                                                                           | -         | -         | -         | -         | -         |
| Renin angiotensin system inhibitor                   | -                                                                                                                                                                                                                                                                                                                                                                                                                                                                                                                                                                                                                                                                                                                                                                                                                                                                                                                                                                                                                                                                                                                                                                                                                                                                                                                                                                                                                                                                                                                                                                                                                                                           | -         | -         | -         | -         | -         |
| <b>Analysis</b>                                      | <p><b>Measure of the risk of an end point</b></p> <p>The incidence rate of major bleeding was calculated as the number of first major bleeding events divided by the total time at risk for major bleeding within the study period and described as the number of bleeding events per 100 person-years</p> <p><b>Comparison of the risk of an end point between groups</b></p> <p>Propensity score matching pairwise comparisons were conducted between each cohort, matching NOACs to warfarin and also matching among NOACs. Propensity scores were estimated by unconditional logistic regression that incorporated potential predictors of treatment as independent variables in the regression, and group status (eg, apixaban initiators vs warfarin initiators) as the outcome</p> <p>The cumulative incidence of major bleeding was compared and presented using Kaplan-Meier curves. Cox proportional hazard models for the propensity score-matched cohorts were used to estimate the relative risk of major bleeding with 95% confidence intervals</p> <p><b>Confounding</b></p> <p>Propensity score matching was used to balance age, sex, region, baseline comorbidities, and comedications</p> <p><b>Sensitivity analysis</b></p> <p>Sensitivity analysis was conducted to test the robustness of the study results. Because a dose-based interaction effect may be observed with major bleeding, the treatment effect associated with risk of major bleeding was assessed among patients prescribed the standard dose for all OACs (warfarin, apixaban 5 mg twice daily, rivaroxaban 20 mg once daily, or dabigatran 150 mg twice daily)</p> |           |           |           |           |           |

|                                                                                                                                                                                                                               |                                                                                                                                                             |
|-------------------------------------------------------------------------------------------------------------------------------------------------------------------------------------------------------------------------------|-------------------------------------------------------------------------------------------------------------------------------------------------------------|
|                                                                                                                                                                                                                               | <b>Software for statistical analysis</b><br>SAS 9.3<br><b>Statistical significance reference</b><br><i>P</i> < .05 was considered statistically significant |
| NOACs, nonvitamin K antagonist oral anticoagulants; NSAIDs, nonsteroidal anti-inflammatory drugs; NVAf, nonvalvular atrial fibrillation; SD, standard deviation; TIA, transient ischemic attack; VTE, venous thromboembolism. |                                                                                                                                                             |

|                                  |                                                                                                                                                                                                                                                                                                                                                                                                                                                                                                                                                                                                                                                                                                                                                                                                                                                                                                                                                                                                                                                 |
|----------------------------------|-------------------------------------------------------------------------------------------------------------------------------------------------------------------------------------------------------------------------------------------------------------------------------------------------------------------------------------------------------------------------------------------------------------------------------------------------------------------------------------------------------------------------------------------------------------------------------------------------------------------------------------------------------------------------------------------------------------------------------------------------------------------------------------------------------------------------------------------------------------------------------------------------------------------------------------------------------------------------------------------------------------------------------------------------|
| <b>Study ID</b>                  | Nielsen et al. <sup>53</sup>                                                                                                                                                                                                                                                                                                                                                                                                                                                                                                                                                                                                                                                                                                                                                                                                                                                                                                                                                                                                                    |
| <b>Reference</b>                 | Nielsen PB, Skjøth F, Søgaard M, Kjældgaard JN, Lip GY, Larsen TB. Effectiveness and safety of reduced dose non-vitamin K antagonist oral anticoagulants and warfarin in patients with atrial fibrillation: propensity weighted nationwide cohort study. <i>BMJ</i> . 2017;356:j510. doi:10.1136/bmj.j510                                                                                                                                                                                                                                                                                                                                                                                                                                                                                                                                                                                                                                                                                                                                       |
| <b>Objective</b>                 | To examine the clinical effectiveness and safety of apixaban 2.5 mg, dabigatran 110 mg, and rivaroxaban 15 mg vs warfarin among patients with atrial fibrillation who had not previously taken an oral anticoagulant                                                                                                                                                                                                                                                                                                                                                                                                                                                                                                                                                                                                                                                                                                                                                                                                                            |
| <b>Country</b>                   | Denmark                                                                                                                                                                                                                                                                                                                                                                                                                                                                                                                                                                                                                                                                                                                                                                                                                                                                                                                                                                                                                                         |
| <b>Design</b>                    | Nationwide cohort study                                                                                                                                                                                                                                                                                                                                                                                                                                                                                                                                                                                                                                                                                                                                                                                                                                                                                                                                                                                                                         |
| <b>Data source</b>               | Three Danish nationwide administrative databases: <ul style="list-style-type: none"> <li>• The Danish National Prescription Registry (with information on purchase date, Anatomical Therapeutic Chemical classification code, and package size for every prescription claim since 1994)</li> <li>• The Danish Civil Registration System (with information on sex, date of birth, and vital and emigration status)</li> <li>• The Danish National Patient Register (admission/discharge date, and discharge International Classification of Diseases diagnosis codes for hospital admissions since 1977)</li> </ul>                                                                                                                                                                                                                                                                                                                                                                                                                              |
| <b>Time period</b>               | August 2011 to February 2016                                                                                                                                                                                                                                                                                                                                                                                                                                                                                                                                                                                                                                                                                                                                                                                                                                                                                                                                                                                                                    |
| <b>NOAC</b>                      | <ul style="list-style-type: none"> <li>• Dabigatran 110 mg twice daily</li> <li>• Rivaroxaban 15 mg once daily</li> <li>• Apixaban 2.5 mg twice daily</li> </ul>                                                                                                                                                                                                                                                                                                                                                                                                                                                                                                                                                                                                                                                                                                                                                                                                                                                                                |
| <b>Control</b>                   | Warfarin                                                                                                                                                                                                                                                                                                                                                                                                                                                                                                                                                                                                                                                                                                                                                                                                                                                                                                                                                                                                                                        |
| <b>Outcomes</b>                  | <b>Effectiveness</b> <ul style="list-style-type: none"> <li>• Combined ischemic stroke/systemic embolism</li> <li>• Ischemic stroke</li> <li>• All-cause mortality</li> </ul> <b>Safety</b> <ul style="list-style-type: none"> <li>• Hemorrhagic stroke</li> <li>• Major bleeding</li> <li>• Gastrointestinal bleeding</li> <li>• Composite of any bleeding events</li> </ul>                                                                                                                                                                                                                                                                                                                                                                                                                                                                                                                                                                                                                                                                   |
| <b>Outcome definitions</b>       | <p>End points were ascertained according to the International Classification of Disease, 10th revision (ICD-10)</p> <p>Major bleeding was defined as bleeding with anemia, hemothorax, hematuria, epistaxis, and bleeding in the eye</p>                                                                                                                                                                                                                                                                                                                                                                                                                                                                                                                                                                                                                                                                                                                                                                                                        |
| <b>Population (eligibility)</b>  | Eligible patients were identified as those with a first-time prescription claim for an NOAC, defined as apixaban (introduced December 10, 2012), dabigatran (introduced August 1, 2011), or rivaroxaban (introduced February 1, 2012), as well as individuals who started warfarin treatment (since August 1, 2011) up to February 28, 2016. Patients who had taken any oral anticoagulant within the previous year were excluded to establish a naïve cohort. All NOACs were restricted to reduced doses approved for stroke prevention in atrial fibrillation (in Europe) as follows: apixaban 2.5 mg, dabigatran 110 mg, and rivaroxaban 15 mg. To focus on nonvalvular atrial fibrillation, patients with previous hospital diagnoses indicating valvular atrial fibrillation (mitral stenosis or mechanical heart valves) were excluded. All patients with an indication for oral anticoagulant treatment other than atrial fibrillation (history of pulmonary embolism, deep venous thrombosis, or recent hip/knee surgery) were excluded |
| <b>Population (study sample)</b> | <b>Study population</b><br>N = 55 644<br>69.9% warfarin<br>7.9% apixaban<br>15.9% dabigatran<br>6.3% rivaroxaban<br><b>Target population</b><br>N = 88 141<br>Excluded: <ul style="list-style-type: none"> <li>• Oral anticoagulant treatment other than atrial fibrillation, n = 31 852</li> </ul>                                                                                                                                                                                                                                                                                                                                                                                                                                                                                                                                                                                                                                                                                                                                             |



|                                                                                                                                                                                                       |                                                                                                                                                                                                                                                                           |                                                  |                                              |                          |           |
|-------------------------------------------------------------------------------------------------------------------------------------------------------------------------------------------------------|---------------------------------------------------------------------------------------------------------------------------------------------------------------------------------------------------------------------------------------------------------------------------|--------------------------------------------------|----------------------------------------------|--------------------------|-----------|
|                                                                                                                                                                                                       | • Previous use of phenprocoumon within the past year for unknown reasons, n = 645                                                                                                                                                                                         |                                                  |                                              |                          |           |
| Population (baseline participant characteristics) (values expressed as percentages unless otherwise stated)                                                                                           |                                                                                                                                                                                                                                                                           |                                                  |                                              |                          |           |
|                                                                                                                                                                                                       | Apixaban<br>2.5 mg<br>twice/day<br>(n = 4400)                                                                                                                                                                                                                             | Dabigatran<br>110 mg<br>twice/<br>day (n = 8875) | Rivaroxaban<br>15 mg once/<br>day (n = 3476) | Warfarin<br>(n = 38 893) | All       |
| Women                                                                                                                                                                                                 | 60.6                                                                                                                                                                                                                                                                      | 53.7                                             | 53.2                                         | 40.4                     | 44.9      |
| Age, mean (SD)                                                                                                                                                                                        | 83.9                                                                                                                                                                                                                                                                      | 79.9                                             | 77.9                                         | 71.0                     | 73.9      |
| ≥65 years                                                                                                                                                                                             | 97.2                                                                                                                                                                                                                                                                      | 93.6                                             | 85.7                                         | 74.6                     | 80.1      |
| ≥75 years                                                                                                                                                                                             | 88.1                                                                                                                                                                                                                                                                      | 78.1                                             | 66.8                                         | 41.3                     | 52.5      |
| ≥85 years                                                                                                                                                                                             | 48.3                                                                                                                                                                                                                                                                      | 28.4                                             | 35.2                                         | 11.1                     | 18.3      |
| CHA <sub>2</sub> DS <sub>2</sub> VASc, mean (SD)                                                                                                                                                      | 4.3 (1.5)                                                                                                                                                                                                                                                                 | 3.8 (1.5)                                        | 3.6 (1.8)                                    | 3.0 (1.7)                | 3.3 (1.7) |
| HAS-BLED, mean (SD)                                                                                                                                                                                   | 2.8 (1.1)                                                                                                                                                                                                                                                                 | 2.7 (1.0)                                        | 2.5 (1.2)                                    | 2.4 (1.2)                | 2.4 (1.2) |
| Standard dose                                                                                                                                                                                         | -                                                                                                                                                                                                                                                                         | -                                                | -                                            | -                        | -         |
| Reduced dose                                                                                                                                                                                          | 100                                                                                                                                                                                                                                                                       | 100                                              | 100                                          | -                        | 100       |
| Comorbidities                                                                                                                                                                                         |                                                                                                                                                                                                                                                                           |                                                  |                                              |                          |           |
| Previous ischemic stroke                                                                                                                                                                              | 22.9                                                                                                                                                                                                                                                                      | 16.0                                             | 15.2                                         | 11.0                     | 13.0      |
| Ischemic heart disease                                                                                                                                                                                | 29.9                                                                                                                                                                                                                                                                      | 26.3                                             | 26.7                                         | 26.8                     | 27.0      |
| Heart failure/LVD                                                                                                                                                                                     | 20.3                                                                                                                                                                                                                                                                      | 15.5                                             | 18.9                                         | 15.5                     | 16.1      |
| Myocardial infarction                                                                                                                                                                                 | -                                                                                                                                                                                                                                                                         | -                                                | -                                            | -                        | -         |
| Vascular disease                                                                                                                                                                                      | 22.0                                                                                                                                                                                                                                                                      | 17.7                                             | 18.2                                         | 19.0                     | 19.0      |
| Renal dysfunction                                                                                                                                                                                     | 9.5                                                                                                                                                                                                                                                                       | 3.9                                              | 9.1                                          | 8.3                      | 7.8       |
| Previous bleeding                                                                                                                                                                                     | 17.3                                                                                                                                                                                                                                                                      | 14.3                                             | 15.0                                         | 11.4                     | 12.5      |
| Hypertension                                                                                                                                                                                          | 63.5                                                                                                                                                                                                                                                                      | 64.0                                             | 58.1                                         | 60.3                     | 61.0      |
| Diabetes                                                                                                                                                                                              | 17.3                                                                                                                                                                                                                                                                      | 14.9                                             | 16.5                                         | 16.3                     | 16.1      |
| Cancer                                                                                                                                                                                                | 22.2                                                                                                                                                                                                                                                                      | 18.3                                             | 20.0                                         | 16.7                     | 17.6      |
| Concomitant medication                                                                                                                                                                                |                                                                                                                                                                                                                                                                           |                                                  |                                              |                          |           |
| Aspirin                                                                                                                                                                                               | 48.2                                                                                                                                                                                                                                                                      | 50.3                                             | 44.4                                         | 46.8                     | 47.3      |
| Beta-blocker                                                                                                                                                                                          | 60.0                                                                                                                                                                                                                                                                      | 62.1                                             | 50.5                                         | 63.0                     | 61.9      |
| NSAID                                                                                                                                                                                                 | 18.5                                                                                                                                                                                                                                                                      | 24.5                                             | 21.8                                         | 24.4                     | 23.7      |
| Calcium channel blocker                                                                                                                                                                               | 33.8                                                                                                                                                                                                                                                                      | 35.6                                             | 30.5                                         | 33.1                     | 33.4      |
| Renin angiotensin system inhibitor                                                                                                                                                                    | -                                                                                                                                                                                                                                                                         | -                                                | -                                            | -                        | -         |
| Analysis                                                                                                                                                                                              | Measure of the risk of an end point                                                                                                                                                                                                                                       |                                                  |                                              |                          |           |
|                                                                                                                                                                                                       | Cumulative incidence rates (calculated as number of events divided by person-time)                                                                                                                                                                                        |                                                  |                                              |                          |           |
|                                                                                                                                                                                                       | Comparison of the risk of an end point between groups                                                                                                                                                                                                                     |                                                  |                                              |                          |           |
|                                                                                                                                                                                                       | Person-years of follow-up were calculated from the date of first prescription claim to the occurrence of the first end point (death, emigration, or end of follow-up), whichever came first                                                                               |                                                  |                                              |                          |           |
|                                                                                                                                                                                                       | Cox regression (warfarin as the primary reference)                                                                                                                                                                                                                        |                                                  |                                              |                          |           |
|                                                                                                                                                                                                       | Failure curves were used to depict how risks of events evolved over time. Specifically, the Aalen-Johansen estimator was used to calculate absolute risk of events taking into account the competing risk of death and the Kaplan-Meier estimator for all-cause mortality |                                                  |                                              |                          |           |
|                                                                                                                                                                                                       | Confounding                                                                                                                                                                                                                                                               |                                                  |                                              |                          |           |
|                                                                                                                                                                                                       | Applied an inverse probability of treatment weighted approach                                                                                                                                                                                                             |                                                  |                                              |                          |           |
|                                                                                                                                                                                                       | Sensitivity analysis                                                                                                                                                                                                                                                      |                                                  |                                              |                          |           |
|                                                                                                                                                                                                       | Ordinary crude and Cox multivariate adjusted analysis to compare the results obtained from the weighted analyses                                                                                                                                                          |                                                  |                                              |                          |           |
|                                                                                                                                                                                                       | Standardized morbidity ratio weights to address the (hypothetical) casual situation of all patients receiving warfarin treatment rather than an NOAC                                                                                                                      |                                                  |                                              |                          |           |
|                                                                                                                                                                                                       | Supplementary analyses                                                                                                                                                                                                                                                    |                                                  |                                              |                          |           |
|                                                                                                                                                                                                       | Supplemented the main analysis by a sensitivity analysis stratified by age category—for instance, age ≥ 80 years                                                                                                                                                          |                                                  |                                              |                          |           |
| Sensitivity analysis restricted to patients with a hospital diagnosis of atrial fibrillation to increase the likelihood of the treatment indication                                                   |                                                                                                                                                                                                                                                                           |                                                  |                                              |                          |           |
| Repeated the main analysis confined to the time period where all 3 NOACs were available in Denmark—that is, from 12 December 2012, when apixaban (the latest market drug) became available in Denmark |                                                                                                                                                                                                                                                                           |                                                  |                                              |                          |           |

|                                                                                                                                                              |                                                                                                                                                                                                                                      |
|--------------------------------------------------------------------------------------------------------------------------------------------------------------|--------------------------------------------------------------------------------------------------------------------------------------------------------------------------------------------------------------------------------------|
|                                                                                                                                                              | <b>Software for statistical analysis</b><br>Stata version 14 (StataCorp) and R version 3.1.1 (R Foundation for Statistical Computing)<br><b>Statistical significance reference</b><br>A 2-sided $P < .05$ was considered significant |
| LVD, left ventricular dysfunction; NOACs, nonvitamin K antagonist oral anticoagulants; NSAIDs, nonsteroidal anti-inflammatory drugs; SD, standard deviation. |                                                                                                                                                                                                                                      |

|                                                                                                                                  |                                                                                                                                                                                                                                                                                                                            |
|----------------------------------------------------------------------------------------------------------------------------------|----------------------------------------------------------------------------------------------------------------------------------------------------------------------------------------------------------------------------------------------------------------------------------------------------------------------------|
| Study ID                                                                                                                         | Nishtala et al. <sup>80</sup>                                                                                                                                                                                                                                                                                              |
| Reference                                                                                                                        | Nishtala PS, Gnjjidic D, Jamieson HA, Hanger HC, Kaluarachchi C, Hilmer SN. 'Real-world' haemorrhagic rates for warfarin and dabigatran using population-level data in New Zealand. <i>Int J Cardiol.</i> 2016;203:746-752. doi:10.1016/j.ijcard.2015.11.067                                                               |
| Objective                                                                                                                        | To examine the risk of hemorrhage in a large population-based cohort of older individuals with atrial fibrillation (AF) who recently commenced treatment with warfarin or dabigatran and to compare the risk of hemorrhage with varying doses of dabigatran with warfarin, controlling for comorbidities                   |
| Country                                                                                                                          | New Zealand                                                                                                                                                                                                                                                                                                                |
| Design                                                                                                                           | Nationwide cohort study                                                                                                                                                                                                                                                                                                    |
| Data source                                                                                                                      | The National Minimum Dataset, which is a collection of all public and private hospital discharge information, including data on inpatients and day patient stays. These data were linked to those on prescriptions, diagnoses, and mortality, provided by the Ministry of Health                                           |
| Time period                                                                                                                      | July 2011 to December 2011 but hospital admission records were retrieved up to December 2012                                                                                                                                                                                                                               |
| NOAC                                                                                                                             | Dabigatran 300 mg or 220 mg or 150 mg daily                                                                                                                                                                                                                                                                                |
| Control                                                                                                                          | Warfarin                                                                                                                                                                                                                                                                                                                   |
| Outcomes                                                                                                                         | <b>Effectiveness</b><br>None<br><b>Safety</b><br>Bleeding<br>Mortality                                                                                                                                                                                                                                                     |
| Outcome definitions                                                                                                              | Any admission to hospital for hemorrhage while taking dabigatran or warfarin                                                                                                                                                                                                                                               |
| Population (eligibility)                                                                                                         | Individuals prescribed dabigatran or warfarin during the study period<br>Excluded:<br>Those prescribed warfarin during 18 months prior to the study and those who switched between the 2 drugs<br>Age < 65 years<br>Additionally, those prescribed dabigatran 150 mg daily (low dose) were excluded from the second cohort |
| Population (study sample)                                                                                                        | <b>Study population</b><br>N = 12 842<br>Warfarin, n = 7079 (51.6%)<br>Dabigatran, n = 5763 (42.1%)<br><b>Target population</b><br>23 583 new users of all ages, of whom 10 741 met the above exclusion criteria and were excluded                                                                                         |
| <b>Population (baseline participant characteristics)</b> (values expressed as percentages unless otherwise stated)               |                                                                                                                                                                                                                                                                                                                            |
|                                                                                                                                  | <b>Apixaban</b> <b>Dabigatran</b> <b>Rivaroxaban</b> <b>Warfarin</b> <b>All participants</b>                                                                                                                                                                                                                               |
| <b>Women</b>                                                                                                                     | -46.9-48.047.3                                                                                                                                                                                                                                                                                                             |
| <b>Age, mean (SD)</b>                                                                                                            | -77.3 (6.4)-77.4 (6.6)-                                                                                                                                                                                                                                                                                                    |
| >65 years                                                                                                                        | ---                                                                                                                                                                                                                                                                                                                        |
| >75 years                                                                                                                        | ----                                                                                                                                                                                                                                                                                                                       |
| >85 years                                                                                                                        | ----                                                                                                                                                                                                                                                                                                                       |
| <b>CHA<sub>2</sub>DS<sub>2</sub>VASc, mean (SD)</b>                                                                              | -----                                                                                                                                                                                                                                                                                                                      |
| <b>HAS-BLED, mean (SD)</b>                                                                                                       | -----                                                                                                                                                                                                                                                                                                                      |
| <b>Standard dose</b> (for dabigatran, all doses, ie, 300 mg, 210 mg, or 150 mg daily were considered standard, depending on age) | -100--                                                                                                                                                                                                                                                                                                                     |
| <b>Reduced dose</b>                                                                                                              | -----                                                                                                                                                                                                                                                                                                                      |
| <b>Comorbidities</b>                                                                                                             |                                                                                                                                                                                                                                                                                                                            |
| Ischemic stroke, or systemic embolism, or TIA                                                                                    | -18.8-19.419.1                                                                                                                                                                                                                                                                                                             |
| Heart failure                                                                                                                    | -22.4-21.922.2                                                                                                                                                                                                                                                                                                             |
| Myocardial infarction                                                                                                            | -13.0-13.613.3                                                                                                                                                                                                                                                                                                             |
| Vascular disease                                                                                                                 | -2.8-2.82.8                                                                                                                                                                                                                                                                                                                |

|                                                                                                                                                           |                                                                                                                                                                                                                                                                                                                                |      |   |      |      |
|-----------------------------------------------------------------------------------------------------------------------------------------------------------|--------------------------------------------------------------------------------------------------------------------------------------------------------------------------------------------------------------------------------------------------------------------------------------------------------------------------------|------|---|------|------|
| Renal dysfunction                                                                                                                                         | -                                                                                                                                                                                                                                                                                                                              | 7.6  | - | 7.2  | 7.4  |
| Previous bleeding                                                                                                                                         | -                                                                                                                                                                                                                                                                                                                              | -    | - | -    | -    |
| Hypertension                                                                                                                                              | -                                                                                                                                                                                                                                                                                                                              | -    | - | -    | -    |
| Diabetes                                                                                                                                                  | -                                                                                                                                                                                                                                                                                                                              | 15.6 | - | 15.9 | 15.7 |
| Cancer                                                                                                                                                    | -                                                                                                                                                                                                                                                                                                                              | 3.6  | - | 3.5  | 3.5  |
| <b>Concomitant medication</b>                                                                                                                             |                                                                                                                                                                                                                                                                                                                                |      |   |      |      |
| Aspirin                                                                                                                                                   | -                                                                                                                                                                                                                                                                                                                              | 71.5 | - | 70.4 | 70.9 |
| Beta-blocker                                                                                                                                              | -                                                                                                                                                                                                                                                                                                                              | -    | - | -    | -    |
| NSAID                                                                                                                                                     | -                                                                                                                                                                                                                                                                                                                              | -    | - | -    | -    |
| Calcium channel blocker                                                                                                                                   | -                                                                                                                                                                                                                                                                                                                              | 2.7  | - | 2.1  | 2.4  |
| Renin angiotensin system inhibitor                                                                                                                        | -                                                                                                                                                                                                                                                                                                                              | -    | - | -    | -    |
| <b>Analysis</b>                                                                                                                                           | <b>Measure of the risk of an end point</b>                                                                                                                                                                                                                                                                                     |      |   |      |      |
|                                                                                                                                                           | Bleeding rates per person-year                                                                                                                                                                                                                                                                                                 |      |   |      |      |
|                                                                                                                                                           | <b>Comparison of the risk of an end point between groups</b>                                                                                                                                                                                                                                                                   |      |   |      |      |
|                                                                                                                                                           | Two propensity score-matched cohort were created: the first was based on drug type (ie, dabigatran vs warfarin, binary matching), and the second was based on drug type and the 2 dosages of dabigatran (ie, 300 mg and 220 mg daily, nonbinary matching), creating 2 groups of dabigatran users and 1 group of warfarin users |      |   |      |      |
|                                                                                                                                                           | Cox proportional hazards models were used to compare adjusted hazard ratios of bleeding in the 2 matched cohorts                                                                                                                                                                                                               |      |   |      |      |
|                                                                                                                                                           | <b>Confounding</b>                                                                                                                                                                                                                                                                                                             |      |   |      |      |
|                                                                                                                                                           | The 2 cohorts were matched by propensity score, derived from age, sex, ethnicity, chronic disease score, impaired renal function, other comorbidities, and medication use                                                                                                                                                      |      |   |      |      |
|                                                                                                                                                           | <b>Sensitivity analysis</b>                                                                                                                                                                                                                                                                                                    |      |   |      |      |
|                                                                                                                                                           | Analyses according to different persistence levels (prescription gaps of 30 days vs 60 days)                                                                                                                                                                                                                                   |      |   |      |      |
|                                                                                                                                                           | <b>Supplementary analyses</b>                                                                                                                                                                                                                                                                                                  |      |   |      |      |
| Subgroup analysis of mortality in the first cohort (ie, dabigatran vs warfarin)                                                                           |                                                                                                                                                                                                                                                                                                                                |      |   |      |      |
| <b>Software for statistical analysis</b>                                                                                                                  |                                                                                                                                                                                                                                                                                                                                |      |   |      |      |
| SPSS (IBM SPSS Statistics) version 22 and R statistics software version 3.1.2                                                                             |                                                                                                                                                                                                                                                                                                                                |      |   |      |      |
| <b>Statistical significance reference</b>                                                                                                                 |                                                                                                                                                                                                                                                                                                                                |      |   |      |      |
| Not stated                                                                                                                                                |                                                                                                                                                                                                                                                                                                                                |      |   |      |      |
| NOACs, nonvitamin K antagonist oral anticoagulants; NSAIDs, nonsteroidal anti-inflammatory drugs; SD, standard deviation; TIA, transient ischemic attack. |                                                                                                                                                                                                                                                                                                                                |      |   |      |      |

|                                                                                                                    |                                                                                                                                                                                                                                                                                                                                                                                                                                                                                                                                                                                                                                                                                |
|--------------------------------------------------------------------------------------------------------------------|--------------------------------------------------------------------------------------------------------------------------------------------------------------------------------------------------------------------------------------------------------------------------------------------------------------------------------------------------------------------------------------------------------------------------------------------------------------------------------------------------------------------------------------------------------------------------------------------------------------------------------------------------------------------------------|
| Study ID                                                                                                           | Noseworthy et al. <sup>81</sup>                                                                                                                                                                                                                                                                                                                                                                                                                                                                                                                                                                                                                                                |
| Reference                                                                                                          | Noseworthy PA, Yao X, Abraham NS, Sangaralingham LR, McBane RD, Shah ND. Direct comparison of dabigatran, rivaroxaban, and apixaban for effectiveness and safety in nonvalvular atrial fibrillation. <i>Chest</i> . 2016;150:1302-1312. doi:10.1016/j.chest.2016.07.013                                                                                                                                                                                                                                                                                                                                                                                                        |
| Objective                                                                                                          | To compare the effectiveness and safety of dabigatran, rivaroxaban, and apixaban in clinical practice                                                                                                                                                                                                                                                                                                                                                                                                                                                                                                                                                                          |
| Country                                                                                                            | United States                                                                                                                                                                                                                                                                                                                                                                                                                                                                                                                                                                                                                                                                  |
| Design                                                                                                             | Retrospective analysis using administrative claims data                                                                                                                                                                                                                                                                                                                                                                                                                                                                                                                                                                                                                        |
| Data source                                                                                                        | The American administrative claims database Optum Labs Data Warehouse (OLDW). The OLDW contains more than 100 million privately insured and Medicare Advantage enrollees from the last 20 years throughout the US, with greatest representation from the South and Midwest                                                                                                                                                                                                                                                                                                                                                                                                     |
| Time period                                                                                                        | October 2010 to February 2015                                                                                                                                                                                                                                                                                                                                                                                                                                                                                                                                                                                                                                                  |
| NOAC                                                                                                               | Dabigatran<br>Rivaroxaban<br>Apixaban                                                                                                                                                                                                                                                                                                                                                                                                                                                                                                                                                                                                                                          |
| Control<br>(pairwise comparisons)                                                                                  | Dabigatran<br>Rivaroxaban<br>Apixaban                                                                                                                                                                                                                                                                                                                                                                                                                                                                                                                                                                                                                                          |
| Outcomes                                                                                                           | <b>Effectiveness</b><br>First inpatient admission for stroke or systemic embolism, including ischemic stroke, hemorrhagic stroke, and systemic embolism<br><b>Safety</b><br>First inpatient admission for major bleeding, which included gastrointestinal bleeding, intracranial bleeding, and bleeding from other sites<br>The secondary outcomes were ischemic stroke, hemorrhagic stroke, and intracranial bleeding                                                                                                                                                                                                                                                         |
| Outcome definitions                                                                                                | In the Supplementary Material, not available                                                                                                                                                                                                                                                                                                                                                                                                                                                                                                                                                                                                                                   |
| Population (eligibility)                                                                                           | All adult users (≥ 18 years) of dabigatran, rivaroxaban, and apixaban for nonvalvular atrial fibrillation<br>At least a 12-month continuous enrollment in both medical and pharmaceutical health plans prior to the index date, defined as the baseline period<br>At least 1 inpatient or outpatient AF diagnosis (International Classification of Diseases, 9th Revision, Clinical Modification diagnosis 427.31) at baseline<br><b>Exclusion criteria:</b><br>Patients who only had a diagnosis of atrial flutter but no diagnosis of atrial fibrillation at baseline were excluded<br>Patients who had valvular heart disease, dialysis, or kidney transplant were excluded |
| Population<br>(study sample)                                                                                       | <b>Study population</b> , difficult to define because of overlaps between the cohorts<br>The rivaroxaban and dabigatran cohort, N = 31 574<br>The apixaban and dabigatran cohort, N = 13 084<br>The apixaban and rivaroxaban cohort, N = 13 130<br><b>Target population</b><br>Not explicitly defined                                                                                                                                                                                                                                                                                                                                                                          |
| <b>Population (baseline participant characteristics)</b> (values expressed as percentages unless otherwise stated) |                                                                                                                                                                                                                                                                                                                                                                                                                                                                                                                                                                                                                                                                                |
|                                                                                                                    | <b>Rivaroxaban<br/>(N = 15 787)</b> <b>Dabigatran<br/>(N = 15 787)</b> <b>Apixaban<br/>(N = 6542)</b> <b>Dabigatran<br/>(N = 6542)</b> <b>Apixaban<br/>(N = 6565)</b> <b>Rivaroxaban<br/>(N = 6565)</b>                                                                                                                                                                                                                                                                                                                                                                                                                                                                        |
| <b>Women</b>                                                                                                       | 40.341.145.946.146.0                                                                                                                                                                                                                                                                                                                                                                                                                                                                                                                                                                                                                                                           |
| <b>Age</b> , median (IQR)                                                                                          | 70 (62-78)71 (62-78)73 (65-81)73 (65-81)73 (65-81)73 (65-81)                                                                                                                                                                                                                                                                                                                                                                                                                                                                                                                                                                                                                   |
| >65 years                                                                                                          | 66.468.175.975.57675.2                                                                                                                                                                                                                                                                                                                                                                                                                                                                                                                                                                                                                                                         |
| >75 years                                                                                                          | 35.237.045.545.447.545.5                                                                                                                                                                                                                                                                                                                                                                                                                                                                                                                                                                                                                                                       |
| >85 years                                                                                                          | . . . . .                                                                                                                                                                                                                                                                                                                                                                                                                                                                                                                                                                                                                                                                      |
| <b>CHA<sub>2</sub>DS<sub>2</sub>VASc</b> , median (IQR)                                                            | 4 (2-5)4 (2-5)4 (3-5)4 (3-5)4 (3-5)4 (3-5)                                                                                                                                                                                                                                                                                                                                                                                                                                                                                                                                                                                                                                     |
| 0-1                                                                                                                | 14.514.09.29.49.19.7                                                                                                                                                                                                                                                                                                                                                                                                                                                                                                                                                                                                                                                           |
| 2-3                                                                                                                | 33.532.830.030.729.930.1                                                                                                                                                                                                                                                                                                                                                                                                                                                                                                                                                                                                                                                       |
| ≥4                                                                                                                 | 52.153.260.959.961.060.2                                                                                                                                                                                                                                                                                                                                                                                                                                                                                                                                                                                                                                                       |
| <b>HAS-BLED</b> , median (IQR)                                                                                     | 2 (1-3)2 (1-3)2 (2-3)2 (2-3)2 (2-3)2 (2-3)                                                                                                                                                                                                                                                                                                                                                                                                                                                                                                                                                                                                                                     |

|                                               |                                                                                                                                                                                                                                                                                                                                                                                                                                                                                                                                                                                                                                                                                                                          |      |      |      |      |      |
|-----------------------------------------------|--------------------------------------------------------------------------------------------------------------------------------------------------------------------------------------------------------------------------------------------------------------------------------------------------------------------------------------------------------------------------------------------------------------------------------------------------------------------------------------------------------------------------------------------------------------------------------------------------------------------------------------------------------------------------------------------------------------------------|------|------|------|------|------|
| $\geq 3$                                      | 38.3                                                                                                                                                                                                                                                                                                                                                                                                                                                                                                                                                                                                                                                                                                                     | 39.5 | 44.7 | 43.9 | 44.9 | 43.7 |
| <b>Standard dose</b>                          | 76.9                                                                                                                                                                                                                                                                                                                                                                                                                                                                                                                                                                                                                                                                                                                     | 90.1 | 81.9 | 87.0 | 81.7 | 71.3 |
| <b>Reduced dose</b>                           | 23.1                                                                                                                                                                                                                                                                                                                                                                                                                                                                                                                                                                                                                                                                                                                     | 9.9  | 18.1 | 13.0 | 18.3 | 28.7 |
| <b>Comorbidities</b>                          |                                                                                                                                                                                                                                                                                                                                                                                                                                                                                                                                                                                                                                                                                                                          |      |      |      |      |      |
| Ischemic stroke, or systemic embolism, or TIA | 14.2                                                                                                                                                                                                                                                                                                                                                                                                                                                                                                                                                                                                                                                                                                                     | 14.0 | 15.4 | 15.7 | 15.4 | 15.6 |
| Heart failure                                 | 27.2                                                                                                                                                                                                                                                                                                                                                                                                                                                                                                                                                                                                                                                                                                                     | 27.5 | 31.3 | 31.0 | 31.4 | 31.7 |
| Myocardial infarction                         | .                                                                                                                                                                                                                                                                                                                                                                                                                                                                                                                                                                                                                                                                                                                        | .    | .    | .    | .    | .    |
| Vascular disease                              | 46.8                                                                                                                                                                                                                                                                                                                                                                                                                                                                                                                                                                                                                                                                                                                     | 46.6 | 50.0 | 48.8 | 50.0 | 48.8 |
| Renal dysfunction                             | 13.3                                                                                                                                                                                                                                                                                                                                                                                                                                                                                                                                                                                                                                                                                                                     | 13.7 | 18.8 | 18.3 | 19.1 | 19.0 |
| Previous bleeding                             | 30.2                                                                                                                                                                                                                                                                                                                                                                                                                                                                                                                                                                                                                                                                                                                     | 30.8 | 31.4 | 30.2 | 31.5 | 31.0 |
| Hypertension                                  | 84.3                                                                                                                                                                                                                                                                                                                                                                                                                                                                                                                                                                                                                                                                                                                     | 84.4 | 86.5 | 85.8 | 86.5 | 86.3 |
| Diabetes                                      | 34.4                                                                                                                                                                                                                                                                                                                                                                                                                                                                                                                                                                                                                                                                                                                     | 34.1 | 35.4 | 35.2 | 35.5 | 35.0 |
| Cancer                                        | .                                                                                                                                                                                                                                                                                                                                                                                                                                                                                                                                                                                                                                                                                                                        | .    | .    | .    | .    | .    |
| <b>Concomitant medication</b>                 |                                                                                                                                                                                                                                                                                                                                                                                                                                                                                                                                                                                                                                                                                                                          |      |      |      |      |      |
| Antiplatelet or NSAID                         | 10.8                                                                                                                                                                                                                                                                                                                                                                                                                                                                                                                                                                                                                                                                                                                     | 11.1 | 12.2 | 11.9 | 12.3 | 11.7 |
| Beta-blocker                                  | .                                                                                                                                                                                                                                                                                                                                                                                                                                                                                                                                                                                                                                                                                                                        | .    | .    | .    | .    | .    |
| Calcium channel blocker                       | .                                                                                                                                                                                                                                                                                                                                                                                                                                                                                                                                                                                                                                                                                                                        | .    | .    | .    | .    | .    |
| Renin angiotensin system inhibitor            | .                                                                                                                                                                                                                                                                                                                                                                                                                                                                                                                                                                                                                                                                                                                        | .    | .    | .    | .    | .    |
| Warfarin-experienced                          | 39.3                                                                                                                                                                                                                                                                                                                                                                                                                                                                                                                                                                                                                                                                                                                     | 37.7 | 29.6 | 29.0 | 18.3 | 28.7 |
| <b>Analysis</b>                               | <b>Measure of the risk of an end point</b>                                                                                                                                                                                                                                                                                                                                                                                                                                                                                                                                                                                                                                                                               |      |      |      |      |      |
|                                               | Event rate per 100 person-years                                                                                                                                                                                                                                                                                                                                                                                                                                                                                                                                                                                                                                                                                          |      |      |      |      |      |
|                                               | <b>Comparison of the risk of an end point between groups</b>                                                                                                                                                                                                                                                                                                                                                                                                                                                                                                                                                                                                                                                             |      |      |      |      |      |
|                                               | Cox proportional hazards regression was used to compare outcomes in each of the propensity score-matched cohorts, with robust sandwich estimates to account for the clustering within matched sets                                                                                                                                                                                                                                                                                                                                                                                                                                                                                                                       |      |      |      |      |      |
|                                               | <b>Confounding</b>                                                                                                                                                                                                                                                                                                                                                                                                                                                                                                                                                                                                                                                                                                       |      |      |      |      |      |
|                                               | Three matched cohorts (rivaroxaban vs dabigatran, apixaban vs rivaroxaban, and apixaban vs dabigatran) were created using 1-to-1 propensity score matching without replacement and with a caliper of 0.01. Patients were matched on baseline sociodemographic characteristics, comorbidities, and prior warfarin use. Baseline characteristics were presented descriptively and the standardized difference was used to assess the balance of covariates after matching. A standardized difference less than 10% was considered acceptable. Because all baseline characteristics were balanced after propensity score matching, the Cox proportion hazards regression only included treatment as an independent variable |      |      |      |      |      |
|                                               | <b>Sensitivity analysis</b>                                                                                                                                                                                                                                                                                                                                                                                                                                                                                                                                                                                                                                                                                              |      |      |      |      |      |
|                                               | There were 4 sensitivity analyses:                                                                                                                                                                                                                                                                                                                                                                                                                                                                                                                                                                                                                                                                                       |      |      |      |      |      |
|                                               | First, effectiveness outcomes were compared including all events that occurred between the index date and the end of the enrollment or study period (an analog of "intention-to-treat" analysis in clinical trials). This analysis was performed to assess the potential for the primary findings using an on-treatment analytic approach to be affected by differential censoring between treatment groups                                                                                                                                                                                                                                                                                                              |      |      |      |      |      |
|                                               | Second, to investigate whether dosing affects the comparative effectiveness or safety, additional analyses adjusting for whether a patient received a reduced dose were conducted in the Cox proportional hazards model                                                                                                                                                                                                                                                                                                                                                                                                                                                                                                  |      |      |      |      |      |
|                                               | Third, the study population was limited to patients initiating NOACs from January 1, 2013 to February 28, 2015 to minimize the impact of unmeasured secular trends that may have contributed to the differential effect observed with dabigatran (first to market) and apixaban (last to market)                                                                                                                                                                                                                                                                                                                                                                                                                         |      |      |      |      |      |
|                                               | Fourth, an additional analysis was performed to censor patients at 6 months to minimize the impact of the variable follow-up time with each drug                                                                                                                                                                                                                                                                                                                                                                                                                                                                                                                                                                         |      |      |      |      |      |
|                                               | <b>Supplementary analyses</b>                                                                                                                                                                                                                                                                                                                                                                                                                                                                                                                                                                                                                                                                                            |      |      |      |      |      |
|                                               | Subgroup analyses stratified by CHA <sub>2</sub> DS <sub>2</sub> -VASc score (0 or 1, 2 or 3, and $\geq 4$ ), as well as HAS-BLED score (0-2 and $\geq 3$ )                                                                                                                                                                                                                                                                                                                                                                                                                                                                                                                                                              |      |      |      |      |      |
|                                               | <b>Software for statistical analysis</b>                                                                                                                                                                                                                                                                                                                                                                                                                                                                                                                                                                                                                                                                                 |      |      |      |      |      |
|                                               | SAS 9.3 (SAS Institute Inc, Cary, North Carolina) and Stata 13.1 (Stata Corp, College Station,                                                                                                                                                                                                                                                                                                                                                                                                                                                                                                                                                                                                                           |      |      |      |      |      |

|                                                                                                                                  |                                                                   |
|----------------------------------------------------------------------------------------------------------------------------------|-------------------------------------------------------------------|
|                                                                                                                                  | Texas)<br><b>Statistical significance reference</b><br>Not stated |
| AF, atrial fibrillation; IQR, interquartile range; NSAIDs, nonsteroidal anti-inflammatory drugs; TIA, transient ischemic attack. |                                                                   |

|                                                                                                             |                                                                                                                                                                                                                                                                                                                                                                                                                                                                                                                                                                                                                                                              |            |
|-------------------------------------------------------------------------------------------------------------|--------------------------------------------------------------------------------------------------------------------------------------------------------------------------------------------------------------------------------------------------------------------------------------------------------------------------------------------------------------------------------------------------------------------------------------------------------------------------------------------------------------------------------------------------------------------------------------------------------------------------------------------------------------|------------|
| Study ID                                                                                                    | Seeger et al. <sup>82</sup>                                                                                                                                                                                                                                                                                                                                                                                                                                                                                                                                                                                                                                  |            |
| Reference                                                                                                   | Seeger JD, Bykov K, Bartels DB, Huybrechts K, Zint K, Schneeweiss S. Safety and effectiveness of dabigatran and warfarin in routine care of patients with atrial fibrillation. <i>Thromb Haemost.</i> 2015;114:1277-1289. doi:10.1160/TH15-06-0497                                                                                                                                                                                                                                                                                                                                                                                                           |            |
| Objective                                                                                                   | To assess the comparative effectiveness and safety of dabigatran vs warfarin among patients with nonvalvular atrial fibrillation in routine care                                                                                                                                                                                                                                                                                                                                                                                                                                                                                                             |            |
| Country                                                                                                     | United States                                                                                                                                                                                                                                                                                                                                                                                                                                                                                                                                                                                                                                                |            |
| Design                                                                                                      | Retrospective cohort study                                                                                                                                                                                                                                                                                                                                                                                                                                                                                                                                                                                                                                   |            |
| Data source                                                                                                 | Two commercial health insurance databases (MarketScan [Truven] and Clinformatics [Optum]) that are nationwide in geographical coverage and include some patients with Medicare supplement coverage                                                                                                                                                                                                                                                                                                                                                                                                                                                           |            |
| Time period                                                                                                 | October 2010 to December 2012                                                                                                                                                                                                                                                                                                                                                                                                                                                                                                                                                                                                                                |            |
| NOAC                                                                                                        | Dabigatran 150 mg twice daily                                                                                                                                                                                                                                                                                                                                                                                                                                                                                                                                                                                                                                |            |
| Control                                                                                                     | Warfarin                                                                                                                                                                                                                                                                                                                                                                                                                                                                                                                                                                                                                                                     |            |
| Outcomes                                                                                                    | <b>Effectiveness</b> <ul style="list-style-type: none"><li>Stroke or systemic embolism</li><li>Ischemic stroke</li><li>Hemorrhagic stroke</li><li>Stroke of uncertain cause</li><li>Transient ischemic attack (TIA)</li><li>Myocardial infarction</li><li>Venous thromboembolism</li><li>Deep vein thrombosis</li><li>Pulmonary embolism</li></ul> <b>Safety</b> <ul style="list-style-type: none"><li>Major intracranial bleeding</li><li>Major extracranial bleeding</li><li>Major gastrointestinal (GI) bleeding</li><li>Major upper GI bleeding</li><li>Major lower GI bleeding</li><li>Major urogenital bleeding</li><li>Major other bleeding</li></ul> |            |
| Outcome definitions                                                                                         | Secondary International Classification of Diseases, Ninth Revision (ICD-9). The primary outcomes have demonstrated high positive predictive values in claims databases                                                                                                                                                                                                                                                                                                                                                                                                                                                                                       |            |
| Population (eligibility)                                                                                    | Patient had no receipt of any oral anticoagulant in the preceding year<br>Adults ≥ 18 years with recorded sex were eligible for inclusion provided they had a diagnosis of atrial fibrillation and no suggestion of valvular disease in their prior history. A CHA <sub>2</sub> S <sub>2</sub> -VASC score of 1 or more was also required<br>Patients with a nursing home stay at or before cohort entry were excluded                                                                                                                                                                                                                                       |            |
| Population (study sample)                                                                                   | <b>Study population</b><br>Dabigatran, n = 23 543<br>Warfarin, n = 50 288<br><b>Target population</b><br>N = 385 861                                                                                                                                                                                                                                                                                                                                                                                                                                                                                                                                         |            |
| Population (baseline participant characteristics) (values expressed as percentages unless otherwise stated) |                                                                                                                                                                                                                                                                                                                                                                                                                                                                                                                                                                                                                                                              |            |
|                                                                                                             | Dabigatran                                                                                                                                                                                                                                                                                                                                                                                                                                                                                                                                                                                                                                                   | Warfarin   |
| Women                                                                                                       | 36.3                                                                                                                                                                                                                                                                                                                                                                                                                                                                                                                                                                                                                                                         | 39.3       |
| Age, mean (SD)                                                                                              | 12.3                                                                                                                                                                                                                                                                                                                                                                                                                                                                                                                                                                                                                                                         | 12.2       |
| >65-74 years                                                                                                | 22.0                                                                                                                                                                                                                                                                                                                                                                                                                                                                                                                                                                                                                                                         | 22.2       |
| >75 years                                                                                                   | 29.3                                                                                                                                                                                                                                                                                                                                                                                                                                                                                                                                                                                                                                                         | 40.8       |
| >85 years                                                                                                   | -                                                                                                                                                                                                                                                                                                                                                                                                                                                                                                                                                                                                                                                            | -          |
| CHA <sub>2</sub> DS <sub>2</sub> VASc, mean (SD)                                                            | 2.87 (1.6)                                                                                                                                                                                                                                                                                                                                                                                                                                                                                                                                                                                                                                                   | 3.44 (1.6) |
| HAS-BLED, mean (SD)                                                                                         | 2.14 (1.0)                                                                                                                                                                                                                                                                                                                                                                                                                                                                                                                                                                                                                                                   | 2.39 (1.1) |
| Standard dose                                                                                               | 100                                                                                                                                                                                                                                                                                                                                                                                                                                                                                                                                                                                                                                                          |            |
| Reduced dose                                                                                                | -                                                                                                                                                                                                                                                                                                                                                                                                                                                                                                                                                                                                                                                            |            |
| Comorbidities                                                                                               |                                                                                                                                                                                                                                                                                                                                                                                                                                                                                                                                                                                                                                                              |            |



|                                               |                                                                                                                                                                                                                                                                                                                                                                                                                                                                                                                                                                                                                                                                                                                                                                                                                                                                                                                                                                                                                                                                                                                                                                                                                                                                                                                                                                                                                                                                                                                                                                                                                                                                                                                                                                                                                                   |      |
|-----------------------------------------------|-----------------------------------------------------------------------------------------------------------------------------------------------------------------------------------------------------------------------------------------------------------------------------------------------------------------------------------------------------------------------------------------------------------------------------------------------------------------------------------------------------------------------------------------------------------------------------------------------------------------------------------------------------------------------------------------------------------------------------------------------------------------------------------------------------------------------------------------------------------------------------------------------------------------------------------------------------------------------------------------------------------------------------------------------------------------------------------------------------------------------------------------------------------------------------------------------------------------------------------------------------------------------------------------------------------------------------------------------------------------------------------------------------------------------------------------------------------------------------------------------------------------------------------------------------------------------------------------------------------------------------------------------------------------------------------------------------------------------------------------------------------------------------------------------------------------------------------|------|
| Ischemic stroke, or systemic embolism, or TIA | -                                                                                                                                                                                                                                                                                                                                                                                                                                                                                                                                                                                                                                                                                                                                                                                                                                                                                                                                                                                                                                                                                                                                                                                                                                                                                                                                                                                                                                                                                                                                                                                                                                                                                                                                                                                                                                 | -    |
| Prior stroke                                  | 7.9                                                                                                                                                                                                                                                                                                                                                                                                                                                                                                                                                                                                                                                                                                                                                                                                                                                                                                                                                                                                                                                                                                                                                                                                                                                                                                                                                                                                                                                                                                                                                                                                                                                                                                                                                                                                                               | 10   |
| Previous TIA                                  | 3.9                                                                                                                                                                                                                                                                                                                                                                                                                                                                                                                                                                                                                                                                                                                                                                                                                                                                                                                                                                                                                                                                                                                                                                                                                                                                                                                                                                                                                                                                                                                                                                                                                                                                                                                                                                                                                               | 4.3  |
| Heart failure                                 | 16.3                                                                                                                                                                                                                                                                                                                                                                                                                                                                                                                                                                                                                                                                                                                                                                                                                                                                                                                                                                                                                                                                                                                                                                                                                                                                                                                                                                                                                                                                                                                                                                                                                                                                                                                                                                                                                              | 22.0 |
| Myocardial infarction                         | 3.9                                                                                                                                                                                                                                                                                                                                                                                                                                                                                                                                                                                                                                                                                                                                                                                                                                                                                                                                                                                                                                                                                                                                                                                                                                                                                                                                                                                                                                                                                                                                                                                                                                                                                                                                                                                                                               | 4.8  |
| Peripheral vascular disease                   | 2.6                                                                                                                                                                                                                                                                                                                                                                                                                                                                                                                                                                                                                                                                                                                                                                                                                                                                                                                                                                                                                                                                                                                                                                                                                                                                                                                                                                                                                                                                                                                                                                                                                                                                                                                                                                                                                               | 4.1  |
| Renal dysfunction                             | 9.0                                                                                                                                                                                                                                                                                                                                                                                                                                                                                                                                                                                                                                                                                                                                                                                                                                                                                                                                                                                                                                                                                                                                                                                                                                                                                                                                                                                                                                                                                                                                                                                                                                                                                                                                                                                                                               | 16.7 |
| Previous bleeding (see below)                 | -                                                                                                                                                                                                                                                                                                                                                                                                                                                                                                                                                                                                                                                                                                                                                                                                                                                                                                                                                                                                                                                                                                                                                                                                                                                                                                                                                                                                                                                                                                                                                                                                                                                                                                                                                                                                                                 | -    |
| Upper GI bleed                                | 0.3                                                                                                                                                                                                                                                                                                                                                                                                                                                                                                                                                                                                                                                                                                                                                                                                                                                                                                                                                                                                                                                                                                                                                                                                                                                                                                                                                                                                                                                                                                                                                                                                                                                                                                                                                                                                                               | 0.6  |
| Lower/unspecified GI bleed                    | 2.0                                                                                                                                                                                                                                                                                                                                                                                                                                                                                                                                                                                                                                                                                                                                                                                                                                                                                                                                                                                                                                                                                                                                                                                                                                                                                                                                                                                                                                                                                                                                                                                                                                                                                                                                                                                                                               | 3.2  |
| Hypertension                                  | 96.6                                                                                                                                                                                                                                                                                                                                                                                                                                                                                                                                                                                                                                                                                                                                                                                                                                                                                                                                                                                                                                                                                                                                                                                                                                                                                                                                                                                                                                                                                                                                                                                                                                                                                                                                                                                                                              | 95.5 |
| Diabetes                                      | 19.9                                                                                                                                                                                                                                                                                                                                                                                                                                                                                                                                                                                                                                                                                                                                                                                                                                                                                                                                                                                                                                                                                                                                                                                                                                                                                                                                                                                                                                                                                                                                                                                                                                                                                                                                                                                                                              | 23.4 |
| Cancer                                        | 9.6                                                                                                                                                                                                                                                                                                                                                                                                                                                                                                                                                                                                                                                                                                                                                                                                                                                                                                                                                                                                                                                                                                                                                                                                                                                                                                                                                                                                                                                                                                                                                                                                                                                                                                                                                                                                                               | 12.5 |
| <b>Concomitant medication</b>                 |                                                                                                                                                                                                                                                                                                                                                                                                                                                                                                                                                                                                                                                                                                                                                                                                                                                                                                                                                                                                                                                                                                                                                                                                                                                                                                                                                                                                                                                                                                                                                                                                                                                                                                                                                                                                                                   |      |
| Aspirin                                       | -                                                                                                                                                                                                                                                                                                                                                                                                                                                                                                                                                                                                                                                                                                                                                                                                                                                                                                                                                                                                                                                                                                                                                                                                                                                                                                                                                                                                                                                                                                                                                                                                                                                                                                                                                                                                                                 | -    |
| Beta-blocker                                  | 73.6                                                                                                                                                                                                                                                                                                                                                                                                                                                                                                                                                                                                                                                                                                                                                                                                                                                                                                                                                                                                                                                                                                                                                                                                                                                                                                                                                                                                                                                                                                                                                                                                                                                                                                                                                                                                                              | 71.0 |
| NSAID                                         | 21.5                                                                                                                                                                                                                                                                                                                                                                                                                                                                                                                                                                                                                                                                                                                                                                                                                                                                                                                                                                                                                                                                                                                                                                                                                                                                                                                                                                                                                                                                                                                                                                                                                                                                                                                                                                                                                              | 19.7 |
| Calcium channel blocker                       | 41.5                                                                                                                                                                                                                                                                                                                                                                                                                                                                                                                                                                                                                                                                                                                                                                                                                                                                                                                                                                                                                                                                                                                                                                                                                                                                                                                                                                                                                                                                                                                                                                                                                                                                                                                                                                                                                              | 41.1 |
| Renin angiotensin system inhibitor            | -                                                                                                                                                                                                                                                                                                                                                                                                                                                                                                                                                                                                                                                                                                                                                                                                                                                                                                                                                                                                                                                                                                                                                                                                                                                                                                                                                                                                                                                                                                                                                                                                                                                                                                                                                                                                                                 | -    |
| <b>Analysis</b>                               | <p><b>Measure of the risk of an end point</b><br/>Incidence rates</p> <p><b>Comparison of the risk of an end point between groups</b><br/>Hazard ratios for the comparison between dabigatran and warfarin were estimated in each data base using a Cox proportional hazards regression model</p> <p><b>Confounding</b><br/>Using propensity score matching of dabigatran and warfarin initiators, explicit comparisons were made between contemporaneous initiators of the compared medications in a manner that addressed confounding arising from differences in patient characteristics between the compared medications</p> <p><b>Sensitivity analysis</b><br/>An intention-to-treat analytic approach was applied that maintained patients in their initial exposure group (dabigatran or warfarin) by carrying this exposure forward for 365 days or until the occurrence of a study outcome, disenrollment from the database, admission to a nursing home, or the end of the study period. This analysis was performed to assess the potential for the primary (as-treated) results to be affected by differential censoring between treatment groups but has its own limitations due to increasing exposure misclassification with longer follow-up</p> <p><b>Supplementary analyses</b><br/>High-dimensional propensity score (hdPS) analyses were applied, which improve validity in claims-based studies. The hdPS was estimated by logistic regression in a model including 200 empirically identified covariates with the greatest potential to bias the association between dabigatran and the ischemic or hemorrhagic outcomes (separate hdPS models were developed for each of these), in addition to the investigator-specified covariates</p> <p><b>Software for statistical analysis</b><br/>Not reported</p> |      |

NSAIDs, nonsteroidal anti-inflammatory drugs; SD, standard deviation.

|                                                                                                                    |                                                                                                                                                                                                                                                                                                                                                                                                                                                                                                                                                                                                                                                                                                                                                         |                                    |
|--------------------------------------------------------------------------------------------------------------------|---------------------------------------------------------------------------------------------------------------------------------------------------------------------------------------------------------------------------------------------------------------------------------------------------------------------------------------------------------------------------------------------------------------------------------------------------------------------------------------------------------------------------------------------------------------------------------------------------------------------------------------------------------------------------------------------------------------------------------------------------------|------------------------------------|
| Study ID                                                                                                           | Vaughan Sarrazin et al. <sup>83</sup>                                                                                                                                                                                                                                                                                                                                                                                                                                                                                                                                                                                                                                                                                                                   |                                    |
| Reference                                                                                                          | Vaughan Sarrazin MS, Jones M, Mazur A, Chrischilles E, Cram P. Bleeding rates in Veterans Affairs patients with atrial fibrillation who switch from warfarin to dabigatran. <i>Am J Med.</i> 2014;127:1179-1185. doi:10.1016/j.amjmed.2014.07.024                                                                                                                                                                                                                                                                                                                                                                                                                                                                                                       |                                    |
| Objective                                                                                                          | To assess the relative risks of any, gastrointestinal, intracranial, and other bleeding for Veterans Affairs patients who switched to dabigatran after at least 6 months on warfarin vs patients who continued on warfarin                                                                                                                                                                                                                                                                                                                                                                                                                                                                                                                              |                                    |
| Country                                                                                                            | United States                                                                                                                                                                                                                                                                                                                                                                                                                                                                                                                                                                                                                                                                                                                                           |                                    |
| Design                                                                                                             | Nationwide cohort study                                                                                                                                                                                                                                                                                                                                                                                                                                                                                                                                                                                                                                                                                                                                 |                                    |
| Data source                                                                                                        | National Veterans Affairs administrative encounter and pharmacy data                                                                                                                                                                                                                                                                                                                                                                                                                                                                                                                                                                                                                                                                                    |                                    |
| Time period                                                                                                        | June 2011 to September 2012                                                                                                                                                                                                                                                                                                                                                                                                                                                                                                                                                                                                                                                                                                                             |                                    |
| NOAC                                                                                                               | Dabigatran 150 mg                                                                                                                                                                                                                                                                                                                                                                                                                                                                                                                                                                                                                                                                                                                                       |                                    |
| Control                                                                                                            | Warfarin                                                                                                                                                                                                                                                                                                                                                                                                                                                                                                                                                                                                                                                                                                                                                |                                    |
| Outcomes                                                                                                           | <b>Effectiveness</b><br>Death<br><b>Safety</b><br>Bleeding events, including gastrointestinal, intracranial, and other hemorrhage                                                                                                                                                                                                                                                                                                                                                                                                                                                                                                                                                                                                                       |                                    |
| Outcome definitions                                                                                                | Outcomes were defined using International Classification of Diseases, 9th Revision, Clinical Modification [ICD-9-CM] codes validated previously and used in previous studies of anticoagulation                                                                                                                                                                                                                                                                                                                                                                                                                                                                                                                                                         |                                    |
| Population (eligibility)                                                                                           | Patients with atrial fibrillation who had been taking warfarin for at least 180 days before June 2011, with the most recent fill date within 90 days before June 2011<br>Patients without a diagnosis of atrial fibrillation (ICD-9-CM code 427.31) as identified on VA inpatient and outpatient encounter data during the 12 months before June 2011 were excluded, as were patients with a glomerular filtration rate < 30 mL/min/1.73 m <sup>2</sup> during the prior 12 months (based on National Laboratory Extracts) or with a prosthetic heart valve (based on ICD-9-CM diagnosis and procedure codes from the prior 12 months) because dabigatran use is not appropriate for patients with severe renal disease or valvular atrial fibrillation |                                    |
| Population (study sample)                                                                                          | <b>Study population</b><br>The final sample included 85 344 total patients, of whom 1394 (1.7%) switched from warfarin to dabigatran (150 mg)                                                                                                                                                                                                                                                                                                                                                                                                                                                                                                                                                                                                           |                                    |
| <b>Population (baseline participant characteristics) (values expressed as percentages unless otherwise stated)</b> |                                                                                                                                                                                                                                                                                                                                                                                                                                                                                                                                                                                                                                                                                                                                                         |                                    |
|                                                                                                                    | Patients who never initiated dabigatran use                                                                                                                                                                                                                                                                                                                                                                                                                                                                                                                                                                                                                                                                                                             | Patients initiating dabigatran use |
| <b>Women</b>                                                                                                       | 1.4                                                                                                                                                                                                                                                                                                                                                                                                                                                                                                                                                                                                                                                                                                                                                     | 1.4                                |
| <b>Age, mean (SD)</b>                                                                                              | 74.4 (10.1)                                                                                                                                                                                                                                                                                                                                                                                                                                                                                                                                                                                                                                                                                                                                             | 69.7 (9.0)                         |
| 55-64 years                                                                                                        | 15.8                                                                                                                                                                                                                                                                                                                                                                                                                                                                                                                                                                                                                                                                                                                                                    | 26.3                               |
| 65-74 years                                                                                                        | 30.0                                                                                                                                                                                                                                                                                                                                                                                                                                                                                                                                                                                                                                                                                                                                                    | 39.2                               |
| 75-84                                                                                                              | 33.3                                                                                                                                                                                                                                                                                                                                                                                                                                                                                                                                                                                                                                                                                                                                                    | 24.2                               |
| ≥85 years                                                                                                          | 18.9                                                                                                                                                                                                                                                                                                                                                                                                                                                                                                                                                                                                                                                                                                                                                    | 6.5                                |
| <b>CHA<sub>2</sub>DS<sub>2</sub>VASc, mean (SD)</b>                                                                | -                                                                                                                                                                                                                                                                                                                                                                                                                                                                                                                                                                                                                                                                                                                                                       | -                                  |
| <b>CHADS<sup>2</sup>, mean (SD)</b>                                                                                | 2.21 (1.12)                                                                                                                                                                                                                                                                                                                                                                                                                                                                                                                                                                                                                                                                                                                                             | 2.08 (1.12)                        |
| <b>HAS-BLED, mean (SD)</b>                                                                                         | 2.63 (1.18)                                                                                                                                                                                                                                                                                                                                                                                                                                                                                                                                                                                                                                                                                                                                             | 2.67 (1.23)                        |
| <b>Standard dose</b>                                                                                               | 100                                                                                                                                                                                                                                                                                                                                                                                                                                                                                                                                                                                                                                                                                                                                                     | 100                                |
| <b>Reduced dose</b>                                                                                                | -                                                                                                                                                                                                                                                                                                                                                                                                                                                                                                                                                                                                                                                                                                                                                       | -                                  |
| <b>Comorbidities</b>                                                                                               |                                                                                                                                                                                                                                                                                                                                                                                                                                                                                                                                                                                                                                                                                                                                                         |                                    |
| Ischemic stroke, or systemic embolism, or TIA                                                                      | -                                                                                                                                                                                                                                                                                                                                                                                                                                                                                                                                                                                                                                                                                                                                                       | -                                  |
| Cardiomyopathy                                                                                                     | 10.3                                                                                                                                                                                                                                                                                                                                                                                                                                                                                                                                                                                                                                                                                                                                                    | 13.9                               |
| Other dysrhythmia                                                                                                  | 15.3                                                                                                                                                                                                                                                                                                                                                                                                                                                                                                                                                                                                                                                                                                                                                    | 20.5                               |
| Heart failure                                                                                                      | 29.8                                                                                                                                                                                                                                                                                                                                                                                                                                                                                                                                                                                                                                                                                                                                                    | 34.1                               |
| Myocardial infarction                                                                                              | 4.4                                                                                                                                                                                                                                                                                                                                                                                                                                                                                                                                                                                                                                                                                                                                                     | 5.8                                |
| Vascular disease                                                                                                   | -                                                                                                                                                                                                                                                                                                                                                                                                                                                                                                                                                                                                                                                                                                                                                       | -                                  |

|                                                    |                                                                                                                                                                                                                                                                                                                                                                                                                                                                                                                                                                                                                                                                                                                                                                                                                                                                      |      |
|----------------------------------------------------|----------------------------------------------------------------------------------------------------------------------------------------------------------------------------------------------------------------------------------------------------------------------------------------------------------------------------------------------------------------------------------------------------------------------------------------------------------------------------------------------------------------------------------------------------------------------------------------------------------------------------------------------------------------------------------------------------------------------------------------------------------------------------------------------------------------------------------------------------------------------|------|
| Rheumatic/other valve disorder                     | 8.8                                                                                                                                                                                                                                                                                                                                                                                                                                                                                                                                                                                                                                                                                                                                                                                                                                                                  | 7.3  |
| Renal dysfunction (see below)                      |                                                                                                                                                                                                                                                                                                                                                                                                                                                                                                                                                                                                                                                                                                                                                                                                                                                                      |      |
| Kidney function (GFR, mL/min/1.73 m <sup>2</sup> ) |                                                                                                                                                                                                                                                                                                                                                                                                                                                                                                                                                                                                                                                                                                                                                                                                                                                                      |      |
| Normal GFR or mild disease (GFR ≥ 60)              | 52.2                                                                                                                                                                                                                                                                                                                                                                                                                                                                                                                                                                                                                                                                                                                                                                                                                                                                 | 64.9 |
| Moderate (GFR 30-59)                               | 31.2                                                                                                                                                                                                                                                                                                                                                                                                                                                                                                                                                                                                                                                                                                                                                                                                                                                                 | 23.4 |
| Previous bleeding                                  | -                                                                                                                                                                                                                                                                                                                                                                                                                                                                                                                                                                                                                                                                                                                                                                                                                                                                    | -    |
| Hypertension                                       | -                                                                                                                                                                                                                                                                                                                                                                                                                                                                                                                                                                                                                                                                                                                                                                                                                                                                    | -    |
| Diabetes                                           | -                                                                                                                                                                                                                                                                                                                                                                                                                                                                                                                                                                                                                                                                                                                                                                                                                                                                    | -    |
| Cancer                                             | -                                                                                                                                                                                                                                                                                                                                                                                                                                                                                                                                                                                                                                                                                                                                                                                                                                                                    | -    |
| <b>Concomitant medication</b>                      |                                                                                                                                                                                                                                                                                                                                                                                                                                                                                                                                                                                                                                                                                                                                                                                                                                                                      |      |
| Aspirin                                            | -                                                                                                                                                                                                                                                                                                                                                                                                                                                                                                                                                                                                                                                                                                                                                                                                                                                                    | -    |
| Beta-blocker                                       | -                                                                                                                                                                                                                                                                                                                                                                                                                                                                                                                                                                                                                                                                                                                                                                                                                                                                    | -    |
| NSAID                                              | -                                                                                                                                                                                                                                                                                                                                                                                                                                                                                                                                                                                                                                                                                                                                                                                                                                                                    | -    |
| Calcium channel blocker                            | -                                                                                                                                                                                                                                                                                                                                                                                                                                                                                                                                                                                                                                                                                                                                                                                                                                                                    | -    |
| Renin angiotensin system inhibitor                 | -                                                                                                                                                                                                                                                                                                                                                                                                                                                                                                                                                                                                                                                                                                                                                                                                                                                                    | -    |
| <b>Analysis</b>                                    | <b>Measure of the risk of an end point</b><br>Marginal structural models were used to determine the odds of any bleeding, gastrointestinal hemorrhage, intracranial hemorrhage, other hemorrhage, or death for patients taking dabigatran relative to warfarin. Marginal structural models reduce bias by weighting the contribution of each patient during a given week by “stabilized” weights, where stabilized weights reflect both baseline and time-varying patient covariates. Two sets of weights were calculated for each patient-week, the first reflecting patient covariates that affect anticoagulant selection, and the second reflecting characteristics that affect censoring events. Weighting observations effectively creates, for each week, a pseudopopulation in which patient covariates are no longer related to dabigatran use or censoring |      |
|                                                    | <b>Comparison of the risk of an end point between groups</b><br>The relationship between dabigatran use and each outcome was determined using separate weighted pooled logistic regression models for each outcome. Models were estimated using generalized estimating equations and robust standard errors                                                                                                                                                                                                                                                                                                                                                                                                                                                                                                                                                          |      |
|                                                    | <b>Confounding</b><br>The study uses marginal structural logistic regression models, which address potential bias in time-to-event studies when a time-dependent covariate is a risk factor for the event and predicts subsequent exposure                                                                                                                                                                                                                                                                                                                                                                                                                                                                                                                                                                                                                           |      |
|                                                    | <b>Sensitivity analysis</b><br>Three sets of sensitivity analyses were generated for each outcome. First, because bleeding events that are recorded on outpatient visits may be relatively minor, bleeding episodes were also defined using inpatient claims only (as a proxy for severe bleeds). Second, rather than censoring patients who died in analysis of bleeding events, a composite outcome was defined as bleeding or death. Finally, in contrast to the primary analysis in which patients were censored on the day their medication supply ran out, an “intention-to-treat” approach was used                                                                                                                                                                                                                                                           |      |
|                                                    | For each sensitivity analysis, stabilized weights were recalculated and weighted pooled logistic regression models were generated                                                                                                                                                                                                                                                                                                                                                                                                                                                                                                                                                                                                                                                                                                                                    |      |
|                                                    | <b>Software for statistical analysis</b><br>SAS 9.3 (SAS Institute Inc, Cary, North Carolina)                                                                                                                                                                                                                                                                                                                                                                                                                                                                                                                                                                                                                                                                                                                                                                        |      |
|                                                    | GFR, glomerular filtration rate; NSAIDs, nonsteroidal anti-inflammatory drugs; SD, standard deviation; TIA, transient ischemic attack.                                                                                                                                                                                                                                                                                                                                                                                                                                                                                                                                                                                                                                                                                                                               |      |
|                                                    |                                                                                                                                                                                                                                                                                                                                                                                                                                                                                                                                                                                                                                                                                                                                                                                                                                                                      |      |
|                                                    |                                                                                                                                                                                                                                                                                                                                                                                                                                                                                                                                                                                                                                                                                                                                                                                                                                                                      |      |
|                                                    |                                                                                                                                                                                                                                                                                                                                                                                                                                                                                                                                                                                                                                                                                                                                                                                                                                                                      |      |

|                                                                                                                    |                                                                                                                                                                                                                                                                                                                                                                                                                                                                                                                                                                                                                                                                                                                                                                                                                                                                                                                                                                                                                                                           |                  |                                  |                  |                                 |  |  |            |          |            |          |       |      |      |      |      |                |            |            |            |            |           |   |   |   |   |           |   |   |   |   |           |   |   |   |   |                                                  |           |           |           |           |                     |           |           |           |           |               |   |   |    |   |              |   |   |    |   |
|--------------------------------------------------------------------------------------------------------------------|-----------------------------------------------------------------------------------------------------------------------------------------------------------------------------------------------------------------------------------------------------------------------------------------------------------------------------------------------------------------------------------------------------------------------------------------------------------------------------------------------------------------------------------------------------------------------------------------------------------------------------------------------------------------------------------------------------------------------------------------------------------------------------------------------------------------------------------------------------------------------------------------------------------------------------------------------------------------------------------------------------------------------------------------------------------|------------------|----------------------------------|------------------|---------------------------------|--|--|------------|----------|------------|----------|-------|------|------|------|------|----------------|------------|------------|------------|------------|-----------|---|---|---|---|-----------|---|---|---|---|-----------|---|---|---|---|--------------------------------------------------|-----------|-----------|-----------|-----------|---------------------|-----------|-----------|-----------|-----------|---------------|---|---|----|---|--------------|---|---|----|---|
| Study ID                                                                                                           | Villines et al. <sup>84</sup>                                                                                                                                                                                                                                                                                                                                                                                                                                                                                                                                                                                                                                                                                                                                                                                                                                                                                                                                                                                                                             |                  |                                  |                  |                                 |  |  |            |          |            |          |       |      |      |      |      |                |            |            |            |            |           |   |   |   |   |           |   |   |   |   |           |   |   |   |   |                                                  |           |           |           |           |                     |           |           |           |           |               |   |   |    |   |              |   |   |    |   |
| Reference                                                                                                          | Villines TC, Schnee J, Fraeman K, Siu K, Reynolds MW, Collins J, Schwartzman E. A comparison of the safety and effectiveness of dabigatran and warfarin in non-valvular atrial fibrillation patients in a large healthcare system. <i>Thromb Haemost.</i> 2015;114:1290-1298. doi:10.1160/TH15-06-0453                                                                                                                                                                                                                                                                                                                                                                                                                                                                                                                                                                                                                                                                                                                                                    |                  |                                  |                  |                                 |  |  |            |          |            |          |       |      |      |      |      |                |            |            |            |            |           |   |   |   |   |           |   |   |   |   |           |   |   |   |   |                                                  |           |           |           |           |                     |           |           |           |           |               |   |   |    |   |              |   |   |    |   |
| Objective                                                                                                          | To compare the safety and effectiveness of dabigatran and warfarin in clinical practice                                                                                                                                                                                                                                                                                                                                                                                                                                                                                                                                                                                                                                                                                                                                                                                                                                                                                                                                                                   |                  |                                  |                  |                                 |  |  |            |          |            |          |       |      |      |      |      |                |            |            |            |            |           |   |   |   |   |           |   |   |   |   |           |   |   |   |   |                                                  |           |           |           |           |                     |           |           |           |           |               |   |   |    |   |              |   |   |    |   |
| Country                                                                                                            | United States                                                                                                                                                                                                                                                                                                                                                                                                                                                                                                                                                                                                                                                                                                                                                                                                                                                                                                                                                                                                                                             |                  |                                  |                  |                                 |  |  |            |          |            |          |       |      |      |      |      |                |            |            |            |            |           |   |   |   |   |           |   |   |   |   |           |   |   |   |   |                                                  |           |           |           |           |                     |           |           |           |           |               |   |   |    |   |              |   |   |    |   |
| Design                                                                                                             | Retrospective cohort study                                                                                                                                                                                                                                                                                                                                                                                                                                                                                                                                                                                                                                                                                                                                                                                                                                                                                                                                                                                                                                |                  |                                  |                  |                                 |  |  |            |          |            |          |       |      |      |      |      |                |            |            |            |            |           |   |   |   |   |           |   |   |   |   |           |   |   |   |   |                                                  |           |           |           |           |                     |           |           |           |           |               |   |   |    |   |              |   |   |    |   |
| Data source                                                                                                        | US Department of Defense (DoD) claims database                                                                                                                                                                                                                                                                                                                                                                                                                                                                                                                                                                                                                                                                                                                                                                                                                                                                                                                                                                                                            |                  |                                  |                  |                                 |  |  |            |          |            |          |       |      |      |      |      |                |            |            |            |            |           |   |   |   |   |           |   |   |   |   |           |   |   |   |   |                                                  |           |           |           |           |                     |           |           |           |           |               |   |   |    |   |              |   |   |    |   |
| Time period                                                                                                        | October 1, 2009 to July 31, 2013                                                                                                                                                                                                                                                                                                                                                                                                                                                                                                                                                                                                                                                                                                                                                                                                                                                                                                                                                                                                                          |                  |                                  |                  |                                 |  |  |            |          |            |          |       |      |      |      |      |                |            |            |            |            |           |   |   |   |   |           |   |   |   |   |           |   |   |   |   |                                                  |           |           |           |           |                     |           |           |           |           |               |   |   |    |   |              |   |   |    |   |
| NOAC                                                                                                               | <ul style="list-style-type: none"><li>Dabigatran 150 mg</li><li>Dabigatran 75 mg</li></ul>                                                                                                                                                                                                                                                                                                                                                                                                                                                                                                                                                                                                                                                                                                                                                                                                                                                                                                                                                                |                  |                                  |                  |                                 |  |  |            |          |            |          |       |      |      |      |      |                |            |            |            |            |           |   |   |   |   |           |   |   |   |   |           |   |   |   |   |                                                  |           |           |           |           |                     |           |           |           |           |               |   |   |    |   |              |   |   |    |   |
| Control                                                                                                            | Warfarin                                                                                                                                                                                                                                                                                                                                                                                                                                                                                                                                                                                                                                                                                                                                                                                                                                                                                                                                                                                                                                                  |                  |                                  |                  |                                 |  |  |            |          |            |          |       |      |      |      |      |                |            |            |            |            |           |   |   |   |   |           |   |   |   |   |           |   |   |   |   |                                                  |           |           |           |           |                     |           |           |           |           |               |   |   |    |   |              |   |   |    |   |
| Outcomes                                                                                                           | <b>Effectiveness</b> <ul style="list-style-type: none"><li>Stroke (both hemorrhagic and ischemic)</li><li>Ischemic stroke</li><li>Hemorrhagic stroke</li><li>Transient ischemic attack</li></ul> <b>Safety</b> <ul style="list-style-type: none"><li>Major bleeding</li><li>Major intracranial bleeding</li><li>Major extracranial bleeding</li><li>Major gastrointestinal (GI) bleeding (major upper GI bleeding, major lower GI bleeding)</li><li>Major urogenital bleeding</li><li>Major other bleeding</li></ul>                                                                                                                                                                                                                                                                                                                                                                                                                                                                                                                                      |                  |                                  |                  |                                 |  |  |            |          |            |          |       |      |      |      |      |                |            |            |            |            |           |   |   |   |   |           |   |   |   |   |           |   |   |   |   |                                                  |           |           |           |           |                     |           |           |           |           |               |   |   |    |   |              |   |   |    |   |
| Outcome definitions                                                                                                | Study outcomes were identified by ICD-9 codes for inpatient admitting and primary inpatient diagnosis codes on the inpatient claim. Only 1 study outcome was assigned per hospitalization                                                                                                                                                                                                                                                                                                                                                                                                                                                                                                                                                                                                                                                                                                                                                                                                                                                                 |                  |                                  |                  |                                 |  |  |            |          |            |          |       |      |      |      |      |                |            |            |            |            |           |   |   |   |   |           |   |   |   |   |           |   |   |   |   |                                                  |           |           |           |           |                     |           |           |           |           |               |   |   |    |   |              |   |   |    |   |
| Population (eligibility)                                                                                           | Oral anticoagulant treatment-naïve NVAF patients with their first prescription for either dabigatran (either FDA-approved dose) or warfarin during the study period. Patients had to be aged 18 to 89 years at the index date, to have had ≥ 1 AF diagnosis at the index date or within the baseline period, and to have been continuously enrolled in the health plan during the baseline period<br><br>Patients were excluded if they had a diagnosis of hyperthyroidism during the baseline period, ≥ 1 claim with a diagnosis of cardiac surgery, pericarditis, myocarditis, or pulmonary embolism within 3 months of the first diagnosis of AF (to exclude patients with transient causes of AF), or ≥ 1 medical claim for valvular heart disease during the baseline period                                                                                                                                                                                                                                                                         |                  |                                  |                  |                                 |  |  |            |          |            |          |       |      |      |      |      |                |            |            |            |            |           |   |   |   |   |           |   |   |   |   |           |   |   |   |   |                                                  |           |           |           |           |                     |           |           |           |           |               |   |   |    |   |              |   |   |    |   |
| Population (study sample)                                                                                          | <b>Study population</b><br>Dabigatran, n = 14 813<br>Warfarin, n = 24 500<br><b>Target population</b><br>N = 167 364                                                                                                                                                                                                                                                                                                                                                                                                                                                                                                                                                                                                                                                                                                                                                                                                                                                                                                                                      |                  |                                  |                  |                                 |  |  |            |          |            |          |       |      |      |      |      |                |            |            |            |            |           |   |   |   |   |           |   |   |   |   |           |   |   |   |   |                                                  |           |           |           |           |                     |           |           |           |           |               |   |   |    |   |              |   |   |    |   |
| <b>Population (baseline participant characteristics)</b> (values expressed as percentages unless otherwise stated) |                                                                                                                                                                                                                                                                                                                                                                                                                                                                                                                                                                                                                                                                                                                                                                                                                                                                                                                                                                                                                                                           |                  |                                  |                  |                                 |  |  |            |          |            |          |       |      |      |      |      |                |            |            |            |            |           |   |   |   |   |           |   |   |   |   |           |   |   |   |   |                                                  |           |           |           |           |                     |           |           |           |           |               |   |   |    |   |              |   |   |    |   |
|                                                                                                                    | <table><tr><td></td><td>Before propensity score matching</td><td>propensity score</td><td>After propensity score matching</td><td></td></tr><tr><td></td><td>Dabigatran</td><td>Warfarin</td><td>Dabigatran</td><td>Warfarin</td></tr><tr><td>Women</td><td>40.9</td><td>42.1</td><td>41.2</td><td>41.1</td></tr><tr><td>Age, mean (SD)</td><td>73.1 (9.6)</td><td>74.5 (9.2)</td><td>73.8 (9.3)</td><td>74.0 (9.0)</td></tr><tr><td>&gt;65 years</td><td>-</td><td>-</td><td>-</td><td>-</td></tr><tr><td>&gt;75 years</td><td>-</td><td>-</td><td>-</td><td>-</td></tr><tr><td>&gt;85 years</td><td>-</td><td>-</td><td>-</td><td>-</td></tr><tr><td>CHA<sub>2</sub>DS<sub>2</sub>VASc, mean (SD)</td><td>3.8 (1.7)</td><td>4.2 (1.8)</td><td>3.9 (1.7)</td><td>3.9 (1.7)</td></tr><tr><td>HAS-BLED, mean (SD)</td><td>3.4 (1.3)</td><td>3.6 (1.3)</td><td>3.4 (1.2)</td><td>3.4 (1.3)</td></tr><tr><td>Standard dose</td><td>-</td><td>-</td><td>88</td><td>-</td></tr><tr><td>Reduced dose</td><td>-</td><td>-</td><td>12</td><td>-</td></tr></table> |                  | Before propensity score matching | propensity score | After propensity score matching |  |  | Dabigatran | Warfarin | Dabigatran | Warfarin | Women | 40.9 | 42.1 | 41.2 | 41.1 | Age, mean (SD) | 73.1 (9.6) | 74.5 (9.2) | 73.8 (9.3) | 74.0 (9.0) | >65 years | - | - | - | - | >75 years | - | - | - | - | >85 years | - | - | - | - | CHA <sub>2</sub> DS <sub>2</sub> VASc, mean (SD) | 3.8 (1.7) | 4.2 (1.8) | 3.9 (1.7) | 3.9 (1.7) | HAS-BLED, mean (SD) | 3.4 (1.3) | 3.6 (1.3) | 3.4 (1.2) | 3.4 (1.3) | Standard dose | - | - | 88 | - | Reduced dose | - | - | 12 | - |
|                                                                                                                    | Before propensity score matching                                                                                                                                                                                                                                                                                                                                                                                                                                                                                                                                                                                                                                                                                                                                                                                                                                                                                                                                                                                                                          | propensity score | After propensity score matching  |                  |                                 |  |  |            |          |            |          |       |      |      |      |      |                |            |            |            |            |           |   |   |   |   |           |   |   |   |   |           |   |   |   |   |                                                  |           |           |           |           |                     |           |           |           |           |               |   |   |    |   |              |   |   |    |   |
|                                                                                                                    | Dabigatran                                                                                                                                                                                                                                                                                                                                                                                                                                                                                                                                                                                                                                                                                                                                                                                                                                                                                                                                                                                                                                                | Warfarin         | Dabigatran                       | Warfarin         |                                 |  |  |            |          |            |          |       |      |      |      |      |                |            |            |            |            |           |   |   |   |   |           |   |   |   |   |           |   |   |   |   |                                                  |           |           |           |           |                     |           |           |           |           |               |   |   |    |   |              |   |   |    |   |
| Women                                                                                                              | 40.9                                                                                                                                                                                                                                                                                                                                                                                                                                                                                                                                                                                                                                                                                                                                                                                                                                                                                                                                                                                                                                                      | 42.1             | 41.2                             | 41.1             |                                 |  |  |            |          |            |          |       |      |      |      |      |                |            |            |            |            |           |   |   |   |   |           |   |   |   |   |           |   |   |   |   |                                                  |           |           |           |           |                     |           |           |           |           |               |   |   |    |   |              |   |   |    |   |
| Age, mean (SD)                                                                                                     | 73.1 (9.6)                                                                                                                                                                                                                                                                                                                                                                                                                                                                                                                                                                                                                                                                                                                                                                                                                                                                                                                                                                                                                                                | 74.5 (9.2)       | 73.8 (9.3)                       | 74.0 (9.0)       |                                 |  |  |            |          |            |          |       |      |      |      |      |                |            |            |            |            |           |   |   |   |   |           |   |   |   |   |           |   |   |   |   |                                                  |           |           |           |           |                     |           |           |           |           |               |   |   |    |   |              |   |   |    |   |
| >65 years                                                                                                          | -                                                                                                                                                                                                                                                                                                                                                                                                                                                                                                                                                                                                                                                                                                                                                                                                                                                                                                                                                                                                                                                         | -                | -                                | -                |                                 |  |  |            |          |            |          |       |      |      |      |      |                |            |            |            |            |           |   |   |   |   |           |   |   |   |   |           |   |   |   |   |                                                  |           |           |           |           |                     |           |           |           |           |               |   |   |    |   |              |   |   |    |   |
| >75 years                                                                                                          | -                                                                                                                                                                                                                                                                                                                                                                                                                                                                                                                                                                                                                                                                                                                                                                                                                                                                                                                                                                                                                                                         | -                | -                                | -                |                                 |  |  |            |          |            |          |       |      |      |      |      |                |            |            |            |            |           |   |   |   |   |           |   |   |   |   |           |   |   |   |   |                                                  |           |           |           |           |                     |           |           |           |           |               |   |   |    |   |              |   |   |    |   |
| >85 years                                                                                                          | -                                                                                                                                                                                                                                                                                                                                                                                                                                                                                                                                                                                                                                                                                                                                                                                                                                                                                                                                                                                                                                                         | -                | -                                | -                |                                 |  |  |            |          |            |          |       |      |      |      |      |                |            |            |            |            |           |   |   |   |   |           |   |   |   |   |           |   |   |   |   |                                                  |           |           |           |           |                     |           |           |           |           |               |   |   |    |   |              |   |   |    |   |
| CHA <sub>2</sub> DS <sub>2</sub> VASc, mean (SD)                                                                   | 3.8 (1.7)                                                                                                                                                                                                                                                                                                                                                                                                                                                                                                                                                                                                                                                                                                                                                                                                                                                                                                                                                                                                                                                 | 4.2 (1.8)        | 3.9 (1.7)                        | 3.9 (1.7)        |                                 |  |  |            |          |            |          |       |      |      |      |      |                |            |            |            |            |           |   |   |   |   |           |   |   |   |   |           |   |   |   |   |                                                  |           |           |           |           |                     |           |           |           |           |               |   |   |    |   |              |   |   |    |   |
| HAS-BLED, mean (SD)                                                                                                | 3.4 (1.3)                                                                                                                                                                                                                                                                                                                                                                                                                                                                                                                                                                                                                                                                                                                                                                                                                                                                                                                                                                                                                                                 | 3.6 (1.3)        | 3.4 (1.2)                        | 3.4 (1.3)        |                                 |  |  |            |          |            |          |       |      |      |      |      |                |            |            |            |            |           |   |   |   |   |           |   |   |   |   |           |   |   |   |   |                                                  |           |           |           |           |                     |           |           |           |           |               |   |   |    |   |              |   |   |    |   |
| Standard dose                                                                                                      | -                                                                                                                                                                                                                                                                                                                                                                                                                                                                                                                                                                                                                                                                                                                                                                                                                                                                                                                                                                                                                                                         | -                | 88                               | -                |                                 |  |  |            |          |            |          |       |      |      |      |      |                |            |            |            |            |           |   |   |   |   |           |   |   |   |   |           |   |   |   |   |                                                  |           |           |           |           |                     |           |           |           |           |               |   |   |    |   |              |   |   |    |   |
| Reduced dose                                                                                                       | -                                                                                                                                                                                                                                                                                                                                                                                                                                                                                                                                                                                                                                                                                                                                                                                                                                                                                                                                                                                                                                                         | -                | 12                               | -                |                                 |  |  |            |          |            |          |       |      |      |      |      |                |            |            |            |            |           |   |   |   |   |           |   |   |   |   |           |   |   |   |   |                                                  |           |           |           |           |                     |           |           |           |           |               |   |   |    |   |              |   |   |    |   |

|                                                                                                                        |                                                                                                                                                                                                                                                                                                                                                                                                                                                                                                                                                                                                                                                                                                                                                                                                                                                                                                                                                                                                                                                                                                                                                                                                                                                                                                                                                                                                                                                                                                                                                                                                                                                                                                                                                                                                        |      |      |      |
|------------------------------------------------------------------------------------------------------------------------|--------------------------------------------------------------------------------------------------------------------------------------------------------------------------------------------------------------------------------------------------------------------------------------------------------------------------------------------------------------------------------------------------------------------------------------------------------------------------------------------------------------------------------------------------------------------------------------------------------------------------------------------------------------------------------------------------------------------------------------------------------------------------------------------------------------------------------------------------------------------------------------------------------------------------------------------------------------------------------------------------------------------------------------------------------------------------------------------------------------------------------------------------------------------------------------------------------------------------------------------------------------------------------------------------------------------------------------------------------------------------------------------------------------------------------------------------------------------------------------------------------------------------------------------------------------------------------------------------------------------------------------------------------------------------------------------------------------------------------------------------------------------------------------------------------|------|------|------|
| <b>Comorbidities</b>                                                                                                   |                                                                                                                                                                                                                                                                                                                                                                                                                                                                                                                                                                                                                                                                                                                                                                                                                                                                                                                                                                                                                                                                                                                                                                                                                                                                                                                                                                                                                                                                                                                                                                                                                                                                                                                                                                                                        |      |      |      |
| Ischemic stroke, or systemic embolism, or TIA                                                                          | -                                                                                                                                                                                                                                                                                                                                                                                                                                                                                                                                                                                                                                                                                                                                                                                                                                                                                                                                                                                                                                                                                                                                                                                                                                                                                                                                                                                                                                                                                                                                                                                                                                                                                                                                                                                                      | -    | -    | -    |
| Ischemic stroke                                                                                                        | 3.4                                                                                                                                                                                                                                                                                                                                                                                                                                                                                                                                                                                                                                                                                                                                                                                                                                                                                                                                                                                                                                                                                                                                                                                                                                                                                                                                                                                                                                                                                                                                                                                                                                                                                                                                                                                                    | 5.4  | 3.7  | 3.3  |
| TIA                                                                                                                    | 1.6                                                                                                                                                                                                                                                                                                                                                                                                                                                                                                                                                                                                                                                                                                                                                                                                                                                                                                                                                                                                                                                                                                                                                                                                                                                                                                                                                                                                                                                                                                                                                                                                                                                                                                                                                                                                    | 2.1  | 1.7  | 1.6  |
| Heart failure                                                                                                          | 11.4                                                                                                                                                                                                                                                                                                                                                                                                                                                                                                                                                                                                                                                                                                                                                                                                                                                                                                                                                                                                                                                                                                                                                                                                                                                                                                                                                                                                                                                                                                                                                                                                                                                                                                                                                                                                   | 18.7 | 12.9 | 12.3 |
| Myocardial infarction                                                                                                  | -                                                                                                                                                                                                                                                                                                                                                                                                                                                                                                                                                                                                                                                                                                                                                                                                                                                                                                                                                                                                                                                                                                                                                                                                                                                                                                                                                                                                                                                                                                                                                                                                                                                                                                                                                                                                      | -    | -    | -    |
| Vascular disease                                                                                                       | -                                                                                                                                                                                                                                                                                                                                                                                                                                                                                                                                                                                                                                                                                                                                                                                                                                                                                                                                                                                                                                                                                                                                                                                                                                                                                                                                                                                                                                                                                                                                                                                                                                                                                                                                                                                                      | -    | -    | -    |
| Coronary heart disease                                                                                                 | 18.3                                                                                                                                                                                                                                                                                                                                                                                                                                                                                                                                                                                                                                                                                                                                                                                                                                                                                                                                                                                                                                                                                                                                                                                                                                                                                                                                                                                                                                                                                                                                                                                                                                                                                                                                                                                                   | 25.3 | 19.8 | 19.4 |
| Renal dysfunction (see below)                                                                                          | -                                                                                                                                                                                                                                                                                                                                                                                                                                                                                                                                                                                                                                                                                                                                                                                                                                                                                                                                                                                                                                                                                                                                                                                                                                                                                                                                                                                                                                                                                                                                                                                                                                                                                                                                                                                                      | -    | -    | -    |
| Kidney disease                                                                                                         | 10.2                                                                                                                                                                                                                                                                                                                                                                                                                                                                                                                                                                                                                                                                                                                                                                                                                                                                                                                                                                                                                                                                                                                                                                                                                                                                                                                                                                                                                                                                                                                                                                                                                                                                                                                                                                                                   | 19.8 | 11.7 | 11.1 |
| Previous bleeding                                                                                                      | -                                                                                                                                                                                                                                                                                                                                                                                                                                                                                                                                                                                                                                                                                                                                                                                                                                                                                                                                                                                                                                                                                                                                                                                                                                                                                                                                                                                                                                                                                                                                                                                                                                                                                                                                                                                                      | -    | -    | -    |
| Hypertension (see below)                                                                                               | -                                                                                                                                                                                                                                                                                                                                                                                                                                                                                                                                                                                                                                                                                                                                                                                                                                                                                                                                                                                                                                                                                                                                                                                                                                                                                                                                                                                                                                                                                                                                                                                                                                                                                                                                                                                                      | -    | -    | -    |
| Hypertension diagnosis                                                                                                 | 36.3                                                                                                                                                                                                                                                                                                                                                                                                                                                                                                                                                                                                                                                                                                                                                                                                                                                                                                                                                                                                                                                                                                                                                                                                                                                                                                                                                                                                                                                                                                                                                                                                                                                                                                                                                                                                   | 47.6 | 38.3 | 37.2 |
| Hypertension diagnosis or treatment                                                                                    | 96.1                                                                                                                                                                                                                                                                                                                                                                                                                                                                                                                                                                                                                                                                                                                                                                                                                                                                                                                                                                                                                                                                                                                                                                                                                                                                                                                                                                                                                                                                                                                                                                                                                                                                                                                                                                                                   | 96.5 | 96.5 | 95.7 |
| Diabetes mellitus                                                                                                      | 13.6                                                                                                                                                                                                                                                                                                                                                                                                                                                                                                                                                                                                                                                                                                                                                                                                                                                                                                                                                                                                                                                                                                                                                                                                                                                                                                                                                                                                                                                                                                                                                                                                                                                                                                                                                                                                   | 19.7 | 14.9 | 14.4 |
| Cancer                                                                                                                 | -                                                                                                                                                                                                                                                                                                                                                                                                                                                                                                                                                                                                                                                                                                                                                                                                                                                                                                                                                                                                                                                                                                                                                                                                                                                                                                                                                                                                                                                                                                                                                                                                                                                                                                                                                                                                      | -    | -    | -    |
| <b>Concomitant medication</b>                                                                                          |                                                                                                                                                                                                                                                                                                                                                                                                                                                                                                                                                                                                                                                                                                                                                                                                                                                                                                                                                                                                                                                                                                                                                                                                                                                                                                                                                                                                                                                                                                                                                                                                                                                                                                                                                                                                        |      |      |      |
| <b>Other antihypertensive (beta-blockers, calcium channel blockers, or diuretics or other antihypertensive agents)</b> | 9.6                                                                                                                                                                                                                                                                                                                                                                                                                                                                                                                                                                                                                                                                                                                                                                                                                                                                                                                                                                                                                                                                                                                                                                                                                                                                                                                                                                                                                                                                                                                                                                                                                                                                                                                                                                                                    | 12.1 | 10.3 | 9.8  |
| Aspirin                                                                                                                | -                                                                                                                                                                                                                                                                                                                                                                                                                                                                                                                                                                                                                                                                                                                                                                                                                                                                                                                                                                                                                                                                                                                                                                                                                                                                                                                                                                                                                                                                                                                                                                                                                                                                                                                                                                                                      | -    | -    | -    |
| Beta-blocker                                                                                                           | -                                                                                                                                                                                                                                                                                                                                                                                                                                                                                                                                                                                                                                                                                                                                                                                                                                                                                                                                                                                                                                                                                                                                                                                                                                                                                                                                                                                                                                                                                                                                                                                                                                                                                                                                                                                                      | -    | -    | -    |
| NSAID                                                                                                                  | -                                                                                                                                                                                                                                                                                                                                                                                                                                                                                                                                                                                                                                                                                                                                                                                                                                                                                                                                                                                                                                                                                                                                                                                                                                                                                                                                                                                                                                                                                                                                                                                                                                                                                                                                                                                                      | -    | -    | -    |
| Calcium channel blocker                                                                                                | -                                                                                                                                                                                                                                                                                                                                                                                                                                                                                                                                                                                                                                                                                                                                                                                                                                                                                                                                                                                                                                                                                                                                                                                                                                                                                                                                                                                                                                                                                                                                                                                                                                                                                                                                                                                                      | -    | -    | -    |
| Renin angiotensin system inhibitor                                                                                     | -                                                                                                                                                                                                                                                                                                                                                                                                                                                                                                                                                                                                                                                                                                                                                                                                                                                                                                                                                                                                                                                                                                                                                                                                                                                                                                                                                                                                                                                                                                                                                                                                                                                                                                                                                                                                      | -    | -    | -    |
| <b>Analysis</b>                                                                                                        | <p><b>Measure of the risk of an end point</b><br/>Event rates for each outcome were calculated on an on-treatment basis as the total number of patients in each group who had the outcome during follow-up, divided by the total person-time of that event for the group. Person-time was calculated separately for each outcome; person-time consisted of the entire follow-up period for patients who did not have the outcome and the time to first occurrence for patients who did have the outcome</p> <p><b>Comparison of the risk of an end point between groups</b><br/>The time-to-event was evaluated using Kaplan-Meier survival analyses. Log-rank tests were used to assess whether statistically significant differences existed between groups. Cox proportional hazards models were used to evaluate the association between the time-to-event and treatment, adjusting for appropriate covariates if propensity score matching left an imbalance between groups</p> <p><b>Confounding</b><br/>Propensity score matching</p> <p><b>Sensitivity analysis</b><br/>Hazard ratios were also calculated for a propensity score-matched subgroup of patients with prescriptions for dabigatran 150 mg or warfarin. This subgroup included patients taking dabigatran 150 mg at index and having at least 1 postindex day of dabigatran 150 mg. Patients with both dabigatran 150 mg and dabigatran 75 mg at index (n = 8) were excluded, and follow-up was stopped when the patient started using another oral anticoagulant, including dabigatran 75 mg</p> <p><b>Software for statistical analysis</b><br/>SAS 9.3 (SAS Institute, Cary, North Carolina)</p> <p><b>Statistical significance reference</b><br/>A conventional alpha of .05 and 2-tailed level of significance were used</p> |      |      |      |

AF, atrial fibrillation; NSAIDs, nonsteroidal anti-inflammatory drugs; SD, standard deviation; TIA, transient ischemic attack.

|                                  |                                                                                                                                                                                                                                                                                                                                                                                                                                                                                                                                                                                                                                                                                                                                                                                                                                                                                                                                                                                                                                                                                                                                                                                                                 |
|----------------------------------|-----------------------------------------------------------------------------------------------------------------------------------------------------------------------------------------------------------------------------------------------------------------------------------------------------------------------------------------------------------------------------------------------------------------------------------------------------------------------------------------------------------------------------------------------------------------------------------------------------------------------------------------------------------------------------------------------------------------------------------------------------------------------------------------------------------------------------------------------------------------------------------------------------------------------------------------------------------------------------------------------------------------------------------------------------------------------------------------------------------------------------------------------------------------------------------------------------------------|
| <b>Study ID</b>                  | Yao et al. <sup>85</sup>                                                                                                                                                                                                                                                                                                                                                                                                                                                                                                                                                                                                                                                                                                                                                                                                                                                                                                                                                                                                                                                                                                                                                                                        |
| <b>Reference</b>                 | Yao X, Abraham NS, Sangaralingham LR, Bellolio MF, McBane RD, Shah ND, Noseworthy PA. Effectiveness and safety of dabigatran, rivaroxaban, and apixaban versus warfarin in nonvalvular atrial fibrillation. <i>J Am Heart Assoc.</i> 2016;5:e003725. doi:10.1161/JAHA.116.003725                                                                                                                                                                                                                                                                                                                                                                                                                                                                                                                                                                                                                                                                                                                                                                                                                                                                                                                                |
| <b>Objective</b>                 | To evaluate the effectiveness and safety of dabigatran, rivaroxaban, and apixaban vs warfarin in nonvalvular atrial fibrillation                                                                                                                                                                                                                                                                                                                                                                                                                                                                                                                                                                                                                                                                                                                                                                                                                                                                                                                                                                                                                                                                                |
| <b>Country</b>                   | United States                                                                                                                                                                                                                                                                                                                                                                                                                                                                                                                                                                                                                                                                                                                                                                                                                                                                                                                                                                                                                                                                                                                                                                                                   |
| <b>Design</b>                    | Retrospective cohort study                                                                                                                                                                                                                                                                                                                                                                                                                                                                                                                                                                                                                                                                                                                                                                                                                                                                                                                                                                                                                                                                                                                                                                                      |
| <b>Data source</b>               | The OptumLabs Data Warehouse (OLDW), which contains > 100 million privately insured and Medicare Advantage enrollees from the past 20 years throughout the United States                                                                                                                                                                                                                                                                                                                                                                                                                                                                                                                                                                                                                                                                                                                                                                                                                                                                                                                                                                                                                                        |
| <b>Time period</b>               | October 1, 2010, and June 30, 2015                                                                                                                                                                                                                                                                                                                                                                                                                                                                                                                                                                                                                                                                                                                                                                                                                                                                                                                                                                                                                                                                                                                                                                              |
| <b>NOAC</b>                      | <ul style="list-style-type: none"> <li>• Apixaban 2.5 mg twice daily</li> <li>• Apixaban 5 mg twice daily</li> <li>• Dabigatran 150 mg</li> <li>• Dabigatran 75 mg</li> <li>• Rivaroxaban</li> <li>• Rivaroxaban</li> </ul>                                                                                                                                                                                                                                                                                                                                                                                                                                                                                                                                                                                                                                                                                                                                                                                                                                                                                                                                                                                     |
| <b>Control</b>                   | Warfarin                                                                                                                                                                                                                                                                                                                                                                                                                                                                                                                                                                                                                                                                                                                                                                                                                                                                                                                                                                                                                                                                                                                                                                                                        |
| <b>Outcomes</b>                  | <b>Effectiveness</b> <ul style="list-style-type: none"> <li>• Stroke or systemic embolism, including ischemic stroke, hemorrhagic stroke, and systemic embolism</li> </ul> <b>Safety</b> <ul style="list-style-type: none"> <li>• Major bleeding, including gastrointestinal bleeding, intracranial bleeding, and bleeding from other sites</li> </ul>                                                                                                                                                                                                                                                                                                                                                                                                                                                                                                                                                                                                                                                                                                                                                                                                                                                          |
| <b>Outcome definitions</b>       | Outcomes were identified using ICD-9 codes in the primary or secondary diagnosis positions of inpatient claims. The positive predictive value in general ranged from 85% to 95%                                                                                                                                                                                                                                                                                                                                                                                                                                                                                                                                                                                                                                                                                                                                                                                                                                                                                                                                                                                                                                 |
| <b>Population (eligibility)</b>  | <p>Adult patients (aged <math>\geq 18</math> years) with nonvalvular AF who were users of apixaban, dabigatran, rivaroxaban, and warfarin during the study period were identified</p> <p>Patients were required to have at least 12 months of continuous enrollment in both medical and pharmacy insurance plans prior to the index date, defined as the baseline period. For patients who only filled warfarin and never filled NOACs, the index medication was defined as the first warfarin fill after enrolling in health plans for at least 12 months; therefore, both warfarin and NOAC cohorts included patients who had previous warfarin exposure but none had previous NOAC exposure. All patients were required to have at least 1 inpatient or outpatient AF diagnosis at either primary or secondary positions on the index date or at baseline</p> <p>Patients who had valvular heart disease, end-stage chronic kidney disease, kidney transplant, or dialysis at any time were excluded. Also excluded were patients who underwent hip or knee replacement surgery within 6 weeks prior to the index date and who had a diagnosis of deep vein thrombosis or pulmonary embolism at baseline</p> |
| <b>Population (study sample)</b> | <b>Study population</b><br>Apixaban, n = 7698<br>Dabigatran, n = 14 881<br>Rivaroxaban, n = 16 795<br>Warfarin, n = 85 869<br><b>Target population</b><br>N = 339 606<br>Excluded: <ul style="list-style-type: none"> <li>• Patients with AF diagnosis at baseline, n = 162 883</li> <li>• Patients without dialysis, kidney transplant, end-stage renal disease, or valvular heart disease, n = 29 989</li> <li>• Patients without VTE at baseline or joint replacement within 6 weeks prior to the index date, n = 20 556</li> <li>• Adult patients who had valid demographic data, were not admitted for primary outcomes or died on the index date, and the index medication was not edoxaban, n = 935</li> </ul>                                                                                                                                                                                                                                                                                                                                                                                                                                                                                           |

| <b>Population (baseline participant characteristics)</b> (values expressed as percentages unless otherwise stated) |                                                                                                                                                                                                                                                                                                                                                                                                                                                                                                                                                                                                                                                                                                                              |                 |                   |                 |                    |                 |
|--------------------------------------------------------------------------------------------------------------------|------------------------------------------------------------------------------------------------------------------------------------------------------------------------------------------------------------------------------------------------------------------------------------------------------------------------------------------------------------------------------------------------------------------------------------------------------------------------------------------------------------------------------------------------------------------------------------------------------------------------------------------------------------------------------------------------------------------------------|-----------------|-------------------|-----------------|--------------------|-----------------|
|                                                                                                                    | <b>Apixaban</b>                                                                                                                                                                                                                                                                                                                                                                                                                                                                                                                                                                                                                                                                                                              | <b>Warfarin</b> | <b>Dabigatran</b> | <b>Warfarin</b> | <b>Rivaroxaban</b> | <b>Warfarin</b> |
| <b>Women</b>                                                                                                       | 46.9                                                                                                                                                                                                                                                                                                                                                                                                                                                                                                                                                                                                                                                                                                                         | 46.8            | 39.7              | 40.4            | 43.2               | 43.7            |
| <b>Age, median (IQR)</b>                                                                                           | 73 (66-81)                                                                                                                                                                                                                                                                                                                                                                                                                                                                                                                                                                                                                                                                                                                   | 73 (66-81)      | 70 (62-78)        | 70 (61-78)      | 72 (64-79)         | 72 (64-80)      |
| >65-74 years                                                                                                       | 30.9                                                                                                                                                                                                                                                                                                                                                                                                                                                                                                                                                                                                                                                                                                                         | 30.9            | 31.5              | 30.4            | 32.9               | 32.8            |
| ≥75 years                                                                                                          | 46.4                                                                                                                                                                                                                                                                                                                                                                                                                                                                                                                                                                                                                                                                                                                         | 46.1            | 34.4              | 34.6            | 41.8               | 41.4            |
| >85 years                                                                                                          | -                                                                                                                                                                                                                                                                                                                                                                                                                                                                                                                                                                                                                                                                                                                            | -               | -                 | -               | -                  | -               |
| <b>CHA<sub>2</sub>DS<sub>2</sub>VASc, median (IQR)</b>                                                             | 4 (3-5)                                                                                                                                                                                                                                                                                                                                                                                                                                                                                                                                                                                                                                                                                                                      | 4 (3-5)         | 3 (2-5)           | 3 (2-5)         | 4 (2-5)            | 4 (2-5)         |
| <b>HAS-BLED, median (IQR)</b>                                                                                      | 2 (2-3)                                                                                                                                                                                                                                                                                                                                                                                                                                                                                                                                                                                                                                                                                                                      | 2 (2-3)         | 2 (1-3)           | 2 (1-3)         | 2 (2-3)            | 2 (2-3)         |
| <b>Standard dose</b>                                                                                               | 81.9                                                                                                                                                                                                                                                                                                                                                                                                                                                                                                                                                                                                                                                                                                                         | -               | 91.2              | -               | 78.5               | -               |
| <b>Reduced dose</b>                                                                                                | 18.1                                                                                                                                                                                                                                                                                                                                                                                                                                                                                                                                                                                                                                                                                                                         | -               | 8.8               | -               | 21.5               | -               |
| <b>Comorbidities</b>                                                                                               |                                                                                                                                                                                                                                                                                                                                                                                                                                                                                                                                                                                                                                                                                                                              |                 |                   |                 |                    |                 |
| Ischemic stroke, or systemic embolism, or TIA                                                                      | 15.1                                                                                                                                                                                                                                                                                                                                                                                                                                                                                                                                                                                                                                                                                                                         | 15.5            | 13.8              | 14.2            | 14.0               | 14.4            |
| Congestive heart failure                                                                                           | 31.4                                                                                                                                                                                                                                                                                                                                                                                                                                                                                                                                                                                                                                                                                                                         | 31.9            | 27.2              | 27.3            | 28.9               | 29.5            |
| Myocardial infarction                                                                                              | -                                                                                                                                                                                                                                                                                                                                                                                                                                                                                                                                                                                                                                                                                                                            | -               | -                 | -               | -                  | -               |
| Vascular disease                                                                                                   | 28.3                                                                                                                                                                                                                                                                                                                                                                                                                                                                                                                                                                                                                                                                                                                         | 28.4            | 23.1              | 23.4            | 26.9               | 27.5            |
| Abnormal renal function                                                                                            | 10.1                                                                                                                                                                                                                                                                                                                                                                                                                                                                                                                                                                                                                                                                                                                         | 10.1            | 5.6               | 5.6             | 7.4                | 7.3             |
| Bleeding history or predisposition                                                                                 | 31.4                                                                                                                                                                                                                                                                                                                                                                                                                                                                                                                                                                                                                                                                                                                         | 31.8            | 29.4              | 30.1            | 30.7               | 31.5            |
| Hypertension                                                                                                       | 87.5                                                                                                                                                                                                                                                                                                                                                                                                                                                                                                                                                                                                                                                                                                                         | 87.5            | 85.2              | 84.9            | 85.7               | 85.9            |
| Diabetes mellitus                                                                                                  | 35.0                                                                                                                                                                                                                                                                                                                                                                                                                                                                                                                                                                                                                                                                                                                         | 34.3            | 34.0              | 34.0            | 34.6               | 35.1            |
| Cancer                                                                                                             | -                                                                                                                                                                                                                                                                                                                                                                                                                                                                                                                                                                                                                                                                                                                            | -               | -                 | -               | -                  | -               |
| <b>Concomitant medication</b>                                                                                      |                                                                                                                                                                                                                                                                                                                                                                                                                                                                                                                                                                                                                                                                                                                              |                 |                   |                 |                    |                 |
| Aspirin (see below)                                                                                                | -                                                                                                                                                                                                                                                                                                                                                                                                                                                                                                                                                                                                                                                                                                                            | -               | -                 | -               | -                  | -               |
| Antiplatelets/NSAID                                                                                                | 12.1                                                                                                                                                                                                                                                                                                                                                                                                                                                                                                                                                                                                                                                                                                                         | 12.5            | 10.3              | 10.2            | 11.6               | 11.6            |
| Beta-blocker                                                                                                       | 47.5                                                                                                                                                                                                                                                                                                                                                                                                                                                                                                                                                                                                                                                                                                                         | 47.8            | 44.6              | 44.5            | 45.6               | 45.0            |
| NSAID                                                                                                              | -                                                                                                                                                                                                                                                                                                                                                                                                                                                                                                                                                                                                                                                                                                                            | -               | -                 | -               | -                  | -               |
| Other calcium channel blocker                                                                                      | 16.6                                                                                                                                                                                                                                                                                                                                                                                                                                                                                                                                                                                                                                                                                                                         | 16.3            | 13.3              | 13.4            | 14.9               | 14.7            |
| Renin angiotensin system inhibitor                                                                                 | 47.1                                                                                                                                                                                                                                                                                                                                                                                                                                                                                                                                                                                                                                                                                                                         | 47.2            | 45.4              | 45.0            | 45.5               | 46.0            |
| Amiodarone                                                                                                         | 9.6                                                                                                                                                                                                                                                                                                                                                                                                                                                                                                                                                                                                                                                                                                                          | 10.1            | 8.4               | 8.4             | 8.3                | 8.8             |
| Dronedarone                                                                                                        | 2.8                                                                                                                                                                                                                                                                                                                                                                                                                                                                                                                                                                                                                                                                                                                          | 2.6             | 3.7               | 4.2             | 2.4                | 2.6             |
| Other antiarrhythmic drug                                                                                          | 11.1                                                                                                                                                                                                                                                                                                                                                                                                                                                                                                                                                                                                                                                                                                                         | 10.7            | 12.8              | 12.9            | 11.0               | 11.2            |
| Digoxin                                                                                                            | 8.9                                                                                                                                                                                                                                                                                                                                                                                                                                                                                                                                                                                                                                                                                                                          | 9.1             | 13.6              | 13.6            | 10.8               | 11.1            |
| Diltiazem                                                                                                          | 16.9                                                                                                                                                                                                                                                                                                                                                                                                                                                                                                                                                                                                                                                                                                                         | 17.0            | 17.5              | 17.3            | 17.5               | 17.9            |
| Verapamil                                                                                                          | 1.3                                                                                                                                                                                                                                                                                                                                                                                                                                                                                                                                                                                                                                                                                                                          | 1.3             | 1.9               | 1.9             | 1.7                | 1.7             |
| Statin                                                                                                             | 45.6                                                                                                                                                                                                                                                                                                                                                                                                                                                                                                                                                                                                                                                                                                                         | 46.7            | 41.5              | 41.2            | 43.0               | 43.9            |
| Other cholesterol reducer                                                                                          | 5.9                                                                                                                                                                                                                                                                                                                                                                                                                                                                                                                                                                                                                                                                                                                          | 5.9             | 7.3               | 7.6             | 5.7                | 5.7             |
| Diuretics                                                                                                          | 32.3                                                                                                                                                                                                                                                                                                                                                                                                                                                                                                                                                                                                                                                                                                                         | 31.8            | 28.5              | 28.5            | 29.6               | 29.6            |
| Metformin                                                                                                          | 11.1                                                                                                                                                                                                                                                                                                                                                                                                                                                                                                                                                                                                                                                                                                                         | 10.7            | 10.2              | 9.9             | 10.6               | 11.0            |
| Sulfonylurea                                                                                                       | 6.0                                                                                                                                                                                                                                                                                                                                                                                                                                                                                                                                                                                                                                                                                                                          | 6.0             | 6.0               | 5.9             | 6.0                | 5.9             |
| Thiazolidinedione                                                                                                  | 0.8                                                                                                                                                                                                                                                                                                                                                                                                                                                                                                                                                                                                                                                                                                                          | 0.8             | 1.5               | 1.3             | 0.9                | 0.9             |
| Insulin                                                                                                            | 7.3                                                                                                                                                                                                                                                                                                                                                                                                                                                                                                                                                                                                                                                                                                                          | 7.3             | 6.8               | 7.1             | 7.1                | 7.5             |
| Other diabetes drug                                                                                                | 3.1                                                                                                                                                                                                                                                                                                                                                                                                                                                                                                                                                                                                                                                                                                                          | 2.9             | 2.8               | 2.9             | 2.7                | 2.9             |
| Antiulcer agent                                                                                                    | 21.9                                                                                                                                                                                                                                                                                                                                                                                                                                                                                                                                                                                                                                                                                                                         | 21.4            | 18.4              | 18.4            | 20.3               | 21.2            |
| Antidepressant                                                                                                     | 16.2                                                                                                                                                                                                                                                                                                                                                                                                                                                                                                                                                                                                                                                                                                                         | 16.1            | 14.5              | 15.0            | 15.3               | 15.6            |
| <b>Analysis</b>                                                                                                    | <b>Measure of the risk of an end point</b><br>Three matched cohorts (dabigatran vs warfarin, rivaroxaban vs warfarin, and apixaban vs warfarin) using 1:1 propensity score matching without replacement and with a caliper of 0.01. Propensity scores for NOAC treatment were estimated using logistic regression<br><b>Comparison of the risk of an end point between groups</b><br>Cox proportional hazards regression was used to compare outcomes in each of the propensity score-matched cohorts<br><b>Sensitivity analysis</b><br>The risk of stroke or systemic embolism was compared, including all events that occurred between the index date and the end of the enrollment or study period (an intention-to-treat |                 |                   |                 |                    |                 |

|                                                                                                                                                                                                                                                          |                                                                                                                                                                                                                                                                                                                                                                                                                                                                                                                                                                                                                                                                                                                                                                                                                                                                                                                                                                                                                                                                                                                                                                                                                                                                                                                                                                                                                    |
|----------------------------------------------------------------------------------------------------------------------------------------------------------------------------------------------------------------------------------------------------------|--------------------------------------------------------------------------------------------------------------------------------------------------------------------------------------------------------------------------------------------------------------------------------------------------------------------------------------------------------------------------------------------------------------------------------------------------------------------------------------------------------------------------------------------------------------------------------------------------------------------------------------------------------------------------------------------------------------------------------------------------------------------------------------------------------------------------------------------------------------------------------------------------------------------------------------------------------------------------------------------------------------------------------------------------------------------------------------------------------------------------------------------------------------------------------------------------------------------------------------------------------------------------------------------------------------------------------------------------------------------------------------------------------------------|
|                                                                                                                                                                                                                                                          | <p>analytic approach). The study population was limited to patients initiating NOACs from January 1, 2013 to June 30, 2015</p> <p>Because apixaban became available in the United States in December 2012, apixaban users had a shorter follow-up time than those of other agents. Sensitivity analyses were conducted to censor patients at 6 months so that all drugs had a similar follow-up time</p> <p>Patients who had catheter ablation within 2 months prior to the index medication and those who had cardioversion 1 month before and 1 month after the index medication were excluded</p> <p>Subgroup analyses were conducted based on baseline time in therapeutic range (TTR) in patients with prior warfarin experience and based on follow-up TTR. The TTR was calculated using Rosendaal's method, which uses linear interpolation to assign an INR value to each day between successive observed INR values. Gaps of 56 days between INR values were not interpolated. After interpolation, the percentage of time during which the interpolated INR values lay between 2.0 and 3.0 (from 0% to 100%) was calculated. The follow-up TTRs of NOAC-treated patients were assigned based on the TTRs of their matched warfarin controls. A labile INR was defined as TTR &lt; 60%</p> <p><b>Software for statistical analysis</b></p> <p>SAS 9.4 (SAS Institute Inc) and Stata 14.1 (Stata Corp)</p> |
| <p>AF, atrial fibrillation; IQR, interquartile range; NOACs, nonvitamin K antagonist oral anticoagulants; NSAIDs, nonsteroidal anti-inflammatory drugs; TIA, transient ischemic attack; TTR, time in therapeutic range; VTE, venous thromboembolism.</p> |                                                                                                                                                                                                                                                                                                                                                                                                                                                                                                                                                                                                                                                                                                                                                                                                                                                                                                                                                                                                                                                                                                                                                                                                                                                                                                                                                                                                                    |



## FIGURE LEGEND

**Figure of the supplementary material.** HRs with 95%CI for ischemic stroke (A), ischemic stroke plus systemic embolism (B), major bleeding (C), and intracranial hemorrhage (D) in patients with AF treated with DOACs vs VKAs using the longer-term data available in each study. 95%CI, 95% confidence interval; AF, atrial fibrillation; DOACs, direct oral anticoagulants; HR, hazard ratio; IV, interval variable, SE, systemic embolism, VKAs, vitamin K antagonists.
